# Supplementary material for: Where three snail species attach while emersed in relation to heterogenous substrate temperatures underneath intertidal boulders
Source: PeerJ. 2021 Jul 9;9:e11675. doi: 10.7717/peerj.11675 (PMC8274491; doi:10.7717/peerj.11675)
Supplement: Supplemental Information 1 [file peerj-09-11675-s001.xlsx]

## Sheet: U>L>S
Air temp	Maximum	Minimum	Average	Range		Site	Replicate	Surface
27	38	31.6	34.3	6.4		O'Sullivan Beach	1	Upper
27	36.1	26.7	31.1	9.4		O'Sullivan Beach	1	Lower
27	32.8	22.9	28.3	9.9		O'Sullivan Beach	1	Substrate
27	41.2	30.9	36.8	10.3		O'Sullivan Beach	2	Upper
27	39.5	30.1	35.5	9.4		O'Sullivan Beach	2	Lower
27	31.9	23.3	28.1	8.6		O'Sullivan Beach	2	Substrate
27	39.5	32.3	36.1	7.2		O'Sullivan Beach	3	Upper
27	36.8	28.2	32.7	8.6		O'Sullivan Beach	3	Lower
27	36	22.3	27	13.7		O'Sullivan Beach	3	Substrate
27	36.4	27.8	32.1	8.6		O'Sullivan Beach	4	Lower
27	35.5	23.3	28.1	12.2		O'Sullivan Beach	4	Substrate
27	38.3	30.6	35.4	7.7		O'Sullivan Beach	4	Upper
27	38	30.2	34.7	7.8		O'Sullivan Beach	5	Upper
27	37.2	29.3	32.6	7.9		O'Sullivan Beach	5	Lower
27	31.3	22.2	25.8	9.1		O'Sullivan Beach	5	Substrate
27	38.1	28.5	34.3	9.6		O'Sullivan Beach	6	Upper
27	36.5	26.7	31.9	9.8		O'Sullivan Beach	6	Lower
27	34.2	22.7	28.2	11.5		O'Sullivan Beach	6	Substrate
27	36.1	29.8	33.6	6.3		O'Sullivan Beach	7	Upper
27	34.6	27.1	30.5	7.5		O'Sullivan Beach	7	Lower
27	31.5	22.7	26.5	8.8		O'Sullivan Beach	7	Substrate
27	35.1	29.6	32.9	5.5		O'Sullivan Beach	8	Upper
27	34.9	22.5	31.1	12.4		O'Sullivan Beach	8	Lower
27	30.7	22.7	25.9	8		O'Sullivan Beach	8	Substrate
33	48.4	38.8	45.2	9.6		Marino Rocks	1	Upper
33	47.3	36.3	43.3	11		Marino Rocks	1	Lower
33	37.8	28.3	33.5	9.5		Marino Rocks	1	Substrate
33	46.3	35.9	40.5	10.4		Marino Rocks	2	Upper
33	46.7	35.4	39.7	11.3		Marino Rocks	2	Lower
33	35.5	27.9	32.1	7.6		Marino Rocks	2	Substrate
33	49.2	40.2	43.9	9		Marino Rocks	3	Upper
33	44.9	36.9	41.1	8		Marino Rocks	3	Lower
33	43.1	31.4	34.7	11.7		Marino Rocks	3	Substrate
33	47.9	38.4	42.8	9.5		Marino Rocks	4	Upper
33	46.9	38.2	41.3	8.7		Marino Rocks	4	Lower
33	38.1	29.8	33.5	8.3		Marino Rocks	4	Substrate
33	46.9	37.5	42	9.4		Marino Rocks	5	Upper
33	43.8	35.1	38.9	8.7		Marino Rocks	5	Lower
33	36.4	31.3	33.5	5.1		Marino Rocks	5	Substrate
33	38	33.9	36.3	4.1		Marino Rocks	6	Upper
33	38.1	35.2	36.5	2.9		Marino Rocks	6	Lower
33	31.7	27.3	30.3	4.4		Marino Rocks	6	Substrate
33	46.3	35.6	40.5	10.7		Marino Rocks	7	Upper
33	43.5	35.8	39.4	7.7		Marino Rocks	7	Lower
33	36	29.3	32.3	6.7		Marino Rocks	7	Substrate
33	46.6	36.8	40.8	9.8		Marino Rocks	8	Upper
33	46.6	36.1	40.5	10.5		Marino Rocks	8	Lower
33	38.5	29.4	33.1	9.1		Marino Rocks	8	Substrate

## Sheet: U>L>S difference
Site	Replicate	Air temp	Upper max	Upper min	Upper Age	Upper range	Lower max	Lower min	Lower Age	Lower range	Sub max	Sub min	Sub age	Sub range	Max upper-lower	Max upper-substrate	Max lower-substrate	Min upper-lower	Min upper-substrate	Min lower-substrate	Age upper-lower	Age upper-substrate	Age lower-substrate
O'Sullivan Beach	1	27	38	31.6	34.3	6.4	36.1	26.7	31.1	9.4	32.8	22.9	28.3	9.9	1.9	5.2	3.3	4.9	8.7	3.8	3.2	6	2.8
O'Sullivan Beach	2	27	41.2	30.9	36.8	10.3	39.5	30.1	35.5	9.4	31.9	23.3	28.1	8.6	1.7	9.3	7.6	0.8	7.6	6.8	1.3	8.7	7.4
O'Sullivan Beach	3	27	39.5	32.3	36.1	7.2	36.8	28.2	32.7	8.6	36	22.3	27	13.7	2.7	3.5	0.8	4.1	10	5.9	3.4	9.1	5.7
O'Sullivan Beach	4	27	38.3	30.6	35.4	7.7	36.4	27.8	32.1	8.6	35.5	23.3	28.1	12.2	1.9	2.8	0.9	2.8	7.3	4.5	3.3	7.3	4
O'Sullivan Beach	5	27	38	30.2	34.7	7.8	37.2	29.3	32.6	7.9	31.3	22.2	25.8	9.1	0.8	6.7	5.9	0.9	8	7.1	2.1	8.9	6.8
O'Sullivan Beach	6	27	38.1	28.5	34.3	9.6	36.5	26.7	31.9	9.8	34.2	22.7	28.2	11.5	1.6	3.9	2.3	1.8	5.8	4	2.4	6.1	3.7
O'Sullivan Beach	7	27	36.1	29.8	33.6	6.3	34.6	27.1	30.5	7.5	31.5	22.7	26.5	8.8	1.5	4.6	3.1	2.7	7.1	4.4	3.1	7.1	4
O'Sullivan Beach	8	27	35.1	29.6	32.9	5.5	34.9	22.5	31.1	12.4	30.7	22.7	25.9	8	0.2	4.4	4.2	7.1	6.9	-0.2	1.8	7	5.2
Marino Rocks	1	33	48.4	38.8	45.2	9.6	47.3	36.3	43.3	11	37.8	28.3	33.5	9.5	1.1	10.6	9.5	2.5	10.5	8	1.9	11.7	9.8
Marino Rocks	2	33	46.3	35.9	40.5	10.4	46.7	35.4	39.7	11.3	35.5	27.9	32.1	7.6	-0.4	10.8	11.2	0.5	8	7.5	0.8	8.4	7.6
Marino Rocks	3	33	49.2	40.2	43.9	9	44.9	36.9	41.1	8	43.1	31.4	34.7	11.7	4.3	6.1	1.8	3.3	8.8	5.5	2.8	9.2	6.4
Marino Rocks	4	33	47.9	38.4	42.8	9.5	46.9	38.2	41.3	8.7	38.1	29.8	33.5	8.3	1	9.8	8.8	0.2	8.6	8.4	1.5	9.3	7.8
Marino Rocks	5	33	46.9	37.5	42	9.4	43.8	35.1	38.9	8.7	36.4	31.3	33.5	5.1	3.1	10.5	7.4	2.4	6.2	3.8	3.1	8.5	5.4
Marino Rocks	6	33	38	33.9	36.3	4.1	38.1	35.2	36.5	2.9	31.7	27.3	30.3	4.4	-0.1	6.3	6.4	-1.3	6.6	7.9	-0.2	6	6.2
Marino Rocks	7	33	46.3	35.6	40.5	10.7	43.5	35.8	39.4	7.7	36	29.3	32.3	6.7	2.8	10.3	7.5	-0.2	6.3	6.5	1.1	8.2	7.1
Marino Rocks	8	33	46.6	36.8	40.8	9.8	46.6	36.1	40.5	10.5	38.5	29.4	33.1	9.1	0	8.1	8.1	0.7	7.4	6.7	0.3	7.7	7.4

## Sheet: Iced snails
Seashore	Replicate	Average + snail	Average - snail	Difference
O'Sullivan Beach	1	33.6	33.3	-0.3
O'Sullivan Beach	2	37	36.7	-0.3
O'Sullivan Beach	3	36.6	36.7	0.1
O'Sullivan Beach	4	36.3	36.4	0.1
O'Sullivan Beach	5	39.5	39.6	0.1
O'Sullivan Beach	6	39.2	39.2	0
O'Sullivan Beach	7	39.2	39.2	0
O'Sullivan Beach	8	36.4	35.8	-0.6
O'Sullivan Beach	9	37.5	37.5	0
O'Sullivan Beach	10	37.8	37.5	-0.3
Marino Rocks	1	38.5	38.9	0.4
Marino Rocks	2	35	34.5	-0.5
Marino Rocks	3	34.9	34.9	0
Marino Rocks	4	41.1	41.6	0.5
Marino Rocks	5	36.7	37.2	0.5
Marino Rocks	6	35.1	35.4	0.3
Marino Rocks	7	34.4	34.4	0
Marino Rocks	8	36.6	36.6	0
Marino Rocks	9	38.3	38.3	0
Marino Rocks	10	38	37.8	-0.2

## Sheet: Thick v thin
Maximum	Minimum	Average	Range		Date	Thickness	Surface condition	Air temp
34	24.8	28.2	9.2		February 26th	Thick	Dry	22
43.5	34.7	37.2	8.8		February 26th	Thin	Dry	22
34.8	24	28.6	10.8		February 26th	Thick	Dry	22
33.5	27.3	29.1	6.2		February 26th	Thick	Dry	22
37.5	28.9	33.8	8.6		February 26th	Thin	Dry	22
26.4	19.8	23.1	6.6		February 26th	Thick	Wet	22
36.4	26.4	30.7	10		February 26th	Thin	Dry	22
41.2	28.3	33	12.9		February 26th	Thick	Dry	22
44.6	34.9	38.3	9.7		February 26th	Thin	Dry	22
31.6	26.4	29.2	5.2		February 26th	Thick	Dry	22
36.4	27.5	31.1	8.9		February 26th	Thick	Dry	22
40.3	31.8	36.1	8.5		February 26th	Thin	Dry	22
40.4	26.7	31.3	13.7		February 26th	Thin	Dry	22
41.9	30.5	34.8	11.4		February 26th	Thin	Dry	22
38.8	25.3	30.4	13.5		February 26th	Thick	Dry	22
40.1	33.1	36.2	7		February 26th	Thin	Dry	22
37.4	27.3	31	10.1		February 26th	Thick	Dry	22
39.6	30.4	34.9	9.2		February 26th	Thin	Dry	22
37.5	33.3	35	4.2		February 26th	Thin	Dry	22
35.2	27.2	30.7	8		February 26th	Thick	Dry	22
36.4	28.8	32.3	7.6		February 27th	Thick	Dry	29
44.7	36.1	41.7	8.6		February 27th	Thin	Dry	29
33.5	26.3	29.9	7.2		February 27th	Thick	Wet	29
35.5	25.3	30.7	10.2		February 27th	Thick	Dry	29
44	34.2	37.8	9.8		February 27th	Thin	Dry	29
41.4	30.8	35.8	10.6		February 27th	Thin	Dry	29
44.2	35.3	38.8	8.9		February 27th	Thin	Dry	29
39.5	32.5	35.4	7		February 27th	Thick	Dry	29
42.5	32.1	36.3	10.4		February 27th	Thick	Dry	29
41.5	36.2	38.3	5.3		February 27th	Thin	Dry	29
43.4	32.8	39	10.6		February 27th	Thin	Dry	29
40.4	32.6	35.8	7.8		February 27th	Thick	Dry	29
43.3	33.8	36.7	9.5		February 27th	Thin	Dry	29
44.3	34.1	38.6	10.2		February 27th	Thin	Dry	29
39.3	32.9	36.4	6.4		February 27th	Thin	Dry	29
40.3	31.2	34.4	9.1		February 27th	Thick	Dry	29
39.6	31.2	35	8.4		February 27th	Thick	Wet	29
45.3	39.7	42	5.6		February 27th	Thin	Dry	29
44.5	32.5	38.1	12		February 27th	Thick	Dry	29
42.5	33.4	36.4	9.1		February 27th	Thick	Dry	29

## Sheet: Emersion times
Date	Seashore	Thermal image	Time	Emersion time	Air temp	Oktas	Species	Surface condition	Target temp	Species aspect	Species location	Max temp	Max location	Max aspect	Min temp	Min locaton	Min aspect	Average temp	Range	Max - target	Target - min	Target - average
February 3rd	Marino Rocks	1	12:15pm	1 hour	26	0	Bembicium nanum	Wet	27.3	East	Edge	33.4	Edge	West	24.9	Flat	Centre	27.9	8.5	-6.1	2.4	-0.6
February 3rd	Marino Rocks	2	12:16pm	1 hour	26	0	Bembicium nanum	Dry	34.8	East	Flat	38.4	Flat	West	30.1	Edge	East	35.3	8.3	-3.6	4.7	-0.5
February 3rd	Marino Rocks	3	12:18pm	1 hour	26	0	Bembicium nanum	Dry	31.8	East	Flat	37.5	Edge	Centre	27.4	Flat	Centre	31.1	10.1	-5.7	4.4	0.7
February 3rd	Marino Rocks	4	12:20pm	1 hour	26	0	Bembicium nanum	Dry	25.2	Centre	Flat	35.2	Edge	West	24.8	Flat	Centre	29	10.4	-10	0.4	-3.8
February 3rd	Marino Rocks	5	12:21pm	1 hour	26	0	Bembicium nanum	Dry	27.9	Centre	Flat	38.2	Edge	East	26.4	Flat	Centre	29.6	11.8	-10.3	1.5	-1.7
February 3rd	Marino Rocks	6	12:24pm	1 hour	26	0	Bembicium nanum	Dry	33.9	Centre	Flat	38.1	Edge	East	31.2	Flat	Centre	33.7	6.9	-4.2	2.7	0.2
February 3rd	Marino Rocks	7	12:25pm	1 hour	26	0	Bembicium nanum	Dry	30	East	Flat	39.5	Edge	West	26.2	Flat	Centre	30.7	13.3	-9.5	3.8	-0.7
February 3rd	Marino Rocks	8	12:27pm	1 hour	26	0	Bembicium nanum	Dry	31.9	East	Flat	37.3	Edge	Centre	24.5	Flat	West	30.3	12.8	-5.4	7.4	1.6
February 3rd	Marino Rocks	9	12:28pm	1 hour	26	0	Bembicium nanum	Dry	38.7	East	Flat	42.3	Edge	East	28.3	Flat	Centre	34.2	14	-3.6	10.4	4.5
February 3rd	Marino Rocks	10	12:30pm	1 hour	26	0	Bembicium nanum	Dry	34.3	West	Edge	40.7	Edge	East	31.1	Flat	Centre	34.2	9.6	-6.4	3.2	0.1
February 3rd	Marino Rocks	11	12:31pm	1 hour	26	0	Bembicium nanum	Dry	34.4	Centre	Flat	39.6	Edge	West	27.3	Flat	Centre	31.6	12.3	-5.2	7.1	2.8
February 3rd	Marino Rocks	12	12:33pm	1 hour	26	0	Bembicium nanum	Dry	35	Centre	Edge	37.8	Edge	East	26.2	Flat	West	31.2	11.6	-2.8	8.8	3.8
February 3rd	Marino Rocks	13	12:34pm	1 hour	26	0	Bembicium nanum	Dry	34.5	East	Flat	40.2	Edge	Centre	30.7	Edge	West	35.2	9.5	-5.7	3.8	-0.7
February 3rd	Marino Rocks	14	12:37pm	1 hour	26	0	Bembicium nanum	Wet	29.1	East	Edge	34.7	Edge	West	26.7	Flat	Centre	28.8	8	-5.6	2.4	0.3
February 3rd	Marino Rocks	15	12:38pm	1 hour	26	0	Bembicium nanum	Dry	33.7	East	Flat	38.9	Edge	East	25.2	Edge	Centre	29.9	13.7	-5.2	8.5	3.8
February 3rd	Marino Rocks	16	12:41pm	1 hour	26	0	Bembicium nanum	Dry	32.8	East	Flat	40.1	Edge	East	32.1	Flat	Centre	34.3	8	-7.3	0.7	-1.5
February 3rd	Marino Rocks	17	12:42pm	1 hour	26	0	Bembicium nanum	Dry	29.1	East	Edge	35.1	Edge	West	25.5	Flat	Centre	28.7	9.6	-6	3.6	0.4
February 3rd	Marino Rocks	18	12:44pm	1 hour	26	0	Bembicium nanum	Dry	30.1	East	Edge	41.4	Edge	Centre	27.8	Flat	Centre	32.9	13.6	-11.3	2.3	-2.8
February 3rd	Marino Rocks	19	12:45pm	1 hour	26	0	Bembicium nanum	Dry	32.7	Centre	Drop	37.8	Edge	Centre	28.7	Flat	Centre	32.3	9.1	-5.1	4	0.4
February 3rd	Marino Rocks	20	12:47pm	1 hour	26	0	Bembicium nanum	Dry	30.2	East	Edge	35.6	Edge	West	27.3	Flat	Centre	30.2	8.3	-5.4	2.9	0
February 3rd	Marino Rocks	21	12:49pm	1 hour	26	0	Bembicium nanum	Dry	31.7	Centre	Flat	41.7	Edge	Centre	29.2	Flat	Centre	33.7	12.5	-10	2.5	-2
February 3rd	Marino Rocks	22	12:50pm	1 hour	26	0	Bembicium nanum	Dry	32.1	West	Edge	42.3	Edge	East	31.7	Flat	Centre	35.2	10.6	-10.2	0.4	-3.1
February 3rd	Marino Rocks	23	12:51pm	1 hour	26	0	Bembicium nanum	Dry	32.8	East	Edge	39.3	Edge	West	30.1	Flat	East	32.8	9.2	-6.5	2.7	0
February 3rd	Marino Rocks	24	12:53pm	1 hour	26	0	Bembicium nanum	Dry	31.8	East	Flat	40.8	Edge	Centre	26.4	Depression	Centre	33.8	14.4	-9	5.4	-2
February 3rd	Marino Rocks	25	12:55pm	1 hour	26	0	Bembicium nanum	Dry	31.4	Centre	Edge	41.4	Edge	East	27.8	Edge	Centre	33.9	13.6	-10	3.6	-2.5
February 3rd	Marino Rocks	26	12:56pm	1 hour	26	0	Bembicium nanum	Dry	35.4	Centre	Flat	42.4	Edge	Centre	31.5	Edge	East	36.2	10.9	-7	3.9	-0.8
February 3rd	Marino Rocks	27	12:59pm	1 hour	26	0	Bembicium nanum	Dry	33.4	Centre	Flat	39.6	Edge	Centre	28	Flat	West	32.5	11.6	-6.2	5.4	0.9
February 3rd	Marino Rocks	28	1:01pm	1 hour	26	0	Bembicium nanum	Dry	39.5	East	Edge	42	Edge	West	34.8	Flat	East	38.7	7.2	-2.5	4.7	0.8
February 3rd	Marino Rocks	29	1:03pm	1 hour	26	0	Bembicium nanum	Dry	36.7	West	Flat	41.3	Edge	Centre	34	Flat	West	36.3	7.3	-4.6	2.7	0.4
February 3rd	Marino Rocks	30	1:04pm	1 hour	26	0	Bembicium nanum	Wet	29.5	West	Edge	40.9	Edge	Centre	28.5	Flat	West	34.8	12.4	-11.4	1	-5.3
February 3rd	Marino Rocks	31	1:14pm	2 hours	26	0	Bembicium nanum	Dry	32.4	Centre	Depression	39.4	Edge	West	30.2	Flat	Centre	33.3	9.2	-7	2.2	-0.9
February 3rd	Marino Rocks	32	1:16pm	2 hours	26	0	Bembicium nanum	Dry	35.3	Centre	Flat	42.8	Edge	Centre	27.9	Edge	West	33.7	14.9	-7.5	7.4	1.6
February 3rd	Marino Rocks	33	1:19pm	2 hours	26	0	Bembicium nanum	Dry	41.5	West	Flat	43	Edge	Centre	32.9	Edge	Centre	38.5	10.1	-1.5	8.6	3
February 3rd	Marino Rocks	34	1:20pm	2 hours	26	0	Bembicium nanum	Dry	31.1	Centre	Flat	35.7	Edge	West	25.6	Flat	Centre	30.3	10.1	-4.6	5.5	0.8
February 3rd	Marino Rocks	35	1:24pm	2 hours	26	0	Bembicium nanum	Dry	30.7	Centre	Flat	38.2	Edge	West	29.4	Flat	Centre	32.6	8.8	-7.5	1.3	-1.9
February 3rd	Marino Rocks	36	1:25pm	2 hours	26	0	Bembicium nanum	Dry	32.2	East	Flat	39.8	Edge	Centre	25.4	Flat	Centre	32.8	14.4	-7.6	6.8	-0.6
February 3rd	Marino Rocks	37	1:27pm	2 hours	26	0	Bembicium nanum	Dry	30.8	East	Flat	36.1	Edge	West	28.7	Flat	Centre	31.9	7.4	-5.3	2.1	-1.1
February 3rd	Marino Rocks	38	1:29pm	2 hours	26	0	Bembicium nanum	Dry	36.6	Centre	Edge	39.6	Edge	Centre	29.2	Flat	Centre	34.6	10.4	-3	7.4	2
February 3rd	Marino Rocks	39	1:32pm	2 hours	26	0	Bembicium nanum	Dry	39.2	East	Edge	42	Edge	East	28.6	Edge	East	34	13.4	-2.8	10.6	5.2
February 3rd	Marino Rocks	40	1:34pm	2 hours	26	0	Bembicium nanum	Dry	35.2	Centre	Flat	41.4	Edge	West	29.1	Edge	East	34.6	12.3	-6.2	6.1	0.6
February 3rd	Marino Rocks	41	1:36pm	2 hours	26	0	Bembicium nanum	Dry	38.3	Centre	Flat	42.3	Edge	Centre	33.2	Flat	Centre	36.9	9.1	-4	5.1	1.4
February 3rd	Marino Rocks	42	1:37pm	2 hours	26	0	Bembicium nanum	Dry	35.8	East	Flat	38.5	Edge	Centre	30.9	Flat	Centre	34.4	7.6	-2.7	4.9	1.4
February 3rd	Marino Rocks	43	1:38pm	2 hours	26	0	Bembicium nanum	Dry	32.7	West	Edge	35.1	Edge	East	28.8	Flat	Centre	31.1	6.3	-2.4	3.9	1.6
February 3rd	Marino Rocks	44	1:40pm	2 hours	26	0	Bembicium nanum	Dry	38.8	East	Flat	42.4	Edge	East	32.2	Edge	Centre	37.5	10.2	-3.6	6.6	1.3
February 3rd	Marino Rocks	45	1:42pm	2 hours	26	0	Bembicium nanum	Dry	40.4	East	Edge	41.3	Edge	East	34.5	Edge	West	38.5	6.8	-0.9	5.9	1.9
February 3rd	Marino Rocks	46	1:45pm	2 hours	26	0	Bembicium nanum	Wet	28.8	West	Edge	35.7	Edge	East	25.3	Edge	West	29.7	10.4	-6.9	3.5	-0.9
February 3rd	Marino Rocks	47	1:46pm	2 hours	26	0	Bembicium nanum	Dry	35.6	West	Flat	40.2	Edge	West	32.3	Edge	East	35	7.9	-4.6	3.3	0.6
February 3rd	Marino Rocks	48	1:47pm	2 hours	26	0	Bembicium nanum	Dry	35.6	Centre	Drop	41.7	Edge	East	32.8	Flat	Centre	36.4	8.9	-6.1	2.8	-0.8
February 3rd	Marino Rocks	49	1:49pm	2 hours	26	0	Bembicium nanum	Dry	36	Centre	Flat	43.5	Edge	Centre	33.8	Edge	East	37.4	9.7	-7.5	2.2	-1.4
February 3rd	Marino Rocks	50	1:51pm	2 hours	26	0	Bembicium nanum	Dry	31	East	Flat	40.4	Edge	West	30.3	Flat	East	34	10.1	-9.4	0.7	-3
February 3rd	Marino Rocks	51	1:53pm	2 hours	26	0	Bembicium nanum	Dry	33.6	East	Flat	42.1	Edge	East	30.3	Flat	Centre	34.2	11.8	-8.5	3.3	-0.6
February 3rd	Marino Rocks	52	1:54pm	2 hours	26	0	Bembicium nanum	Dry	35.9	Centre	Flat	41.3	Edge	West	34.1	Flat	East	36.8	7.2	-5.4	1.8	-0.9
February 3rd	Marino Rocks	53	1:56pm	2 hours	26	0	Bembicium nanum	Dry	36.5	West	Edge	42.3	Edge	Centre	29.4	Depression	East	35.5	12.9	-5.8	7.1	1
February 3rd	Marino Rocks	54	1:57pm	2 hours	26	0	Bembicium nanum	Dry	33.1	East	Edge	39.9	Edge	Centre	30.2	Flat	Centre	33.3	9.7	-6.8	2.9	-0.2
February 3rd	Marino Rocks	55	2:00pm	2 hours	26	0	Bembicium nanum	Dry	34.8	East	Flat	39.8	Edge	East	29.4	Flat	Centre	32.5	10.4	-5	5.4	2.3
February 3rd	Marino Rocks	56	2:01pm	2 hours	26	0	Bembicium nanum	Dry	33.3	East	Edge	40.7	Edge	West	29	Flat	Centre	35.2	11.7	-7.4	4.3	-1.9
February 3rd	Marino Rocks	57	2:03pm	2 hours	26	0	Bembicium nanum	Dry	34.2	Centre	Flat	41.9	Edge	West	31.2	Flat	Centre	34.8	10.7	-7.7	3	-0.6
February 3rd	Marino Rocks	58	2:05pm	2 hours	26	0	Bembicium nanum	Dry	35.8	East	Flat	39.9	Edge	East	30.4	Flat	Centre	33.5	9.5	-4.1	5.4	2.3
February 3rd	Marino Rocks	59	2:06pm	2 hours	26	0	Bembicium nanum	Dry	31.9	West	Edge	38.4	Edge	East	31	Flat	Centre	33.6	7.4	-6.5	0.9	-1.7
February 3rd	Marino Rocks	60	2:12pm	2 hours	26	0	Bembicium nanum	Dry	33.6	West	Edge	38	Edge	West	27.5	Edge	East	32.4	10.5	-4.4	6.1	1.2
February 3rd	Marino Rocks	61	3:12pm	4 hours	24	0	Bembicium nanum	Dry	34.2	Centre	Flat	39.8	Edge	West	30.8	Flat	Centre	34.4	9	-5.6	3.4	-0.2
February 3rd	Marino Rocks	62	3:14pm	4 hours	24	0	Bembicium nanum	Dry	36.8	East	Flat	40.2	Edge	West	30.8	Edge	East	34.5	9.4	-3.4	6	2.3
February 3rd	Marino Rocks	63	3:15pm	4 hours	24	0	Bembicium nanum	Dry	36.5	West	Flat	40.9	Edge	Centre	31.6	Flat	Centre	35.7	9.3	-4.4	4.9	0.8
February 3rd	Marino Rocks	64	3:16pm	4 hours	24	0	Bembicium nanum	Dry	37	East	Depression	40	Edge	Centre	28.2	Edge	Centre	33.2	11.8	-3	8.8	3.8
February 3rd	Marino Rocks	65	3:18pm	4 hours	24	0	Bembicium nanum	Dry	34.6	East	Flat	38.9	Edge	Centre	29.7	Flat	Centre	33.7	9.2	-4.3	4.9	0.9
February 3rd	Marino Rocks	66	3:21pm	4 hours	24	0	Bembicium nanum	Dry	32.5	Centre	Flat	37.8	Edge	Centre	29.2	Flat	Centre	32.9	8.6	-5.3	3.3	-0.4
February 3rd	Marino Rocks	67	3:22pm	4 hours	24	0	Bembicium nanum	Dry	33.4	West	Edge	38.8	Edge	Centre	32.3	Flat	Centre	34.8	6.5	-5.4	1.1	-1.4
February 3rd	Marino Rocks	68	3:24pm	4 hours	24	0	Bembicium nanum	Dry	32.1	Centre	Flat	36.3	Edge	West	28	Edge	East	30.2	8.3	-4.2	4.1	1.9
February 3rd	Marino Rocks	69	3:26pm	4 hours	24	0	Bembicium nanum	Dry	34.8	East	Flat	40.3	Edge	West	33	Flat	East	36.1	7.3	-5.5	1.8	-1.3
February 3rd	Marino Rocks	70	3:32pm	4 hours	24	0	Bembicium nanum	Dry	32.3	West	Edge	38.1	Edge	East	30	Flat	Centre	33.5	8.1	-5.8	2.3	-1.2
February 3rd	Marino Rocks	71	3:35pm	4 hours	24	0	Bembicium nanum	Dry	35.1	Centre	Depression	39.2	Edge	West	31.9	Flat	East	35.2	7.3	-4.1	3.2	-0.1
February 3rd	Marino Rocks	72	3:37pm	4 hours	24	0	Bembicium nanum	Dry	37	Centre	Flat	40.6	Edge	West	34.4	Flat	Centre	36.7	6.2	-3.6	2.6	0.3
February 3rd	Marino Rocks	73	3:39pm	4 hours	24	0	Bembicium nanum	Dry	35	Centre	Flat	41.4	Edge	East	30.2	Flat	Centre	33.9	11.2	-6.4	4.8	1.1
February 3rd	Marino Rocks	74	3:40pm	4 hours	24	0	Bembicium nanum	Dry	33.5	East	Edge	42.6	Edge	Centre	33.1	Flat	East	37.3	9.5	-9.1	0.4	-3.8
February 3rd	Marino Rocks	75	3:41pm	4 hours	24	0	Bembicium nanum	Dry	37.3	Centre	Flat	41.5	Edge	West	35.3	Flat	Centre	37.9	6.2	-4.2	2	-0.6
February 3rd	Marino Rocks	76	3:43pm	4 hours	24	0	Bembicium nanum	Dry	38.3	East	Flat	45.2	Edge	West	34.5	Edge	East	40.4	10.7	-6.9	3.8	-2.1
February 3rd	Marino Rocks	77	3:44pm	4 hours	24	0	Bembicium nanum	Dry	37	Centre	Flat	43.6	Flat	Centre	35.2	Flat	Centre	37.6	8.4	-6.6	1.8	-0.6
February 3rd	Marino Rocks	78	3:45pm	4 hours	24	0	Bembicium nanum	Dry	37.5	Centre	Edge	40.8	Edge	East	34.8	Edge	Centre	37.3	6	-3.3	2.7	0.2
February 3rd	Marino Rocks	79	3:48pm	4 hours	24	0	Bembicium nanum	Dry	38	Centre	Flat	41.8	Edge	Centre	34.8	Flat	East	37.3	7	-3.8	3.2	0.7
February 3rd	Marino Rocks	80	3:49pm	4 hours	24	0	Bembicium nanum	Dry	41.4	West	Edge	42.7	Edge	West	34.8	Edge	Centre	38.4	7.9	-1.3	6.6	3
February 3rd	Marino Rocks	81	3:51pm	4 hours	24	0	Bembicium nanum	Dry	36.2	Centre	Flat	42.3	Edge	Centre	35.3	Flat	Centre	37.6	7	-6.1	0.9	-1.4
February 3rd	Marino Rocks	82	3:52pm	4 hours	24	0	Bembicium nanum	Dry	35.8	West	Flat	39.8	Edge	West	29.8	Flat	East	33.5	10	-4	6	2.3
February 3rd	Marino Rocks	83	3:54pm	4 hours	24	0	Bembicium nanum	Dry	33	East	Edge	41.3	Depression	West	30.6	Flat	East	34.3	10.7	-8.3	2.4	-1.3
February 3rd	Marino Rocks	84	3:55pm	4 hours	24	0	Bembicium nanum	Dry	38.3	Centre	Flat	42.6	Edge	West	32.4	Edge	Centre	37.4	10.2	-4.3	5.9	0.9
February 3rd	Marino Rocks	85	3:57pm	4 hours	24	0	Bembicium nanum	Dry	39.3	West	Depression	42.1	Depression	West	33.9	Edge	East	36.5	8.2	-2.8	5.4	2.8
February 3rd	Marino Rocks	86	4:01pm	4 hours	24	0	Bembicium nanum	Dry	32.8	Centre	Flat	37.9	Edge	East	27.8	Flat	Centre	33.6	10.1	-5.1	5	-0.8
February 3rd	Marino Rocks	87	4:04pm	4 hours	24	0	Bembicium nanum	Dry	31.7	Centre	Flat	39.8	Edge	Centre	29.8	Flat	East	33.3	10	-8.1	1.9	-1.6
February 3rd	Marino Rocks	88	4:05pm	4 hours	24	0	Bembicium nanum	Dry	32.3	West	Flat	38.9	Edge	Centre	30.8	Flat	Centre	33.1	8.1	-6.6	1.5	-0.8
February 3rd	Marino Rocks	89	4:09pm	4 hours	24	0	Bembicium nanum	Dry	37.7	West	Drop	40.8	Edge	West	31.9	Flat	East	35.3	8.9	-3.1	5.8	2.4
February 3rd	Marino Rocks	90	4:12pm	4 hours	24	0	Bembicium nanum	Dry	32.8	Centre	Edge	37.5	Edge	West	31.1	Flat	Centre	32.8	6.4	-4.7	1.7	0
February 10th	Marino Rocks	1	10:15am	1 hour	27	0	Nerita atramentosa	Wet	25	Centre	Flat	26.6	Edge	East	24.4	Flat	Centre	25.5	2.2	-1.6	0.6	-0.5
February 10th	Marino Rocks	2	10:19am	1 hour	27	0	Nerita atramentosa	Wet	26.3	East	Edge	27.4	Edge	West	25.3	Flat	Centre	26.2	2.1	-1.1	1	0.1
February 10th	Marino Rocks	3	10:21am	1 hour	27	0	Nerita atramentosa	Wet	25	Centre	Flat	28.8	Edge	East	24.6	Flat	Centre	25.8	4.2	-3.8	0.4	-0.8
February 10th	Marino Rocks	4	10:22am	1 hour	27	0	Nerita atramentosa	Wet	26.2	Centre	Flat	28.7	Edge	West	25.1	Flat	Centre	26.3	3.6	-2.5	1.1	-0.1
February 10th	Marino Rocks	5	10:23am	1 hour	27	0	Nerita atramentosa	Wet	26.7	West	Flat	28.8	Edge	East	25.4	Flat	Centre	26.8	3.4	-2.1	1.3	-0.1
February 10th	Marino Rocks	6	10:25am	1 hour	27	0	Nerita atramentosa	Wet	26.5	West	Flat	29.4	Edge	East	25.3	Flat	Centre	26.9	4.1	-2.9	1.2	-0.4
February 10th	Marino Rocks	7	10:29am	1 hour	27	0	Nerita atramentosa	Wet	26.1	West	Flat	29.9	Edge	East	24.8	Flat	Centre	26.6	5.1	-3.8	1.3	-0.5
February 10th	Marino Rocks	8	10:33am	1 hour	27	0	Nerita atramentosa	Wet	27.7	Centre	Flat	31.7	Edge	East	26.1	Flat	Centre	27.9	5.6	-4	1.6	-0.2
February 10th	Marino Rocks	9	10:34am	1 hour	27	0	Nerita atramentosa	Wet	27.3	West	Edge	29.6	Edge	East	26.3	Flat	Centre	27.6	3.3	-2.3	1	-0.3
February 10th	Marino Rocks	10	10:35am	1 hour	27	0	Nerita atramentosa	Dry	25.9	Centre	Flat	34.2	Edge	East	25.5	Flat	Centre	28.4	8.7	-8.3	0.4	-2.5
February 10th	Marino Rocks	11	10:36am	1 hour	27	0	Nerita atramentosa	Wet	28.1	Centre	Flat	33.9	Edge	East	26.8	Flat	West	28.4	7.1	-5.8	1.3	-0.3
February 10th	Marino Rocks	12	10:38am	1 hour	27	0	Nerita atramentosa	Wet	27.1	Centre	Edge	30.1	Edge	East	24.9	Flat	Centre	26.9	5.2	-3	2.2	0.2
February 10th	Marino Rocks	13	10:41am	1 hour	27	0	Nerita atramentosa	Wet	28.1	West	Edge	30	Edge	West	26.4	Flat	Centre	27.8	3.6	-1.9	1.7	0.3
February 10th	Marino Rocks	14	10:42am	1 hour	27	0	Nerita atramentosa	Wet	27.6	Centre	Edge	32	Edge	East	26	Flat	Centre	27.9	6	-4.4	1.6	-0.3
February 10th	Marino Rocks	15	10:43am	1 hour	27	0	Nerita atramentosa	Wet	27.2	East	Flat	31.8	Edge	East	24.4	Edge	Centre	28.2	7.4	-4.6	2.8	-1
February 10th	Marino Rocks	16	10:47am	1 hour	27	0	Nerita atramentosa	Dry	28.7	West	Edge	34.3	Edge	East	26.3	Flat	Centre	28.9	8	-5.6	2.4	-0.2
February 10th	Marino Rocks	17	10:48am	1 hour	27	0	Nerita atramentosa	Wet	28.8	Centre	Flat	35.8	Edge	East	26.8	Flat	Centre	29.2	9	-7	2	-0.4
February 10th	Marino Rocks	18	10:50am	1 hour	27	0	Nerita atramentosa	Wet	27.5	Centre	Flat	33.1	Edge	East	26.2	Flat	Centre	28.6	6.9	-5.6	1.3	-1.1
February 10th	Marino Rocks	19	10:50am	1 hour	27	0	Nerita atramentosa	Dry	30.3	West	Edge	31.8	Edge	West	25.8	Depression	Centre	28.4	6	-1.5	4.5	1.9
February 10th	Marino Rocks	20	10:52am	1 hour	27	0	Nerita atramentosa	Wet	27.1	Centre	Flat	31.5	Edge	Centre	26.4	Edge	West	28	5.1	-4.4	0.7	-0.9
February 10th	Marino Rocks	21	10:53am	1 hour	27	0	Nerita atramentosa	Wet	29.1	Centre	Flat	34.7	Edge	West	28.5	Flat	Centre	31.2	6.2	-5.6	0.6	-2.1
February 10th	Marino Rocks	22	10:54am	1 hour	27	0	Nerita atramentosa	Wet	28.2	Centre	Flat	33.3	Edge	East	26.7	Flat	Centre	29.2	6.6	-5.1	1.5	-1
February 10th	Marino Rocks	23	10:57am	1 hour	27	0	Nerita atramentosa	Wet	29.2	Centre	Flat	32.9	Edge	East	26.5	Flat	Centre	29.1	6.4	-3.7	2.7	0.1
February 10th	Marino Rocks	24	10:58am	1 hour	27	0	Nerita atramentosa	Wet	28.3	Centre	Flat	31.3	Edge	East	25.8	Flat	Centre	27.8	5.5	-3	2.5	0.5
February 10th	Marino Rocks	25	11:02am	1 hour	27	0	Nerita atramentosa	Wet	29.3	Centre	Edge	37.3	Edge	East	28.4	Flat	Centre	31.8	8.9	-8	0.9	-2.5
February 10th	Marino Rocks	26	11:15am	2 hours	29	0	Nerita atramentosa	Wet	27.3	Centre	Flat	35.9	Edge	East	26.2	Flat	Centre	28.9	9.7	-8.6	1.1	-1.6
February 10th	Marino Rocks	27	11:17am	2 hours	29	0	Nerita atramentosa	Wet	29.1	West	Edge	34.3	Edge	East	27.6	Edge	West	29.9	6.7	-5.2	1.5	-0.8
February 10th	Marino Rocks	28	11:18am	2 hours	29	0	Nerita atramentosa	Wet	26.5	Centre	Flat	31.8	Edge	West	25.2	Flat	Centre	27	6.6	-5.3	1.3	-0.5
February 10th	Marino Rocks	29	11:21am	2 hours	29	0	Nerita atramentosa	Wet	29.8	Centre	Flat	32.2	Edge	East	27.6	Flat	Centre	29.2	4.6	-2.4	2.2	0.6
February 10th	Marino Rocks	30	11:23am	2 hours	29	0	Nerita atramentosa	Wet	30.4	East	Flat	35.2	Edge	East	27.7	Flat	Centre	30.3	7.5	-4.8	2.7	0.1
February 10th	Marino Rocks	31	11:24am	2 hours	29	0	Nerita atramentosa	Wet	29.8	Centre	Edge	31.9	Edge	West	27.5	Flat	Centre	29.7	4.4	-2.1	2.3	0.1
February 10th	Marino Rocks	32	11:26am	2 hours	29	0	Nerita atramentosa	Wet	30.6	Centre	Flat	38.7	Edge	East	28	Flat	Centre	31.2	10.7	-8.1	2.6	-0.6
February 10th	Marino Rocks	33	11:26am	2 hours	29	0	Nerita atramentosa	Dry	31.4	Centre	Flat	35	Edge	East	27.8	Flat	Centre	30.6	7.2	-3.6	3.6	0.8
February 10th	Marino Rocks	34	11:28am	2 hours	29	0	Nerita atramentosa	Wet	28.5	East	Flat	34.8	Edge	Centre	26.8	Flat	Centre	29.7	8	-6.3	1.7	-1.2
February 10th	Marino Rocks	35	11:29am	2 hours	29	0	Nerita atramentosa	Wet	28.7	Centre	Flat	35.5	Edge	East	27.6	Flat	Centre	30.5	7.9	-6.8	1.1	-1.8
February 10th	Marino Rocks	36	11:32am	2 hours	29	0	Nerita atramentosa	Wet	31.3	Centre	Edge	34.2	Edge	Centre	28.6	Edge	East	31.3	5.6	-2.9	2.7	0
February 10th	Marino Rocks	37	11:35am	2 hours	29	0	Nerita atramentosa	Wet	29.7	East	Depression	34	Edge	Centre	28.2	Flat	Centre	30.3	5.8	-4.3	1.5	-0.6
February 10th	Marino Rocks	38	11:36am	2 hours	29	0	Nerita atramentosa	Wet	30.9	Centre	Flat	37.8	Edge	East	27.4	Flat	Centre	30.8	10.4	-6.9	3.5	0.1
February 10th	Marino Rocks	39	11:38am	2 hours	29	0	Nerita atramentosa	Wet	30.8	West	Edge	33	Edge	Centre	29	Flat	Centre	30.6	4	-2.2	1.8	0.2
February 10th	Marino Rocks	40	11:39am	2 hours	29	0	Nerita atramentosa	Wet	29.9	West	Edge	31.1	Edge	West	26.9	Flat	Centre	28.8	4.2	-1.2	3	1.1
February 10th	Marino Rocks	41	11:40am	2 hours	29	0	Nerita atramentosa	Wet	27.5	East	Edge	31.8	Edge	West	27.3	Flat	Centre	29.2	4.5	-4.3	0.2	-1.7
February 10th	Marino Rocks	42	11:41am	2 hours	29	0	Nerita atramentosa	Wet	28.4	Centre	Flat	34.2	Edge	East	26.8	Flat	Centre	29.9	7.4	-5.8	1.6	-1.5
February 10th	Marino Rocks	43	11:42am	2 hours	29	0	Nerita atramentosa	Wet	30.7	Centre	Flat	38.8	Edge	West	29	Edge	East	33.3	9.8	-8.1	1.7	-2.6
February 10th	Marino Rocks	45	11:46am	2 hours	29	0	Nerita atramentosa	Wet	32.7	West	Edge	39	Edge	West	31.5	Flat	Centre	34.5	7.5	-6.3	1.2	-1.8
February 10th	Marino Rocks	46	11:49am	2 hours	29	0	Nerita atramentosa	Wet	30.9	Centre	Drop	35.6	Edge	Centre	29.5	Flat	Centre	31.7	6.1	-4.7	1.4	-0.8
February 10th	Marino Rocks	47	11:50am	2 hours	29	0	Nerita atramentosa	Dry	33.5	Centre	Flat	42.6	Edge	East	31.8	Depression	East	35.1	10.8	-9.1	1.7	-1.6
February 10th	Marino Rocks	48	11:54am	2 hours	29	0	Nerita atramentosa	Wet	30.2	West	Flat	35.6	Edge	West	29.7	Flat	Centre	31.5	5.9	-5.4	0.5	-1.3
February 10th	Marino Rocks	49	11:57am	2 hours	29	0	Nerita atramentosa	Dry	31.9	Centre	Flat	40	Edge	East	30.5	Flat	West	33.6	9.5	-8.1	1.4	-1.7
February 10th	Marino Rocks	50	12:00pm	2 hours	29	0	Nerita atramentosa	Wet	32.5	West	Edge	38.9	Edge	East	29.6	Edge	East	33.6	9.3	-6.4	2.9	-1.1
February 10th	Marino Rocks	51	12:01pm	2 hours	29	0	Nerita atramentosa	Wet	31.9	East	Edge	38.3	Edge	Centre	28.8	Edge	West	32.2	9.5	-6.4	3.1	-0.3
February 10th	Marino Rocks	52	12:02pm	2 hours	29	0	Nerita atramentosa	Wet	30.9	Centre	Flat	33.5	Edge	East	28.4	Flat	Centre	30.5	5.1	-2.6	2.5	0.4
February 10th	Marino Rocks	53	1:10pm	4 hours	32	0	Nerita atramentosa	Wet	34.4	Centre	Flat	46.7	Edge	West	33.1	Edge	East	38.3	13.6	-12.3	1.3	-3.9
February 10th	Marino Rocks	54	1:11pm	4 hours	32	0	Nerita atramentosa	Wet	32.1	East	Flat	37.8	Edge	West	31.3	Edge	East	33.4	6.5	-5.7	0.8	-1.3
February 10th	Marino Rocks	55	1:12pm	4 hours	32	0	Nerita atramentosa	Dry	32.7	East	Flat	41.7	Edge	Centre	32	Flat	Centre	35.7	9.7	-9	0.7	-3
February 10th	Marino Rocks	56	1:13pm	4 hours	32	0	Nerita atramentosa	Dry	34.3	Centre	Flat	42.8	Edge	Centre	34.1	Flat	Centre	37.6	8.7	-8.5	0.2	-3.3
February 10th	Marino Rocks	57	1:14pm	4 hours	32	0	Nerita atramentosa	Wet	34.8	West	Depression	38.7	Depression	Centre	30.3	Flat	Centre	33.1	8.4	-3.9	4.5	1.7
February 10th	Marino Rocks	58	1:16pm	4 hours	32	0	Nerita atramentosa	Dry	31.7	West	Flat	40.6	Edge	East	30.4	Flat	West	35.2	10.2	-8.9	1.3	-3.5
February 10th	Marino Rocks	59	1:17pm	4 hours	32	0	Nerita atramentosa	Wet	31.5	East	Flat	40.8	Edge	West	29.2	Flat	East	34.3	11.6	-9.3	2.3	-2.8
February 10th	Marino Rocks	60	1:19pm	4 hours	32	0	Nerita atramentosa	Wet	32.5	West	Edge	38.7	Edge	East	30.6	Edge	West	34	8.1	-6.2	1.9	-1.5
February 10th	Marino Rocks	61	1:22pm	4 hours	32	0	Nerita atramentosa	Wet	30.7	East	Flat	40.3	Edge	Centre	30.4	Flat	Centre	35.1	9.9	-9.6	0.3	-4.4
February 10th	Marino Rocks	62	1:24pm	4 hours	32	0	Nerita atramentosa	Dry	33	East	Flat	37.1	Edge	West	31.3	Flat	East	33.8	5.8	-4.1	1.7	-0.8
February 10th	Marino Rocks	63	1:26pm	4 hours	32	0	Nerita atramentosa	Dry	33.1	Centre	Flat	39.1	Edge	West	30.7	Flat	Centre	34.3	8.4	-6	2.4	-1.2
February 10th	Marino Rocks	64	1:27pm	4 hours	32	0	Nerita atramentosa	Dry	33.5	Centre	Flat	38.7	Edge	Centre	33.5	Flat	Centre	36.3	5.2	-5.2	0	-2.8
February 10th	Marino Rocks	65	1:33pm	4 hours	32	0	Nerita atramentosa	Wet	33.3	East	Flat	43.3	Edge	West	32.8	Flat	East	37.7	10.5	-10	0.5	-4.4
February 10th	Marino Rocks	66	1:35pm	4 hours	32	0	Nerita atramentosa	Wet	32	East	Edge	44.6	Edge	West	31.8	Edge	East	37.6	12.8	-12.6	0.2	-5.6
February 10th	Marino Rocks	67	1:37pm	4 hours	32	0	Nerita atramentosa	Wet	31.9	West	Flat	43.3	Edge	West	30	Flat	Centre	35.4	13.3	-11.4	1.9	-3.5
February 10th	Marino Rocks	68	1:41pm	4 hours	32	0	Nerita atramentosa	Wet	34.4	East	Flat	41.3	Peak	West	33.6	Edge	East	37.2	7.7	-6.9	0.8	-2.8
February 10th	Marino Rocks	69	1:42pm	4 hours	32	0	Nerita atramentosa	Dry	33.9	West	Flat	38.9	Edge	East	32.6	Flat	West	35	6.3	-5	1.3	-1.1
February 10th	Marino Rocks	70	1:43pm	4 hours	32	0	Nerita atramentosa	Wet	30.8	Centre	Flat	36.4	Edge	Centre	30.3	Flat	Centre	32.3	6.1	-5.6	0.5	-1.5
February 10th	Marino Rocks	71	1:44pm	4 hours	32	0	Nerita atramentosa	Wet	35.4	Centre	Flat	39.5	Edge	East	32.8	Flat	Centre	34.7	6.7	-4.1	2.6	0.7
February 10th	Marino Rocks	72	1:46pm	4 hours	32	0	Nerita atramentosa	Wet	35.3	Centre	Flat	41.8	Edge	West	30.7	Edge	East	35.8	11.1	-6.5	4.6	-0.5
February 10th	Marino Rocks	73	1:48pm	4 hours	32	0	Nerita atramentosa	Dry	32.5	West	Edge	37.7	Edge	East	30.3	Flat	Centre	32.9	7.4	-5.2	2.2	-0.4
February 10th	Marino Rocks	74	1:49pm	4 hours	32	0	Nerita atramentosa	Dry	34.5	East	Edge	43.6	Edge	Centre	32.8	Flat	East	38.5	10.8	-9.1	1.7	-4
February 10th	Marino Rocks	75	1:50pm	4 hours	32	0	Nerita atramentosa	Dry	35.8	Centre	Flat	42.6	Edge	West	32.9	Flat	East	37.7	9.7	-6.8	2.9	-1.9
February 10th	Marino Rocks	76	1:54pm	4 hours	32	0	Nerita atramentosa	Wet	35.2	Centre	Peak	41	Edge	West	33.2	Peak	Centre	36.7	7.8	-5.8	2	-1.5
February 10th	Marino Rocks	77	1:57pm	4 hours	32	0	Nerita atramentosa	Wet	34.4	East	Edge	36.8	Edge	Centre	30.6	Flat	Centre	33.2	6.2	-2.4	3.8	1.2
February 10th	Marino Rocks	78	1:59pm	4 hours	32	0	Nerita atramentosa	Dry	38.2	Centre	Flat	44.1	Edge	West	36.6	Flat	East	39.5	7.5	-5.9	1.6	-1.3
February 10th	Marino Rocks	79	2:00pm	4 hours	32	0	Nerita atramentosa	Wet	33.2	Centre	Flat	36.7	Edge	West	32.5	Flat	Centre	34.1	4.2	-3.5	0.7	-0.9
February 10th	Marino Rocks	80	2:02pm	4 hours	32	0	Nerita atramentosa	Dry	36.3	East	Edge	43.4	Edge	West	34.6	Edge	East	38.6	8.8	-7.1	1.7	-2.3
February 10th	Marino Rocks	81	2:05pm	4 hours	32	0	Nerita atramentosa	Dry	35.8	Centre	Flat	43.4	Edge	West	31.7	Edge	East	37.5	11.7	-7.6	4.1	-1.7
February 10th	Marino Rocks	82	2:03pm	4 hours	32	0	Nerita atramentosa	Dry	35.4	Centre	Flat	40.1	Edge	West	33.4	Flat	Centre	36.8	6.7	-4.7	2	-1.4
February 14th	Marino Rocks	1	11:05am	1 hour	22	0	Nerita atramentosa	Wet	22.1	East	Edge	24.5	Flat	Centre	21.1	Flat	Centre	22.7	3.4	-2.4	1	-0.6
February 14th	Marino Rocks	2	11:07am	1 hour	22	0	Nerita atramentosa	Wet	22.6	Centre	Flat	27.1	Flat	East	21.1	Flat	Centre	22.8	6	-4.5	1.5	-0.2
February 14th	Marino Rocks	3	11:09am	1 hour	22	0	Nerita atramentosa	Wet	23.2	West	Flat	29.3	Edge	East	20.8	Flat	Centre	23.4	8.5	-6.1	2.4	-0.2
February 14th	Marino Rocks	4	11:10am	1 hour	22	0	Nerita atramentosa	Wet	25.2	Centre	Flat	27.4	Depression	Centre	23.4	Flat	Centre	25.3	4	-2.2	1.8	-0.1
February 14th	Marino Rocks	5	11:11am	1 hour	22	0	Nerita atramentosa	Wet	23.6	Centre	Flat	26.7	Edge	East	22.1	Flat	Centre	24	4.6	-3.1	1.5	-0.4
February 14th	Marino Rocks	6	11:16am	1 hour	22	0	Nerita atramentosa	Wet	25.1	Centre	Flat	26.7	Edge	West	22.7	Edge	East	24.5	4	-1.6	2.4	0.6
February 14th	Marino Rocks	7	11:18am	1 hour	22	0	Nerita atramentosa	Wet	23.2	Centre	Flat	24.9	Edge	West	22.4	Flat	Centre	23.2	2.5	-1.7	0.8	0
February 14th	Marino Rocks	8	11:20am	1 hour	22	0	Nerita atramentosa	Wet	23.1	Centre	Flat	28.7	Edge	West	21.7	Flat	Centre	24.2	7	-5.6	1.4	-1.1
February 14th	Marino Rocks	9	11:22am	1 hour	22	0	Nerita atramentosa	Wet	25.8	Centre	Flat	30.2	Edge	East	22.8	Flat	Centre	26	7.4	-4.4	3	-0.2
February 14th	Marino Rocks	10	11:23am	1 hour	22	0	Nerita atramentosa	Wet	23.9	Centre	Flat	27.1	Edge	East	22.4	Edge	West	24.2	4.7	-3.2	1.5	-0.3
February 14th	Marino Rocks	11	11:24am	1 hour	22	0	Nerita atramentosa	Wet	24.7	Centre	Flat	30	Edge	Centre	22.9	Edge	Centre	26	7.1	-5.3	1.8	-1.3
February 14th	Marino Rocks	12	11:26am	1 hour	22	0	Nerita atramentosa	Wet	24.9	Centre	Flat	28	Edge	East	22.5	Flat	Centre	25	5.5	-3.1	2.4	-0.1
February 14th	Marino Rocks	13	11:28am	1 hour	22	0	Nerita atramentosa	Wet	25.3	Centre	Flat	28.9	Edge	Centre	24.3	Flat	Centre	26	4.6	-3.6	1	-0.7
February 14th	Marino Rocks	14	11:29am	1 hour	22	0	Nerita atramentosa	Wet	24.4	East	Flat	29.8	Edge	Centre	23.9	Edge	West	26.3	5.9	-5.4	0.5	-1.9
February 14th	Marino Rocks	15	11:31am	1 hour	22	0	Nerita atramentosa	Wet	26	Centre	Edge	30.9	Edge	East	24.4	Edge	West	26.7	6.5	-4.9	1.6	-0.7
February 14th	Marino Rocks	16	11:31am	1 hour	22	0	Nerita atramentosa	Wet	23	Centre	Flat	30.2	Edge	East	21.1	Flat	Centre	24.2	9.1	-7.2	1.9	-1.2
February 14th	Marino Rocks	17	11:32am	1 hour	22	0	Nerita atramentosa	Dry	24	Centre	Edge	28.4	Edge	East	22.4	Flat	Centre	24.7	6	-4.4	1.6	-0.7
February 14th	Marino Rocks	18	11:36am	1 hour	22	0	Nerita atramentosa	Wet	26.4	Centre	Flat	31	Edge	Centre	23.4	Flat	West	26.6	7.6	-4.6	3	-0.2
February 14th	Marino Rocks	19	11:37am	1 hour	22	0	Nerita atramentosa	Wet	29.6	Centre	Flat	37.2	Edge	Centre	27.8	Flat	Centre	31.2	9.4	-7.6	1.8	-1.6
February 14th	Marino Rocks	20	11:38am	1 hour	22	0	Nerita atramentosa	Wet	25.1	West	Flat	30.4	Edge	East	24.3	Flat	Centre	26.5	6.1	-5.3	0.8	-1.4
February 14th	Marino Rocks	21	11:40am	1 hour	22	0	Nerita atramentosa	Wet	27	Centre	Flat	34.9	Edge	Centre	25.4	Flat	West	28.9	9.5	-7.9	1.6	-1.9
February 14th	Marino Rocks	22	11:41am	1 hour	22	0	Nerita atramentosa	Wet	25	Centre	Flat	27.3	Edge	East	22.2	Flat	Centre	24.4	5.1	-2.3	2.8	0.6
February 14th	Marino Rocks	23	11:43am	1 hour	22	0	Nerita atramentosa	Wet	26.6	East	Drop	32.8	Edge	West	25.9	Peak	East	29.3	6.9	-6.2	0.7	-2.7
February 14th	Marino Rocks	24	11:45am	1 hour	22	0	Nerita atramentosa	Wet	28	Centre	Flat	37.2	Edge	Centre	24.6	Edge	East	30.3	12.6	-9.2	3.4	-2.3
February 14th	Marino Rocks	25	11:47am	1 hour	22	0	Nerita atramentosa	Wet	25.9	East	Edge	28.5	Edge	East	23.3	Flat	Centre	25.6	5.2	-2.6	2.6	0.3
February 14th	Marino Rocks	26	11:48am	1 hour	22	0	Nerita atramentosa	Wet	27.3	Centre	Flat	31.1	Edge	East	25.1	Flat	Centre	27.6	6	-3.8	2.2	-0.3
February 14th	Marino Rocks	27	11:50am	1 hour	22	0	Nerita atramentosa	Wet	26.2	East	Edge	29.8	Depression	West	24.8	Flat	West	26.8	5	-3.6	1.4	-0.6
February 14th	Marino Rocks	28	11:51am	1 hour	22	0	Nerita atramentosa	Wet	26.1	Centre	Flat	31.3	Edge	East	23.9	Flat	Centre	27	7.4	-5.2	2.2	-0.9
February 14th	Marino Rocks	29	11:53am	1 hour	22	0	Nerita atramentosa	Wet	29.9	East	Flat	31.8	Edge	Centre	27.8	Flat	Centre	29.9	4	-1.9	2.1	0
February 14th	Marino Rocks	30	11:54am	1 hour	22	0	Nerita atramentosa	Wet	31.1	West	Edge	33.2	Edge	West	27.3	Edge	East	30.2	5.9	-2.1	3.8	0.9
February 14th	Marino Rocks	31	12:09pm	2 Hours	23	0	Nerita atramentosa	Dry	27	Centre	Flat	35.1	Edge	East	24.7	Flat	West	29.3	10.4	-8.1	2.3	-2.3
February 14th	Marino Rocks	32	12:10pm	2 Hours	23	0	Nerita atramentosa	Wet	27.7	Centre	Flat	33.3	Edge	Centre	24.6	Flat	Centre	28.3	8.7	-5.6	3.1	-0.6
February 14th	Marino Rocks	34	12:14pm	2 Hours	23	0	Nerita atramentosa	Wet	26	Centre	Flat	28.7	Edge	West	25	Flat	Centre	26.3	3.7	-2.7	1	-0.3
February 14th	Marino Rocks	35	12:15pm	2 Hours	23	0	Nerita atramentosa	Wet	27.8	Centre	Flat	31.1	Edge	Centre	26.5	Flat	Centre	28.5	4.6	-3.3	1.3	-0.7
February 14th	Marino Rocks	36	12:16pm	2 Hours	23	0	Nerita atramentosa	Wet	31.5	Centre	Flat	39.2	Depression	East	29.5	Edge	West	32.4	9.7	-7.7	2	-0.9
February 14th	Marino Rocks	37	12:18pm	2 Hours	23	0	Nerita atramentosa	Wet	27.5	Centre	Edge	29.3	Edge	East	23.2	Flat	Centre	26.1	6.1	-1.8	4.3	1.4
February 14th	Marino Rocks	39	12:20pm	2 Hours	23	0	Nerita atramentosa	Wet	27.8	East	Flat	30.8	Edge	West	26.3	Flat	Centre	27.9	4.5	-3	1.5	-0.1
February 14th	Marino Rocks	40	12:22pm	2 Hours	23	0	Nerita atramentosa	Wet	27.3	East	Flat	31.2	Edge	West	26.8	Flat	East	28.9	4.4	-3.9	0.5	-1.6
February 14th	Marino Rocks	41	12:23pm	2 Hours	23	0	Nerita atramentosa	Wet	26.9	East	Edge	30.6	Edge	West	25.9	Flat	Centre	27.9	4.7	-3.7	1	-1
February 14th	Marino Rocks	42	12:24pm	2 Hours	23	0	Nerita atramentosa	Wet	25.9	West	Edge	31.2	Edge	Centre	23.5	Edge	West	27.2	7.7	-5.3	2.4	-1.3
February 14th	Marino Rocks	43	12:25pm	2 Hours	23	0	Nerita atramentosa	Wet	30.3	Centre	Flat	33	Edge	Centre	26.3	Edge	Centre	29.5	6.7	-2.7	4	0.8
February 14th	Marino Rocks	44	12:26pm	2 Hours	23	0	Nerita atramentosa	Wet	27.1	Centre	Flat	33.3	Edge	East	25.8	Flat	Centre	29	7.5	-6.2	1.3	-1.9
February 14th	Marino Rocks	45	12:28pm	2 Hours	23	0	Nerita atramentosa	Dry	27.9	East	Flat	31.7	Edge	West	24.3	Flat	Centre	26.9	7.4	-3.8	3.6	1
February 14th	Marino Rocks	46	12:31pm	2 Hours	23	0	Nerita atramentosa	Dry	28.3	West	Flat	33.2	Edge	Centre	27.9	Flat	Centre	29.8	5.3	-4.9	0.4	-1.5
February 14th	Marino Rocks	47	12:31pm	2 Hours	23	0	Nerita atramentosa	Wet	30.8	Centre	Flat	38.1	Edge	East	28.1	Flat	West	31.8	10	-7.3	2.7	-1
February 14th	Marino Rocks	48	12:33pm	2 Hours	23	0	Nerita atramentosa	Wet	30.8	West	Flat	34.2	Edge	East	28.4	Flat	Centre	30.6	5.8	-3.4	2.4	0.2
February 14th	Marino Rocks	49	12:34pm	2 Hours	23	0	Nerita atramentosa	Dry	28.3	Centre	Flat	33.5	Edge	Centre	26.7	Flat	Centre	29.9	6.8	-5.2	1.6	-1.6
February 14th	Marino Rocks	50	12:36pm	2 Hours	23	0	Nerita atramentosa	Dry	27.7	Centre	Flat	33.1	Edge	East	25.8	Flat	Centre	29.3	7.3	-5.4	1.9	-1.6
February 14th	Marino Rocks	51	12:37pm	2 Hours	23	0	Nerita atramentosa	Wet	31.2	Centre	Flat	38.3	Edge	East	30.1	Flat	Centre	33	8.2	-7.1	1.1	-1.8
February 14th	Marino Rocks	52	12:40pm	2 Hours	23	0	Nerita atramentosa	Wet	32.2	West	Edge	35.4	Flat	East	30.3	Peak	Centre	32.6	5.1	-3.2	1.9	-0.4
February 14th	Marino Rocks	53	12:42pm	2 Hours	23	0	Nerita atramentosa	Wet	32.7	East	Flat	35.7	Edge	West	28.5	Peak	East	31.8	7.2	-3	4.2	0.9
February 14th	Marino Rocks	54	12:43pm	2 Hours	23	0	Nerita atramentosa	Wet	29	Centre	Flat	38.1	Edge	East	27.8	Flat	Centre	32	10.3	-9.1	1.2	-3
February 14th	Marino Rocks	55	12:44pm	2 Hours	23	0	Nerita atramentosa	Wet	27.7	Centre	Flat	35.6	Edge	East	27.3	Flat	Centre	30.6	8.3	-7.9	0.4	-2.9
February 14th	Marino Rocks	56	12:46pm	2 Hours	23	0	Nerita atramentosa	Wet	28.8	Centre	Flat	32.6	Edge	West	27.7	Flat	Centre	29.5	4.9	-3.8	1.1	-0.7
February 14th	Marino Rocks	57	12:48pm	2 Hours	23	0	Nerita atramentosa	Wet	28.3	Centre	Flat	36.5	Edge	Centre	26.2	Peak	Centre	30	10.3	-8.2	2.1	-1.7
February 14th	Marino Rocks	58	12:49pm	2 Hours	23	0	Nerita atramentosa	Wet	31.5	Centre	Flat	37.5	Edge	West	28.9	Edge	East	32.3	8.6	-6	2.6	-0.8
February 14th	Marino Rocks	59	12:50pm	2 Hours	23	0	Nerita atramentosa	Wet	30.3	Centre	Flat	34.2	Edge	Centre	27.4	Edge	Centre	30.5	6.8	-3.9	2.9	-0.2
February 14th	Marino Rocks	60	12:51pm	2 Hours	23	0	Nerita atramentosa	Dry	30.4	Centre	Flat	35.1	Edge	West	28.7	Flat	Centre	31.7	6.4	-4.7	1.7	-1.3
February 14th	Marino Rocks	61	12:52pm	2 Hours	23	0	Nerita atramentosa	Wet	29	Centre	Flat	35.2	Edge	Centre	27.8	Flat	East	30.9	7.4	-6.2	1.2	-1.9
February 14th	Marino Rocks	62	12:52pm	2 Hours	23	0	Nerita atramentosa	Dry	26.5	East	Edge	29	Edge	Centre	23	Flat	Centre	25.2	6	-2.5	3.5	1.3
February 14th	Marino Rocks	66	1:47pm	4 Hours	25	2	Nerita atramentosa	Dry	29.4	Centre	Flat	34.4	Edge	Centre	28.4	Flat	East	30.5	6	-5	1	-1.1
February 14th	Marino Rocks	67	1:48pm	4 Hours	25	2	Nerita atramentosa	Dry	31.6	Centre	Edge	37	Edge	West	29.5	Flat	East	32.1	7.5	-5.4	2.1	-0.5
February 14th	Marino Rocks	68	1:50pm	4 Hours	25	2	Nerita atramentosa	Wet	30.8	Centre	Depression	38.2	Edge	West	24.8	Flat	Centre	30.2	13.4	-7.4	6	0.6
February 14th	Marino Rocks	69	1:52pm	4 Hours	25	2	Nerita atramentosa	Dry	31.2	Centre	Edge	37.8	Edge	West	28.6	Flat	Centre	32.6	9.2	-6.6	2.6	-1.4
February 14th	Marino Rocks	70	1:54pm	4 Hours	25	2	Nerita atramentosa	Dry	31.5	Centre	Flat	35.1	Edge	East	29.4	Flat	Centre	32.3	5.7	-3.6	2.1	-0.8
February 14th	Marino Rocks	71	1:56pm	4 Hours	25	2	Nerita atramentosa	Dry	29.1	Centre	Flat	34.8	Edge	Centre	26.9	Flat	Centre	29.4	7.9	-5.7	2.2	-0.3
February 14th	Marino Rocks	72	1:58pm	4 Hours	25	2	Nerita atramentosa	Dry	35	West	Flat	39.5	Flat	Centre	32.6	Flat	West	36.1	6.9	-4.5	2.4	-1.1
February 14th	Marino Rocks	73	1:59pm	4 Hours	25	2	Nerita atramentosa	Wet	30.2	East	Flat	32.5	Edge	West	26.7	Flat	Centre	29.3	5.8	-2.3	3.5	0.9
February 14th	Marino Rocks	74	2:00pm	4 Hours	25	2	Nerita atramentosa	Dry	32.2	Centre	Flat	38.2	Edge	Centre	30.3	Flat	East	33.4	7.9	-6	1.9	-1.2
February 14th	Marino Rocks	75	2:02pm	4 Hours	25	2	Nerita atramentosa	Dry	31.7	Centre	Flat	36.6	Edge	West	28.6	Flat	Centre	32.1	8	-4.9	3.1	-0.4
February 14th	Marino Rocks	76	2:04pm	4 Hours	25	2	Nerita atramentosa	Dry	30.3	East	Flat	35.4	Edge	Centre	29	Edge	East	31.8	6.4	-5.1	1.3	-1.5
February 14th	Marino Rocks	77	2:06pm	4 Hours	25	2	Nerita atramentosa	Dry	30.7	Centre	Flat	35.4	Edge	West	29.8	Flat	Centre	32.1	5.6	-4.7	0.9	-1.4
February 14th	Marino Rocks	78	2:07pm	4 Hours	25	2	Nerita atramentosa	Wet	31.2	East	Edge	36	Edge	West	28.2	Peak	West	31.9	7.8	-4.8	3	-0.7
February 14th	Marino Rocks	79	2:09pm	4 Hours	25	2	Nerita atramentosa	Wet	30.2	Centre	Flat	37	Edge	East	28.4	Flat	West	31.9	8.6	-6.8	1.8	-1.7
February 14th	Marino Rocks	80	2:10pm	4 Hours	25	2	Nerita atramentosa	Dry	31.9	Centre	Flat	36.6	Edge	Centre	28.4	Flat	Centre	32.3	8.2	-4.7	3.5	-0.4
February 14th	Marino Rocks	81	2:12pm	4 Hours	25	2	Nerita atramentosa	Wet	30.6	East	Edge	39.9	Edge	West	29	Edge	East	33.7	10.9	-9.3	1.6	-3.1
February 14th	Marino Rocks	82	2:13pm	4 Hours	25	2	Nerita atramentosa	Wet	33.9	Centre	Flat	38.1	Edge	West	30.9	Flat	Centre	33.8	7.2	-4.2	3	0.1
February 14th	Marino Rocks	83	2:15pm	4 Hours	25	2	Nerita atramentosa	Wet	32.7	Centre	Flat	39.4	Edge	West	27.2	Edge	Centre	33.8	12.2	-6.7	5.5	-1.1
February 14th	Marino Rocks	84	2:17pm	4 Hours	25	2	Nerita atramentosa	Wet	33.4	Centre	Flat	39.8	Edge	Centre	28.3	Flat	Centre	33.5	11.5	-6.4	5.1	-0.1
February 14th	Marino Rocks	85	2:19pm	4 Hours	25	2	Nerita atramentosa	Dry	31.3	Centre	Flat	37.7	Edge	West	28.7	Flat	East	32.3	9	-6.4	2.6	-1
February 14th	Marino Rocks	86	2:20pm	4 Hours	25	2	Nerita atramentosa	Wet	36.2	Centre	Edge	38	Edge	West	32.5	Flat	Centre	35	5.5	-1.8	3.7	1.2
February 14th	Marino Rocks	87	2:22pm	4 Hours	25	2	Nerita atramentosa	Dry	29.2	Centre	Flat	39.1	Edge	Centre	27.4	Flat	Centre	32.6	11.7	-9.9	1.8	-3.4
February 14th	Marino Rocks	88	2:23pm	4 Hours	25	2	Nerita atramentosa	Dry	31.4	Centre	Flat	36.5	Edge	West	27.6	Flat	East	31.8	8.9	-5.1	3.8	-0.4
February 14th	Marino Rocks	89	2:25pm	4 Hours	25	2	Nerita atramentosa	Dry	32.8	Centre	Flat	38.2	Edge	West	31.1	Flat	Centre	33.5	7.1	-5.4	1.7	-0.7
February 14th	Marino Rocks	90	2:26pm	4 Hours	25	2	Nerita atramentosa	Wet	31.7	East	Flat	35.7	Edge	West	30.8	Flat	Centre	32.4	4.9	-4	0.9	-0.7
February 14th	Marino Rocks	91	2:28pm	4 Hours	25	2	Nerita atramentosa	Dry	32.8	Centre	Flat	41.2	Edge	West	32.2	Flat	Centre	34.8	9	-8.4	0.6	-2
February 14th	Marino Rocks	92	2:31pm	4 Hours	25	2	Nerita atramentosa	Wet	29.9	East	Edge	36.2	Edge	West	27.8	Flat	Centre	31.2	8.4	-6.3	2.1	-1.3
February 14th	Marino Rocks	93	2:32pm	4 Hours	25	2	Nerita atramentosa	Dry	32.6	Centre	Flat	37.2	Edge	West	28	Peak	East	33.3	9.2	-4.6	4.6	-0.7
February 14th	Marino Rocks	94	2:34pm	4 Hours	25	2	Nerita atramentosa	Dry	31.3	East	Flat	38.1	Edge	Centre	27.6	Flat	East	32.7	10.5	-6.8	3.7	-1.4
February 14th	Marino Rocks	95	2:36pm	4 Hours	25	2	Nerita atramentosa	Dry	32.1	Centre	Flat	36	Edge	Centre	30.3	Flat	Centre	33	5.7	-3.9	1.8	-0.9
February 28th	Marino Rocks	1	9:40am	1 hour	29	0	Bembicium nanum	Dry	24.7	East	Flat	28.8	Edge	East	20.5	Edge	West	23.3	8.3	-4.1	4.2	1.4
February 28th	Marino Rocks	2	9:43am	1 hour	29	0	Bembicium nanum	Dry	24.1	Centre	Flat	30.3	Edge	East	21.1	Flat	Centre	24	9.2	-6.2	3	0.1
February 28th	Marino Rocks	3	9:44am	1 hour	29	0	Bembicium nanum	Wet	24.3	Centre	Flat	31.5	Edge	East	22.3	Flat	Centre	25.2	9.2	-7.2	2	-0.9
February 28th	Marino Rocks	4	9:46am	1 hour	29	0	Bembicium nanum	Wet	22	Centre	Flat	27.1	Edge	East	21.1	Flat	Centre	23	6	-5.1	0.9	-1
February 28th	Marino Rocks	5	9:47am	1 hour	29	0	Bembicium nanum	Dry	21.8	Centre	Flat	29.2	Edge	East	21.1	Flat	Centre	23.8	8.1	-7.4	0.7	-2
February 28th	Marino Rocks	6	9:49am	1 hour	29	0	Bembicium nanum	Wet	23	West	Flat	27.8	Edge	East	22.3	Flat	West	24.1	5.5	-4.8	0.7	-1.1
February 28th	Marino Rocks	7	9:50am	1 hour	29	0	Bembicium nanum	Wet	24.8	Centre	Depression	27.1	Edge	East	21.5	Edge	West	23.7	5.6	-2.3	3.3	1.1
February 28th	Marino Rocks	8	9:51am	1 hour	29	0	Bembicium nanum	Dry	27.9	Centre	Flat	30.3	Edge	Centre	24.9	Flat	Centre	26.9	5.4	-2.4	3	1
February 28th	Marino Rocks	9	9:57am	1 hour	29	0	Bembicium nanum	Wet	25.5	East	Flat	30.1	Edge	East	22	Edge	West	24.2	8.1	-4.6	3.5	1.3
February 28th	Marino Rocks	10	10:01am	1 hour	29	0	Bembicium nanum	Wet	24.4	Centre	Edge	29.6	Edge	Centre	23.5	Flat	Centre	25.5	6.1	-5.2	0.9	-1.1
February 28th	Marino Rocks	11	10:03am	1 hour	29	0	Bembicium nanum	Wet	24.1	East	Edge	26.7	Edge	East	22	Edge	West	23.3	4.7	-2.6	2.1	0.8
February 28th	Marino Rocks	12	10:05am	1 hour	29	0	Bembicium nanum	Dry	25	Centre	Edge	33.4	Edge	East	23.2	Flat	Centre	26.2	10.2	-8.4	1.8	-1.2
February 28th	Marino Rocks	13	10:06am	1 hour	29	0	Bembicium nanum	Dry	25.4	Centre	Flat	31.7	Edge	Centre	22.7	Edge	East	25.9	9	-6.3	2.7	-0.5
February 28th	Marino Rocks	14	10:08am	1 hour	29	0	Bembicium nanum	Wet	29.3	East	Edge	32.7	Edge	East	22.3	Flat	West	25.8	10.4	-3.4	7	3.5
February 28th	Marino Rocks	15	10:09am	1 hour	29	0	Bembicium nanum	Dry	26.1	Centre	Depression	32	Edge	West	24.6	Flat	Centre	27.1	7.4	-5.9	1.5	-1
February 28th	Marino Rocks	16	10:10am	1 hour	29	0	Bembicium nanum	Wet	26.4	Centre	Flat	33.9	Edge	Centre	22.2	Flat	Centre	25.3	11.7	-7.5	4.2	1.1
February 28th	Marino Rocks	17	10:11am	1 hour	29	0	Bembicium nanum	Dry	30.3	Centre	Edge	34.4	Edge	East	28.7	Flat	West	30.8	5.7	-4.1	1.6	-0.5
February 28th	Marino Rocks	18	10:12am	1 hour	29	0	Bembicium nanum	Wet	24.6	Centre	Flat	30.7	Edge	Centre	23.7	Flat	East	25.3	7	-6.1	0.9	-0.7
February 28th	Marino Rocks	19	10:14am	1 hour	29	0	Bembicium nanum	Dry	31	East	Flat	34.3	Edge	East	25.3	Flat	West	28.6	9	-3.3	5.7	2.4
February 28th	Marino Rocks	20	10:15am	1 hour	29	0	Bembicium nanum	Dry	24.4	West	Edge	31.5	Edge	East	22.9	Flat	Centre	24.7	8.6	-7.1	1.5	-0.3
February 28th	Marino Rocks	21	10:16am	1 hour	29	0	Bembicium nanum	Wet	23.8	West	Edge	33.4	Edge	East	23.4	Edge	West	27.6	10	-9.6	0.4	-3.8
February 28th	Marino Rocks	22	10:17am	1 hour	29	0	Bembicium nanum	Dry	28	West	Flat	34.7	Edge	East	24.7	Edge	West	29.6	10	-6.7	3.3	-1.6
February 28th	Marino Rocks	23	10:19am	1 hour	29	0	Bembicium nanum	Wet	26.1	Centre	Flat	29.8	Edge	East	23.3	Peak	West	25.7	6.5	-3.7	2.8	0.4
February 28th	Marino Rocks	24	10:20am	1 hour	29	0	Bembicium nanum	Wet	24.1	West	Edge	30.1	Edge	Centre	23.6	Flat	Centre	25.2	6.5	-6	0.5	-1.1
February 28th	Marino Rocks	25	10:21am	1 hour	29	0	Bembicium nanum	Wet	27.7	East	Depression	33	Edge	East	23.4	Flat	West	25.4	9.6	-5.3	4.3	2.3
February 28th	Marino Rocks	26	10:23am	1 hour	29	0	Bembicium nanum	Wet	31	Centre	Flat	36.5	Edge	East	25.5	Flat	Centre	29.8	11	-5.5	5.5	1.2
February 28th	Marino Rocks	27	10:24am	1 hour	29	0	Bembicium nanum	Dry	28.3	West	Edge	30.6	Edge	East	23.8	Flat	Centre	26.3	6.8	-2.3	4.5	2
February 28th	Marino Rocks	28	10:25am	1 hour	29	0	Bembicium nanum	Wet	30.2	East	Edge	32.9	Edge	Centre	23.8	Flat	Centre	26.2	9.1	-2.7	6.4	4
February 28th	Marino Rocks	29	10:27am	1 hour	29	0	Bembicium nanum	Wet	28.5	West	Edge	33.8	Edge	Centre	22.1	Edge	Centre	26.6	11.7	-5.3	6.4	1.9
February 28th	Marino Rocks	30	10:28am	1 hour	29	0	Bembicium nanum	Dry	30	Centre	Edge	34	Edge	West	23	Flat	Centre	25.9	11	-4	7	4.1
February 28th	Marino Rocks	31	10:40am	2 Hours	30	0	Bembicium nanum	Dry	24	West	Edge	30.6	Edge	East	20.4	Flat	West	23.7	10.2	-6.6	3.6	0.3
February 28th	Marino Rocks	32	10:42am	2 Hours	30	0	Bembicium nanum	Dry	30.3	West	Edge	36.5	Edge	Centre	29.7	Flat	Centre	32.1	6.8	-6.2	0.6	-1.8
February 28th	Marino Rocks	33	10:43am	2 Hours	30	0	Bembicium nanum	Wet	28	East	Flat	34	Edge	East	23.7	Edge	West	26.2	10.3	-6	4.3	1.8
February 28th	Marino Rocks	34	10:47am	2 Hours	30	0	Bembicium nanum	Dry	29.7	Centre	Flat	37.6	Edge	East	29	Flat	Centre	31.8	8.6	-7.9	0.7	-2.1
February 28th	Marino Rocks	35	10:49am	2 Hours	30	0	Bembicium nanum	Dry	32.3	West	Flat	38.7	Edge	East	31	Edge	West	33.7	7.7	-6.4	1.3	-1.4
February 28th	Marino Rocks	36	10:52am	2 Hours	30	0	Bembicium nanum	Dry	31	West	Flat	40	Edge	East	29.5	Edge	West	33.8	10.5	-9	1.5	-2.8
February 28th	Marino Rocks	37	10:55am	2 Hours	30	0	Bembicium nanum	Dry	29.3	East	Edge	34.2	Edge	West	26.3	Flat	Centre	28.8	7.9	-4.9	3	0.5
February 28th	Marino Rocks	38	10:57am	2 Hours	30	0	Bembicium nanum	Dry	30.1	Centre	Flat	35.4	Edge	Centre	28.3	Edge	East	30.8	7.1	-5.3	1.8	-0.7
February 28th	Marino Rocks	39	10:59am	2 Hours	30	0	Bembicium nanum	Dry	29.2	Centre	Flat	37.2	Edge	East	25.9	Flat	Centre	29.4	11.3	-8	3.3	-0.2
February 28th	Marino Rocks	40	11:01am	2 Hours	30	0	Bembicium nanum	Wet	27.5	West	Flat	32.5	Edge	West	26.5	Edge	Centre	28.5	6	-5	1	-1
February 28th	Marino Rocks	41	11:02am	2 Hours	30	0	Bembicium nanum	Dry	33.1	Centre	Flat	40	Edge	East	27.8	Flat	Centre	31.8	12.2	-6.9	5.3	1.3
February 28th	Marino Rocks	42	11:05am	2 Hours	30	0	Bembicium nanum	Dry	33.3	East	Flat	37.3	Edge	East	28.9	Flat	East	31.9	8.4	-4	4.4	1.4
February 28th	Marino Rocks	43	11:09am	2 Hours	30	0	Bembicium nanum	Dry	33.2	West	Edge	39.6	Edge	Centre	30.3	Flat	Centre	33.8	9.3	-6.4	2.9	-0.6
February 28th	Marino Rocks	44	11:12am	2 Hours	30	0	Bembicium nanum	Dry	35.4	Centre	Flat	41.2	Edge	East	27.6	Flat	Centre	32.9	13.6	-5.8	7.8	2.5
February 28th	Marino Rocks	45	11:14am	2 Hours	30	0	Bembicium nanum	Wet	28.8	Centre	Flat	37.3	Edge	Centre	25.5	Flat	Centre	30	11.8	-8.5	3.3	-1.2
February 28th	Marino Rocks	46	11:15am	2 Hours	30	0	Bembicium nanum	Dry	32.5	Centre	Edge	39.8	Edge	Centre	29.9	Peak	Centre	34	9.9	-7.3	2.6	-1.5
February 28th	Marino Rocks	47	11:17am	2 Hours	30	0	Bembicium nanum	Dry	33.5	East	Edge	38.2	Edge	Centre	26.1	Flat	Centre	30.2	12.1	-4.7	7.4	3.3
February 28th	Marino Rocks	48	11:18am	2 Hours	30	0	Bembicium nanum	Dry	33.9	East	Flat	38.3	Edge	East	29	Edge	West	33	9.3	-4.4	4.9	0.9
February 28th	Marino Rocks	49	11:19am	2 Hours	30	0	Bembicium nanum	Dry	28.9	Centre	Flat	34.3	Edge	West	25.2	Edge	East	29.1	9.1	-5.4	3.7	-0.2
February 28th	Marino Rocks	50	11:20am	2 Hours	30	0	Bembicium nanum	Dry	32.3	Centre	Flat	40.7	Depression	Centre	31.3	Flat	Centre	34.1	9.4	-8.4	1	-1.8
February 28th	Marino Rocks	51	11:21am	2 Hours	30	0	Bembicium nanum	Dry	32.4	East	Depression	38.9	Edge	West	31.1	Flat	Centre	33.8	7.8	-6.5	1.3	-1.4
February 28th	Marino Rocks	52	11:23am	2 Hours	30	0	Bembicium nanum	Dry	27.9	Centre	Edge	37.9	Flat	East	26.7	Edge	Centre	33.7	11.2	-10	1.2	-5.8
February 28th	Marino Rocks	53	11:24am	2 Hours	30	0	Bembicium nanum	Dry	34.6	Centre	Flat	38.8	Edge	East	28.3	Edge	Centre	32.5	10.5	-4.2	6.3	2.1
February 28th	Marino Rocks	54	11:25am	2 Hours	30	0	Bembicium nanum	Dry	34.9	West	Flat	41.9	Edge	East	34.6	Flat	West	37.3	7.3	-7	0.3	-2.4
February 28th	Marino Rocks	55	11:27am	2 Hours	30	0	Bembicium nanum	Dry	31.9	Centre	Flat	39.7	Edge	East	27.5	Flat	Centre	31.5	12.2	-7.8	4.4	0.4
February 28th	Marino Rocks	56	11:28am	2 Hours	30	0	Bembicium nanum	Wet	25.8	West	Flat	37.2	Edge	East	25.3	Edge	West	30.2	11.9	-11.4	0.5	-4.4
February 28th	Marino Rocks	57	11:29am	2 Hours	30	0	Bembicium nanum	Dry	33.5	East	Edge	36	Edge	East	26.8	Flat	Centre	29.4	9.2	-2.5	6.7	4.1
February 28th	Marino Rocks	58	11:30am	2 Hours	30	0	Bembicium nanum	Dry	33.4	Centre	Flat	38.3	Edge	East	31.6	Flat	Centre	33.1	6.7	-4.9	1.8	0.3
February 28th	Marino Rocks	59	11:32am	2 Hours	30	0	Bembicium nanum	Dry	32.3	West	Flat	40.5	Edge	Centre	26.4	Edge	West	32.8	14.1	-8.2	5.9	-0.5
February 28th	Marino Rocks	60	11:33am	2 Hours	30	0	Bembicium nanum	Dry	34	Centre	Flat	39.8	Edge	Centre	29.9	Flat	West	34	9.9	-5.8	4.1	0
February 28th	Marino Rocks	61	12:37pm	4 Hours	32	0	Bembicium nanum	Dry	37.4	East	Depression	41.1	Edge	East	31.3	Flat	Centre	34.3	9.8	-3.7	6.1	3.1
February 28th	Marino Rocks	62	12:39pm	4 Hours	32	0	Bembicium nanum	Dry	35.5	West	Edge	38.2	Edge	East	31.3	Flat	Centre	33.6	6.9	-2.7	4.2	1.9
February 28th	Marino Rocks	63	12:41pm	4 Hours	32	0	Bembicium nanum	Dry	40.5	West	Edge	46.2	Flat	East	36.3	Flat	West	42.2	9.9	-5.7	4.2	-1.7
February 28th	Marino Rocks	64	12:42pm	4 Hours	32	0	Bembicium nanum	Dry	41.3	Centre	Flat	46.7	Edge	Centre	38.5	Depression	Centre	41.6	8.2	-5.4	2.8	-0.3
February 28th	Marino Rocks	65	12:48pm	4 Hours	32	0	Bembicium nanum	Dry	42.6	Centre	Flat	47.2	Edge	East	38.7	Flat	Centre	41.1	8.5	-4.6	3.9	1.5
February 28th	Marino Rocks	66	12:50pm	4 Hours	32	0	Bembicium nanum	Dry	44.2	Centre	Edge	47.3	Edge	Centre	39.8	Edge	Centre	42.7	7.5	-3.1	4.4	1.5
February 28th	Marino Rocks	67	12:51pm	4 Hours	32	0	Bembicium nanum	Dry	39.4	West	Edge	42.9	Edge	West	30.9	Flat	East	34.8	12	-3.5	8.5	4.6
February 28th	Marino Rocks	68	12:54pm	4 Hours	32	0	Bembicium nanum	Dry	39.5	Centre	Flat	44.5	Edge	West	35.3	Flat	West	39	9.2	-5	4.2	0.5
February 28th	Marino Rocks	69	12:56pm	4 Hours	32	0	Bembicium nanum	Dry	39.5	East	Edge	46.8	Edge	Centre	30.6	Flat	Centre	36.5	16.2	-7.3	8.9	3
February 28th	Marino Rocks	70	12:57pm	4 Hours	32	0	Bembicium nanum	Dry	40.8	Centre	Flat	45.9	Edge	Centre	38.6	Flat	Centre	40.6	7.3	-5.1	2.2	0.2
February 28th	Marino Rocks	71	12:59pm	4 Hours	32	0	Bembicium nanum	Dry	41.4	Centre	Flat	46.3	Edge	East	36.7	Depression	Centre	39.7	9.6	-4.9	4.7	1.7
February 28th	Marino Rocks	72	1:00pm	4 Hours	32	0	Bembicium nanum	Dry	39.9	West	Edge	47	Edge	West	37.9	Flat	Centre	40.9	9.1	-7.1	2	-1
February 28th	Marino Rocks	73	1:01pm	4 Hours	32	0	Bembicium nanum	Dry	43.3	East	Flat	47.3	Edge	East	38.5	Edge	West	42	8.8	-4	4.8	1.3
February 28th	Marino Rocks	74	1:02pm	4 Hours	32	0	Bembicium nanum	Dry	42.1	West	Edge	49.4	Edge	East	39.5	Edge	West	43.2	9.9	-7.3	2.6	-1.1
February 28th	Marino Rocks	75	1:04pm	4 Hours	32	0	Bembicium nanum	Dry	41.1	East	Edge	44.3	Edge	West	38.6	Edge	East	40.2	5.7	-3.2	2.5	0.9
February 28th	Marino Rocks	76	1:12pm	4 Hours	33	0	Bembicium nanum	Dry	35	West	Flat	46.1	Edge	East	34.8	Edge	West	38.5	11.3	-11.1	0.2	-3.5
February 28th	Marino Rocks	77	1:13pm	4 Hours	33	0	Bembicium nanum	Dry	39.3	East	Edge	46.4	Edge	Centre	36.5	Flat	East	40.5	9.9	-7.1	2.8	-1.2
February 28th	Marino Rocks	78	1:14pm	4 Hours	33	0	Bembicium nanum	Dry	35.5	Centre	Flat	44.8	Edge	East	33.4	Flat	Centre	36.3	11.4	-9.3	2.1	-0.8
February 28th	Marino Rocks	79	1:17pm	4 Hours	33	0	Bembicium nanum	Dry	35.6	East	Flat	45.2	Edge	Centre	34.7	Flat	East	37.9	10.5	-9.6	0.9	-2.3
February 28th	Marino Rocks	80	1:19pm	4 Hours	33	0	Bembicium nanum	Wet	37.3	Centre	Flat	42.3	Edge	West	30	Edge	East	36.3	12.3	-5	7.3	1
February 28th	Marino Rocks	81	1:20pm	4 Hours	33	0	Bembicium nanum	Dry	38.9	West	Flat	46.9	Edge	East	38.1	Edge	West	41.5	8.8	-8	0.8	-2.6
February 28th	Marino Rocks	82	1:22pm	4 Hours	33	0	Bembicium nanum	Dry	38.8	Centre	Flat	46.4	Edge	East	35.5	Flat	Centre	38.8	10.9	-7.6	3.3	0
February 28th	Marino Rocks	83	1:24pm	4 Hours	33	0	Bembicium nanum	Dry	39.1	Centre	Flat	46.5	Flat	Centre	37.8	Flat	Centre	41.3	8.7	-7.4	1.3	-2.2
February 28th	Marino Rocks	84	1:25pm	4 Hours	33	0	Bembicium nanum	Dry	38.8	West	Flat	46.8	Edge	Centre	36	Edge	East	40.8	10.8	-8	2.8	-2
February 28th	Marino Rocks	85	1:26pm	4 Hours	33	0	Bembicium nanum	Dry	40	Centre	Edge	48	Edge	West	34.3	Flat	Centre	40.4	13.7	-8	5.7	-0.4
February 28th	Marino Rocks	86	1:27pm	4 Hours	33	0	Bembicium nanum	Dry	39.5	West	Depression	43.6	Edge	East	33.8	Flat	Centre	39.4	9.8	-4.1	5.7	0.1
February 28th	Marino Rocks	87	1:28pm	4 Hours	33	0	Bembicium nanum	Dry	43.8	West	Flat	48.2	Edge	Centre	36.2	Edge	Centre	42.6	12	-4.4	7.6	1.2
February 28th	Marino Rocks	88	1:30pm	4 Hours	33	0	Bembicium nanum	Dry	39.8	West	Edge	51.7	Edge	Centre	38.6	Edge	West	43.6	13.1	-11.9	1.2	-3.8
February 28th	Marino Rocks	89	1:31pm	4 Hours	33	0	Bembicium nanum	Dry	42.9	Centre	Flat	48.6	Edge	West	36	Edge	East	42.1	12.6	-5.7	6.9	0.8
February 28th	Marino Rocks	90	1:33pm	4 Hours	33	0	Bembicium nanum	Dry	42.5	Centre	Flat	48.4	Edge	Centre	29.4	Edge	West	36.3	19	-5.9	13.1	6.2

## Sheet: PRIMER emersion times
Target temp	Max temp	Min temp	Average temp	Range	Max - target	Target - min	Target - average		Emersion time	Species	Date
27.3	33.4	24.9	27.9	8.5	6.1	2.4	-0.6		1 hour	Bembicium nanum	February 3rd
34.8	38.4	30.1	35.3	8.3	3.6	4.7	-0.5		1 hour	Bembicium nanum	February 3rd
31.8	37.5	27.4	31.1	10.1	5.7	4.4	0.7		1 hour	Bembicium nanum	February 3rd
25.2	35.2	24.8	29	10.4	10	0.4	-3.8		1 hour	Bembicium nanum	February 3rd
27.9	38.2	26.4	29.6	11.8	10.3	1.5	-1.7		1 hour	Bembicium nanum	February 3rd
33.9	38.1	31.2	33.7	6.9	4.2	2.7	0.2		1 hour	Bembicium nanum	February 3rd
30	39.5	26.2	30.7	13.3	9.5	3.8	-0.7		1 hour	Bembicium nanum	February 3rd
31.9	37.3	24.5	30.3	12.8	5.4	7.4	1.6		1 hour	Bembicium nanum	February 3rd
38.7	42.3	28.3	34.2	14	3.6	10.4	4.5		1 hour	Bembicium nanum	February 3rd
34.3	40.7	31.1	34.2	9.6	6.4	3.2	0.1		1 hour	Bembicium nanum	February 3rd
34.4	39.6	27.3	31.6	12.3	5.2	7.1	2.8		1 hour	Bembicium nanum	February 3rd
35	37.8	26.2	31.2	11.6	2.8	8.8	3.8		1 hour	Bembicium nanum	February 3rd
34.5	40.2	30.7	35.2	9.5	5.7	3.8	-0.7		1 hour	Bembicium nanum	February 3rd
29.1	34.7	26.7	28.8	8	5.6	2.4	0.3		1 hour	Bembicium nanum	February 3rd
33.7	38.9	25.2	29.9	13.7	5.2	8.5	3.8		1 hour	Bembicium nanum	February 3rd
32.8	40.1	32.1	34.3	8	7.3	0.7	-1.5		1 hour	Bembicium nanum	February 3rd
29.1	35.1	25.5	28.7	9.6	6	3.6	0.4		1 hour	Bembicium nanum	February 3rd
30.1	41.4	27.8	32.9	13.6	11.3	2.3	-2.8		1 hour	Bembicium nanum	February 3rd
32.7	37.8	28.7	32.3	9.1	5.1	4	0.4		1 hour	Bembicium nanum	February 3rd
30.2	35.6	27.3	30.2	8.3	5.4	2.9	0		1 hour	Bembicium nanum	February 3rd
31.7	41.7	29.2	33.7	12.5	10	2.5	-2		1 hour	Bembicium nanum	February 3rd
32.1	42.3	31.7	35.2	10.6	10.2	0.4	-3.1		1 hour	Bembicium nanum	February 3rd
32.8	39.3	30.1	32.8	9.2	6.5	2.7	0		1 hour	Bembicium nanum	February 3rd
31.8	40.8	26.4	33.8	14.4	9	5.4	-2		1 hour	Bembicium nanum	February 3rd
31.4	41.4	27.8	33.9	13.6	10	3.6	-2.5		1 hour	Bembicium nanum	February 3rd
35.4	42.4	31.5	36.2	10.9	7	3.9	-0.8		1 hour	Bembicium nanum	February 3rd
33.4	39.6	28	32.5	11.6	6.2	5.4	0.9		1 hour	Bembicium nanum	February 3rd
39.5	42	34.8	38.7	7.2	2.5	4.7	0.8		1 hour	Bembicium nanum	February 3rd
36.7	41.3	34	36.3	7.3	4.6	2.7	0.4		1 hour	Bembicium nanum	February 3rd
29.5	40.9	28.5	34.8	12.4	11.4	1	-5.3		1 hour	Bembicium nanum	February 3rd
32.4	39.4	30.2	33.3	9.2	7	2.2	-0.9		2 hours	Bembicium nanum	February 3rd
35.3	42.8	27.9	33.7	14.9	7.5	7.4	1.6		2 hours	Bembicium nanum	February 3rd
41.5	43	32.9	38.5	10.1	1.5	8.6	3		2 hours	Bembicium nanum	February 3rd
31.1	35.7	25.6	30.3	10.1	4.6	5.5	0.8		2 hours	Bembicium nanum	February 3rd
30.7	38.2	29.4	32.6	8.8	7.5	1.3	-1.9		2 hours	Bembicium nanum	February 3rd
32.2	39.8	25.4	32.8	14.4	7.6	6.8	-0.6		2 hours	Bembicium nanum	February 3rd
30.8	36.1	28.7	31.9	7.4	5.3	2.1	-1.1		2 hours	Bembicium nanum	February 3rd
36.6	39.6	29.2	34.6	10.4	3	7.4	2		2 hours	Bembicium nanum	February 3rd
39.2	42	28.6	34	13.4	2.8	10.6	5.2		2 hours	Bembicium nanum	February 3rd
35.2	41.4	29.1	34.6	12.3	6.2	6.1	0.6		2 hours	Bembicium nanum	February 3rd
38.3	42.3	33.2	36.9	9.1	4	5.1	1.4		2 hours	Bembicium nanum	February 3rd
35.8	38.5	30.9	34.4	7.6	2.7	4.9	1.4		2 hours	Bembicium nanum	February 3rd
32.7	35.1	28.8	31.1	6.3	2.4	3.9	1.6		2 hours	Bembicium nanum	February 3rd
38.8	42.4	32.2	37.5	10.2	3.6	6.6	1.3		2 hours	Bembicium nanum	February 3rd
40.4	41.3	34.5	38.5	6.8	0.9	5.9	1.9		2 hours	Bembicium nanum	February 3rd
28.8	35.7	25.3	29.7	10.4	6.9	3.5	-0.9		2 hours	Bembicium nanum	February 3rd
35.6	40.2	32.3	35	7.9	4.6	3.3	0.6		2 hours	Bembicium nanum	February 3rd
35.6	41.7	32.8	36.4	8.9	6.1	2.8	-0.8		2 hours	Bembicium nanum	February 3rd
36	43.5	33.8	37.4	9.7	7.5	2.2	-1.4		2 hours	Bembicium nanum	February 3rd
31	40.4	30.3	34	10.1	9.4	0.7	-3		2 hours	Bembicium nanum	February 3rd
33.6	42.1	30.3	34.2	11.8	8.5	3.3	-0.6		2 hours	Bembicium nanum	February 3rd
35.9	41.3	34.1	36.8	7.2	5.4	1.8	-0.9		2 hours	Bembicium nanum	February 3rd
36.5	42.3	29.4	35.5	12.9	5.8	7.1	1		2 hours	Bembicium nanum	February 3rd
33.1	39.9	30.2	33.3	9.7	6.8	2.9	-0.2		2 hours	Bembicium nanum	February 3rd
34.8	39.8	29.4	32.5	10.4	5	5.4	2.3		2 hours	Bembicium nanum	February 3rd
33.3	40.7	29	35.2	11.7	7.4	4.3	-1.9		2 hours	Bembicium nanum	February 3rd
34.2	41.9	31.2	34.8	10.7	7.7	3	-0.6		2 hours	Bembicium nanum	February 3rd
35.8	39.9	30.4	33.5	9.5	4.1	5.4	2.3		2 hours	Bembicium nanum	February 3rd
31.9	38.4	31	33.6	7.4	6.5	0.9	-1.7		2 hours	Bembicium nanum	February 3rd
33.6	38	27.5	32.4	10.5	4.4	6.1	1.2		2 hours	Bembicium nanum	February 3rd
34.2	39.8	30.8	34.4	9	5.6	3.4	-0.2		4 hours	Bembicium nanum	February 3rd
36.8	40.2	30.8	34.5	9.4	3.4	6	2.3		4 hours	Bembicium nanum	February 3rd
36.5	40.9	31.6	35.7	9.3	4.4	4.9	0.8		4 hours	Bembicium nanum	February 3rd
37	40	28.2	33.2	11.8	3	8.8	3.8		4 hours	Bembicium nanum	February 3rd
34.6	38.9	29.7	33.7	9.2	4.3	4.9	0.9		4 hours	Bembicium nanum	February 3rd
32.5	37.8	29.2	32.9	8.6	5.3	3.3	-0.4		4 hours	Bembicium nanum	February 3rd
33.4	38.8	32.3	34.8	6.5	5.4	1.1	-1.4		4 hours	Bembicium nanum	February 3rd
32.1	36.3	28	30.2	8.3	4.2	4.1	1.9		4 hours	Bembicium nanum	February 3rd
34.8	40.3	33	36.1	7.3	5.5	1.8	-1.3		4 hours	Bembicium nanum	February 3rd
32.3	38.1	30	33.5	8.1	5.8	2.3	-1.2		4 hours	Bembicium nanum	February 3rd
35.1	39.2	31.9	35.2	7.3	4.1	3.2	-0.1		4 hours	Bembicium nanum	February 3rd
37	40.6	34.4	36.7	6.2	3.6	2.6	0.3		4 hours	Bembicium nanum	February 3rd
35	41.4	30.2	33.9	11.2	6.4	4.8	1.1		4 hours	Bembicium nanum	February 3rd
33.5	42.6	33.1	37.3	9.5	9.1	0.4	-3.8		4 hours	Bembicium nanum	February 3rd
37.3	41.5	35.3	37.9	6.2	4.2	2	-0.6		4 hours	Bembicium nanum	February 3rd
38.3	45.2	34.5	40.4	10.7	6.9	3.8	-2.1		4 hours	Bembicium nanum	February 3rd
37	43.6	35.2	37.6	8.4	6.6	1.8	-0.6		4 hours	Bembicium nanum	February 3rd
37.5	40.8	34.8	37.3	6	3.3	2.7	0.2		4 hours	Bembicium nanum	February 3rd
38	41.8	34.8	37.3	7	3.8	3.2	0.7		4 hours	Bembicium nanum	February 3rd
41.4	42.7	34.8	38.4	7.9	1.3	6.6	3		4 hours	Bembicium nanum	February 3rd
36.2	42.3	35.3	37.6	7	6.1	0.9	-1.4		4 hours	Bembicium nanum	February 3rd
35.8	39.8	29.8	33.5	10	4	6	2.3		4 hours	Bembicium nanum	February 3rd
33	41.3	30.6	34.3	10.7	8.3	2.4	-1.3		4 hours	Bembicium nanum	February 3rd
38.3	42.6	32.4	37.4	10.2	4.3	5.9	0.9		4 hours	Bembicium nanum	February 3rd
39.3	42.1	33.9	36.5	8.2	2.8	5.4	2.8		4 hours	Bembicium nanum	February 3rd
32.8	37.9	27.8	33.6	10.1	5.1	5	-0.8		4 hours	Bembicium nanum	February 3rd
31.7	39.8	29.8	33.3	10	8.1	1.9	-1.6		4 hours	Bembicium nanum	February 3rd
32.3	38.9	30.8	33.1	8.1	6.6	1.5	-0.8		4 hours	Bembicium nanum	February 3rd
37.7	40.8	31.9	35.3	8.9	3.1	5.8	2.4		4 hours	Bembicium nanum	February 3rd
32.8	37.5	31.1	32.8	6.4	4.7	1.7	0		4 hours	Bembicium nanum	February 3rd
25	26.6	24.4	25.5	2.2	1.6	0.6	-0.5		1 hour	Nerita atramentosa	February 10th
26.3	27.4	25.3	26.2	2.1	1.1	1	0.1		1 hour	Nerita atramentosa	February 10th
25	28.8	24.6	25.8	4.2	3.8	0.4	-0.8		1 hour	Nerita atramentosa	February 10th
26.2	28.7	25.1	26.3	3.6	2.5	1.1	-0.1		1 hour	Nerita atramentosa	February 10th
26.7	28.8	25.4	26.8	3.4	2.1	1.3	-0.1		1 hour	Nerita atramentosa	February 10th
26.5	29.4	25.3	26.9	4.1	2.9	1.2	-0.4		1 hour	Nerita atramentosa	February 10th
26.1	29.9	24.8	26.6	5.1	3.8	1.3	-0.5		1 hour	Nerita atramentosa	February 10th
27.7	31.7	26.1	27.9	5.6	4	1.6	-0.2		1 hour	Nerita atramentosa	February 10th
27.3	29.6	26.3	27.6	3.3	2.3	1	-0.3		1 hour	Nerita atramentosa	February 10th
25.9	34.2	25.5	28.4	8.7	8.3	0.4	-2.5		1 hour	Nerita atramentosa	February 10th
28.1	33.9	26.8	28.4	7.1	5.8	1.3	-0.3		1 hour	Nerita atramentosa	February 10th
27.1	30.1	24.9	26.9	5.2	3	2.2	0.2		1 hour	Nerita atramentosa	February 10th
28.1	30	26.4	27.8	3.6	1.9	1.7	0.3		1 hour	Nerita atramentosa	February 10th
27.6	32	26	27.9	6	4.4	1.6	-0.3		1 hour	Nerita atramentosa	February 10th
27.2	31.8	24.4	28.2	7.4	4.6	2.8	-1		1 hour	Nerita atramentosa	February 10th
28.7	34.3	26.3	28.9	8	5.6	2.4	-0.2		1 hour	Nerita atramentosa	February 10th
28.8	35.8	26.8	29.2	9	7	2	-0.4		1 hour	Nerita atramentosa	February 10th
27.5	33.1	26.2	28.6	6.9	5.6	1.3	-1.1		1 hour	Nerita atramentosa	February 10th
30.3	31.8	25.8	28.4	6	1.5	4.5	1.9		1 hour	Nerita atramentosa	February 10th
27.1	31.5	26.4	28	5.1	4.4	0.7	-0.9		1 hour	Nerita atramentosa	February 10th
29.1	34.7	28.5	31.2	6.2	5.6	0.6	-2.1		1 hour	Nerita atramentosa	February 10th
28.2	33.3	26.7	29.2	6.6	5.1	1.5	-1		1 hour	Nerita atramentosa	February 10th
29.2	32.9	26.5	29.1	6.4	3.7	2.7	0.1		1 hour	Nerita atramentosa	February 10th
28.3	31.3	25.8	27.8	5.5	3	2.5	0.5		1 hour	Nerita atramentosa	February 10th
29.3	37.3	28.4	31.8	8.9	8	0.9	-2.5		1 hour	Nerita atramentosa	February 10th
27.3	35.9	26.2	28.9	9.7	8.6	1.1	-1.6		2 hours	Nerita atramentosa	February 10th
29.1	34.3	27.6	29.9	6.7	5.2	1.5	-0.8		2 hours	Nerita atramentosa	February 10th
26.5	31.8	25.2	27	6.6	5.3	1.3	-0.5		2 hours	Nerita atramentosa	February 10th
29.8	32.2	27.6	29.2	4.6	2.4	2.2	0.6		2 hours	Nerita atramentosa	February 10th
30.4	35.2	27.7	30.3	7.5	4.8	2.7	0.1		2 hours	Nerita atramentosa	February 10th
29.8	31.9	27.5	29.7	4.4	2.1	2.3	0.1		2 hours	Nerita atramentosa	February 10th
30.6	38.7	28	31.2	10.7	8.1	2.6	-0.6		2 hours	Nerita atramentosa	February 10th
31.4	35	27.8	30.6	7.2	3.6	3.6	0.8		2 hours	Nerita atramentosa	February 10th
28.5	34.8	26.8	29.7	8	6.3	1.7	-1.2		2 hours	Nerita atramentosa	February 10th
28.7	35.5	27.6	30.5	7.9	6.8	1.1	-1.8		2 hours	Nerita atramentosa	February 10th
31.3	34.2	28.6	31.3	5.6	2.9	2.7	0		2 hours	Nerita atramentosa	February 10th
29.7	34	28.2	30.3	5.8	4.3	1.5	-0.6		2 hours	Nerita atramentosa	February 10th
30.9	37.8	27.4	30.8	10.4	6.9	3.5	0.1		2 hours	Nerita atramentosa	February 10th
30.8	33	29	30.6	4	2.2	1.8	0.2		2 hours	Nerita atramentosa	February 10th
29.9	31.1	26.9	28.8	4.2	1.2	3	1.1		2 hours	Nerita atramentosa	February 10th
27.5	31.8	27.3	29.2	4.5	4.3	0.2	-1.7		2 hours	Nerita atramentosa	February 10th
28.4	34.2	26.8	29.9	7.4	5.8	1.6	-1.5		2 hours	Nerita atramentosa	February 10th
30.7	38.8	29	33.3	9.8	8.1	1.7	-2.6		2 hours	Nerita atramentosa	February 10th
32.7	39	31.5	34.5	7.5	6.3	1.2	-1.8		2 hours	Nerita atramentosa	February 10th
30.9	35.6	29.5	31.7	6.1	4.7	1.4	-0.8		2 hours	Nerita atramentosa	February 10th
33.5	42.6	31.8	35.1	10.8	9.1	1.7	-1.6		2 hours	Nerita atramentosa	February 10th
30.2	35.6	29.7	31.5	5.9	5.4	0.5	-1.3		2 hours	Nerita atramentosa	February 10th
31.9	40	30.5	33.6	9.5	8.1	1.4	-1.7		2 hours	Nerita atramentosa	February 10th
32.5	38.9	29.6	33.6	9.3	6.4	2.9	-1.1		2 hours	Nerita atramentosa	February 10th
31.9	38.3	28.8	32.2	9.5	6.4	3.1	-0.3		2 hours	Nerita atramentosa	February 10th
30.9	33.5	28.4	30.5	5.1	2.6	2.5	0.4		2 hours	Nerita atramentosa	February 10th
34.4	46.7	33.1	38.3	13.6	12.3	1.3	-3.9		4 hours	Nerita atramentosa	February 10th
32.1	37.8	31.3	33.4	6.5	5.7	0.8	-1.3		4 hours	Nerita atramentosa	February 10th
32.7	41.7	32	35.7	9.7	9	0.7	-3		4 hours	Nerita atramentosa	February 10th
34.3	42.8	34.1	37.6	8.7	8.5	0.2	-3.3		4 hours	Nerita atramentosa	February 10th
34.8	38.7	30.3	33.1	8.4	3.9	4.5	1.7		4 hours	Nerita atramentosa	February 10th
31.7	40.6	30.4	35.2	10.2	8.9	1.3	-3.5		4 hours	Nerita atramentosa	February 10th
31.5	40.8	29.2	34.3	11.6	9.3	2.3	-2.8		4 hours	Nerita atramentosa	February 10th
32.5	38.7	30.6	34	8.1	6.2	1.9	-1.5		4 hours	Nerita atramentosa	February 10th
30.7	40.3	30.4	35.1	9.9	9.6	0.3	-4.4		4 hours	Nerita atramentosa	February 10th
33	37.1	31.3	33.8	5.8	4.1	1.7	-0.8		4 hours	Nerita atramentosa	February 10th
33.1	39.1	30.7	34.3	8.4	6	2.4	-1.2		4 hours	Nerita atramentosa	February 10th
33.5	38.7	33.5	36.3	5.2	5.2	0	-2.8		4 hours	Nerita atramentosa	February 10th
33.3	43.3	32.8	37.7	10.5	10	0.5	-4.4		4 hours	Nerita atramentosa	February 10th
32	44.6	31.8	37.6	12.8	12.6	0.2	-5.6		4 hours	Nerita atramentosa	February 10th
31.9	43.3	30	35.4	13.3	11.4	1.9	-3.5		4 hours	Nerita atramentosa	February 10th
34.4	41.3	33.6	37.2	7.7	6.9	0.8	-2.8		4 hours	Nerita atramentosa	February 10th
33.9	38.9	32.6	35	6.3	5	1.3	-1.1		4 hours	Nerita atramentosa	February 10th
30.8	36.4	30.3	32.3	6.1	5.6	0.5	-1.5		4 hours	Nerita atramentosa	February 10th
35.4	39.5	32.8	34.7	6.7	4.1	2.6	0.7		4 hours	Nerita atramentosa	February 10th
35.3	41.8	30.7	35.8	11.1	6.5	4.6	-0.5		4 hours	Nerita atramentosa	February 10th
32.5	37.7	30.3	32.9	7.4	5.2	2.2	-0.4		4 hours	Nerita atramentosa	February 10th
34.5	43.6	32.8	38.5	10.8	9.1	1.7	-4		4 hours	Nerita atramentosa	February 10th
35.8	42.6	32.9	37.7	9.7	6.8	2.9	-1.9		4 hours	Nerita atramentosa	February 10th
35.2	41	33.2	36.7	7.8	5.8	2	-1.5		4 hours	Nerita atramentosa	February 10th
34.4	36.8	30.6	33.2	6.2	2.4	3.8	1.2		4 hours	Nerita atramentosa	February 10th
38.2	44.1	36.6	39.5	7.5	5.9	1.6	-1.3		4 hours	Nerita atramentosa	February 10th
33.2	36.7	32.5	34.1	4.2	3.5	0.7	-0.9		4 hours	Nerita atramentosa	February 10th
36.3	43.4	34.6	38.6	8.8	7.1	1.7	-2.3		4 hours	Nerita atramentosa	February 10th
35.8	43.4	31.7	37.5	11.7	7.6	4.1	-1.7		4 hours	Nerita atramentosa	February 10th
35.4	40.1	33.4	36.8	6.7	4.7	2	-1.4		4 hours	Nerita atramentosa	February 10th
22.1	24.5	21.1	22.7	3.4	2.4	1	-0.6		1 hour	Nerita atramentosa	February 14th
22.6	27.1	21.1	22.8	6	4.5	1.5	-0.2		1 hour	Nerita atramentosa	February 14th
23.2	29.3	20.8	23.4	8.5	6.1	2.4	-0.2		1 hour	Nerita atramentosa	February 14th
25.2	27.4	23.4	25.3	4	2.2	1.8	-0.1		1 hour	Nerita atramentosa	February 14th
23.6	26.7	22.1	24	4.6	3.1	1.5	-0.4		1 hour	Nerita atramentosa	February 14th
25.1	26.7	22.7	24.5	4	1.6	2.4	0.6		1 hour	Nerita atramentosa	February 14th
23.2	24.9	22.4	23.2	2.5	1.7	0.8	0		1 hour	Nerita atramentosa	February 14th
23.1	28.7	21.7	24.2	7	5.6	1.4	-1.1		1 hour	Nerita atramentosa	February 14th
25.8	30.2	22.8	26	7.4	4.4	3	-0.2		1 hour	Nerita atramentosa	February 14th
23.9	27.1	22.4	24.2	4.7	3.2	1.5	-0.3		1 hour	Nerita atramentosa	February 14th
24.7	30	22.9	26	7.1	5.3	1.8	-1.3		1 hour	Nerita atramentosa	February 14th
24.9	28	22.5	25	5.5	3.1	2.4	-0.1		1 hour	Nerita atramentosa	February 14th
25.3	28.9	24.3	26	4.6	3.6	1	-0.7		1 hour	Nerita atramentosa	February 14th
24.4	29.8	23.9	26.3	5.9	5.4	0.5	-1.9		1 hour	Nerita atramentosa	February 14th
26	30.9	24.4	26.7	6.5	4.9	1.6	-0.7		1 hour	Nerita atramentosa	February 14th
23	30.2	21.1	24.2	9.1	7.2	1.9	-1.2		1 hour	Nerita atramentosa	February 14th
24	28.4	22.4	24.7	6	4.4	1.6	-0.7		1 hour	Nerita atramentosa	February 14th
26.4	31	23.4	26.6	7.6	4.6	3	-0.2		1 hour	Nerita atramentosa	February 14th
29.6	37.2	27.8	31.2	9.4	7.6	1.8	-1.6		1 hour	Nerita atramentosa	February 14th
25.1	30.4	24.3	26.5	6.1	5.3	0.8	-1.4		1 hour	Nerita atramentosa	February 14th
27	34.9	25.4	28.9	9.5	7.9	1.6	-1.9		1 hour	Nerita atramentosa	February 14th
25	27.3	22.2	24.4	5.1	2.3	2.8	0.6		1 hour	Nerita atramentosa	February 14th
26.6	32.8	25.9	29.3	6.9	6.2	0.7	-2.7		1 hour	Nerita atramentosa	February 14th
28	37.2	24.6	30.3	12.6	9.2	3.4	-2.3		1 hour	Nerita atramentosa	February 14th
25.9	28.5	23.3	25.6	5.2	2.6	2.6	0.3		1 hour	Nerita atramentosa	February 14th
27.3	31.1	25.1	27.6	6	3.8	2.2	-0.3		1 hour	Nerita atramentosa	February 14th
26.2	29.8	24.8	26.8	5	3.6	1.4	-0.6		1 hour	Nerita atramentosa	February 14th
26.1	31.3	23.9	27	7.4	5.2	2.2	-0.9		1 hour	Nerita atramentosa	February 14th
29.9	31.8	27.8	29.9	4	1.9	2.1	0		1 hour	Nerita atramentosa	February 14th
31.1	33.2	27.3	30.2	5.9	2.1	3.8	0.9		1 hour	Nerita atramentosa	February 14th
27	35.1	24.7	29.3	10.4	8.1	2.3	-2.3		2 hours	Nerita atramentosa	February 14th
27.7	33.3	24.6	28.3	8.7	5.6	3.1	-0.6		2 hours	Nerita atramentosa	February 14th
26	28.7	25	26.3	3.7	2.7	1	-0.3		2 hours	Nerita atramentosa	February 14th
27.8	31.1	26.5	28.5	4.6	3.3	1.3	-0.7		2 hours	Nerita atramentosa	February 14th
31.5	39.2	29.5	32.4	9.7	7.7	2	-0.9		2 hours	Nerita atramentosa	February 14th
27.5	29.3	23.2	26.1	6.1	1.8	4.3	1.4		2 hours	Nerita atramentosa	February 14th
27.8	30.8	26.3	27.9	4.5	3	1.5	-0.1		2 hours	Nerita atramentosa	February 14th
27.3	31.2	26.8	28.9	4.4	3.9	0.5	-1.6		2 hours	Nerita atramentosa	February 14th
26.9	30.6	25.9	27.9	4.7	3.7	1	-1		2 hours	Nerita atramentosa	February 14th
25.9	31.2	23.5	27.2	7.7	5.3	2.4	-1.3		2 hours	Nerita atramentosa	February 14th
30.3	33	26.3	29.5	6.7	2.7	4	0.8		2 hours	Nerita atramentosa	February 14th
27.1	33.3	25.8	29	7.5	6.2	1.3	-1.9		2 hours	Nerita atramentosa	February 14th
27.9	31.7	24.3	26.9	7.4	3.8	3.6	1		2 hours	Nerita atramentosa	February 14th
28.3	33.2	27.9	29.8	5.3	4.9	0.4	-1.5		2 hours	Nerita atramentosa	February 14th
30.8	38.1	28.1	31.8	10	7.3	2.7	-1		2 hours	Nerita atramentosa	February 14th
30.8	34.2	28.4	30.6	5.8	3.4	2.4	0.2		2 hours	Nerita atramentosa	February 14th
28.3	33.5	26.7	29.9	6.8	5.2	1.6	-1.6		2 hours	Nerita atramentosa	February 14th
27.7	33.1	25.8	29.3	7.3	5.4	1.9	-1.6		2 hours	Nerita atramentosa	February 14th
31.2	38.3	30.1	33	8.2	7.1	1.1	-1.8		2 hours	Nerita atramentosa	February 14th
32.2	35.4	30.3	32.6	5.1	3.2	1.9	-0.4		2 hours	Nerita atramentosa	February 14th
32.7	35.7	28.5	31.8	7.2	3	4.2	0.9		2 hours	Nerita atramentosa	February 14th
29	38.1	27.8	32	10.3	9.1	1.2	-3		2 hours	Nerita atramentosa	February 14th
27.7	35.6	27.3	30.6	8.3	7.9	0.4	-2.9		2 hours	Nerita atramentosa	February 14th
28.8	32.6	27.7	29.5	4.9	3.8	1.1	-0.7		2 hours	Nerita atramentosa	February 14th
28.3	36.5	26.2	30	10.3	8.2	2.1	-1.7		2 hours	Nerita atramentosa	February 14th
31.5	37.5	28.9	32.3	8.6	6	2.6	-0.8		2 hours	Nerita atramentosa	February 14th
30.3	34.2	27.4	30.5	6.8	3.9	2.9	-0.2		2 hours	Nerita atramentosa	February 14th
30.4	35.1	28.7	31.7	6.4	4.7	1.7	-1.3		2 hours	Nerita atramentosa	February 14th
29	35.2	27.8	30.9	7.4	6.2	1.2	-1.9		2 hours	Nerita atramentosa	February 14th
26.5	29	23	25.2	6	2.5	3.5	1.3		2 hours	Nerita atramentosa	February 14th
29.4	34.4	28.4	30.5	6	5	1	-1.1		4 hours	Nerita atramentosa	February 14th
31.6	37	29.5	32.1	7.5	5.4	2.1	-0.5		4 hours	Nerita atramentosa	February 14th
30.8	38.2	24.8	30.2	13.4	7.4	6	0.6		4 hours	Nerita atramentosa	February 14th
31.2	37.8	28.6	32.6	9.2	6.6	2.6	-1.4		4 hours	Nerita atramentosa	February 14th
31.5	35.1	29.4	32.3	5.7	3.6	2.1	-0.8		4 hours	Nerita atramentosa	February 14th
29.1	34.8	26.9	29.4	7.9	5.7	2.2	-0.3		4 hours	Nerita atramentosa	February 14th
35	39.5	32.6	36.1	6.9	4.5	2.4	-1.1		4 hours	Nerita atramentosa	February 14th
30.2	32.5	26.7	29.3	5.8	2.3	3.5	0.9		4 hours	Nerita atramentosa	February 14th
32.2	38.2	30.3	33.4	7.9	6	1.9	-1.2		4 hours	Nerita atramentosa	February 14th
31.7	36.6	28.6	32.1	8	4.9	3.1	-0.4		4 hours	Nerita atramentosa	February 14th
30.3	35.4	29	31.8	6.4	5.1	1.3	-1.5		4 hours	Nerita atramentosa	February 14th
30.7	35.4	29.8	32.1	5.6	4.7	0.9	-1.4		4 hours	Nerita atramentosa	February 14th
31.2	36	28.2	31.9	7.8	4.8	3	-0.7		4 hours	Nerita atramentosa	February 14th
30.2	37	28.4	31.9	8.6	6.8	1.8	-1.7		4 hours	Nerita atramentosa	February 14th
31.9	36.6	28.4	32.3	8.2	4.7	3.5	-0.4		4 hours	Nerita atramentosa	February 14th
30.6	39.9	29	33.7	10.9	9.3	1.6	-3.1		4 hours	Nerita atramentosa	February 14th
33.9	38.1	30.9	33.8	7.2	4.2	3	0.1		4 hours	Nerita atramentosa	February 14th
32.7	39.4	27.2	33.8	12.2	6.7	5.5	-1.1		4 hours	Nerita atramentosa	February 14th
33.4	39.8	28.3	33.5	11.5	6.4	5.1	-0.1		4 hours	Nerita atramentosa	February 14th
31.3	37.7	28.7	32.3	9	6.4	2.6	-1		4 hours	Nerita atramentosa	February 14th
36.2	38	32.5	35	5.5	1.8	3.7	1.2		4 hours	Nerita atramentosa	February 14th
29.2	39.1	27.4	32.6	11.7	9.9	1.8	-3.4		4 hours	Nerita atramentosa	February 14th
31.4	36.5	27.6	31.8	8.9	5.1	3.8	-0.4		4 hours	Nerita atramentosa	February 14th
32.8	38.2	31.1	33.5	7.1	5.4	1.7	-0.7		4 hours	Nerita atramentosa	February 14th
31.7	35.7	30.8	32.4	4.9	4	0.9	-0.7		4 hours	Nerita atramentosa	February 14th
32.8	41.2	32.2	34.8	9	8.4	0.6	-2		4 hours	Nerita atramentosa	February 14th
29.9	36.2	27.8	31.2	8.4	6.3	2.1	-1.3		4 hours	Nerita atramentosa	February 14th
32.6	37.2	28	33.3	9.2	4.6	4.6	-0.7		4 hours	Nerita atramentosa	February 14th
31.3	38.1	27.6	32.7	10.5	6.8	3.7	-1.4		4 hours	Nerita atramentosa	February 14th
32.1	36	30.3	33	5.7	3.9	1.8	-0.9		4 hours	Nerita atramentosa	February 14th
24.7	28.8	20.5	23.3	8.3	4.1	4.2	1.4		1 hour	Bembicium nanum	February 28th
24.1	30.3	21.1	24	9.2	6.2	3	0.1		1 hour	Bembicium nanum	February 28th
24.3	31.5	22.3	25.2	9.2	7.2	2	-0.9		1 hour	Bembicium nanum	February 28th
22	27.1	21.1	23	6	5.1	0.9	-1		1 hour	Bembicium nanum	February 28th
21.8	29.2	21.1	23.8	8.1	7.4	0.7	-2		1 hour	Bembicium nanum	February 28th
23	27.8	22.3	24.1	5.5	4.8	0.7	-1.1		1 hour	Bembicium nanum	February 28th
24.8	27.1	21.5	23.7	5.6	2.3	3.3	1.1		1 hour	Bembicium nanum	February 28th
27.9	30.3	24.9	26.9	5.4	2.4	3	1		1 hour	Bembicium nanum	February 28th
25.5	30.1	22	24.2	8.1	4.6	3.5	1.3		1 hour	Bembicium nanum	February 28th
24.4	29.6	23.5	25.5	6.1	5.2	0.9	-1.1		1 hour	Bembicium nanum	February 28th
24.1	26.7	22	23.3	4.7	2.6	2.1	0.8		1 hour	Bembicium nanum	February 28th
25	33.4	23.2	26.2	10.2	8.4	1.8	-1.2		1 hour	Bembicium nanum	February 28th
25.4	31.7	22.7	25.9	9	6.3	2.7	-0.5		1 hour	Bembicium nanum	February 28th
29.3	32.7	22.3	25.8	10.4	3.4	7	3.5		1 hour	Bembicium nanum	February 28th
26.1	32	24.6	27.1	7.4	5.9	1.5	-1		1 hour	Bembicium nanum	February 28th
26.4	33.9	22.2	25.3	11.7	7.5	4.2	1.1		1 hour	Bembicium nanum	February 28th
30.3	34.4	28.7	30.8	5.7	4.1	1.6	-0.5		1 hour	Bembicium nanum	February 28th
24.6	30.7	23.7	25.3	7	6.1	0.9	-0.7		1 hour	Bembicium nanum	February 28th
31	34.3	25.3	28.6	9	3.3	5.7	2.4		1 hour	Bembicium nanum	February 28th
24.4	31.5	22.9	24.7	8.6	7.1	1.5	-0.3		1 hour	Bembicium nanum	February 28th
23.8	33.4	23.4	27.6	10	9.6	0.4	-3.8		1 hour	Bembicium nanum	February 28th
28	34.7	24.7	29.6	10	6.7	3.3	-1.6		1 hour	Bembicium nanum	February 28th
26.1	29.8	23.3	25.7	6.5	3.7	2.8	0.4		1 hour	Bembicium nanum	February 28th
24.1	30.1	23.6	25.2	6.5	6	0.5	-1.1		1 hour	Bembicium nanum	February 28th
27.7	33	23.4	25.4	9.6	5.3	4.3	2.3		1 hour	Bembicium nanum	February 28th
31	36.5	25.5	29.8	11	5.5	5.5	1.2		1 hour	Bembicium nanum	February 28th
28.3	30.6	23.8	26.3	6.8	2.3	4.5	2		1 hour	Bembicium nanum	February 28th
30.2	32.9	23.8	26.2	9.1	2.7	6.4	4		1 hour	Bembicium nanum	February 28th
28.5	33.8	22.1	26.6	11.7	5.3	6.4	1.9		1 hour	Bembicium nanum	February 28th
30	34	23	25.9	11	4	7	4.1		1 hour	Bembicium nanum	February 28th
24	30.6	20.4	23.7	10.2	6.6	3.6	0.3		2 hours	Bembicium nanum	February 28th
30.3	36.5	29.7	32.1	6.8	6.2	0.6	-1.8		2 hours	Bembicium nanum	February 28th
28	34	23.7	26.2	10.3	6	4.3	1.8		2 hours	Bembicium nanum	February 28th
29.7	37.6	29	31.8	8.6	7.9	0.7	-2.1		2 hours	Bembicium nanum	February 28th
32.3	38.7	31	33.7	7.7	6.4	1.3	-1.4		2 hours	Bembicium nanum	February 28th
31	40	29.5	33.8	10.5	9	1.5	-2.8		2 hours	Bembicium nanum	February 28th
29.3	34.2	26.3	28.8	7.9	4.9	3	0.5		2 hours	Bembicium nanum	February 28th
30.1	35.4	28.3	30.8	7.1	5.3	1.8	-0.7		2 hours	Bembicium nanum	February 28th
29.2	37.2	25.9	29.4	11.3	8	3.3	-0.2		2 hours	Bembicium nanum	February 28th
27.5	32.5	26.5	28.5	6	5	1	-1		2 hours	Bembicium nanum	February 28th
33.1	40	27.8	31.8	12.2	6.9	5.3	1.3		2 hours	Bembicium nanum	February 28th
33.3	37.3	28.9	31.9	8.4	4	4.4	1.4		2 hours	Bembicium nanum	February 28th
33.2	39.6	30.3	33.8	9.3	6.4	2.9	-0.6		2 hours	Bembicium nanum	February 28th
35.4	41.2	27.6	32.9	13.6	5.8	7.8	2.5		2 hours	Bembicium nanum	February 28th
28.8	37.3	25.5	30	11.8	8.5	3.3	-1.2		2 hours	Bembicium nanum	February 28th
32.5	39.8	29.9	34	9.9	7.3	2.6	-1.5		2 hours	Bembicium nanum	February 28th
33.5	38.2	26.1	30.2	12.1	4.7	7.4	3.3		2 hours	Bembicium nanum	February 28th
33.9	38.3	29	33	9.3	4.4	4.9	0.9		2 hours	Bembicium nanum	February 28th
28.9	34.3	25.2	29.1	9.1	5.4	3.7	-0.2		2 hours	Bembicium nanum	February 28th
32.3	40.7	31.3	34.1	9.4	8.4	1	-1.8		2 hours	Bembicium nanum	February 28th
32.4	38.9	31.1	33.8	7.8	6.5	1.3	-1.4		2 hours	Bembicium nanum	February 28th
27.9	37.9	26.7	33.7	11.2	10	1.2	-5.8		2 hours	Bembicium nanum	February 28th
34.6	38.8	28.3	32.5	10.5	4.2	6.3	2.1		2 hours	Bembicium nanum	February 28th
34.9	41.9	34.6	37.3	7.3	7	0.3	-2.4		2 hours	Bembicium nanum	February 28th
31.9	39.7	27.5	31.5	12.2	7.8	4.4	0.4		2 hours	Bembicium nanum	February 28th
25.8	37.2	25.3	30.2	11.9	11.4	0.5	-4.4		2 hours	Bembicium nanum	February 28th
33.5	36	26.8	29.4	9.2	2.5	6.7	4.1		2 hours	Bembicium nanum	February 28th
33.4	38.3	31.6	33.1	6.7	4.9	1.8	0.3		2 hours	Bembicium nanum	February 28th
32.3	40.5	26.4	32.8	14.1	8.2	5.9	-0.5		2 hours	Bembicium nanum	February 28th
34	39.8	29.9	34	9.9	5.8	4.1	0		2 hours	Bembicium nanum	February 28th
37.4	41.1	31.3	34.3	9.8	3.7	6.1	3.1		4 hours	Bembicium nanum	February 28th
35.5	38.2	31.3	33.6	6.9	2.7	4.2	1.9		4 hours	Bembicium nanum	February 28th
40.5	46.2	36.3	42.2	9.9	5.7	4.2	-1.7		4 hours	Bembicium nanum	February 28th
41.3	46.7	38.5	41.6	8.2	5.4	2.8	-0.3		4 hours	Bembicium nanum	February 28th
42.6	47.2	38.7	41.1	8.5	4.6	3.9	1.5		4 hours	Bembicium nanum	February 28th
44.2	47.3	39.8	42.7	7.5	3.1	4.4	1.5		4 hours	Bembicium nanum	February 28th
39.4	42.9	30.9	34.8	12	3.5	8.5	4.6		4 hours	Bembicium nanum	February 28th
39.5	44.5	35.3	39	9.2	5	4.2	0.5		4 hours	Bembicium nanum	February 28th
39.5	46.8	30.6	36.5	16.2	7.3	8.9	3		4 hours	Bembicium nanum	February 28th
40.8	45.9	38.6	40.6	7.3	5.1	2.2	0.2		4 hours	Bembicium nanum	February 28th
41.4	46.3	36.7	39.7	9.6	4.9	4.7	1.7		4 hours	Bembicium nanum	February 28th
39.9	47	37.9	40.9	9.1	7.1	2	-1		4 hours	Bembicium nanum	February 28th
43.3	47.3	38.5	42	8.8	4	4.8	1.3		4 hours	Bembicium nanum	February 28th
42.1	49.4	39.5	43.2	9.9	7.3	2.6	-1.1		4 hours	Bembicium nanum	February 28th
41.1	44.3	38.6	40.2	5.7	3.2	2.5	0.9		4 hours	Bembicium nanum	February 28th
35	46.1	34.8	38.5	11.3	11.1	0.2	-3.5		4 hours	Bembicium nanum	February 28th
39.3	46.4	36.5	40.5	9.9	7.1	2.8	-1.2		4 hours	Bembicium nanum	February 28th
35.5	44.8	33.4	36.3	11.4	9.3	2.1	-0.8		4 hours	Bembicium nanum	February 28th
35.6	45.2	34.7	37.9	10.5	9.6	0.9	-2.3		4 hours	Bembicium nanum	February 28th
37.3	42.3	30	36.3	12.3	5	7.3	1		4 hours	Bembicium nanum	February 28th
38.9	46.9	38.1	41.5	8.8	8	0.8	-2.6		4 hours	Bembicium nanum	February 28th
38.8	46.4	35.5	38.8	10.9	7.6	3.3	0		4 hours	Bembicium nanum	February 28th
39.1	46.5	37.8	41.3	8.7	7.4	1.3	-2.2		4 hours	Bembicium nanum	February 28th
38.8	46.8	36	40.8	10.8	8	2.8	-2		4 hours	Bembicium nanum	February 28th
40	48	34.3	40.4	13.7	8	5.7	-0.4		4 hours	Bembicium nanum	February 28th
39.5	43.6	33.8	39.4	9.8	4.1	5.7	0.1		4 hours	Bembicium nanum	February 28th
43.8	48.2	36.2	42.6	12	4.4	7.6	1.2		4 hours	Bembicium nanum	February 28th
39.8	51.7	38.6	43.6	13.1	11.9	1.2	-3.8		4 hours	Bembicium nanum	February 28th
42.9	48.6	36	42.1	12.6	5.7	6.9	0.8		4 hours	Bembicium nanum	February 28th
42.5	48.4	29.4	36.3	19	5.9	13.1	6.2		4 hours	Bembicium nanum	February 28th

## Sheet: Wet v dry
Date	Surface condition	Image number	Time	Oktas	Air temp	Target temp	Species aspect	Species location	Max temp	Max location	Max aspect	Min temp	Min locaton	Min aspect	Average temp	Range	Target - max	Target - min	Average - target
February 26th	Wet	1	11:20am	0	21	22.1	Centre	Flat	30.3	Edge	East	21.3	Flat	Centre	23.9	9	-8.2	0.8	-1.8
February 26th	Wet	2	11:21am	0	21	27.5	Centre	Flat	30.3	Edge	Centre	23.3	Flat	West	27	7	-2.8	4.2	0.5
February 26th	Wet	3	11:22am	0	21	27	Centre	Flat	29.3	Edge	Centre	24.3	Flat	Centre	26.2	5	-2.3	2.7	0.8
February 26th	Wet	4	11:23am	0	21	25.3	Centre	Flat	30.1	Edge	East	21.8	Flat	Centre	24.6	8.3	-4.8	3.5	0.7
February 26th	Dry	5	11:25am	0	21	24.5	West	Flat	34.7	Edge	East	22.9	Edge	West	27.7	11.8	-10.2	1.6	-3.2
February 26th	Wet	6	11:26am	0	21	25.5	Centre	Edge	29.6	Edge	East	22.2	Flat	Centre	25.2	7.4	-4.1	3.3	0.3
February 26th	Dry	7	11:28am	0	21	23.8	Centre	Flat	33.2	Edge	Centre	21.3	Flat	Centre	25.1	11.9	-9.4	2.5	-1.3
February 26th	Dry	8	11:29am	0	21	23.3	Centre	Flat	29.7	Edge	Centre	22.3	Flat	Centre	24.4	7.4	-6.4	1	-1.1
February 26th	Wet	9	11:31am	0	21	22.4	Centre	Flat	32.1	Edge	East	21.3	Flat	Centre	25.3	10.8	-9.7	1.1	-2.9
February 26th	Dry	10	11:32am	0	21	27.7	Centre	Flat	35.8	Edge	East	25.6	Edge	West	29.9	10.2	-8.1	2.1	-2.2
February 26th	Wet	11	11:35am	0	21	23.1	West	Depression	31.3	Edge	East	21.1	Flat	Centre	24.8	10.2	-8.2	2	-1.7
February 26th	Wet	12	11:36am	0	21	26.8	East	Edge	30.1	Edge	West	23.3	Flat	Centre	26	6.8	-3.3	3.5	0.8
February 26th	Wet	13	11:37am	0	21	26.1	West	Edge	32.8	Edge	Centre	25	Flat	Centre	27.6	7.8	-6.7	1.1	-1.5
February 26th	Wet	14	11:39am	0	21	27.8	Centre	Flat	34.1	Edge	East	25.7	Edge	Centre	29.9	8.4	-6.3	2.1	-2.1
February 26th	Dry	15	11:40am	0	21	22.9	West	Edge	31.7	Edge	East	20.7	Flat	Centre	24.4	11	-8.8	2.2	-1.5
February 26th	Dry	16	11:41am	0	21	24.6	Centre	Flat	33.9	Edge	Centre	23.1	Flat	West	26.6	10.8	-9.3	1.5	-2
February 26th	Wet	17	11:42am	0	21	23.6	Centre	Flat	30.8	Edge	East	22.2	Flat	Centre	25.2	8.6	-7.2	1.4	-1.6
February 26th	Dry	18	11:43am	0	21	26.3	Centre	Flat	34.9	Edge	East	23	Flat	Centre	27.4	11.9	-8.6	3.3	-1.1
February 26th	Wet	19	11:45am	0	21	23.6	Centre	Flat	29.6	Edge	East	22.2	Flat	West	25.7	7.4	-6	1.4	-2.1
February 26th	Dry	20	11:46am	0	21	23.1	West	Edge	31.7	Edge	Centre	20.8	Edge	Centre	25.6	10.9	-8.6	2.3	-2.5
February 26th	Wet	21	11:47am	0	21	28	West	Flat	34.8	Edge	East	26.1	Edge	West	29.4	8.7	-6.8	1.9	-1.4
February 26th	Dry	23	11:49am	0	21	25.9	Centre	Flat	32.7	Edge	East	22.9	Flat	Centre	26.3	9.8	-6.8	3	-0.4
February 26th	Dry	24	11:50am	0	21	29	Centre	Flat	34.2	Depression	Centre	26.2	Flat	Centre	29.5	8	-5.2	2.8	-0.5
February 26th	Wet	25	11:52am	0	21	25.4	Centre	Flat	32.7	Edge	East	22.6	Flat	Centre	27.4	10.1	-7.3	2.8	-2
February 26th	Wet	26	11:53am	0	21	29.4	Centre	Edge	31.6	Edge	East	23.2	Flat	Centre	27.2	8.4	-2.2	6.2	2.2
February 26th	Dry	27	11:54am	0	21	26	Centre	Flat	33.2	Edge	East	22.8	Flat	Centre	27.3	10.4	-7.2	3.2	-1.3
February 26th	Wet	28	11:56am	0	21	22.1	East	Flat	30.3	Edge	West	22	Flat	East	25.3	8.3	-8.2	0.1	-3.2
February 26th	Wet	29	11:57am	0	21	25.7	East	Edge	33.3	Edge	West	23.8	Edge	East	26.9	9.5	-7.6	1.9	-1.2
February 26th	Wet	30	11:58am	0	21	29.9	East	Flat	33.6	Edge	East	24	Flat	Centre	26.8	9.6	-3.7	5.9	3.1
February 26th	Dry	31	12:00pm	0	21	26.5	Centre	Flat	33.2	Edge	East	24.3	Flat	Centre	27.9	8.9	-6.7	2.2	-1.4
February 26th	Dry	32	12:09pm	0	21	23.7	Centre	Flat	30.3	Edge	Centre	21.2	Flat	Centre	25.2	9.1	-6.6	2.5	-1.5
February 26th	Dry	33	12:10pm	0	22	27.6	West	Flat	38	Edge	East	26.7	Flat	West	30.9	11.3	-10.4	0.9	-3.3
February 26th	Wet	34	12:11pm	0	22	29.9	Centre	Flat	37.1	Edge	East	24	Flat	Centre	28.2	13.1	-7.2	5.9	1.7
February 26th	Dry	35	12:13pm	0	22	31.8	Centre	Flat	36.8	Edge	East	27.3	Flat	Centre	30.3	9.5	-5	4.5	1.5
February 26th	Dry	36	12:14pm	0	22	28.6	East	Flat	37.9	Edge	West	27.9	Flat	East	32.3	10	-9.3	0.7	-3.7
February 26th	Dry	37	12:15pm	0	22	35	Centre	Flat	39.3	Edge	Centre	33	Flat	East	35.8	6.3	-4.3	2	-0.8
February 26th	Dry	38	12:16pm	0	22	30.6	Centre	Flat	41	Edge	Centre	28.7	Flat	West	33.3	12.3	-10.4	1.9	-2.7
February 26th	Wet	39	12:17pm	0	22	25.8	Centre	Flat	32.8	Edge	East	22.4	Flat	West	27.4	10.4	-7	3.4	-1.6
February 26th	Dry	40	12:18pm	0	22	27.6	Centre	Flat	37	Depression	Centre	25.1	Edge	Centre	29.8	11.9	-9.4	2.5	-2.2
February 26th	Dry	41	12:20pm	0	22	27.5	West	Edge	30.3	Edge	Centre	25.4	Flat	Centre	27.5	4.9	-2.8	2.1	0
February 26th	Dry	42	12:20pm	0	22	26.8	Centre	Flat	36.2	Edge	East	26.2	Flat	West	29.3	10	-9.4	0.6	-2.5
February 26th	Dry	43	12:22pm	0	22	30.4	Centre	Edge	36.4	Edge	East	23.5	Edge	West	28.5	12.9	-6	6.9	1.9
February 26th	Dry	44	12:22pm	0	22	27.5	Centre	Flat	37.2	Edge	Centre	23.9	Flat	Centre	29.8	13.3	-9.7	3.6	-2.3
February 26th	Wet	45	12:23pm	0	22	27.3	Centre	Flat	33.8	Edge	West	24	Edge	Centre	28.9	9.8	-6.5	3.3	-1.6
February 26th	Wet	46	12:26pm	0	22	26.9	West	Flat	38.5	Edge	Centre	23.8	Flat	Centre	30.1	14.7	-11.6	3.1	-3.2
February 26th	Dry	47	12:27pm	0	22	33.8	West	Edge	37	Edge	West	30.8	Flat	Centre	33.6	6.2	-3.2	3	0.2
February 26th	Dry	48	12:28pm	0	22	31.7	Centre	Flat	38.6	Edge	Centre	27.7	Edge	Centre	32.5	10.9	-6.9	4	-0.8
February 26th	Wet	49	12:29pm	0	22	29.1	Centre	Flat	37.6	Edge	Centre	27.1	Flat	Centre	30.8	10.5	-8.5	2	-1.7
February 26th	Dry	50	12:30pm	0	22	26.9	Centre	Edge	31.7	Edge	East	26.2	Flat	Centre	27.8	5.5	-4.8	0.7	-0.9
February 26th	Wet	51	12:32pm	0	22	27.2	Centre	Flat	30.8	Edge	East	25.1	Flat	Centre	27.6	5.7	-3.6	2.1	-0.4
February 26th	Wet	52	12:33pm	0	22	27.5	East	Edge	36.3	Edge	Centre	23.9	Edge	West	29.7	12.4	-8.8	3.6	-2.2
February 26th	Dry	53	12:34pm	0	22	31.5	Centre	Flat	37.6	Edge	West	26.3	Flat	Centre	31.2	11.3	-6.1	5.2	0.3
February 26th	Dry	54	12:35pm	0	22	26.3	West	Flat	31.8	Edge	Centre	24	Flat	Centre	27.3	7.8	-5.5	2.3	-1
February 26th	Wet	55	12:36pm	0	22	29.8	Centre	Edge	36.3	Edge	West	28.3	Edge	East	31.3	8	-6.5	1.5	-1.5
February 26th	Wet	56	12:37pm	0	22	28.3	Centre	Flat	37.5	Depression	Centre	26.6	Flat	East	30.9	10.9	-9.2	1.7	-2.6
February 26th	Wet	57	12:38pm	0	22	33	West	Edge	40.9	Edge	East	28.5	Edge	Centre	33.9	12.4	-7.9	4.5	-0.9
February 26th	Dry	58	12:40pm	0	22	33.9	Centre	Flat	38.6	Edge	East	28.3	Peak	West	32	10.3	-4.7	5.6	1.9
February 26th	Wet	59	12:41pm	0	22	29.1	Centre	Flat	37.7	Edge	Centre	26	Edge	West	30.3	11.7	-8.6	3.1	-1.2
February 26th	Wet	60	12:42pm	0	22	28.3	Centre	Flat	34.8	Edge	West	26	Flat	East	29.2	8.8	-6.5	2.3	-0.9
February 26th	Dry	68	12:50pm	0	22	28.9	Centre	Flat	41.2	Edge	Centre	28.3	Flat	Centre	33	12.9	-12.3	0.6	-4.1
February 27th	Wet	1	11:45am	0	26	26.1	Centre	Edge	31	Edge	East	24.3	Flat	Centre	26.5	6.7	-4.9	1.8	-0.4
February 27th	Dry	2	11:46am	0	26	28.3	West	Flat	34.7	Edge	Centre	26.9	Edge	West	30.2	7.8	-6.4	1.4	-1.9
February 27th	Dry	3	11:47am	0	26	26.3	East	Flat	29.7	Edge	Centre	24.3	Flat	Centre	26.8	5.4	-3.4	2	-0.5
February 27th	Dry	4	11:49am	0	26	27.3	Centre	Flat	37.9	Edge	Centre	25.3	Flat	Centre	29.1	12.6	-10.6	2	-1.8
February 27th	Wet	5	11:50am	0	26	28.1	Centre	Flat	33.6	Edge	West	25.9	Flat	East	28.3	7.7	-5.5	2.2	-0.2
February 27th	Wet	6	11:51am	0	26	28.6	Centre	Flat	39.8	Edge	Centre	25.9	Flat	West	32.8	13.9	-11.2	2.7	-4.2
February 27th	Dry	7	11:53am	0	26	29.2	Centre	Flat	37.5	Edge	East	27.1	Edge	West	30.8	10.4	-8.3	2.1	-1.6
February 27th	Wet	8	11:54am	0	26	26	Centre	Flat	34.9	Edge	Centre	24.1	Flat	Centre	27.9	10.8	-8.9	1.9	-1.9
February 27th	Wet	9	11:55am	0	26	32.2	East	Flat	38.4	Edge	Centre	28.1	Flat	Centre	31.9	10.3	-6.2	4.1	0.3
February 27th	Wet	10	11:56am	0	26	29.9	East	Flat	37.4	Edge	Centre	26.8	Edge	Centre	31.3	10.6	-7.5	3.1	-1.4
February 27th	Wet	11	11:58am	0	26	25.9	Centre	Flat	30.9	Edge	East	25.2	Flat	Centre	27.3	5.7	-5	0.7	-1.4
February 27th	Wet	12	12:01pm	0	26	28.3	Centre	Flat	34.7	Edge	West	26.5	Flat	Centre	29	8.2	-6.4	1.8	-0.7
February 27th	Wet	13	12:01pm	0	26	30.1	Centre	Edge	37.3	Edge	East	28.5	Flat	West	31.6	8.8	-7.2	1.6	-1.5
February 27th	Wet	14	12:04pm	0	26	29.8	Centre	Flat	33.7	Edge	East	25.7	Flat	Centre	29.6	8	-3.9	4.1	0.2
February 27th	Wet	15	12:05pm	0	26	29.7	Centre	Flat	36.8	Edge	East	26.1	Flat	West	30.2	10.7	-7.1	3.6	-0.5
February 27th	Wet	16	12:06pm	0	26	28.5	Centre	Flat	34.4	Edge	Centre	25.8	Flat	East	29.7	8.6	-5.9	2.7	-1.2
February 27th	Wet	17	12:08pm	0	26	27.8	Centre	Flat	35	Edge	East	27.1	Flat	Centre	29.9	7.9	-7.2	0.7	-2.1
February 27th	Wet	18	12:09pm	0	26	28.1	Centre	Edge	34.7	Edge	Centre	26.9	Edge	Centre	30.5	7.8	-6.6	1.2	-2.4
February 27th	Wet	19	12:11pm	0	26	28.6	Centre	Flat	39.4	Edge	Centre	26.1	Peak	Centre	30.9	13.3	-10.8	2.5	-2.3
February 27th	Wet	20	12:14pm	0	26	30	East	Flat	32.6	Edge	Centre	27.7	Edge	West	29.8	4.9	-2.6	2.3	0.2
February 27th	Dry	21	12:15pm	0	26	28.7	Centre	Flat	33.2	Edge	Centre	25	Edge	East	28.4	8.2	-4.5	3.7	0.3
February 27th	Wet	22	12:18pm	0	26	30.4	West	Edge	33.4	Edge	East	26.8	Edge	Centre	28.7	6.6	-3	3.6	1.7
February 27th	Wet	23	12:19pm	0	26	28.9	West	Depression	39.4	Edge	East	27.1	Edge	West	31.6	12.3	-10.5	1.8	-2.7
February 27th	Wet	24	12:21pm	0	26	28.5	East	Depression	32.8	Edge	Centre	25.9	Edge	Centre	29.2	6.9	-4.3	2.6	-0.7
February 27th	Dry	25	12:22pm	0	26	31.4	Centre	Flat	34.9	Edge	Centre	29.7	Flat	Centre	31.8	5.2	-3.5	1.7	-0.4
February 27th	Wet	26	12:23pm	0	26	27.3	Centre	Flat	33.3	Edge	East	26.8	Flat	Centre	29.1	6.5	-6	0.5	-1.8
February 27th	Dry	27	12:24pm	0	26	31.3	Centre	Flat	38.7	Edge	West	30.2	Flat	Centre	34.1	8.5	-7.4	1.1	-2.8
February 27th	Dry	28	12:25pm	0	26	30.4	Centre	Flat	38.5	Edge	East	29.6	Edge	West	32.5	8.9	-8.1	0.8	-2.1
February 27th	Dry	29	12:27pm	0	26	32.6	Centre	Flat	36.8	Edge	Centre	28.4	Flat	West	32.2	8.4	-4.2	4.2	0.4
February 27th	Dry	30	12:28pm	0	26	31.6	West	Flat	37.2	Edge	East	30.7	Flat	Centre	33	6.5	-5.6	0.9	-1.4
February 27th	Wet	31	12:35pm	0	27	30	Centre	Flat	35.6	Edge	East	28.7	Flat	Centre	31.3	6.9	-5.6	1.3	-1.3
February 27th	Wet	32	12:37pm	0	27	35.3	Centre	Flat	39.9	Edge	Centre	33.1	Edge	Centre	35.4	6.8	-4.6	2.2	-0.1
February 27th	Dry	33	12:38pm	0	27	30.9	East	Edge	36.5	Edge	Centre	29	Edge	East	31.7	7.5	-5.6	1.9	-0.8
February 27th	Wet	34	12:41pm	0	27	35.2	Centre	Flat	41.3	Edge	West	32.6	Flat	East	36	8.7	-6.1	2.6	-0.8
February 27th	Wet	35	12:43pm	0	27	33.3	Centre	Flat	41.3	Edge	East	31.7	Flat	West	34.8	9.6	-8	1.6	-1.5
February 27th	Dry	36	12:43pm	0	27	33.8	Centre	Flat	40.1	Edge	Centre	31.8	Edge	Centre	34.2	8.3	-6.3	2	-0.4
February 27th	Dry	37	12:44pm	0	27	32	Centre	Flat	38.1	Edge	West	30	Flat	Centre	33.7	8.1	-6.1	2	-1.7
February 27th	Dry	38	12:46pm	0	27	30.7	Centre	Flat	36.4	Edge	East	29	Flat	Centre	32.1	7.4	-5.7	1.7	-1.4
February 27th	Wet	39	12:47pm	0	27	29.4	Centre	Flat	37.6	Edge	East	25.2	Flat	Centre	30.5	12.4	-8.2	4.2	-1.1
February 27th	Wet	40	12:48pm	0	27	29.2	West	Flat	31.5	Edge	East	27.9	Flat	Centre	29.3	3.6	-2.3	1.3	-0.1
February 27th	Dry	41	12:49pm	0	27	30.8	West	Flat	37.2	Edge	East	28.1	Flat	West	32.7	9.1	-6.4	2.7	-1.9
February 27th	Dry	42	12:50pm	0	27	30.8	Centre	Flat	38.2	Edge	Centre	29.1	Depression	East	32.1	9.1	-7.4	1.7	-1.3
February 27th	Dry	43	12:52pm	0	27	30.5	East	Edge	39	Edge	West	29.6	Edge	East	34.1	9.4	-8.5	0.9	-3.6
February 27th	Dry	44	12:53pm	0	27	31.1	Centre	Flat	34.9	Edge	West	29.3	Flat	East	31.5	5.6	-3.8	1.8	-0.4
February 27th	Wet	45	12:54pm	0	27	31.7	West	Edge	38.8	Edge	East	29.5	Edge	West	33.4	9.3	-7.1	2.2	-1.7
February 27th	Dry	46	12:56pm	0	27	35.7	Centre	Flat	41.4	Edge	Centre	31.3	Flat	Centre	35.5	10.1	-5.7	4.4	0.2
February 27th	Dry	47	12:57pm	0	27	31.5	East	Flat	36.1	Edge	Centre	29.5	Edge	Centre	32.4	6.6	-4.6	2	-0.9
February 27th	Wet	48	1:00pm	0	27	30.9	Centre	Flat	35.4	Edge	East	28.6	Peak	East	32.1	6.8	-4.5	2.3	-1.2
February 27th	Wet	49	1:01pm	0	27	32.9	Centre	Flat	39.7	Flat	East	29.7	Edge	West	34	10	-6.8	3.2	-1.1
February 27th	Dry	50	1:03pm	0	27	32.5	West	Edge	38.3	Edge	West	28.9	Flat	Centre	33.2	9.4	-5.8	3.6	-0.7
February 27th	Wet	51	1:04pm	0	27	32.7	East	Depression	38.2	Edge	West	30.3	Flat	East	33.7	7.9	-5.5	2.4	-1
February 27th	Dry	52	1:06pm	0	27	33.1	Centre	Flat	36	Edge	Centre	31.5	Flat	West	33.6	4.5	-2.9	1.6	-0.5
February 27th	Dry	53	1:09pm	0	27	29	Centre	Flat	33.3	Edge	West	25.7	Flat	Centre	29.5	7.6	-4.3	3.3	-0.5
February 27th	Dry	54	1:10pm	0	27	36.8	Centre	Flat	42.4	Edge	West	34.2	Flat	Centre	37.4	8.2	-5.6	2.6	-0.6
February 27th	Dry	55	1:11pm	0	27	27.7	East	Edge	38.3	Edge	Centre	26.7	Flat	East	32.1	11.6	-10.6	1	-4.4
February 27th	Dry	56	1:12pm	0	27	33.6	East	Flat	39.1	Edge	East	29.8	Flat	Centre	34	9.3	-5.5	3.8	-0.4
February 27th	Dry	57	1:13pm	0	27	33.2	Centre	Flat	39.2	Edge	East	27.6	Flat	Centre	34.6	11.6	-6	5.6	-1.4
February 27th	Dry	58	1:15pm	0	27	31.8	Centre	Flat	42.4	Edge	Centre	30.9	Edge	Centre	35.6	11.5	-10.6	0.9	-3.8
February 27th	Dry	59	1:16pm	0	27	33.8	East	Flat	39.2	Edge	Centre	33.1	Flat	East	35.8	6.1	-5.4	0.7	-2
February 27th	Dry	60	1:17pm	0	27	33	East	Flat	39	Edge	Centre	29	Flat	East	33.8	10	-6	4	-0.8

## Sheet: PRIMER wet v dry
Target temp	Max temp	Min temp	Average temp	Range	Max - target	Target - min	Target - average		Date	Surface condition	Oktas
22.1	30.3	21.3	23.9	9	8.2	0.8	-1.8		February 26th	Wet	0
27.5	30.3	23.3	27	7	2.8	4.2	0.5		February 26th	Wet	0
27	29.3	24.3	26.2	5	2.3	2.7	0.8		February 26th	Wet	0
25.3	30.1	21.8	24.6	8.3	4.8	3.5	0.7		February 26th	Wet	0
24.5	34.7	22.9	27.7	11.8	10.2	1.6	-3.2		February 26th	Dry	0
25.5	29.6	22.2	25.2	7.4	4.1	3.3	0.3		February 26th	Wet	0
23.8	33.2	21.3	25.1	11.9	9.4	2.5	-1.3		February 26th	Dry	0
23.3	29.7	22.3	24.4	7.4	6.4	1	-1.1		February 26th	Dry	0
22.4	32.1	21.3	25.3	10.8	9.7	1.1	-2.9		February 26th	Wet	0
27.7	35.8	25.6	29.9	10.2	8.1	2.1	-2.2		February 26th	Dry	0
23.1	31.3	21.1	24.8	10.2	8.2	2	-1.7		February 26th	Wet	0
26.8	30.1	23.3	26	6.8	3.3	3.5	0.8		February 26th	Wet	0
26.1	32.8	25	27.6	7.8	6.7	1.1	-1.5		February 26th	Wet	0
27.8	34.1	25.7	29.9	8.4	6.3	2.1	-2.1		February 26th	Wet	0
22.9	31.7	20.7	24.4	11	8.8	2.2	-1.5		February 26th	Dry	0
24.6	33.9	23.1	26.6	10.8	9.3	1.5	-2		February 26th	Dry	0
23.6	30.8	22.2	25.2	8.6	7.2	1.4	-1.6		February 26th	Wet	0
26.3	34.9	23	27.4	11.9	8.6	3.3	-1.1		February 26th	Dry	0
23.6	29.6	22.2	25.7	7.4	6	1.4	-2.1		February 26th	Wet	0
23.1	31.7	20.8	25.6	10.9	8.6	2.3	-2.5		February 26th	Dry	0
28	34.8	26.1	29.4	8.7	6.8	1.9	-1.4		February 26th	Wet	0
25.9	32.7	22.9	26.3	9.8	6.8	3	-0.4		February 26th	Dry	0
29	34.2	26.2	29.5	8	5.2	2.8	-0.5		February 26th	Dry	0
25.4	32.7	22.6	27.4	10.1	7.3	2.8	-2		February 26th	Wet	0
29.4	31.6	23.2	27.2	8.4	2.2	6.2	2.2		February 26th	Wet	0
26	33.2	22.8	27.3	10.4	7.2	3.2	-1.3		February 26th	Dry	0
22.1	30.3	22	25.3	8.3	8.2	0.1	-3.2		February 26th	Wet	0
25.7	33.3	23.8	26.9	9.5	7.6	1.9	-1.2		February 26th	Wet	0
29.9	33.6	24	26.8	9.6	3.7	5.9	3.1		February 26th	Wet	0
26.5	33.2	24.3	27.9	8.9	6.7	2.2	-1.4		February 26th	Dry	0
23.7	30.3	21.2	25.2	9.1	6.6	2.5	-1.5		February 26th	Dry	0
27.6	38	26.7	30.9	11.3	10.4	0.9	-3.3		February 26th	Dry	0
29.9	37.1	24	28.2	13.1	7.2	5.9	1.7		February 26th	Wet	0
31.8	36.8	27.3	30.3	9.5	5	4.5	1.5		February 26th	Dry	0
28.6	37.9	27.9	32.3	10	9.3	0.7	-3.7		February 26th	Dry	0
35	39.3	33	35.8	6.3	4.3	2	-0.8		February 26th	Dry	0
30.6	41	28.7	33.3	12.3	10.4	1.9	-2.7		February 26th	Dry	0
25.8	32.8	22.4	27.4	10.4	7	3.4	-1.6		February 26th	Wet	0
27.6	37	25.1	29.8	11.9	9.4	2.5	-2.2		February 26th	Dry	0
27.5	30.3	25.4	27.5	4.9	2.8	2.1	0		February 26th	Dry	0
26.8	36.2	26.2	29.3	10	9.4	0.6	-2.5		February 26th	Dry	0
30.4	36.4	23.5	28.5	12.9	6	6.9	1.9		February 26th	Dry	0
27.5	37.2	23.9	29.8	13.3	9.7	3.6	-2.3		February 26th	Dry	0
27.3	33.8	24	28.9	9.8	6.5	3.3	-1.6		February 26th	Wet	0
26.9	38.5	23.8	30.1	14.7	11.6	3.1	-3.2		February 26th	Wet	0
33.8	37	30.8	33.6	6.2	3.2	3	0.2		February 26th	Dry	0
31.7	38.6	27.7	32.5	10.9	6.9	4	-0.8		February 26th	Dry	0
29.1	37.6	27.1	30.8	10.5	8.5	2	-1.7		February 26th	Wet	0
26.9	31.7	26.2	27.8	5.5	4.8	0.7	-0.9		February 26th	Dry	0
27.2	30.8	25.1	27.6	5.7	3.6	2.1	-0.4		February 26th	Wet	0
27.5	36.3	23.9	29.7	12.4	8.8	3.6	-2.2		February 26th	Wet	0
31.5	37.6	26.3	31.2	11.3	6.1	5.2	0.3		February 26th	Dry	0
26.3	31.8	24	27.3	7.8	5.5	2.3	-1		February 26th	Dry	0
29.8	36.3	28.3	31.3	8	6.5	1.5	-1.5		February 26th	Wet	0
28.3	37.5	26.6	30.9	10.9	9.2	1.7	-2.6		February 26th	Wet	0
33	40.9	28.5	33.9	12.4	7.9	4.5	-0.9		February 26th	Wet	0
33.9	38.6	28.3	32	10.3	4.7	5.6	1.9		February 26th	Dry	0
29.1	37.7	26	30.3	11.7	8.6	3.1	-1.2		February 26th	Wet	0
28.3	34.8	26	29.2	8.8	6.5	2.3	-0.9		February 26th	Wet	0
28.9	41.2	28.3	33	12.9	12.3	0.6	-4.1		February 26th	Dry	0
26.1	31	24.3	26.5	6.7	4.9	1.8	-0.4		February 27th	Wet	0
28.3	34.7	26.9	30.2	7.8	6.4	1.4	-1.9		February 27th	Dry	0
26.3	29.7	24.3	26.8	5.4	3.4	2	-0.5		February 27th	Dry	0
27.3	37.9	25.3	29.1	12.6	10.6	2	-1.8		February 27th	Dry	0
28.1	33.6	25.9	28.3	7.7	5.5	2.2	-0.2		February 27th	Wet	0
28.6	39.8	25.9	32.8	13.9	11.2	2.7	-4.2		February 27th	Wet	0
29.2	37.5	27.1	30.8	10.4	8.3	2.1	-1.6		February 27th	Dry	0
26	34.9	24.1	27.9	10.8	8.9	1.9	-1.9		February 27th	Wet	0
32.2	38.4	28.1	31.9	10.3	6.2	4.1	0.3		February 27th	Wet	0
29.9	37.4	26.8	31.3	10.6	7.5	3.1	-1.4		February 27th	Wet	0
25.9	30.9	25.2	27.3	5.7	5	0.7	-1.4		February 27th	Wet	0
28.3	34.7	26.5	29	8.2	6.4	1.8	-0.7		February 27th	Wet	0
30.1	37.3	28.5	31.6	8.8	7.2	1.6	-1.5		February 27th	Wet	0
29.8	33.7	25.7	29.6	8	3.9	4.1	0.2		February 27th	Wet	0
29.7	36.8	26.1	30.2	10.7	7.1	3.6	-0.5		February 27th	Wet	0
28.5	34.4	25.8	29.7	8.6	5.9	2.7	-1.2		February 27th	Wet	0
27.8	35	27.1	29.9	7.9	7.2	0.7	-2.1		February 27th	Wet	0
28.1	34.7	26.9	30.5	7.8	6.6	1.2	-2.4		February 27th	Wet	0
28.6	39.4	26.1	30.9	13.3	10.8	2.5	-2.3		February 27th	Wet	0
30	32.6	27.7	29.8	4.9	2.6	2.3	0.2		February 27th	Wet	0
28.7	33.2	25	28.4	8.2	4.5	3.7	0.3		February 27th	Dry	0
30.4	33.4	26.8	28.7	6.6	3	3.6	1.7		February 27th	Wet	0
28.9	39.4	27.1	31.6	12.3	10.5	1.8	-2.7		February 27th	Wet	0
28.5	32.8	25.9	29.2	6.9	4.3	2.6	-0.7		February 27th	Wet	0
31.4	34.9	29.7	31.8	5.2	3.5	1.7	-0.4		February 27th	Dry	0
27.3	33.3	26.8	29.1	6.5	6	0.5	-1.8		February 27th	Wet	0
31.3	38.7	30.2	34.1	8.5	7.4	1.1	-2.8		February 27th	Dry	0
30.4	38.5	29.6	32.5	8.9	8.1	0.8	-2.1		February 27th	Dry	0
32.6	36.8	28.4	32.2	8.4	4.2	4.2	0.4		February 27th	Dry	0
31.6	37.2	30.7	33	6.5	5.6	0.9	-1.4		February 27th	Dry	0
30	35.6	28.7	31.3	6.9	5.6	1.3	-1.3		February 27th	Wet	0
35.3	39.9	33.1	35.4	6.8	4.6	2.2	-0.1		February 27th	Wet	0
30.9	36.5	29	31.7	7.5	5.6	1.9	-0.8		February 27th	Dry	0
35.2	41.3	32.6	36	8.7	6.1	2.6	-0.8		February 27th	Wet	0
33.3	41.3	31.7	34.8	9.6	8	1.6	-1.5		February 27th	Wet	0
33.8	40.1	31.8	34.2	8.3	6.3	2	-0.4		February 27th	Dry	0
32	38.1	30	33.7	8.1	6.1	2	-1.7		February 27th	Dry	0
30.7	36.4	29	32.1	7.4	5.7	1.7	-1.4		February 27th	Dry	0
29.4	37.6	25.2	30.5	12.4	8.2	4.2	-1.1		February 27th	Wet	0
29.2	31.5	27.9	29.3	3.6	2.3	1.3	-0.1		February 27th	Wet	0
30.8	37.2	28.1	32.7	9.1	6.4	2.7	-1.9		February 27th	Dry	0
30.8	38.2	29.1	32.1	9.1	7.4	1.7	-1.3		February 27th	Dry	0
30.5	39	29.6	34.1	9.4	8.5	0.9	-3.6		February 27th	Dry	0
31.1	34.9	29.3	31.5	5.6	3.8	1.8	-0.4		February 27th	Dry	0
31.7	38.8	29.5	33.4	9.3	7.1	2.2	-1.7		February 27th	Wet	0
35.7	41.4	31.3	35.5	10.1	5.7	4.4	0.2		February 27th	Dry	0
31.5	36.1	29.5	32.4	6.6	4.6	2	-0.9		February 27th	Dry	0
30.9	35.4	28.6	32.1	6.8	4.5	2.3	-1.2		February 27th	Wet	0
32.9	39.7	29.7	34	10	6.8	3.2	-1.1		February 27th	Wet	0
32.5	38.3	28.9	33.2	9.4	5.8	3.6	-0.7		February 27th	Dry	0
32.7	38.2	30.3	33.7	7.9	5.5	2.4	-1		February 27th	Wet	0
33.1	36	31.5	33.6	4.5	2.9	1.6	-0.5		February 27th	Dry	0
29	33.3	25.7	29.5	7.6	4.3	3.3	-0.5		February 27th	Dry	0
36.8	42.4	34.2	37.4	8.2	5.6	2.6	-0.6		February 27th	Dry	0
27.7	38.3	26.7	32.1	11.6	10.6	1	-4.4		February 27th	Dry	0
33.6	39.1	29.8	34	9.3	5.5	3.8	-0.4		February 27th	Dry	0
33.2	39.2	27.6	34.6	11.6	6	5.6	-1.4		February 27th	Dry	0
31.8	42.4	30.9	35.6	11.5	10.6	0.9	-3.8		February 27th	Dry	0
33.8	39.2	33.1	35.8	6.1	5.4	0.7	-2		February 27th	Dry	0
33	39	29	33.8	10	6	4	-0.8		February 27th	Dry	0

## Sheet: Thermal mosaics
Seashore	Date	Temp ranking	Thermal image	Unique	Time	Air temp	Oktas	Zone	Species	Surface condition	Target temp	Species aspect	Species location	Max temp	Max location	Max aspect	Min temp	Min locaton	Min aspect	Average temp	Range	Max - target	Min - target	Average - target	Target - max	Target - min	Target - average
Marino Rocks	December 16	2	1	Yes	12:41pm	24	0	Lower	Nerita atramentosa	Wet	27.4	Centre	Flat	35.8	Edge	West	26.2	Edge	East	29.2	9.6	8.4	-1.2	1.8	-8.4	1.2	-1.8
Marino Rocks	December 16	2	2	Yes	12:43pm	24	0	Lower	Nerita atramentosa	Wet	30.8	East	Edge	38.3	Edge	West	28.3	Edge	East	33.8	10	7.5	-2.5	3	-7.5	2.5	-3
Marino Rocks	December 16	2	3	Yes	12:47pm	24	0	Lower	Nerita atramentosa	Wet	31.7	Centre	Flat	37.7	Edge	West	26.9	Edge	East	31.1	10.8	6	-4.8	-0.6	-6	4.8	0.6
Marino Rocks	December 16	2	4	Yes	12:48pm	24	0	Lower	Nerita atramentosa	Wet	29.7	West	Edge	36	Edge	East	25.6	Flat	Centre	30.8	10.4	6.3	-4.1	1.1	-6.3	4.1	-1.1
Marino Rocks	December 16	2	5	Yes	12:51pm	24	0	Lower	Nerita atramentosa	Dry	31.9	Centre	Flat	41.1	Edge	West	27.3	Flat	East	32.1	13.8	9.2	-4.6	0.2	-9.2	4.6	-0.2
Marino Rocks	December 16	2	7	Yes	12:59pm	24	0	Lower	Nerita atramentosa	Wet	31.8	Centre	Flat	37.8	Edge	West	26.1	Edge	East	32	11.7	6	-5.7	0.2	-6	5.7	-0.2
Marino Rocks	December 16	2	11	Yes	1:06pm	24	0	Lower	Nerita atramentosa	Wet	34.7	Centre	Flat	40.5	Edge	West	28.3	Edge	East	34.3	12.2	5.8	-6.4	-0.4	-5.8	6.4	0.4
Marino Rocks	December 16	2	9	Yes	1:02pm	24	0	Lower	Nerita atramentosa	Dry	31.8	Centre	Flat	37.2	Edge	West	26.3	Edge	East	32.2	10.9	5.4	-5.5	0.4	-5.4	5.5	-0.4
Marino Rocks	December 16	2	10	Yes	1:04pm	24	0	Lower	Nerita atramentosa	Wet	31.3	Centre	Flat	40.2	Edge	West	30.2	Flat	Centre	34.7	10	8.9	-1.1	3.4	-8.9	1.1	-3.4
Marino Rocks	December 16	2	12	Yes	1:09pm	24	0	Lower	Nerita atramentosa	Dry	32.1	East	Edge	37.5	Edge	East	23.4	Flat	Centre	30.8	14.1	5.4	-8.7	-1.3	-5.4	8.7	1.3
Marino Rocks	December 16	2	13	Yes	1:11pm	24	0	Lower	Nerita atramentosa	Dry	31.6	Centre	Flat	38.9	Edge	West	25.8	Flat	Centre	33.1	13.1	7.3	-5.8	1.5	-7.3	5.8	-1.5
Marino Rocks	December 16	2	14	Yes	1:12pm	24	0	Lower	Nerita atramentosa	Wet	27.6	East	Flat	37.1	Edge	Centre	25	Flat	Centre	29.9	12.1	9.5	-2.6	2.3	-9.5	2.6	-2.3
Marino Rocks	December 16	2	15	Yes	1:14pm	24	0	Lower	Nerita atramentosa	Wet	30.1	East	Edge	33.2	Edge	West	25.4	Flat	Centre	28.7	7.8	3.1	-4.7	-1.4	-3.1	4.7	1.4
Marino Rocks	December 16	2	16	Yes	1:17pm	24	0	Lower	Nerita atramentosa	Wet	30.1	Centre	Flat	42.6	Edge	West	27	Edge	East	34.1	15.6	12.5	-3.1	4	-12.5	3.1	-4
Marino Rocks	December 16	2	17	Yes	1:18pm	24	0	Lower	Nerita atramentosa	Dry	37.4	Centre	Edge	41.9	Edge	East	31.8	Flat	Centre	32.5	10.1	4.5	-5.6	-4.9	-4.5	5.6	4.9
Marino Rocks	December 16	2	18	Yes	1:20pm	24	0	Lower	Nerita atramentosa	Wet	30.1	East	Edge	39.7	Edge	West	22.9	Flat	Centre	30.8	16.8	9.6	-7.2	0.7	-9.6	7.2	-0.7
Marino Rocks	December 16	2	19	Yes	1:21pm	24	0	Lower	Nerita atramentosa	Wet	30.8	Centre	Edge	40	Edge	West	25.2	Edge	East	31	14.8	9.2	-5.6	0.2	-9.2	5.6	-0.2
Marino Rocks	December 16	2	20	Yes	1:22pm	24	0	Lower	Nerita atramentosa	Dry	31.8	East	Edge	40.3	Edge	West	26	Flat	Centre	32	14.3	8.5	-5.8	0.2	-8.5	5.8	-0.2
Marino Rocks	December 16	2	21	Yes	1:36pm	25	0	Lower	Nerita atramentosa	Wet	32	Centre	Depression	36.3	Edge	East	29.7	Flat	Centre	32	6.6	4.3	-2.3	0	-4.3	2.3	0
Marino Rocks	December 16	2	22	Yes	1:37pm	25	0	Lower	Nerita atramentosa	Wet	27.2	Centre	Flat	35	Edge	East	26.4	Flat	Centre	29.4	8.6	7.8	-0.8	2.2	-7.8	0.8	-2.2
Marino Rocks	December 16	2	23	Yes	1:39pm	25	0	Lower	Nerita atramentosa	Wet	33.5	East	Edge	39.7	Edge	West	29.2	Flat	East	33.5	10.5	6.2	-4.3	0	-6.2	4.3	0
Marino Rocks	December 16	2	24	Yes	1:40pm	25	0	Lower	Nerita atramentosa	Dry	32.8	Centre	Flat	43.4	Edge	Centre	28.8	Flat	East	35.2	14.6	10.6	-4	2.4	-10.6	4	-2.4
Marino Rocks	December 16	2	25	Yes	1:43pm	25	0	Lower	Nerita atramentosa	Dry	37.3	East	Edge	42	Edge	West	28.8	Flat	East	36.9	13.2	4.7	-8.5	-0.4	-4.7	8.5	0.4
Marino Rocks	December 16	2	26	Yes	1:44pm	25	0	Lower	Nerita atramentosa	Dry	34.3	Centre	Flat	41.8	Edge	West	30.9	Flat	West	36	10.9	7.5	-3.4	1.7	-7.5	3.4	-1.7
Marino Rocks	December 16	2	27	Yes	1:46pm	25	0	Lower	Nerita atramentosa	Wet	32.2	East	Edge	37.9	Edge	West	28.8	Flat	East	32.4	9.1	5.7	-3.4	0.2	-5.7	3.4	-0.2
Marino Rocks	December 16	2	28	Yes	1:50pm	25	0	Lower	Nerita atramentosa	Dry	35	Centre	Flat	41.6	Edge	East	33.6	Edge	East	36.6	8	6.6	-1.4	1.6	-6.6	1.4	-1.6
Marino Rocks	December 16	2	29	Yes	1:51pm	25	0	Lower	Nerita atramentosa	Wet	31.4	Centre	Flat	40.9	Edge	West	30.5	Flat	East	35.1	10.4	9.5	-0.9	3.7	-9.5	0.9	-3.7
Marino Rocks	December 16	2	30	Yes	1:53pm	25	0	Lower	Nerita atramentosa	Wet	35.6	Centre	Edge	39.8	Edge	Centre	28.4	Edge	East	33.8	11.4	4.2	-7.2	-1.8	-4.2	7.2	1.8
Marino Rocks	December 16	2	31	Yes	1:55pm	25	0	Lower	Nerita atramentosa	Wet	35.3	Centre	Flat	42.8	Edge	West	29	Edge	East	36	13.8	7.5	-6.3	0.7	-7.5	6.3	-0.7
Marino Rocks	December 16	2	32	Yes	1:56pm	25	0	Lower	Nerita atramentosa	Dry	34.3	East	Edge	42.4	Edge	West	29.8	Edge	East	36.8	12.6	8.1	-4.5	2.5	-8.1	4.5	-2.5
Marino Rocks	December 16	2	2	No	12:43pm	24	0	Lower	Diloma concamerata	Wet	31.6	East	Edge	38.3	Edge	West	28.3	Edge	East	33.8	10	6.7	-3.3	2.2	-6.7	3.3	-2.2
Marino Rocks	December 16	2	4	No	12:48pm	24	0	Lower	Diloma concamerata	Wet	27.5	Centre	Edge	36	Edge	East	25.6	Flat	Centre	30.8	10.4	8.5	-1.9	3.3	-8.5	1.9	-3.3
Marino Rocks	December 16	2	10	No	1:04pm	24	0	Lower	Diloma concamerata	Wet	32.7	Centre	Flat	40.2	Edge	West	30.2	Flat	Centre	34.7	10	7.5	-2.5	2	-7.5	2.5	-2
Marino Rocks	December 16	2	14	No	1:12pm	24	0	Lower	Diloma concamerata	Wet	32	West	Edge	37.1	Edge	Centre	25	Flat	Centre	29.9	12.1	5.1	-7	-2.1	-5.1	7	2.1
Marino Rocks	December 16	2	19	No	1:21pm	24	0	Lower	Diloma concamerata	Wet	29.9	Centre	Flat	40	Edge	West	25.2	Edge	East	31	14.8	10.1	-4.7	1.1	-10.1	4.7	-1.1
Marino Rocks	December 16	2	20	No	1:22pm	24	0	Lower	Diloma concamerata	Dry	29.4	Centre	Edge	40.3	Edge	West	26	Flat	Centre	32	14.3	10.9	-3.4	2.6	-10.9	3.4	-2.6
Marino Rocks	December 16	2	22	No	1:37pm	24	0	Lower	Diloma concamerata	Wet	27.4	East	Flat	35	Edge	East	26.4	Flat	Centre	29.4	8.6	7.6	-1	2	-7.6	1	-2
Marino Rocks	December 16	2	23	No	1:39pm	25	0	Lower	Diloma concamerata	Wet	29.2	East	Flat	39.7	Edge	West	29.2	Flat	East	33.5	10.5	10.5	0	4.3	-10.5	0	-4.3
Marino Rocks	December 16	2	27	No	1:46pm	25	0	Lower	Diloma concamerata	Wet	29.2	East	Flat	37.9	Edge	West	28.8	Flat	East	32.4	9.1	8.7	-0.4	3.2	-8.7	0.4	-3.2
Marino Rocks	December 16	2	31	No	1:55pm	25	0	Lower	Diloma concamerata	Wet	32.8	East	Flat	42.8	Edge	West	29	Edge	East	36	13.8	10	-3.8	3.2	-10	3.8	-3.2
Marino Rocks	December 16	2	33	Yes	1:58pm	25	0	Lower	Diloma concamerata	Wet	29.3	East	Edge	37.1	Edge	Centre	25.7	Flat	East	31.2	11.4	7.8	-3.6	1.9	-7.8	3.6	-1.9
Marino Rocks	December 16	2	34	Yes	2:01pm	25	0	Lower	Diloma concamerata	Wet	30.1	West	Flat	35.9	Edge	West	22.7	Edge	West	31.6	13.2	5.8	-7.4	1.5	-5.8	7.4	-1.5
Marino Rocks	December 16	2	35	Yes	2:03pm	25	0	Lower	Diloma concamerata	Wet	31.3	West	Flat	36.5	Edge	West	30.1	Flat	Centre	33	6.4	5.2	-1.2	1.7	-5.2	1.2	-1.7
Marino Rocks	December 16	2	36	Yes	2:05pm	25	0	Lower	Diloma concamerata	Wet	35.8	East	Flat	39.8	Edge	West	32.6	Flat	Centre	35.5	7.2	4	-3.2	-0.3	-4	3.2	0.3
Marino Rocks	December 16	2	37	Yes	2:06pm	25	0	Lower	Diloma concamerata	Wet	32.7	Centre	Flat	37.8	Edge	West	31.9	Flat	Centre	34.3	5.9	5.1	-0.8	1.6	-5.1	0.8	-1.6
Marino Rocks	December 16	2	38	Yes	2:07pm	25	0	Lower	Diloma concamerata	Wet	31.9	Centre	Flat	39.6	Edge	West	27	Edge	East	32.5	12.6	7.7	-4.9	0.6	-7.7	4.9	-0.6
Marino Rocks	December 16	2	39	Yes	2:10pm	25	0	Lower	Diloma concamerata	Wet	27.9	West	Edge	34.6	Edge	East	26.6	Flat	Centre	30	8	6.7	-1.3	2.1	-6.7	1.3	-2.1
Marino Rocks	December 16	2	40	Yes	2:12pm	25	0	Lower	Diloma concamerata	Wet	28.9	Centre	Flat	36.3	Edge	West	28.1	Flat	Centre	31.3	8.2	7.4	-0.8	2.4	-7.4	0.8	-2.4
Marino Rocks	December 16	2	41	Yes	2:15pm	25	0	Lower	Diloma concamerata	Wet	30.1	East	Flat	33.7	Edge	West	27.6	Flat	Centre	30.3	6.1	3.6	-2.5	0.2	-3.6	2.5	-0.2
Marino Rocks	December 16	2	43	Yes	2:34pm	25	0	Upper	Diloma concamerata	Dry	29.7	Centre	Edge	38.2	Edge	West	27.8	Flat	Centre	32.9	10.4	8.5	-1.9	3.2	-8.5	1.9	-3.2
Marino Rocks	December 16	2	53	Yes	3:07pm	26	0	Upper	Diloma concamerata	Dry	42.7	West	Depression	46.9	Edge	West	35.9	Flat	East	39.6	11	4.2	-6.8	-3.1	-4.2	6.8	3.1
Marino Rocks	December 16	2	62	Yes	3:31pm	26	0	Upper	Diloma concamerata	Wet	32.6	East	Edge	42.4	Edge	West	30.6	Edge	East	34.7	11.8	9.8	-2	2.1	-9.8	2	-2.1
Marino Rocks	December 16	2	6	Yes	12:55pm	24	0	Lower	Bembicium nanum	Dry	36.7	East	Edge	41.3	Edge	Centre	33.6	Flat	Centre	37.2	7.7	4.6	-3.1	0.5	-4.6	3.1	-0.5
Marino Rocks	December 16	2	8	Yes	1:01pm	24	0	Lower	Bembicium nanum	Dry	36.1	Centre	Edge	38.5	Edge	Centre	33.1	Flat	Centre	35.2	5.4	2.4	-3	-0.9	-2.4	3	0.9
Marino Rocks	December 16	2	24	No	1:40pm	25	0	Lower	Bembicium nanum	Dry	38.4	East	Edge	43.4	Edge	Centre	28.8	Flat	Centre	35.2	14.6	5	-9.6	-3.2	-5	9.6	3.2
Marino Rocks	December 16	2	42	Yes	2:29pm	25	0	Upper	Bembicium nanum	Dry	37.5	Centre	Flat	42.8	Flat	Centre	34.6	Flat	Centre	38.3	8.2	5.3	-2.9	0.8	-5.3	2.9	-0.8
Marino Rocks	December 16	2	44	Yes	2:35pm	26	0	Upper	Bembicium nanum	Dry	41.7	Centre	Flat	47.8	Edge	West	41.2	Flat	Centre	43.3	6.6	6.1	-0.5	1.6	-6.1	0.5	-1.6
Marino Rocks	December 16	2	45	Yes	2:37pm	26	0	Upper	Bembicium nanum	Dry	38.3	West	Flat	45	Edge	East	35.4	Flat	West	39	9.6	6.7	-2.9	0.7	-6.7	2.9	-0.7
Marino Rocks	December 16	2	46	Yes	2:39pm	26	0	Upper	Bembicium nanum	Dry	41.9	East	Flat	47.7	Edge	West	39.7	Edge	East	42.8	8	5.8	-2.2	0.9	-5.8	2.2	-0.9
Marino Rocks	December 16	2	47	Yes	2:46pm	26	0	Upper	Bembicium nanum	Dry	38	Centre	Flat	41.7	Edge	East	32.8	Flat	Centre	38.5	8.9	3.7	-5.2	0.5	-3.7	5.2	-0.5
Marino Rocks	December 16	2	48	Yes	2:47pm	26	0	Upper	Bembicium nanum	Dry	38	East	Flat	42.4	Edge	West	33.2	Flat	Centre	38.4	9.2	4.4	-4.8	0.4	-4.4	4.8	-0.4
Marino Rocks	December 16	2	49	Yes	2:48pm	26	0	Upper	Bembicium nanum	Dry	39.4	East	Flat	44.1	Edge	Centre	36.2	Edge	East	40.5	7.9	4.7	-3.2	1.1	-4.7	3.2	-1.1
Marino Rocks	December 16	2	50	Yes	2:50pm	26	0	Upper	Bembicium nanum	Dry	34.6	Centre	Flat	45	Edge	Centre	33.3	Flat	Centre	37.9	11.7	10.4	-1.3	3.3	-10.4	1.3	-3.3
Marino Rocks	December 16	2	51	Yes	3:01pm	26	0	Upper	Bembicium nanum	Dry	34.5	East	Edge	44.8	Edge	West	32.5	Edge	Centre	39	12.3	10.3	-2	4.5	-10.3	2	-4.5
Marino Rocks	December 16	2	52	Yes	3:05pm	26	0	Upper	Bembicium nanum	Dry	41.1	Centre	Flat	45.8	Depression	Centre	39.2	Flat	Centre	41.6	6.6	4.7	-1.9	0.5	-4.7	1.9	-0.5
Marino Rocks	December 16	2	53	No	3:07pm	26	0	Upper	Bembicium nanum	Dry	41.6	West	Edge	46.9	Edge	West	36	Flat	East	39.6	10.9	5.3	-5.6	-2	-5.3	5.6	2
Marino Rocks	December 16	2	54	Yes	3:11pm	26	0	Upper	Bembicium nanum	Dry	41.3	East	Drop	44.8	Edge	East	35.9	Flat	Centre	39.1	8.9	3.5	-5.4	-2.2	-3.5	5.4	2.2
Marino Rocks	December 16	2	55	Yes	3:13pm	26	0	Upper	Bembicium nanum	Dry	35.9	West	Edge	42.9	Flat	Centre	35.9	Edge	West	40.2	7	7	0	4.3	-7	0	-4.3
Marino Rocks	December 16	2	56	Yes	3:15pm	26	0	Upper	Bembicium nanum	Dry	39.7	East	Flat	44.4	Edge	Centre	35.4	Flat	Centre	39.5	9	4.7	-4.3	-0.2	-4.7	4.3	0.2
Marino Rocks	December 16	2	57	Yes	3:19pm	26	0	Upper	Bembicium nanum	Dry	41.9	East	Edge	47.2	Edge	West	40.9	Edge	East	43	6.3	5.3	-1	1.1	-5.3	1	-1.1
Marino Rocks	December 16	2	58	Yes	3:25pm	26	0	Upper	Bembicium nanum	Dry	42.6	East	Flat	45.3	Edge	West	36.4	Flat	East	40.6	8.9	2.7	-6.2	-2	-2.7	6.2	2
Marino Rocks	December 16	2	59	Yes	3:26pm	26	0	Upper	Bembicium nanum	Dry	36.4	West	Edge	40.9	Edge	West	32.3	Flat	Centre	35.8	8.6	4.5	-4.1	-0.6	-4.5	4.1	0.6
Marino Rocks	December 16	2	60	Yes	3:28pm	26	0	Upper	Bembicium nanum	Dry	42.9	East	Flat	45.8	Edge	West	38	Edge	East	42.1	7.8	2.9	-4.9	-0.8	-2.9	4.9	0.8
Marino Rocks	December 16	2	61	Yes	3:30pm	26	0	Upper	Bembicium nanum	Dry	41	East	Edge	43.3	Edge	East	38.5	Flat	Centre	39.9	4.8	2.3	-2.5	-1.1	-2.3	2.5	1.1
Marino Rocks	December 16	2	63	Yes	3:34pm	26	0	Upper	Bembicium nanum	Dry	41.3	Centre	Edge	50.2	Edge	West	40.3	Edge	East	45.4	9.9	8.9	-1	4.1	-8.9	1	-4.1
Marino Rocks	December 16	2	64	Yes	3:35pm	26	0	Upper	Bembicium nanum	Dry	41.5	West	Depression	44.5	Edge	West	36.9	Edge	East	40.9	7.6	3	-4.6	-0.6	-3	4.6	0.6
Marino Rocks	December 16	2	65	Yes	3:37pm	26	0	Upper	Bembicium nanum	Dry	41.2	Centre	Flat	45.5	Edge	West	36.2	Edge	East	40.3	9.3	4.3	-5	-0.9	-4.3	5	0.9
Marino Rocks	December 16	2	66	Yes	3:37pm	26	0	Upper	Bembicium nanum	Dry	45	East	Edge	48.4	Edge	West	40.3	Flat	East	44.3	8.1	3.4	-4.7	-0.7	-3.4	4.7	0.7
Marino Rocks	December 16	2	67	Yes	3:38pm	26	0	Upper	Bembicium nanum	Dry	43.7	Centre	Flat	45.5	Edge	West	39.8	Edge	West	43.5	5.7	1.8	-3.9	-0.2	-1.8	3.9	0.2
Marino Rocks	December 16	2	69	Yes	3:40pm	26	0	Upper	Bembicium nanum	Dry	44.8	West	Edge	47.8	Edge	West	35.5	Flat	Centre	42.5	12.3	3	-9.3	-2.3	-3	9.3	2.3
Marino Rocks	December 16	2	70	Yes	3:42pm	26	0	Upper	Bembicium nanum	Dry	37.5	East	Drop	43.3	Edge	West	31.4	Flat	Centre	37.1	11.9	5.8	-6.1	-0.4	-5.8	6.1	0.4
Marino Rocks	December 16	2	71	Yes	3:45pm	26	0	Upper	Bembicium nanum	Dry	43.3	Centre	Flat	47.4	Edge	East	41.6	Flat	Centre	43.6	5.8	4.1	-1.7	0.3	-4.1	1.7	-0.3
OSullivan Beach	December 18	1	11	Yes	2:24pm	25	0	Lower	Nerita atramentosa	Dry	30.7	Centre	Flat	36.3	Edge	Centre	24.1	Flat	Centre	30.8	12.2	5.6	-6.6	0.1	-5.6	6.6	-0.1
OSullivan Beach	December 18	1	14	Yes	2:28pm	25	0	Lower	Nerita atramentosa	Wet	29.4	Centre	Flat	34.8	Edge	West	27.6	Flat	Centre	31	7.2	5.4	-1.8	1.6	-5.4	1.8	-1.6
OSullivan Beach	December 18	1	16	Yes	2:37pm	25	0	Lower	Nerita atramentosa	Dry	28	Centre	Flat	33.5	Edge	Centre	27.7	Flat	Centre	30.1	5.8	5.5	-0.3	2.1	-5.5	0.3	-2.1
OSullivan Beach	December 18	1	17	Yes	2:38pm	25	0	Lower	Nerita atramentosa	Dry	31.7	Centre	Flat	34.9	Edge	West	26.2	Flat	Centre	30.9	8.7	3.2	-5.5	-0.8	-3.2	5.5	0.8
OSullivan Beach	December 18	1	18	Yes	2:39pm	25	0	Lower	Nerita atramentosa	Dry	27	Centre	Flat	34.9	Edge	West	23.6	Edge	East	28.3	11.3	7.9	-3.4	1.3	-7.9	3.4	-1.3
OSullivan Beach	December 18	1	19	Yes	2:41pm	25	0	Lower	Nerita atramentosa	Dry	27.7	East	Flat	36.3	Edge	West	24.7	Depression	East	30.3	11.6	8.6	-3	2.6	-8.6	3	-2.6
OSullivan Beach	December 18	1	22	Yes	2:45pm	25	0	Lower	Nerita atramentosa	Dry	33.9	Centre	Flat	37.1	Edge	West	29.1	Flat	Centre	32	8	3.2	-4.8	-1.9	-3.2	4.8	1.9
OSullivan Beach	December 18	1	23	Yes	2:46pm	25	0	Lower	Nerita atramentosa	Wet	28.7	Centre	Flat	35.3	Edge	West	24.8	Flat	Centre	29.8	10.5	6.6	-3.9	1.1	-6.6	3.9	-1.1
OSullivan Beach	December 18	1	24	Yes	2:47pm	25	0	Lower	Nerita atramentosa	Wet	32.3	Centre	Flat	37.2	Edge	West	22.8	Flat	Centre	31.1	14.4	4.9	-9.5	-1.2	-4.9	9.5	1.2
OSullivan Beach	December 18	1	26	Yes	2:50pm	25	0	Lower	Nerita atramentosa	Wet	29.3	Centre	Edge	36.8	Edge	West	23.7	Flat	Centre	31.4	13.1	7.5	-5.6	2.1	-7.5	5.6	-2.1
OSullivan Beach	December 18	1	27	Yes	2:52pm	25	0	Lower	Nerita atramentosa	Wet	28	East	Flat	34.3	Edge	West	24.6	Depression	Centre	28.3	9.7	6.3	-3.4	0.3	-6.3	3.4	-0.3
OSullivan Beach	December 18	1	29	Yes	2:56pm	25	0	Lower	Nerita atramentosa	Wet	26	Centre	Drop	33.4	Edge	East	18.5	Flat	Centre	26	14.9	7.4	-7.5	0	-7.4	7.5	0
OSullivan Beach	December 18	1	30	Yes	2:58pm	25	0	Lower	Nerita atramentosa	Wet	28.8	Centre	Edge	34	Edge	West	24.5	Flat	Centre	28.2	9.5	5.2	-4.3	-0.6	-5.2	4.3	0.6
OSullivan Beach	December 18	1	32	Yes	3:01pm	25	0	Lower	Nerita atramentosa	Dry	29.4	Centre	Flat	33.6	Edge	West	26.7	Flat	Centre	29.7	6.9	4.2	-2.7	0.3	-4.2	2.7	-0.3
OSullivan Beach	December 18	1	33	Yes	3:02pm	25	0	Lower	Nerita atramentosa	Dry	26.8	Centre	Edge	34.6	Depression	Centre	24.9	Depression	East	29.8	9.7	7.8	-1.9	3	-7.8	1.9	-3
OSullivan Beach	December 18	1	34	Yes	3:03pm	25	0	Lower	Nerita atramentosa	Wet	29.2	East	Edge	30.6	Edge	East	23.9	Edge	West	27.1	6.7	1.4	-5.3	-2.1	-1.4	5.3	2.1
OSullivan Beach	December 18	1	36	Yes	3:13pm	25	0	Lower	Nerita atramentosa	Dry	31.4	West	Flat	35.7	Edge	West	24.9	Flat	East	30.5	10.8	4.3	-6.5	-0.9	-4.3	6.5	0.9
OSullivan Beach	December 18	1	37	Yes	3:14pm	25	0	Lower	Nerita atramentosa	Dry	31	East	Flat	39.1	Edge	West	26.7	Flat	East	32.5	12.4	8.1	-4.3	1.5	-8.1	4.3	-1.5
OSullivan Beach	December 18	1	38	Yes	3:15pm	25	0	Lower	Nerita atramentosa	Dry	31.9	East	Depression	38.7	Depression	West	25.5	Flat	East	31.6	13.2	6.8	-6.4	-0.3	-6.8	6.4	0.3
OSullivan Beach	December 18	1	39	Yes	3:17pm	25	0	Lower	Nerita atramentosa	Dry	30.2	Centre	Flat	37.2	Edge	West	25.6	Flat	Centre	30.8	11.6	7	-4.6	0.6	-7	4.6	-0.6
OSullivan Beach	December 18	1	40	Yes	3:18pm	25	0	Lower	Nerita atramentosa	Dry	27.5	Centre	Flat	37.9	Peak	West	24.6	Flat	Centre	31.1	13.3	10.4	-2.9	3.6	-10.4	2.9	-3.6
OSullivan Beach	December 18	1	41	Yes	3:19pm	25	0	Lower	Nerita atramentosa	Wet	26.8	West	Flat	31.9	Edge	West	20.1	Flat	East	26.9	11.8	5.1	-6.7	0.1	-5.1	6.7	-0.1
OSullivan Beach	December 18	1	42	Yes	3:21pm	25	0	Lower	Nerita atramentosa	Dry	29.3	West	Edge	31.1	Edge	East	22.4	Flat	Centre	27.7	8.7	1.8	-6.9	-1.6	-1.8	6.9	1.6
OSullivan Beach	December 18	1	43	Yes	3:23pm	25	0	Lower	Nerita atramentosa	Dry	23.3	East	Edge	28.9	Edge	Centre	22.5	Flat	East	25.1	6.4	5.6	-0.8	1.8	-5.6	0.8	-1.8
OSullivan Beach	December 18	1	44	Yes	3:24pm	25	0	Lower	Nerita atramentosa	Wet	29.6	West	Flat	33.3	Edge	West	24.1	Flat	East	29.2	9.2	3.7	-5.5	-0.4	-3.7	5.5	0.4
OSullivan Beach	December 18	1	45	Yes	3:25pm	25	0	Lower	Nerita atramentosa	Wet	27.9	West	Edge	32.5	Edge	West	21.1	Flat	East	27.1	11.4	4.6	-6.8	-0.8	-4.6	6.8	0.8
OSullivan Beach	December 18	1	46	Yes	3:27pm	25	0	Lower	Nerita atramentosa	Wet	28.9	West	Flat	31.6	Edge	West	22.1	Peak	Centre	27.6	9.5	2.7	-6.8	-1.3	-2.7	6.8	1.3
OSullivan Beach	December 18	1	47	Yes	3:28pm	25	0	Lower	Nerita atramentosa	Dry	25.9	West	Flat	31.3	Edge	East	21.9	Flat	Centre	26.6	9.4	5.4	-4	0.7	-5.4	4	-0.7
OSullivan Beach	December 18	1	48	Yes	3:29pm	25	0	Lower	Nerita atramentosa	Wet	30.6	Centre	Flat	33.9	Peak	East	26.7	Flat	Centre	29.9	7.2	3.3	-3.9	-0.7	-3.3	3.9	0.7
OSullivan Beach	December 18	1	49	Yes	3:31pm	25	0	Lower	Nerita atramentosa	Dry	28.2	East	Flat	32	Flat	Centre	22.3	Flat	Centre	28.1	9.7	3.8	-5.9	-0.1	-3.8	5.9	0.1
OSullivan Beach	December 18	1	14	No	2:28pm	25	0	Lower	Diloma concamerata	Wet	29.9	Centre	Flat	34.8	Edge	West	27.6	Flat	Centre	31	7.2	4.9	-2.3	1.1	-4.9	2.3	-1.1
OSullivan Beach	December 18	1	16	No	2:37pm	25	0	Lower	Diloma concamerata	Dry	29.2	Centre	Flat	33.5	Edge	Centre	27.7	Flat	Centre	30.1	5.8	4.3	-1.5	0.9	-4.3	1.5	-0.9
OSullivan Beach	December 18	1	18	No	2:39pm	25	0	Lower	Diloma concamerata	Dry	28.4	Centre	Flat	34.9	Edge	West	23.6	Edge	East	28.3	11.3	6.5	-4.8	-0.1	-6.5	4.8	0.1
OSullivan Beach	December 18	1	20	Yes	2:42pm	25	0	Lower	Diloma concamerata	Dry	29.5	Centre	Flat	37.2	Edge	East	25.2	Peak	East	29.8	12	7.7	-4.3	0.3	-7.7	4.3	-0.3
OSullivan Beach	December 18	1	21	Yes	2:44pm	25	0	Lower	Diloma concamerata	Wet	30.3	Centre	Edge	35.6	Edge	East	26.3	Flat	Centre	29.6	9.3	5.3	-4	-0.7	-5.3	4	0.7
OSullivan Beach	December 18	1	23	No	2:46pm	25	0	Lower	Diloma concamerata	Dry	28.3	Centre	Flat	35.3	Edge	West	24.8	Flat	Centre	29.8	10.5	7	-3.5	1.5	-7	3.5	-1.5
OSullivan Beach	December 18	1	24	No	2:47pm	25	0	Lower	Diloma concamerata	Wet	28.9	East	Edge	37.2	Edge	West	22.8	Flat	Centre	31.1	14.4	8.3	-6.1	2.2	-8.3	6.1	-2.2
OSullivan Beach	December 18	1	25	Yes	2:49pm	25	0	Lower	Diloma concamerata	Wet	29.4	West	Edge	31.9	Edge	West	25.3	Flat	Centre	27.8	6.6	2.5	-4.1	-1.6	-2.5	4.1	1.6
OSullivan Beach	December 18	1	26	No	2:50pm	25	0	Lower	Diloma concamerata	Wet	29.6	Centre	Flat	36.8	Edge	West	23.7	Flat	Centre	31.4	13.1	7.2	-5.9	1.8	-7.2	5.9	-1.8
OSullivan Beach	December 18	1	27	No	2:52pm	25	0	Lower	Diloma concamerata	Wet	27.1	East	Flat	34.3	Edge	West	24.6	Depression	Centre	28.3	9.7	7.2	-2.5	1.2	-7.2	2.5	-1.2
OSullivan Beach	December 18	1	28	Yes	2:54pm	25	0	Lower	Diloma concamerata	Wet	30.8	West	Flat	35.8	Edge	West	25.9	Edge	East	30.9	9.9	5	-4.9	0.1	-5	4.9	-0.1
OSullivan Beach	December 18	1	29	No	2:56pm	25	0	Lower	Diloma concamerata	Dry	25.6	Centre	Flat	33.4	Edge	East	18.5	Flat	Centre	26	14.9	7.8	-7.1	0.4	-7.8	7.1	-0.4
OSullivan Beach	December 18	1	30	No	2:58pm	25	0	Lower	Diloma concamerata	Wet	28.3	Centre	Flat	34	Edge	West	24.5	Flat	Centre	28.2	9.5	5.7	-3.8	-0.1	-5.7	3.8	0.1
OSullivan Beach	December 18	1	34	No	3:03pm	25	0	Lower	Diloma concamerata	Wet	27.1	West	Flat	30.6	Edge	East	23.9	Edge	West	27.1	6.7	3.5	-3.2	0	-3.5	3.2	0
OSullivan Beach	December 18	1	38	No	3:15pm	25	0	Lower	Diloma concamerata	Dry	33.5	West	Drop	38.7	Depression	West	25.5	Flat	East	31.6	13.2	5.2	-8	-1.9	-5.2	8	1.9
OSullivan Beach	December 18	1	41	No	3:19pm	25	0	Lower	Diloma concamerata	Wet	25.9	West	Peak	31.9	Edge	West	20.1	Flat	East	26.9	11.8	6	-5.8	1	-6	5.8	-1
OSullivan Beach	December 18	1	42	No	3:21pm	25	0	Lower	Diloma concamerata	Dry	27.8	West	Flat	31.1	Edge	East	22.4	Flat	Centre	27.7	8.7	3.3	-5.4	-0.1	-3.3	5.4	0.1
OSullivan Beach	December 18	1	44	No	3:24pm	25	0	Lower	Diloma concamerata	Wet	28.6	Centre	Flat	33.3	Edge	West	24.1	Flat	East	29.2	9.2	4.7	-4.5	0.6	-4.7	4.5	-0.6
OSullivan Beach	December 18	1	45	No	3:25pm	25	0	Lower	Diloma concamerata	Wet	27.5	Centre	Flat	32.5	Edge	West	21.1	Flat	East	27.1	11.4	5	-6.4	-0.4	-5	6.4	0.4
OSullivan Beach	December 18	1	46	No	3:27pm	25	0	Lower	Diloma concamerata	Dry	25.2	Centre	Drop	31.6	Edge	West	22.1	Peak	Centre	27.6	9.5	6.4	-3.1	2.4	-6.4	3.1	-2.4
OSullivan Beach	December 18	1	47	No	3:28pm	25	0	Lower	Diloma concamerata	Dry	27.4	West	Edge	31.3	Edge	East	21.9	Flat	Centre	26.6	9.4	3.9	-5.5	-0.8	-3.9	5.5	0.8
OSullivan Beach	December 18	1	48	No	3:29pm	25	0	Lower	Diloma concamerata	Wet	31.7	West	Flat	33.9	Peak	East	26.7	Flat	Centre	29.9	7.2	2.2	-5	-1.8	-2.2	5	1.8
OSullivan Beach	December 18	1	50	Yes	3:32pm	25	0	Lower	Diloma concamerata	Dry	32	East	Flat	35.9	Edge	West	25.8	Flat	Centre	30.4	10.1	3.9	-6.2	-1.6	-3.9	6.2	1.6
OSullivan Beach	December 18	1	51	Yes	3:34pm	25	0	Lower	Diloma concamerata	Dry	26.1	East	Flat	32.1	Edge	West	23.2	Flat	East	27.3	8.9	6	-2.9	1.2	-6	2.9	-1.2
OSullivan Beach	December 18	1	52	Yes	3:35pm	25	0	Lower	Diloma concamerata	Dry	30.8	Centre	Flat	34.2	Edge	West	22.1	Flat	Centre	29.8	12.1	3.4	-8.7	-1	-3.4	8.7	1
OSullivan Beach	December 18	1	53	Yes	3:37pm	25	0	Lower	Diloma concamerata	Wet	26	East	Edge	30.8	Edge	West	23.3	Flat	Centre	27.4	7.5	4.8	-2.7	1.4	-4.8	2.7	-1.4
OSullivan Beach	December 18	1	54	Yes	3:40pm	25	0	Lower	Diloma concamerata	Dry	28.3	Centre	Flat	30.4	Edge	East	22.2	Flat	Centre	27.1	8.2	2.1	-6.1	-1.2	-2.1	6.1	1.2
OSullivan Beach	December 18	1	55	Yes	3:41pm	25	0	Lower	Diloma concamerata	Dry	27.3	West	Flat	31.6	Edge	East	24	Flat	West	28.1	7.6	4.3	-3.3	0.8	-4.3	3.3	-0.8
OSullivan Beach	December 18	1	56	Yes	3:42pm	25	0	Lower	Diloma concamerata	Dry	27.5	Centre	Flat	31.7	Edge	Centre	25	Flat	Centre	29	6.7	4.2	-2.5	1.5	-4.2	2.5	-1.5
OSullivan Beach	December 18	1	57	Yes	3:44pm	25	0	Lower	Diloma concamerata	Dry	26.6	Centre	Flat	32.2	Edge	East	23.3	Flat	East	27.3	8.9	5.6	-3.3	0.7	-5.6	3.3	-0.7
OSullivan Beach	December 18	1	1	Yes	2:04pm	25	0	Lower	Bembicium nanum	Dry	33.9	Centre	Edge	37.8	Edge	West	27.1	Edge	East	32.9	10.7	3.9	-6.8	-1	-3.9	6.8	1
OSullivan Beach	December 18	1	2	Yes	2:06pm	25	0	Lower	Bembicium nanum	Dry	37	Centre	Drop	38.8	Edge	Centre	27.6	Flat	Centre	33.8	11.2	1.8	-9.4	-3.2	-1.8	9.4	3.2
OSullivan Beach	December 18	1	3	Yes	2:07pm	25	0	Lower	Bembicium nanum	Dry	32.1	East	Edge	36.3	Edge	West	28.7	Flat	East	31.9	7.6	4.2	-3.4	-0.2	-4.2	3.4	0.2
OSullivan Beach	December 18	1	4	Yes	2:09pm	25	0	Lower	Bembicium nanum	Dry	36.7	Centre	Depression	40.6	Edge	West	32.3	Flat	Centre	36.2	8.3	3.9	-4.4	-0.5	-3.9	4.4	0.5
OSullivan Beach	December 18	1	5	Yes	2:11pm	25	0	Lower	Bembicium nanum	Dry	31.8	Centre	Flat	39.2	Edge	East	29.4	Depression	Centre	33.6	9.8	7.4	-2.4	1.8	-7.4	2.4	-1.8
OSullivan Beach	December 18	1	6	Yes	2:15pm	25	0	Lower	Bembicium nanum	Dry	31.7	East	Flat	35.4	Depression	Centre	27	Flat	Centre	30.3	8.4	3.7	-4.7	-1.4	-3.7	4.7	1.4
OSullivan Beach	December 18	1	7	Yes	2:16pm	25	0	Lower	Bembicium nanum	Dry	32.3	West	Depression	40.3	Edge	West	24.5	Depression	Centre	29.7	15.8	8	-7.8	-2.6	-8	7.8	2.6
OSullivan Beach	December 18	1	9	Yes	2:21pm	25	0	Lower	Bembicium nanum	Dry	33.7	East	Edge	37.6	Edge	Centre	29.5	Flat	Centre	33.1	8.1	3.9	-4.2	-0.6	-3.9	4.2	0.6
OSullivan Beach	December 18	1	10	Yes	2:23pm	25	0	Lower	Bembicium nanum	Wet	30.4	Centre	Drop	35.1	Edge	West	27.8	Edge	East	31.6	7.3	4.7	-2.6	1.2	-4.7	2.6	-1.2
OSullivan Beach	December 18	1	13	Yes	2:26pm	25	0	Lower	Bembicium nanum	Dry	33.2	Centre	Peak	37.8	Edge	East	28.9	Flat	Centre	32.1	8.9	4.6	-4.3	-1.1	-4.6	4.3	1.1
OSullivan Beach	December 18	1	15	Yes	2:30pm	25	0	Lower	Bembicium nanum	Dry	29.2	Centre	Edge	37.1	Edge	West	25.8	Flat	East	29.7	11.3	7.9	-3.4	0.5	-7.9	3.4	-0.5
OSullivan Beach	December 18	1	20	No	2:42pm	25	0	Lower	Bembicium nanum	Dry	33.6	Centre	Edge	37.2	Edge	East	25.2	Peak	East	29.8	12	3.6	-8.4	-3.8	-3.6	8.4	3.8
OSullivan Beach	December 18	1	31	Yes	3:00pm	25	0	Lower	Bembicium nanum	Dry	32.6	Centre	Flat	35.5	Peak	Centre	24.6	Flat	East	29.7	10.9	2.9	-8	-2.9	-2.9	8	2.9
OSullivan Beach	December 18	1	35	Yes	3:05pm	25	0	Lower	Bembicium nanum	Dry	31.3	West	Edge	38.2	Depression	Centre	27.4	Peak	East	32.4	10.8	6.9	-3.9	1.1	-6.9	3.9	-1.1
OSullivan Beach	December 18	1	37	No	3:14pm	25	0	Lower	Bembicium nanum	Dry	33.6	East	Edge	39.1	Edge	West	26.7	Flat	East	32.5	12.4	5.5	-6.9	-1.1	-5.5	6.9	1.1
OSullivan Beach	December 18	1	38	No	3:15pm	25	0	Lower	Bembicium nanum	Dry	29.5	East	Edge	38.7	Depression	West	25.5	Flat	East	31.6	13.2	9.2	-4	2.1	-9.2	4	-2.1
OSullivan Beach	December 18	1	53	No	3:37pm	25	0	Lower	Bembicium nanum	Wet	28.2	West	Depression	30.8	Edge	West	23.3	Flat	Centre	27.4	7.5	2.6	-4.9	-0.8	-2.6	4.9	0.8
OSullivan Beach	December 18	1	58	Yes	3:57pm	24	0	Upper	Bembicium nanum	Dry	35.2	East	Edge	37.1	Depression	East	27.4	Flat	West	32.6	9.7	1.9	-7.8	-2.6	-1.9	7.8	2.6
OSullivan Beach	December 18	1	59	Yes	3:59pm	24	0	Upper	Bembicium nanum	Dry	31.8	East	Flat	35.8	Flat	Centre	26.6	Flat	Centre	32.2	9.2	4	-5.2	0.4	-4	5.2	-0.4
OSullivan Beach	December 18	1	60	Yes	4:00pm	24	0	Upper	Bembicium nanum	Dry	27.9	East	Peak	33.2	Flat	East	23	Flat	Centre	26.8	10.2	5.3	-4.9	-1.1	-5.3	4.9	1.1
OSullivan Beach	December 18	1	61	Yes	4:02pm	24	0	Upper	Bembicium nanum	Dry	34.9	Centre	Flat	36.5	Depression	Centre	28.5	Flat	East	32.8	8	1.6	-6.4	-2.1	-1.6	6.4	2.1
OSullivan Beach	December 18	1	62	Yes	4:04pm	24	0	Upper	Bembicium nanum	Dry	31.7	Centre	Flat	38.2	Edge	West	27.2	Flat	Centre	31.7	11	6.5	-4.5	0	-6.5	4.5	0
OSullivan Beach	December 18	1	63	Yes	4:06pm	24	0	Upper	Bembicium nanum	Dry	28	Centre	Flat	32	Edge	West	24.4	Flat	Centre	27.3	7.6	4	-3.6	-0.7	-4	3.6	0.7
OSullivan Beach	December 18	1	64	Yes	4:07pm	24	0	Upper	Bembicium nanum	Dry	28.5	Centre	Flat	35	Peak	Centre	25.8	Flat	Centre	29.7	9.2	6.5	-2.7	1.2	-6.5	2.7	-1.2
OSullivan Beach	December 18	1	65	Yes	4:10pm	24	0	Upper	Bembicium nanum	Dry	28.7	East	Flat	37.3	Depression	West	25.9	Flat	East	30.9	11.4	8.6	-2.8	2.2	-8.6	2.8	-2.2
OSullivan Beach	December 18	1	66	Yes	4:11pm	24	0	Upper	Bembicium nanum	Wet	29.5	West	Edge	33.1	Depression	Centre	24	Flat	West	29.5	9.1	3.6	-5.5	0	-3.6	5.5	0
OSullivan Beach	December 18	1	67	Yes	4:13pm	24	0	Upper	Bembicium nanum	Dry	35.9	West	Edge	37.8	Edge	West	30.4	Flat	Centre	33.3	7.4	1.9	-5.5	-2.6	-1.9	5.5	2.6
OSullivan Beach	December 18	1	68	Yes	4:15pm	24	0	Upper	Bembicium nanum	Dry	30.3	West	Depression	33.4	Depression	Centre	22.7	Flat	East	28.4	10.7	3.1	-7.6	-1.9	-3.1	7.6	1.9
OSullivan Beach	December 18	1	69	Yes	4:18pm	24	0	Upper	Bembicium nanum	Dry	29.4	East	Flat	34.8	Flat	Centre	27.9	Flat	Centre	31.3	6.9	5.4	-1.5	1.9	-5.4	1.5	-1.9
OSullivan Beach	December 18	1	70	Yes	4:19pm	24	0	Upper	Bembicium nanum	Dry	30.7	East	Flat	33.1	Edge	West	26	Flat	West	29.5	7.1	2.4	-4.7	-1.2	-2.4	4.7	1.2
Marino Rocks	December 20	1	1	Yes	2:10pm	23	0	Lower	Nerita atramentosa	Wet	24.9	Centre	Flat	34.9	Edge	West	21.9	Edge	East	27.6	13	10	-3	2.7	-10	3	-2.7
Marino Rocks	December 20	1	2	Yes	2:13pm	23	0	Lower	Nerita atramentosa	Wet	21.3	East	Flat	30.2	Edge	West	20.1	Flat	Centre	24.5	10.1	8.9	-1.2	3.2	-8.9	1.2	-3.2
Marino Rocks	December 20	1	3	Yes	2:15pm	23	0	Lower	Nerita atramentosa	Dry	27.2	Centre	Flat	33.2	Edge	East	26.4	Flat	Centre	29.1	6.8	6	-0.8	1.9	-6	0.8	-1.9
Marino Rocks	December 20	1	4	Yes	2:16pm	23	0	Lower	Nerita atramentosa	Dry	25.6	Centre	Flat	31	Edge	West	21.8	Flat	Centre	26.8	9.2	5.4	-3.8	1.2	-5.4	3.8	-1.2
Marino Rocks	December 20	1	5	Yes	2:17pm	23	0	Lower	Nerita atramentosa	Wet	29.8	Centre	Edge	33.8	Edge	West	27.7	Flat	Centre	30.2	6.1	4	-2.1	0.4	-4	2.1	-0.4
Marino Rocks	December 20	1	6	Yes	2:19pm	23	0	Lower	Nerita atramentosa	Wet	25.3	Centre	Flat	31.6	Edge	West	23.5	Depression	Centre	27.3	8.1	6.3	-1.8	2	-6.3	1.8	-2
Marino Rocks	December 20	1	7	Yes	2:23pm	23	0	Lower	Nerita atramentosa	Dry	25.3	Centre	Flat	30.2	Edge	West	24.8	Flat	Centre	27	5.4	4.9	-0.5	1.7	-4.9	0.5	-1.7
Marino Rocks	December 20	1	8	Yes	2:24pm	23	0	Lower	Nerita atramentosa	Wet	27.8	Centre	Edge	30.9	Edge	West	25	Edge	East	27.5	5.9	3.1	-2.8	-0.3	-3.1	2.8	0.3
Marino Rocks	December 20	1	9	Yes	2:25pm	23	0	Lower	Nerita atramentosa	Dry	29.4	West	Flat	33.8	Edge	West	26.1	Flat	Centre	29.2	7.7	4.4	-3.3	-0.2	-4.4	3.3	0.2
Marino Rocks	December 20	1	10	Yes	2:27pm	23	0	Lower	Nerita atramentosa	Wet	25.8	Centre	Edge	30.1	Edge	East	24.8	Flat	Centre	26.8	5.3	4.3	-1	1	-4.3	1	-1
Marino Rocks	December 20	1	11	Yes	2:27pm	23	0	Lower	Nerita atramentosa	Dry	29.8	Centre	Flat	34.4	Edge	West	25.2	Flat	East	28.8	9.2	4.6	-4.6	-1	-4.6	4.6	1
Marino Rocks	December 20	1	12	Yes	2:28pm	23	0	Lower	Nerita atramentosa	Wet	31.2	Centre	Flat	38.8	Edge	West	27.3	Edge	East	31.3	11.5	7.6	-3.9	0.1	-7.6	3.9	-0.1
Marino Rocks	December 20	1	13	Yes	2:30pm	23	0	Lower	Nerita atramentosa	Wet	33.3	Centre	Flat	35.7	Flat	East	29.2	Flat	Centre	32.6	6.5	2.4	-4.1	-0.7	-2.4	4.1	0.7
Marino Rocks	December 20	1	14	Yes	2:31pm	23	0	Lower	Nerita atramentosa	Wet	29.4	West	Flat	31.9	Edge	West	26.6	Edge	East	29.7	5.3	2.5	-2.8	0.3	-2.5	2.8	-0.3
Marino Rocks	December 20	1	15	Yes	2:32pm	23	0	Lower	Nerita atramentosa	Dry	29.6	Centre	Flat	33.7	Edge	West	28	Flat	East	30.6	5.7	4.1	-1.6	1	-4.1	1.6	-1
Marino Rocks	December 20	1	16	Yes	2:33pm	23	0	Lower	Nerita atramentosa	Dry	28.8	Centre	Flat	32.6	Edge	East	26.8	Flat	Centre	29.6	5.8	3.8	-2	0.8	-3.8	2	-0.8
Marino Rocks	December 20	1	18	Yes	2:36pm	23	0	Lower	Nerita atramentosa	Wet	27.4	West	Flat	32.7	Edge	West	26.1	Edge	East	28.8	6.6	5.3	-1.3	1.4	-5.3	1.3	-1.4
Marino Rocks	December 20	1	20	Yes	2:39pm	23	0	Lower	Nerita atramentosa	Wet	27.9	East	Flat	30.8	Edge	West	25.5	Flat	East	27.8	5.3	2.9	-2.4	-0.1	-2.9	2.4	0.1
Marino Rocks	December 20	1	21	Yes	2:40pm	23	0	Lower	Nerita atramentosa	Wet	28.7	Centre	Edge	36.1	Edge	East	28	Edge	West	30.9	8.1	7.4	-0.7	2.2	-7.4	0.7	-2.2
Marino Rocks	December 20	1	22	Yes	2:41pm	23	0	Lower	Nerita atramentosa	Wet	29.2	Centre	Flat	39.6	Edge	West	25.9	Flat	East	31.7	13.7	10.4	-3.3	2.5	-10.4	3.3	-2.5
Marino Rocks	December 20	1	23	Yes	2:42pm	23	0	Lower	Nerita atramentosa	Wet	29	Centre	Flat	33.3	Edge	Centre	25.1	Edge	West	29.2	8.2	4.3	-3.9	0.2	-4.3	3.9	-0.2
Marino Rocks	December 20	1	24	Yes	2:43pm	23	0	Lower	Nerita atramentosa	Dry	27.7	Centre	Flat	33.8	Edge	Centre	23.3	Edge	East	28.4	10.5	6.1	-4.4	0.7	-6.1	4.4	-0.7
Marino Rocks	December 20	1	25	Yes	2:44pm	23	0	Lower	Nerita atramentosa	Dry	31.1	Centre	Flat	35.9	Edge	Centre	29	Edge	East	31.8	6.9	4.8	-2.1	0.7	-4.8	2.1	-0.7
Marino Rocks	December 20	1	26	Yes	2:45pm	23	0	Lower	Nerita atramentosa	Dry	27.5	Centre	Flat	33.3	Edge	Centre	26.7	Flat	Centre	28.7	6.6	5.8	-0.8	1.2	-5.8	0.8	-1.2
Marino Rocks	December 20	1	27	Yes	2:46pm	23	0	Lower	Nerita atramentosa	Wet	28.1	Centre	Flat	33.9	Edge	West	25.9	Peak	Centre	28.9	8	5.8	-2.2	0.8	-5.8	2.2	-0.8
Marino Rocks	December 20	1	28	Yes	2:47pm	23	0	Lower	Nerita atramentosa	Dry	26.8	Centre	Depression	31.4	Edge	Centre	22.8	Flat	Centre	27	8.6	4.6	-4	0.2	-4.6	4	-0.2
Marino Rocks	December 20	1	29	Yes	2:48pm	23	0	Lower	Nerita atramentosa	Dry	27.5	Centre	Flat	36.8	Edge	Centre	26.8	Edge	Centre	30.7	10	9.3	-0.7	3.2	-9.3	0.7	-3.2
Marino Rocks	December 20	1	30	Yes	2:49pm	23	0	Lower	Nerita atramentosa	Wet	27	Centre	Edge	32.2	Edge	West	25	Flat	Centre	28.6	7.2	5.2	-2	1.6	-5.2	2	-1.6
Marino Rocks	December 20	1	31	Yes	2:50pm	23	0	Lower	Nerita atramentosa	Dry	27.7	Centre	Flat	34.4	Edge	West	26.6	Flat	Centre	29.2	7.8	6.7	-1.1	1.5	-6.7	1.1	-1.5
Marino Rocks	December 20	1	35	Yes	2:56pm	23	0	Lower	Nerita atramentosa	Dry	28.8	East	Flat	35.3	Edge	West	26.6	Edge	East	30.5	8.7	6.5	-2.2	1.7	-6.5	2.2	-1.7
Marino Rocks	December 20	1	1	No	2:10pm	23	0	Lower	Diloma concamerata	Wet	23.3	East	Edge	34.9	Edge	West	21.9	Edge	East	27.6	13	11.6	-1.4	4.3	-11.6	1.4	-4.3
Marino Rocks	December 20	1	6	No	2:19pm	23	0	Lower	Diloma concamerata	Wet	25.2	East	Flat	32.4	Edge	East	23.5	Depression	Centre	27.3	8.9	7.2	-1.7	2.1	-7.2	1.7	-2.1
Marino Rocks	December 20	1	12	No	2:28pm	23	0	Lower	Diloma concamerata	Wet	30.2	Centre	Flat	38.8	Edge	West	27.3	Edge	East	31.3	11.5	8.6	-2.9	1.1	-8.6	2.9	-1.1
Marino Rocks	December 20	1	14	No	2:31pm	23	0	Lower	Diloma concamerata	Wet	27.9	Centre	Flat	31.9	Edge	West	26.7	Edge	East	29.7	5.2	4	-1.2	1.8	-4	1.2	-1.8
Marino Rocks	December 20	1	17	Yes	2:35pm	23	0	Lower	Diloma concamerata	Wet	28.3	Centre	Flat	31.2	Edge	Centre	23.9	Flat	West	27.7	7.3	2.9	-4.4	-0.6	-2.9	4.4	0.6
Marino Rocks	December 20	1	22	No	2:41pm	23	0	Lower	Diloma concamerata	Wet	28	East	Flat	39.6	Edge	West	25.9	Flat	East	31.7	13.7	11.6	-2.1	3.7	-11.6	2.1	-3.7
Marino Rocks	December 20	1	23	No	2:42pm	23	0	Lower	Diloma concamerata	Wet	29.5	West	Flat	33.3	Edge	Centre	25.1	Edge	West	29.2	8.2	3.8	-4.4	-0.3	-3.8	4.4	0.3
Marino Rocks	December 20	1	30	No	2:49pm	23	0	Lower	Diloma concamerata	Wet	27.7	Centre	Depression	32.2	Edge	West	24.8	Flat	Centre	28.6	7.4	4.5	-2.9	0.9	-4.5	2.9	-0.9
Marino Rocks	December 20	1	33	Yes	2:53pm	23	0	Lower	Diloma concamerata	Dry	26.8	Centre	Flat	31.8	Edge	Centre	25.2	Edge	East	28.6	6.6	5	-1.6	1.8	-5	1.6	-1.8
Marino Rocks	December 20	1	34	Yes	2:54pm	23	0	Lower	Diloma concamerata	Wet	26.7	Centre	Edge	33.4	Edge	West	25.5	Edge	East	28.3	7.9	6.7	-1.2	1.6	-6.7	1.2	-1.6
Marino Rocks	December 20	1	38	Yes	3:09pm	23	0	Lower	Diloma concamerata	Wet	27.3	East	Flat	37.6	Edge	West	25.4	Flat	East	31	12.2	10.3	-1.9	3.7	-10.3	1.9	-3.7
Marino Rocks	December 20	1	39	Yes	3:10pm	23	0	Lower	Diloma concamerata	Wet	25.8	East	Edge	33.9	Edge	West	24.3	Flat	East	29.4	9.6	8.1	-1.5	3.6	-8.1	1.5	-3.6
Marino Rocks	December 20	1	40	Yes	3:11pm	23	0	Lower	Diloma concamerata	Wet	26.2	Centre	Flat	30.6	Flat	Centre	23.4	Flat	West	26.2	7.2	4.4	-2.8	0	-4.4	2.8	0
Marino Rocks	December 20	1	41	Yes	3:13pm	23	0	Lower	Diloma concamerata	Wet	31	Centre	Edge	32.4	Edge	Centre	27	Flat	East	30	5.4	1.4	-4	-1	-1.4	4	1
Marino Rocks	December 20	1	45	Yes	3:20pm	23	0	Lower	Diloma concamerata	Wet	31.2	Centre	Flat	38.3	Edge	Centre	28.9	Flat	Centre	33.9	9.4	7.1	-2.3	2.7	-7.1	2.3	-2.7
Marino Rocks	December 20	1	46	Yes	3:21pm	23	0	Lower	Diloma concamerata	Dry	30.4	Centre	Flat	33.5	Edge	West	25.9	Flat	Centre	29.6	7.6	3.1	-4.5	-0.8	-3.1	4.5	0.8
Marino Rocks	December 20	1	47	Yes	3:24pm	23	0	Lower	Diloma concamerata	Dry	32.4	Centre	Flat	35.4	Edge	Centre	27.3	Flat	Centre	30.2	8.1	3	-5.1	-2.2	-3	5.1	2.2
Marino Rocks	December 20	1	49	Yes	3:31pm	23	0	Lower	Diloma concamerata	Dry	30.4	West	Flat	33.6	Flat	East	25.3	Flat	West	29.7	8.3	3.2	-5.1	-0.7	-3.2	5.1	0.7
Marino Rocks	December 20	1	50	Yes	3:33pm	23	0	Lower	Diloma concamerata	Wet	29.8	Centre	Flat	34.5	Flat	Centre	25.1	Flat	Centre	29.2	9.4	4.7	-4.7	-0.6	-4.7	4.7	0.6
Marino Rocks	December 20	1	51	Yes	3:34pm	23	0	Lower	Diloma concamerata	Wet	30.3	Centre	Flat	33.5	Edge	West	25.6	Flat	East	28.6	7.9	3.2	-4.7	-1.7	-3.2	4.7	1.7
Marino Rocks	December 20	1	52	Yes	3:36pm	23	0	Lower	Diloma concamerata	Wet	28.4	Centre	Flat	32.3	Edge	Centre	25.9	Flat	Centre	28.5	6.4	3.9	-2.5	0.1	-3.9	2.5	-0.1
Marino Rocks	December 20	1	53	Yes	3:38pm	23	0	Lower	Diloma concamerata	Dry	29.3	Centre	Flat	34.9	Edge	West	26.3	Flat	East	29.2	8.6	5.6	-3	-0.1	-5.6	3	0.1
Marino Rocks	December 20	1	54	Yes	3:41pm	23	0	Lower	Diloma concamerata	Wet	27.8	Centre	Flat	32.9	Edge	West	25.7	Flat	Centre	28.4	7.2	5.1	-2.1	0.6	-5.1	2.1	-0.6
Marino Rocks	December 20	1	55	Yes	3:42pm	23	0	Lower	Diloma concamerata	Dry	31	Centre	Flat	34.9	Edge	Centre	28.1	Edge	Centre	31.6	6.8	3.9	-2.9	0.6	-3.9	2.9	-0.6
Marino Rocks	December 20	1	56	Yes	3:43pm	23	0	Lower	Diloma concamerata	Wet	28.8	West	Edge	34.3	Edge	West	26.5	Edge	Centre	29.4	7.8	5.5	-2.3	0.6	-5.5	2.3	-0.6
Marino Rocks	December 20	1	57	Yes	3:45pm	23	0	Lower	Diloma concamerata	Dry	32.4	Centre	Flat	36.7	Edge	West	30.3	Flat	East	32.8	6.4	4.3	-2.1	0.4	-4.3	2.1	-0.4
Marino Rocks	December 20	1	58	Yes	3:46pm	23	0	Lower	Diloma concamerata	Dry	33.3	Centre	Flat	36.2	Edge	West	31	Flat	East	33	5.2	2.9	-2.3	-0.3	-2.9	2.3	0.3
Marino Rocks	December 20	1	59	Yes	3:48pm	23	0	Lower	Diloma concamerata	Wet	26.4	Centre	Flat	34.1	Edge	West	24.9	Flat	Centre	27.9	9.2	7.7	-1.5	1.5	-7.7	1.5	-1.5
Marino Rocks	December 20	1	60	Yes	3:48pm	23	0	Lower	Diloma concamerata	Wet	27.1	Centre	Depression	36.5	Edge	West	24.7	Edge	West	29.8	11.8	9.4	-2.4	2.7	-9.4	2.4	-2.7
Marino Rocks	December 20	1	61	Yes	3:50pm	23	0	Lower	Diloma concamerata	Dry	24.7	Centre	Flat	30.2	Edge	West	23	Flat	East	26	7.2	5.5	-1.7	1.3	-5.5	1.7	-1.3
Marino Rocks	December 20	1	6	No	2:19pm	23	0	Lower	Bembicium nanum	Wet	28.9	West	Flat	32.4	Edge	West	23.5	Depression	Centre	27.3	8.9	3.5	-5.4	-1.6	-3.5	5.4	1.6
Marino Rocks	December 20	1	19	Yes	2:37pm	23	0	Lower	Bembicium nanum	Dry	33.1	East	Edge	35.3	Edge	East	29.9	Flat	West	32.1	5.4	2.2	-3.2	-1	-2.2	3.2	1
Marino Rocks	December 20	1	32	Yes	2:52pm	23	0	Lower	Bembicium nanum	Dry	31.7	West	Edge	34.2	Edge	West	28.8	Flat	Centre	31	5.4	2.5	-2.9	-0.7	-2.5	2.9	0.7
Marino Rocks	December 20	1	36	Yes	2:57pm	23	0	Lower	Bembicium nanum	Dry	31.4	East	Edge	37.8	Edge	Centre	30.5	Flat	East	33.4	7.3	6.4	-0.9	2	-6.4	0.9	-2
Marino Rocks	December 20	1	37	Yes	2:58pm	23	0	Lower	Bembicium nanum	Dry	37.5	Centre	Depression	40.5	Edge	West	31.8	Flat	East	34.6	8.7	3	-5.7	-2.9	-3	5.7	2.9
Marino Rocks	December 20	1	42	Yes	3:15pm	23	0	Lower	Bembicium nanum	Dry	33.5	East	Edge	39.5	Depression	Centre	28.5	Flat	East	33.3	11	6	-5	-0.2	-6	5	0.2
Marino Rocks	December 20	1	43	Yes	3:16pm	23	0	Lower	Bembicium nanum	Wet	34.1	Centre	Edge	36.3	Edge	Centre	26.6	Flat	Centre	30.3	9.7	2.2	-7.5	-3.8	-2.2	7.5	3.8
Marino Rocks	December 20	1	44	Yes	3:18pm	23	0	Lower	Bembicium nanum	Dry	37.7	West	Edge	39.5	Edge	West	28.3	Flat	East	32.3	11.2	1.8	-9.4	-5.4	-1.8	9.4	5.4
Marino Rocks	December 20	1	48	Yes	3:26pm	23	0	Lower	Bembicium nanum	Dry	33.3	Centre	Flat	40.2	Edge	Centre	30.5	Flat	Centre	33.4	9.7	6.9	-2.8	0.1	-6.9	2.8	-0.1
Marino Rocks	December 20	1	52	No	3:36pm	23	0	Lower	Bembicium nanum	Wet	30.4	East	Edge	32.3	Edge	East	25.9	Flat	Centre	28.5	6.4	1.9	-4.5	-1.9	-1.9	4.5	1.9
Marino Rocks	December 20	1	53	No	3:38pm	23	0	Lower	Bembicium nanum	Dry	27.9	Centre	Depression	34.9	Edge	West	26.4	Flat	East	29.2	8.5	7	-1.5	1.3	-7	1.5	-1.3
Marino Rocks	December 20	1	62	Yes	4:05pm	23	0	Upper	Bembicium nanum	Dry	32.7	East	Flat	37.8	Edge	West	31	Edge	East	34.1	6.8	5.1	-1.7	1.4	-5.1	1.7	-1.4
Marino Rocks	December 20	1	63	Yes	4:07pm	23	0	Upper	Bembicium nanum	Dry	33.9	Centre	Depression	39.5	Edge	Centre	31.8	Flat	East	34.3	7.7	5.6	-2.1	0.4	-5.6	2.1	-0.4
Marino Rocks	December 20	1	64	Yes	4:09pm	23	0	Upper	Bembicium nanum	Dry	31.6	Centre	Flat	35.8	Edge	West	29.8	Flat	Centre	31.7	6	4.2	-1.8	0.1	-4.2	1.8	-0.1
Marino Rocks	December 20	1	65	Yes	4:11pm	23	0	Upper	Bembicium nanum	Dry	34.1	West	Flat	38	Edge	West	30.2	Flat	East	33.3	7.8	3.9	-3.9	-0.8	-3.9	3.9	0.8
Marino Rocks	December 20	1	66	Yes	4:13pm	23	0	Upper	Bembicium nanum	Dry	29.8	Centre	Flat	33.7	Flat	West	26.7	Depression	East	30.3	7	3.9	-3.1	0.5	-3.9	3.1	-0.5
Marino Rocks	December 20	1	67	Yes	4:17pm	23	0	Upper	Bembicium nanum	Dry	31	Centre	Flat	35.9	Flat	Centre	28.4	Edge	West	32.2	7.5	4.9	-2.6	1.2	-4.9	2.6	-1.2
Marino Rocks	December 20	1	68	Yes	4:20pm	23	0	Upper	Bembicium nanum	Dry	34.1	Centre	Flat	36.9	Flat	Centre	31.8	Flat	Centre	34.1	5.1	2.8	-2.3	0	-2.8	2.3	0
Marino Rocks	December 20	1	69	Yes	4:21pm	23	0	Upper	Bembicium nanum	Dry	35.7	East	Flat	38.5	Edge	West	31.6	Flat	Centre	34.9	6.9	2.8	-4.1	-0.8	-2.8	4.1	0.8
Marino Rocks	December 20	1	70	Yes	4:22pm	23	0	Upper	Bembicium nanum	Dry	30.8	Centre	Flat	34.4	Edge	Centre	30	Flat	Centre	31.9	4.4	3.6	-0.8	1.1	-3.6	0.8	-1.1
Marino Rocks	December 20	1	71	Yes	4:24pm	23	0	Upper	Bembicium nanum	Dry	34.9	Centre	Flat	38.4	Edge	West	28.3	Edge	East	34.3	10.1	3.5	-6.6	-0.6	-3.5	6.6	0.6
Marino Rocks	December 20	1	72	Yes	4:25pm	23	0	Upper	Bembicium nanum	Dry	33.5	Centre	Flat	35.9	Flat	Centre	31.6	Flat	East	33.6	4.3	2.4	-1.9	0.1	-2.4	1.9	-0.1
Marino Rocks	December 20	1	73	Yes	4:26pm	23	0	Upper	Bembicium nanum	Dry	31.8	Centre	Flat	36.8	Edge	West	29.2	Depression	West	32.6	7.6	5	-2.6	0.8	-5	2.6	-0.8
Marino Rocks	December 20	1	74	Yes	4:27pm	23	0	Upper	Bembicium nanum	Dry	34	East	Peak	39.5	Flat	Centre	33.4	Peak	East	35.9	6.1	5.5	-0.6	1.9	-5.5	0.6	-1.9
Marino Rocks	December 20	1	75	Yes	4:28pm	23	0	Upper	Bembicium nanum	Dry	34.7	West	Edge	36.7	Edge	West	32.3	Flat	East	34	4.4	2	-2.4	-0.7	-2	2.4	0.7
Marino Rocks	December 20	1	76	Yes	4:29pm	23	0	Upper	Bembicium nanum	Dry	33.9	West	Edge	37.9	Edge	West	31.6	Flat	Centre	34.4	6.3	4	-2.3	0.5	-4	2.3	-0.5
Marino Rocks	December 20	1	77	Yes	4:31pm	23	0	Upper	Bembicium nanum	Dry	31	Centre	Depression	35.2	Depression	Centre	28.7	Edge	East	32.3	6.5	4.2	-2.3	1.3	-4.2	2.3	-1.3
Marino Rocks	December 20	1	78	Yes	4:32pm	23	0	Upper	Bembicium nanum	Dry	30.1	Centre	Flat	35.5	Edge	West	29.2	Peak	Centre	31.9	6.3	5.4	-0.9	1.8	-5.4	0.9	-1.8
Marino Rocks	December 20	1	79	Yes	4:33pm	23	0	Upper	Bembicium nanum	Dry	30.9	Centre	Flat	38	Edge	West	29.8	Flat	East	32.8	8.2	7.1	-1.1	1.9	-7.1	1.1	-1.9
Marino Rocks	December 20	1	80	Yes	4:34pm	23	0	Upper	Bembicium nanum	Dry	35	West	Flat	38.3	Edge	West	30.8	Flat	East	33.8	7.5	3.3	-4.2	-1.2	-3.3	4.2	1.2
OSullivan Beach	December 21	2	1	Yes	3:03pm	25	0	Lower	Nerita atramentosa	Dry	26.6	East	Edge	30.7	Edge	West	24.4	Flat	Centre	26.8	6.3	4.1	-2.2	0.2	-4.1	2.2	-0.2
OSullivan Beach	December 21	2	2	Yes	3:05pm	25	0	Lower	Nerita atramentosa	Wet	23.3	West	Edge	27.7	Depression	West	19.2	Flat	Centre	23.2	8.5	4.4	-4.1	-0.1	-4.4	4.1	0.1
OSullivan Beach	December 21	2	4	Yes	3:08pm	25	0	Lower	Nerita atramentosa	Dry	22.1	East	Flat	28.8	Edge	West	19.2	Depression	East	24	9.6	6.7	-2.9	1.9	-6.7	2.9	-1.9
OSullivan Beach	December 21	2	5	Yes	3:09pm	25	0	Lower	Nerita atramentosa	Wet	23.3	Centre	Flat	29.2	Depression	West	21.1	Flat	Centre	24.4	8.1	5.9	-2.2	1.1	-5.9	2.2	-1.1
OSullivan Beach	December 21	2	6	Yes	3:10pm	25	0	Lower	Nerita atramentosa	Wet	24.4	West	Flat	27.9	Flat	East	18.9	Flat	Centre	23.2	9	3.5	-5.5	-1.2	-3.5	5.5	1.2
OSullivan Beach	December 21	2	7	Yes	3:12pm	25	0	Lower	Nerita atramentosa	Dry	26.4	Centre	Depression	30.1	Edge	West	21.9	Flat	East	26.2	8.2	3.7	-4.5	-0.2	-3.7	4.5	0.2
OSullivan Beach	December 21	2	9	Yes	3:15pm	25	0	Lower	Nerita atramentosa	Dry	22.3	Centre	Flat	27.8	Edge	West	19.6	Depression	East	24	8.2	5.5	-2.7	1.7	-5.5	2.7	-1.7
OSullivan Beach	December 21	2	10	Yes	3:16pm	25	0	Lower	Nerita atramentosa	Wet	21.9	Centre	Flat	27.6	Edge	West	20.7	Drop	Centre	24.5	6.9	5.7	-1.2	2.6	-5.7	1.2	-2.6
OSullivan Beach	December 21	2	11	Yes	3:18pm	25	0	Lower	Nerita atramentosa	Wet	29.7	Centre	Depression	34.1	Edge	West	24.3	Flat	East	28	9.8	4.4	-5.4	-1.7	-4.4	5.4	1.7
OSullivan Beach	December 21	2	12	Yes	3:21pm	25	0	Lower	Nerita atramentosa	Dry	25.6	Centre	Edge	31.2	Edge	East	22.6	Depression	West	26.7	8.6	5.6	-3	1.1	-5.6	3	-1.1
OSullivan Beach	December 21	2	14	Yes	3:23pm	25	0	Lower	Nerita atramentosa	Wet	26.7	Centre	Depression	31	Edge	West	22.6	Flat	Centre	26.7	8.4	4.3	-4.1	0	-4.3	4.1	0
OSullivan Beach	December 21	2	15	Yes	3:25pm	25	0	Lower	Nerita atramentosa	Dry	30.2	Centre	Depression	33.2	Edge	West	24	Flat	Centre	27.9	9.2	3	-6.2	-2.3	-3	6.2	2.3
OSullivan Beach	December 21	2	16	Yes	3:27pm	25	0	Lower	Nerita atramentosa	Wet	27.8	West	Depression	31.2	Edge	East	24.3	Depression	Centre	27.2	6.9	3.4	-3.5	-0.6	-3.4	3.5	0.6
OSullivan Beach	December 21	2	17	Yes	3:28pm	25	0	Lower	Nerita atramentosa	Dry	26.8	Centre	Flat	30.8	Edge	West	23.7	Flat	East	26.8	7.1	4	-3.1	0	-4	3.1	0
OSullivan Beach	December 21	2	18	Yes	3:29pm	25	0	Lower	Nerita atramentosa	Wet	25.9	Centre	Flat	33.2	Edge	West	24.6	Edge	East	28.2	8.6	7.3	-1.3	2.3	-7.3	1.3	-2.3
OSullivan Beach	December 21	2	20	Yes	3:32pm	25	0	Lower	Nerita atramentosa	Dry	27.1	Centre	Flat	30.9	Edge	West	20.3	Peak	East	26.2	10.6	3.8	-6.8	-0.9	-3.8	6.8	0.9
OSullivan Beach	December 21	2	21	Yes	3:33pm	25	0	Lower	Nerita atramentosa	Dry	26.2	East	Edge	29.8	Edge	Centre	21.5	Flat	Centre	25.7	8.3	3.6	-4.7	-0.5	-3.6	4.7	0.5
OSullivan Beach	December 21	2	22	Yes	3:35pm	25	0	Lower	Nerita atramentosa	Dry	27	West	Flat	30.4	Edge	West	22.6	Depression	East	26.4	7.8	3.4	-4.4	-0.6	-3.4	4.4	0.6
OSullivan Beach	December 21	2	23	Yes	3:36pm	25	0	Lower	Nerita atramentosa	Dry	30.9	Centre	Flat	33	Edge	West	27.5	Flat	East	30.1	5.5	2.1	-3.4	-0.8	-2.1	3.4	0.8
OSullivan Beach	December 21	2	25	Yes	3:38pm	25	0	Lower	Nerita atramentosa	Dry	29.1	West	Flat	31.9	Flat	West	26	Flat	Centre	28.6	5.9	2.8	-3.1	-0.5	-2.8	3.1	0.5
OSullivan Beach	December 21	2	26	Yes	3:39pm	25	0	Lower	Nerita atramentosa	Dry	28	Centre	Depression	35.7	Edge	West	23.4	Depression	Centre	29.2	12.3	7.7	-4.6	1.2	-7.7	4.6	-1.2
OSullivan Beach	December 21	2	28	Yes	3:41pm	25	0	Lower	Nerita atramentosa	Dry	28.5	East	Flat	32.5	Edge	West	24.1	Depression	East	29.5	8.4	4	-4.4	1	-4	4.4	-1
OSullivan Beach	December 21	2	29	Yes	3:43pm	25	0	Lower	Nerita atramentosa	Wet	28.8	Centre	Flat	32.8	Edge	West	25.6	Peak	East	29	7.2	4	-3.2	0.2	-4	3.2	-0.2
OSullivan Beach	December 21	2	30	Yes	3:44pm	25	0	Lower	Nerita atramentosa	Dry	25.6	Centre	Flat	33.9	Edge	West	21.5	Edge	East	28.3	12.4	8.3	-4.1	2.7	-8.3	4.1	-2.7
OSullivan Beach	December 21	2	31	Yes	3:46pm	25	0	Lower	Nerita atramentosa	Dry	23.3	Centre	Flat	30.2	Edge	East	22.2	Flat	Centre	26.3	8	6.9	-1.1	3	-6.9	1.1	-3
OSullivan Beach	December 21	2	32	Yes	3:47pm	25	0	Lower	Nerita atramentosa	Dry	28.3	West	Edge	36.3	Depression	Centre	26.8	Flat	West	30.8	9.5	8	-1.5	2.5	-8	1.5	-2.5
OSullivan Beach	December 21	2	33	Yes	3:48pm	25	0	Lower	Nerita atramentosa	Dry	27.6	Centre	Flat	32.5	Edge	West	25.8	Flat	East	28.2	6.7	4.9	-1.8	0.6	-4.9	1.8	-0.6
OSullivan Beach	December 21	2	34	Yes	3:49pm	25	0	Lower	Nerita atramentosa	Dry	26.1	Centre	Edge	32.5	Flat	Centre	22.7	Flat	Centre	27.3	9.8	6.4	-3.4	1.2	-6.4	3.4	-1.2
OSullivan Beach	December 21	2	35	Yes	3:50pm	25	0	Lower	Nerita atramentosa	Dry	29.4	West	Edge	35.4	Edge	West	24.5	Flat	Centre	29.8	10.9	6	-4.9	0.4	-6	4.9	-0.4
OSullivan Beach	December 21	2	36	Yes	3:51pm	25	0	Lower	Nerita atramentosa	Wet	29.4	Centre	Flat	34.8	Edge	West	24	Flat	East	29.3	10.8	5.4	-5.4	-0.1	-5.4	5.4	0.1
OSullivan Beach	December 21	2	1	No	3:03pm	25	0	Lower	Diloma concamerata	Dry	26.5	Centre	Flat	30.7	Edge	West	24.4	Flat	Centre	26.8	6.3	4.2	-2.1	0.3	-4.2	2.1	-0.3
OSullivan Beach	December 21	2	2	No	3:05pm	25	0	Lower	Diloma concamerata	Wet	22.9	West	Edge	27.7	Edge	West	19.2	Flat	Centre	23.2	8.5	4.8	-3.7	0.3	-4.8	3.7	-0.3
OSullivan Beach	December 21	2	3	No	3:06pm	25	0	Lower	Diloma concamerata	Dry	21.8	Centre	Flat	29	Edge	Centre	20.3	Flat	Centre	24.5	8.7	7.2	-1.5	2.7	-7.2	1.5	-2.7
OSullivan Beach	December 21	2	4	No	3:08pm	25	0	Lower	Diloma concamerata	Dry	25	Centre	Flat	28.8	Edge	West	19.2	Depression	East	24	9.6	3.8	-5.8	-1	-3.8	5.8	1
OSullivan Beach	December 21	2	5	No	3:09pm	25	0	Lower	Diloma concamerata	Wet	24.4	West	Edge	29.2	Edge	West	21.1	Flat	Centre	24.4	8.1	4.8	-3.3	0	-4.8	3.3	0
OSullivan Beach	December 21	2	6	No	3:10pm	25	0	Lower	Diloma concamerata	Wet	24.2	West	Flat	27.9	Flat	East	18.9	Flat	Centre	23.2	9	3.7	-5.3	-1	-3.7	5.3	1
OSullivan Beach	December 21	2	7	No	3:12pm	25	0	Lower	Diloma concamerata	Wet	25.5	Centre	Flat	30.7	Edge	West	21.9	Flat	East	26.2	8.8	5.2	-3.6	0.7	-5.2	3.6	-0.7
OSullivan Beach	December 21	2	9	No	3:15pm	25	0	Lower	Diloma concamerata	Wet	21.6	East	Flat	27.5	Edge	West	19.6	Flat	East	24	7.9	5.9	-2	2.4	-5.9	2	-2.4
OSullivan Beach	December 21	2	10	No	3:16pm	25	0	Lower	Diloma concamerata	Wet	24.7	Centre	Depression	29.5	Edge	West	20.7	Peak	Centre	24.5	8.8	4.8	-4	-0.2	-4.8	4	0.2
OSullivan Beach	December 21	2	11	No	3:18pm	25	0	Lower	Diloma concamerata	Wet	26.1	Centre	Edge	34.1	Edge	West	24.3	Flat	East	28	9.8	8	-1.8	1.9	-8	1.8	-1.9
OSullivan Beach	December 21	2	13	Yes	3:22pm	25	0	Lower	Diloma concamerata	Dry	24.2	West	Flat	31	Edge	East	21.4	Flat	Centre	26.2	9.6	6.8	-2.8	2	-6.8	2.8	-2
OSullivan Beach	December 21	2	16	No	3:27pm	25	0	Lower	Diloma concamerata	Wet	26.9	East	Drop	31.2	Edge	Centre	24.3	Depression	Centre	27.2	6.9	4.3	-2.6	0.3	-4.3	2.6	-0.3
OSullivan Beach	December 21	2	17	No	3:28pm	25	0	Lower	Diloma concamerata	Dry	27.8	West	Edge	30.8	Depression	West	23.7	Flat	East	26.8	7.1	3	-4.1	-1	-3	4.1	1
OSullivan Beach	December 21	2	18	No	3:29pm	25	0	Lower	Diloma concamerata	Wet	29.1	West	Edge	33.2	Edge	West	24.6	Edge	East	28.2	8.6	4.1	-4.5	-0.9	-4.1	4.5	0.9
OSullivan Beach	December 21	2	19	Yes	3:31pm	25	0	Lower	Diloma concamerata	Dry	26.6	East	Depression	31.4	Edge	West	23.5	Edge	Centre	26.8	7.9	4.8	-3.1	0.2	-4.8	3.1	-0.2
OSullivan Beach	December 21	2	20	No	3:32pm	25	0	Lower	Diloma concamerata	Dry	26.5	Centre	Flat	30.9	Edge	West	20.3	Flat	East	26.2	10.6	4.4	-6.2	-0.3	-4.4	6.2	0.3
OSullivan Beach	December 21	2	22	No	3:35pm	25	0	Lower	Diloma concamerata	Wet	25.9	Centre	Flat	30.4	Edge	West	22.6	Flat	East	26.4	7.8	4.5	-3.3	0.5	-4.5	3.3	-0.5
OSullivan Beach	December 21	2	23	No	3:36pm	25	0	Lower	Diloma concamerata	Dry	30.7	Centre	Flat	32.7	Edge	West	27.5	Flat	East	30.1	5.2	2	-3.2	-0.6	-2	3.2	0.6
OSullivan Beach	December 21	2	24	Yes	3:37pm	25	0	Lower	Diloma concamerata	Dry	27.3	Centre	Flat	29.7	Edge	West	23.8	Depression	West	27.4	5.9	2.4	-3.5	0.1	-2.4	3.5	-0.1
OSullivan Beach	December 21	2	27	Yes	3:40pm	25	0	Lower	Diloma concamerata	Dry	30.1	West	Flat	37.3	Edge	Centre	27.5	Edge	West	32	9.8	7.2	-2.6	1.9	-7.2	2.6	-1.9
OSullivan Beach	December 21	2	28	No	3:41pm	25	0	Lower	Diloma concamerata	Dry	29	Centre	Flat	35.2	Edge	West	24.1	Depression	East	29.5	11.1	6.2	-4.9	0.5	-6.2	4.9	-0.5
OSullivan Beach	December 21	2	29	No	3:43pm	25	0	Lower	Diloma concamerata	Wet	27.3	East	Flat	34.1	Edge	West	25.6	Flat	East	29	8.5	6.8	-1.7	1.7	-6.8	1.7	-1.7
OSullivan Beach	December 21	2	30	No	3:44pm	25	0	Lower	Diloma concamerata	Dry	29.5	Centre	Flat	33.9	Edge	West	21.5	Edge	East	28.3	12.4	4.4	-8	-1.2	-4.4	8	1.2
OSullivan Beach	December 21	2	31	No	3:46pm	25	0	Lower	Diloma concamerata	Dry	25	West	Depression	30	Flat	Centre	22.2	Flat	Centre	26.3	7.8	5	-2.8	1.3	-5	2.8	-1.3
OSullivan Beach	December 21	2	32	No	3:47pm	25	0	Lower	Diloma concamerata	Dry	29.9	Centre	Flat	36.3	Edge	Centre	26.8	Flat	West	30.8	9.5	6.4	-3.1	0.9	-6.4	3.1	-0.9
OSullivan Beach	December 21	2	33	No	3:48pm	25	0	Lower	Diloma concamerata	Dry	27	East	Flat	32.5	Edge	West	25.8	Flat	Centre	28.2	6.7	5.5	-1.2	1.2	-5.5	1.2	-1.2
OSullivan Beach	December 21	2	34	No	3:49pm	25	0	Lower	Diloma concamerata	Dry	24.2	Centre	Flat	32.5	Edge	Centre	22.7	Flat	Centre	27.3	9.8	8.3	-1.5	3.1	-8.3	1.5	-3.1
OSullivan Beach	December 21	2	35	No	3:50pm	25	0	Lower	Diloma concamerata	Dry	32.8	Centre	Edge	35.4	Edge	West	24.5	Flat	Centre	29.8	10.9	2.6	-8.3	-3	-2.6	8.3	3
OSullivan Beach	December 21	2	36	No	3:51pm	25	0	Lower	Diloma concamerata	Dry	29.8	Centre	Peak	34.8	Edge	West	24	Flat	East	29.3	10.8	5	-5.8	-0.5	-5	5.8	0.5
OSullivan Beach	December 21	2	37	Yes	3:53pm	25	0	Lower	Diloma concamerata	Dry	28.4	Centre	Flat	32.9	Edge	Centre	26.4	Peak	Centre	30.6	6.5	4.5	-2	2.2	-4.5	2	-2.2
OSullivan Beach	December 21	2	4	No	3:08pm	25	0	Lower	Bembicium nanum	Dry	27.3	West	Edge	28.8	Edge	West	19.2	Depression	East	24	9.6	1.5	-8.1	-3.3	-1.5	8.1	3.3
OSullivan Beach	December 21	2	8	Yes	3:13pm	25	0	Lower	Bembicium nanum	Dry	26.7	West	Flat	32.5	Edge	West	25.7	Flat	East	28.4	6.8	5.8	-1	1.7	-5.8	1	-1.7
OSullivan Beach	December 21	2	15	No	3:25pm	25	0	Lower	Bembicium nanum	Dry	32.2	West	Edge	33.2	Edge	West	24	Flat	East	27.9	9.2	1	-8.2	-4.3	-1	8.2	4.3
OSullivan Beach	December 21	2	30	No	3:44pm	25	0	Lower	Bembicium nanum	Dry	28.7	West	Flat	33.9	Edge	West	21.5	Edge	East	28.3	12.4	5.2	-7.2	-0.4	-5.2	7.2	0.4
OSullivan Beach	December 21	2	38	Yes	4:06pm	25	0	Upper	Bembicium nanum	Dry	30.1	East	Depression	35.2	Depression	West	25.5	Flat	East	30.4	9.7	5.1	-4.6	0.3	-5.1	4.6	-0.3
OSullivan Beach	December 21	2	39	Yes	4:07pm	25	0	Upper	Bembicium nanum	Dry	29.9	West	Flat	34.1	Flat	West	26.9	Flat	East	30.3	7.2	4.2	-3	0.4	-4.2	3	-0.4
OSullivan Beach	December 21	2	40	Yes	4:08pm	25	0	Upper	Bembicium nanum	Dry	34.4	Centre	Edge	40	Edge	West	26.5	Flat	East	32.1	13.5	5.6	-7.9	-2.3	-5.6	7.9	2.3
OSullivan Beach	December 21	2	41	Yes	4:10pm	25	0	Upper	Bembicium nanum	Dry	34	Centre	Flat	35.6	Edge	Centre	28.2	Flat	East	31.7	7.4	1.6	-5.8	-2.3	-1.6	5.8	2.3
OSullivan Beach	December 21	2	42	Yes	4:12pm	25	0	Upper	Bembicium nanum	Dry	34.6	East	Edge	35.8	Edge	West	24.3	Flat	Centre	28.8	11.5	1.2	-10.3	-5.8	-1.2	10.3	5.8
OSullivan Beach	December 21	2	43	Yes	4:14pm	25	0	Upper	Bembicium nanum	Dry	31.1	Centre	Flat	36.1	Edge	West	27.4	Flat	Centre	30.4	8.7	5	-3.7	-0.7	-5	3.7	0.7
OSullivan Beach	December 21	2	44	Yes	4:15pm	25	0	Upper	Bembicium nanum	Dry	34.1	Centre	Flat	38.7	Edge	West	32.2	Flat	Centre	34.3	6.5	4.6	-1.9	0.2	-4.6	1.9	-0.2
OSullivan Beach	December 21	2	45	Yes	4:18pm	25	0	Upper	Bembicium nanum	Dry	30.6	East	Flat	35.5	Edge	West	26.3	Flat	Centre	31.3	9.2	4.9	-4.3	0.7	-4.9	4.3	-0.7
OSullivan Beach	December 21	2	46	Yes	4:19pm	25	0	Upper	Bembicium nanum	Dry	35.2	Centre	Flat	39.5	Edge	West	30.1	Flat	Centre	33.9	9.4	4.3	-5.1	-1.3	-4.3	5.1	1.3
OSullivan Beach	December 21	2	47	Yes	4:21pm	25	0	Upper	Bembicium nanum	Dry	33.6	Centre	Flat	38.5	Depression	Centre	29.3	Flat	Centre	33.2	9.2	4.9	-4.3	-0.4	-4.9	4.3	0.4
OSullivan Beach	December 21	2	48	Yes	4:24pm	25	0	Upper	Bembicium nanum	Dry	34	Centre	Depression	38.8	Flat	Centre	27.5	Flat	Centre	31.5	11.3	4.8	-6.5	-2.5	-4.8	6.5	2.5
OSullivan Beach	December 21	2	49	Yes	4:25pm	25	0	Upper	Bembicium nanum	Dry	31.6	East	Flat	37.2	Edge	Centre	27.6	Flat	Centre	31.4	9.6	5.6	-4	-0.2	-5.6	4	0.2
OSullivan Beach	December 21	2	50	Yes	4:27pm	25	0	Upper	Bembicium nanum	Dry	31.4	East	Flat	39.7	Flat	West	29	Flat	East	33.9	10.7	8.3	-2.4	2.5	-8.3	2.4	-2.5
OSullivan Beach	December 21	2	51	Yes	4:28pm	25	0	Upper	Bembicium nanum	Dry	32.6	Centre	Edge	37.4	Flat	Centre	30	Flat	Centre	33.4	7.4	4.8	-2.6	0.8	-4.8	2.6	-0.8
OSullivan Beach	December 21	2	52	Yes	4:30pm	25	0	Upper	Bembicium nanum	Dry	37.4	West	Edge	39.7	Edge	West	32.9	Flat	East	35.3	6.8	2.3	-4.5	-2.1	-2.3	4.5	2.1
OSullivan Beach	December 21	2	53	Yes	4:31pm	25	0	Upper	Bembicium nanum	Dry	30	East	Flat	37.1	Edge	West	27.3	Flat	East	31.6	9.8	7.1	-2.7	1.6	-7.1	2.7	-1.6
OSullivan Beach	December 21	2	54	Yes	4:33pm	25	0	Upper	Bembicium nanum	Dry	37.3	West	Edge	39.7	Edge	West	31.3	Flat	East	35.2	8.4	2.4	-6	-2.1	-2.4	6	2.1
OSullivan Beach	December 21	2	55	Yes	4:34pm	25	0	Upper	Bembicium nanum	Dry	36.6	Centre	Flat	42.4	Flat	West	27.6	Flat	East	33.7	14.8	5.8	-9	-2.9	-5.8	9	2.9
OSullivan Beach	December 21	2	56	Yes	4:35pm	25	0	Upper	Bembicium nanum	Dry	32.6	East	Depression	34.6	Flat	East	24.7	Edge	West	29.9	9.9	2	-7.9	-2.7	-2	7.9	2.7
OSullivan Beach	December 21	2	57	Yes	4:36pm	25	0	Upper	Bembicium nanum	Dry	34.3	Centre	Flat	37.8	Edge	West	30.1	Flat	East	33.2	7.7	3.5	-4.2	-1.1	-3.5	4.2	1.1
OSullivan Beach	December 21	2	58	Yes	4:38pm	25	0	Upper	Bembicium nanum	Dry	30.9	Centre	Flat	38	Flat	Centre	27.5	Flat	East	31.8	10.5	7.1	-3.4	0.9	-7.1	3.4	-0.9
OSullivan Beach	December 21	2	59	Yes	4:41pm	25	0	Upper	Bembicium nanum	Dry	34.3	Centre	Flat	38	Flat	Centre	27.1	Flat	West	32.6	10.9	3.7	-7.2	-1.7	-3.7	7.2	1.7
OSullivan Beach	December 21	2	60	Yes	4:44pm	25	0	Upper	Bembicium nanum	Dry	30.7	Centre	Flat	34.1	Depression	West	24.7	Flat	Centre	29.5	9.4	3.4	-6	-1.2	-3.4	6	1.2
OSullivan Beach	December 21	2	61	Yes	4:45pm	25	0	Upper	Bembicium nanum	Dry	30.3	Centre	Flat	35	Edge	West	27	Flat	Centre	30.3	8	4.7	-3.3	0	-4.7	3.3	0
OSullivan Beach	December 21	2	62	Yes	4:47pm	25	0	Upper	Bembicium nanum	Dry	30.4	East	Flat	36	Edge	West	27.8	Flat	Centre	31.4	8.2	5.6	-2.6	1	-5.6	2.6	-1
OSullivan Beach	December 21	2	63	Yes	4:49pm	25	0	Upper	Bembicium nanum	Dry	32.1	East	Flat	37	Flat	West	27.8	Edge	East	32.9	9.2	4.9	-4.3	0.8	-4.9	4.3	-0.8
OSullivan Beach	January 3	4	2	Yes	3:02pm	28	0	Lower	Nerita atramentosa	Dry	32.4	Centre	Flat	35.8	Edge	East	29.9	Flat	Centre	32.7	5.9	3.4	-2.5	0.3	-3.4	2.5	-0.3
OSullivan Beach	January 3	4	3	Yes	3:03pm	28	0	Lower	Nerita atramentosa	Dry	33.5	Centre	Flat	35.6	Edge	West	26.2	Flat	Centre	31.6	9.4	2.1	-7.3	-1.9	-2.1	7.3	1.9
OSullivan Beach	January 3	4	4	Yes	3:04pm	28	0	Lower	Nerita atramentosa	Dry	37.5	Centre	Flat	40.1	Edge	Centre	31.1	Flat	Centre	37.3	9	2.6	-6.4	-0.2	-2.6	6.4	0.2
OSullivan Beach	January 3	4	5	Yes	3:06pm	28	0	Lower	Nerita atramentosa	Dry	30.5	Centre	Flat	36.7	Edge	West	27.4	Flat	Centre	31.7	9.3	6.2	-3.1	1.2	-6.2	3.1	-1.2
OSullivan Beach	January 3	4	6	Yes	3:08pm	28	0	Lower	Nerita atramentosa	Dry	30.8	Centre	Flat	35.7	Edge	West	28	Flat	Centre	32.4	7.7	4.9	-2.8	1.6	-4.9	2.8	-1.6
OSullivan Beach	January 3	4	7	Yes	3:09pm	28	0	Lower	Nerita atramentosa	Dry	32.5	Centre	Flat	36.2	Flat	West	31.4	Flat	Centre	33.5	4.8	3.7	-1.1	1	-3.7	1.1	-1
OSullivan Beach	January 3	4	8	Yes	3:10pm	28	0	Lower	Nerita atramentosa	Wet	32	Centre	Flat	34.6	Edge	East	25.3	Flat	Centre	30.2	9.3	2.6	-6.7	-1.8	-2.6	6.7	1.8
OSullivan Beach	January 3	4	9	Yes	3:11pm	28	0	Lower	Nerita atramentosa	Dry	33.6	Centre	Edge	38.3	Edge	West	29.7	Flat	Centre	34.6	8.6	4.7	-3.9	1	-4.7	3.9	-1
OSullivan Beach	January 3	4	10	Yes	3:13pm	28	0	Lower	Nerita atramentosa	Dry	31	Centre	Flat	35.3	Edge	West	26.2	Flat	Centre	30.9	9.1	4.3	-4.8	-0.1	-4.3	4.8	0.1
OSullivan Beach	January 3	4	12	Yes	3:14pm	28	0	Lower	Nerita atramentosa	Wet	30.8	Centre	Flat	35.3	Edge	Centre	26.7	Edge	Centre	30.1	8.6	4.5	-4.1	-0.7	-4.5	4.1	0.7
OSullivan Beach	January 3	4	13	Yes	3:16pm	28	0	Lower	Nerita atramentosa	Dry	32.6	West	Edge	37.4	Edge	West	28.7	Flat	Centre	32.5	8.7	4.8	-3.9	-0.1	-4.8	3.9	0.1
OSullivan Beach	January 3	4	14	Yes	3:17pm	28	0	Lower	Nerita atramentosa	Dry	32	Centre	Flat	36.8	Edge	West	28.1	Edge	East	32.1	8.7	4.8	-3.9	0.1	-4.8	3.9	-0.1
OSullivan Beach	January 3	4	15	Yes	3:18pm	28	0	Lower	Nerita atramentosa	Dry	33	West	Edge	38.3	Edge	West	27.8	Flat	East	32.9	10.5	5.3	-5.2	-0.1	-5.3	5.2	0.1
OSullivan Beach	January 3	4	16	Yes	3:19pm	28	0	Lower	Nerita atramentosa	Dry	37	Centre	Flat	41.3	Edge	East	32.4	Flat	Centre	36.9	8.9	4.3	-4.6	-0.1	-4.3	4.6	0.1
OSullivan Beach	January 3	4	17	Yes	3:20pm	28	0	Lower	Nerita atramentosa	Dry	30.6	East	Edge	38.2	Flat	West	25.5	Flat	Centre	34.1	12.7	7.6	-5.1	3.5	-7.6	5.1	-3.5
OSullivan Beach	January 3	4	18	Yes	3:20pm	28	0	Lower	Nerita atramentosa	Dry	29.1	Centre	Flat	35.9	Edge	West	26.7	Flat	East	31.5	9.2	6.8	-2.4	2.4	-6.8	2.4	-2.4
OSullivan Beach	January 3	4	19	Yes	3:21pm	28	0	Lower	Nerita atramentosa	Wet	33.1	East	Edge	37.7	Flat	West	29.2	Flat	East	33.5	8.5	4.6	-3.9	0.4	-4.6	3.9	-0.4
OSullivan Beach	January 3	4	21	Yes	3:23pm	28	0	Lower	Nerita atramentosa	Dry	28.5	East	Flat	38.8	Edge	West	28	Flat	East	31.5	10.8	10.3	-0.5	3	-10.3	0.5	-3
OSullivan Beach	January 3	4	22	Yes	3:24pm	28	0	Lower	Nerita atramentosa	Dry	33.6	West	Flat	36.6	Depression	West	28.7	Flat	East	32.5	7.9	3	-4.9	-1.1	-3	4.9	1.1
OSullivan Beach	January 3	4	24	Yes	3:26pm	28	0	Lower	Nerita atramentosa	Wet	32.2	Centre	Flat	35.2	Edge	West	28.5	Edge	East	32.4	6.7	3	-3.7	0.2	-3	3.7	-0.2
OSullivan Beach	January 3	4	25	Yes	3:28pm	28	0	Lower	Nerita atramentosa	Dry	36.8	East	Edge	42	Edge	West	30.1	Flat	East	35.6	11.9	5.2	-6.7	-1.2	-5.2	6.7	1.2
OSullivan Beach	January 3	4	27	Yes	3:30pm	28	0	Lower	Nerita atramentosa	Dry	30.3	Centre	Flat	38.6	Edge	West	28.3	Flat	East	32.3	10.3	8.3	-2	2	-8.3	2	-2
OSullivan Beach	January 3	4	29	Yes	3:32pm	28	0	Lower	Nerita atramentosa	Wet	29.5	Centre	Flat	34.9	Edge	East	24	Flat	Centre	30	10.9	5.4	-5.5	0.5	-5.4	5.5	-0.5
OSullivan Beach	January 3	4	31	Yes	3:34pm	28	0	Lower	Nerita atramentosa	Wet	30.1	Centre	Flat	35.6	Edge	Centre	26.4	Flat	Centre	30.6	9.2	5.5	-3.7	0.5	-5.5	3.7	-0.5
OSullivan Beach	January 3	4	32	Yes	3:35pm	28	0	Lower	Nerita atramentosa	Wet	33	West	Edge	34.9	Edge	East	28.8	Flat	Centre	31.2	6.1	1.9	-4.2	-1.8	-1.9	4.2	1.8
OSullivan Beach	January 3	4	34	Yes	3:37pm	28	0	Lower	Nerita atramentosa	Wet	26.9	Centre	Flat	33.8	Edge	West	25.2	Flat	East	29.1	8.6	6.9	-1.7	2.2	-6.9	1.7	-2.2
OSullivan Beach	January 3	4	35	Yes	3:38pm	28	0	Lower	Nerita atramentosa	Wet	30.7	Centre	Flat	38.2	Edge	West	28.9	Peak	East	33.8	9.3	7.5	-1.8	3.1	-7.5	1.8	-3.1
OSullivan Beach	January 3	4	40	Yes	3:47pm	28	0	Lower	Nerita atramentosa	Dry	31.3	Centre	Flat	36.4	Edge	West	25.4	Flat	Centre	31.7	11	5.1	-5.9	0.4	-5.1	5.9	-0.4
OSullivan Beach	January 3	4	41	Yes	3:49pm	28	0	Lower	Nerita atramentosa	Wet	30.1	Centre	Flat	33.1	Edge	East	27.6	Peak	East	29.9	5.5	3	-2.5	-0.2	-3	2.5	0.2
OSullivan Beach	January 3	4	42	Yes	3:50pm	28	0	Lower	Nerita atramentosa	Wet	28.2	Centre	Depression	33.3	Edge	East	25.1	Peak	West	28.7	8.2	5.1	-3.1	0.5	-5.1	3.1	-0.5
OSullivan Beach	January 3	4	5	No	3:06pm	28	0	Lower	Diloma concamerata	Dry	32.3	Centre	Drop	36.7	Edge	West	27.4	Flat	Centre	31.7	9.3	4.4	-4.9	-0.6	-4.4	4.9	0.6
OSullivan Beach	January 3	4	11	Yes	3:14pm	28	0	Lower	Diloma concamerata	Dry	32.8	Centre	Flat	39.1	Edge	Centre	30.3	Flat	Centre	34.3	8.8	6.3	-2.5	1.5	-6.3	2.5	-1.5
OSullivan Beach	January 3	4	12	No	3:14pm	28	0	Lower	Diloma concamerata	Wet	30.3	Centre	Flat	35.3	Flat	Centre	25.8	Edge	Centre	30.1	9.5	5	-4.5	-0.2	-5	4.5	0.2
OSullivan Beach	January 3	4	14	No	3:17pm	28	0	Lower	Diloma concamerata	Wet	30.8	Centre	Edge	36.8	Edge	West	28.1	Edge	East	32.1	8.7	6	-2.7	1.3	-6	2.7	-1.3
OSullivan Beach	January 3	4	18	No	3:20pm	28	0	Lower	Diloma concamerata	Dry	30.3	Centre	Flat	35.9	Edge	West	26.7	Flat	West	31.5	9.2	5.6	-3.6	1.2	-5.6	3.6	-1.2
OSullivan Beach	January 3	4	19	No	3:21pm	28	0	Lower	Diloma concamerata	Wet	32.8	Centre	Flat	37.7	Edge	West	29.2	Flat	East	33.5	8.5	4.9	-3.6	0.7	-4.9	3.6	-0.7
OSullivan Beach	January 3	4	20	Yes	3:22pm	28	0	Lower	Diloma concamerata	Wet	30.5	East	Flat	35	Depression	West	26.4	Flat	Centre	30.4	8.6	4.5	-4.1	-0.1	-4.5	4.1	0.1
OSullivan Beach	January 3	4	21	No	3:23pm	28	0	Lower	Diloma concamerata	Wet	30	Centre	Flat	38.8	Edge	West	27.8	Flat	Centre	31.5	11	8.8	-2.2	1.5	-8.8	2.2	-1.5
OSullivan Beach	January 3	4	23	Yes	3:25pm	28	0	Lower	Diloma concamerata	Dry	31.4	Centre	Flat	41.7	Peak	West	28.7	Peak	East	33.2	13	10.3	-2.7	1.8	-10.3	2.7	-1.8
OSullivan Beach	January 3	4	26	Yes	3:29pm	28	0	Lower	Diloma concamerata	Wet	33.1	Centre	Flat	41.7	Flat	West	27.4	Flat	Centre	33.8	14.3	8.6	-5.7	0.7	-8.6	5.7	-0.7
OSullivan Beach	January 3	4	29	No	3:32pm	28	0	Lower	Diloma concamerata	Dry	29.4	Centre	Depression	34.9	Flat	East	24	Flat	Centre	30	10.9	5.5	-5.4	0.6	-5.5	5.4	-0.6
OSullivan Beach	January 3	4	30	Yes	3:33pm	28	0	Lower	Diloma concamerata	Dry	30.3	Centre	Flat	37.8	Edge	West	24.6	Peak	Centre	32	13.2	7.5	-5.7	1.7	-7.5	5.7	-1.7
OSullivan Beach	January 3	4	31	No	3:34pm	28	0	Lower	Diloma concamerata	Wet	31	East	Flat	35.6	Edge	Centre	26.8	Flat	Centre	30.6	8.8	4.6	-4.2	-0.4	-4.6	4.2	0.4
OSullivan Beach	January 3	4	32	No	3:35pm	28	0	Lower	Diloma concamerata	Wet	30.3	Centre	Flat	34.9	Depression	East	28.8	Flat	Centre	31.2	6.1	4.6	-1.5	0.9	-4.6	1.5	-0.9
OSullivan Beach	January 3	4	33	Yes	3:36pm	28	0	Lower	Diloma concamerata	Dry	34	Centre	Flat	38.4	Edge	West	30.2	Flat	East	33.9	8.2	4.4	-3.8	-0.1	-4.4	3.8	0.1
OSullivan Beach	January 3	4	34	No	3:37pm	28	0	Lower	Diloma concamerata	Wet	28.9	Centre	Flat	33.8	Edge	West	25.2	Flat	East	29.1	8.6	4.9	-3.7	0.2	-4.9	3.7	-0.2
OSullivan Beach	January 3	4	35	No	3:38pm	28	0	Lower	Diloma concamerata	Wet	31.1	East	Flat	38.2	Flat	West	28.9	Peak	East	33.8	9.3	7.1	-2.2	2.7	-7.1	2.2	-2.7
OSullivan Beach	January 3	4	36	Yes	3:39pm	28	0	Lower	Diloma concamerata	Wet	30.5	East	Flat	35.1	Edge	Centre	25.9	Flat	Centre	30.5	9.2	4.6	-4.6	0	-4.6	4.6	0
OSullivan Beach	January 3	4	37	Yes	3:42pm	28	0	Lower	Diloma concamerata	Wet	30.4	East	Flat	36.8	Flat	West	27.2	Flat	Centre	30.9	9.6	6.4	-3.2	0.5	-6.4	3.2	-0.5
OSullivan Beach	January 3	4	38	Yes	3:45pm	28	0	Lower	Diloma concamerata	Dry	30.1	West	Flat	36.3	Edge	West	25.6	Flat	Centre	30.2	10.7	6.2	-4.5	0.1	-6.2	4.5	-0.1
OSullivan Beach	January 3	4	39	Yes	3:46pm	28	0	Lower	Diloma concamerata	Dry	27.7	Centre	Flat	32.8	Edge	East	26.1	Flat	Centre	29.1	6.7	5.1	-1.6	1.4	-5.1	1.6	-1.4
OSullivan Beach	January 3	4	40	No	3:47pm	28	0	Lower	Diloma concamerata	Dry	31.3	East	Flat	36.4	Edge	West	25.4	Flat	Centre	31.7	11	5.1	-5.9	0.4	-5.1	5.9	-0.4
OSullivan Beach	January 3	4	41	No	3:49pm	28	0	Lower	Diloma concamerata	Wet	30	Centre	Flat	33.1	Edge	East	27	Edge	East	29.9	6.1	3.1	-3	-0.1	-3.1	3	0.1
OSullivan Beach	January 3	4	42	No	3:50pm	28	0	Lower	Diloma concamerata	Wet	28.4	West	Edge	33.3	Edge	East	25.1	Edge	West	28.7	8.2	4.9	-3.3	0.3	-4.9	3.3	-0.3
OSullivan Beach	January 3	4	43	Yes	3:52pm	28	0	Lower	Diloma concamerata	Wet	29.4	East	Flat	36.3	Flat	West	28	Flat	Centre	32.1	8.3	6.9	-1.4	2.7	-6.9	1.4	-2.7
OSullivan Beach	January 3	4	44	Yes	3:53pm	28	0	Lower	Diloma concamerata	Wet	30.4	East	Flat	32.5	Flat	West	26.1	Flat	Centre	30.1	6.4	2.1	-4.3	-0.3	-2.1	4.3	0.3
OSullivan Beach	January 3	4	45	Yes	3:54pm	28	0	Lower	Diloma concamerata	Wet	33.1	East	Drop	37.8	Edge	East	28.8	Flat	Centre	32.1	9	4.7	-4.3	-1	-4.7	4.3	1
OSullivan Beach	January 3	4	46	Yes	3:55pm	28	0	Lower	Diloma concamerata	Wet	32.6	Centre	Flat	34.9	Flat	Centre	28.4	Peak	Centre	32	6.5	2.3	-4.2	-0.6	-2.3	4.2	0.6
OSullivan Beach	January 3	4	47	Yes	3:56pm	28	0	Lower	Diloma concamerata	Wet	33.4	Centre	Flat	37.8	Flat	West	28.3	Flat	Centre	32.2	9.5	4.4	-5.1	-1.2	-4.4	5.1	1.2
OSullivan Beach	January 3	4	58	Yes	4:14pm	27	0	Upper	Diloma concamerata	Wet	29.8	Centre	Flat	32.9	Edge	Centre	27.3	Flat	East	30.7	5.6	3.1	-2.5	0.9	-3.1	2.5	-0.9
OSullivan Beach	January 3	4	1	No	3:00pm	28	0	Lower	Bembicium nanum	Dry	36.8	West	Edge	39.7	Flat	West	29.3	Flat	Centre	35.4	10.4	2.9	-7.5	-1.4	-2.9	7.5	1.4
OSullivan Beach	January 3	4	7	No	3:09pm	28	0	Lower	Bembicium nanum	Dry	34.4	Centre	Flat	36.2	Edge	West	31	Flat	Centre	33.5	5.2	1.8	-3.4	-0.9	-1.8	3.4	0.9
OSullivan Beach	January 3	4	48	Yes	3:57pm	28	0	Lower	Bembicium nanum	Dry	35.1	West	Flat	45.1	Depression	East	28.2	Flat	Centre	34.1	16.9	10	-6.9	-1	-10	6.9	1
OSullivan Beach	January 3	4	49	Yes	4:03pm	27	0	Upper	Bembicium nanum	Dry	33.9	Centre	Drop	37.8	Depression	West	29	Flat	Centre	34.1	8.8	3.9	-4.9	0.2	-3.9	4.9	-0.2
OSullivan Beach	January 3	4	50	Yes	4:05pm	27	0	Upper	Bembicium nanum	Dry	36.7	East	Flat	43.1	Edge	West	31.3	Peak	East	35.4	11.8	6.4	-5.4	-1.3	-6.4	5.4	1.3
OSullivan Beach	January 3	4	51	Yes	4:06pm	27	0	Upper	Bembicium nanum	Dry	34.8	East	Edge	37.6	Depression	Centre	27.8	Flat	East	32.4	9.8	2.8	-7	-2.4	-2.8	7	2.4
OSullivan Beach	January 3	4	52	Yes	4:07pm	27	0	Upper	Bembicium nanum	Dry	34.4	Centre	Flat	39.8	Edge	West	30.6	Peak	Centre	35.3	9.2	5.4	-3.8	0.9	-5.4	3.8	-0.9
OSullivan Beach	January 3	4	53	Yes	4:09pm	27	0	Upper	Bembicium nanum	Dry	38.4	Centre	Flat	41	Depression	West	32.6	Edge	Centre	36.2	8.4	2.6	-5.8	-2.2	-2.6	5.8	2.2
OSullivan Beach	January 3	4	54	Yes	4:10pm	27	0	Upper	Bembicium nanum	Dry	36.4	Centre	Flat	40.1	Edge	West	32.7	Flat	Centre	35.7	7.4	3.7	-3.7	-0.7	-3.7	3.7	0.7
OSullivan Beach	January 3	4	55	Yes	4:11pm	27	0	Upper	Bembicium nanum	Dry	33	East	Flat	35.5	Depression	Centre	26.5	Flat	Centre	31.2	9	2.5	-6.5	-1.8	-2.5	6.5	1.8
OSullivan Beach	January 3	4	56	Yes	4:12pm	27	0	Upper	Bembicium nanum	Dry	33.4	East	Edge	39.3	Edge	Centre	30.2	Flat	Centre	34.2	9.1	5.9	-3.2	0.8	-5.9	3.2	-0.8
OSullivan Beach	January 3	4	57	Yes	4:13pm	27	0	Upper	Bembicium nanum	Dry	34	West	Peak	37.9	Edge	West	30.5	Flat	East	33.9	7.4	3.9	-3.5	-0.1	-3.9	3.5	0.1
OSullivan Beach	January 3	4	59	Yes	4:16pm	27	0	Upper	Bembicium nanum	Dry	37.3	West	Flat	40.1	Edge	West	33.5	Flat	East	35.5	6.6	2.8	-3.8	-1.8	-2.8	3.8	1.8
OSullivan Beach	January 3	4	60	Yes	4:18pm	27	0	Upper	Bembicium nanum	Dry	35.5	Centre	Flat	42.2	Edge	Centre	31.5	Flat	Centre	36.2	10.7	6.7	-4	0.7	-6.7	4	-0.7
OSullivan Beach	January 3	4	61	Yes	4:19pm	27	0	Upper	Bembicium nanum	Dry	33.6	East	Flat	37.8	Flat	West	28.1	Edge	Centre	33	9.7	4.2	-5.5	-0.6	-4.2	5.5	0.6
OSullivan Beach	January 3	4	62	Yes	4:21pm	27	0	Upper	Bembicium nanum	Dry	34.8	Centre	Edge	39.2	Edge	East	29.8	Flat	Centre	34.5	9.4	4.4	-5	-0.3	-4.4	5	0.3
OSullivan Beach	January 3	4	63	Yes	4:23pm	27	1	Upper	Bembicium nanum	Dry	30.9	East	Flat	36.3	Flat	Centre	29	Flat	East	32.4	7.3	5.4	-1.9	1.5	-5.4	1.9	-1.5
OSullivan Beach	January 3	4	64	Yes	4:24pm	27	1	Upper	Bembicium nanum	Dry	30.1	Centre	Flat	36.1	Edge	East	26.7	Flat	East	30.1	9.4	6	-3.4	0	-6	3.4	0
OSullivan Beach	January 3	4	65	Yes	4:25pm	27	1	Upper	Bembicium nanum	Dry	36.8	East	Drop	41.5	Edge	West	32.1	Flat	East	36.2	9.4	4.7	-4.7	-0.6	-4.7	4.7	0.6
OSullivan Beach	January 3	4	66	Yes	4:26pm	27	1	Upper	Bembicium nanum	Dry	34.1	West	Edge	37.6	Edge	West	28.6	Edge	East	32	9	3.5	-5.5	-2.1	-3.5	5.5	2.1
OSullivan Beach	January 3	4	67	Yes	4:27pm	27	1	Upper	Bembicium nanum	Dry	33.3	East	Flat	39.2	Drop	West	30.8	Peak	Centre	35	8.4	5.9	-2.5	1.7	-5.9	2.5	-1.7
OSullivan Beach	January 3	4	68	Yes	4:28pm	27	1	Upper	Bembicium nanum	Dry	35.9	West	Flat	38.4	Edge	West	30.6	Edge	Centre	34.9	7.8	2.5	-5.3	-1	-2.5	5.3	1
OSullivan Beach	January 3	4	69	Yes	4:29pm	27	1	Upper	Bembicium nanum	Dry	34.1	West	Depression	39	Depression	West	30	Edge	East	34.3	9	4.9	-4.1	0.2	-4.9	4.1	-0.2
OSullivan Beach	January 3	4	70	Yes	4:30pm	27	1	Upper	Bembicium nanum	Dry	35.1	Centre	Flat	38.2	Edge	West	30.9	Flat	Centre	34.4	7.3	3.1	-4.2	-0.7	-3.1	4.2	0.7
OSullivan Beach	January 3	4	71	Yes	4:31pm	27	1	Upper	Bembicium nanum	Dry	34.8	Centre	Flat	38.8	Depression	West	31.4	Flat	Centre	34.3	7.4	4	-3.4	-0.5	-4	3.4	0.5
OSullivan Beach	January 3	4	72	Yes	4:33pm	27	1	Upper	Bembicium nanum	Dry	38.4	Centre	Edge	42	Edge	Centre	35.8	Flat	Centre	38.7	6.2	3.6	-2.6	0.3	-3.6	2.6	-0.3
OSullivan Beach	January 3	4	73	Yes	4:34pm	27	1	Upper	Bembicium nanum	Dry	33.4	East	Flat	40.2	Edge	West	31	Depression	Centre	35	9.2	6.8	-2.4	1.6	-6.8	2.4	-1.6
OSullivan Beach	January 3	4	74	Yes	4:35pm	27	1	Upper	Bembicium nanum	Dry	33	East	Flat	38.3	Flat	Centre	29.1	Flat	Centre	34.7	9.2	5.3	-3.9	1.7	-5.3	3.9	-1.7
OSullivan Beach	January 3	4	75	Yes	4:36pm	27	1	Upper	Bembicium nanum	Wet	31.4	Centre	Edge	36.5	Edge	West	25.2	Flat	East	30.4	11.3	5.1	-6.2	-1	-5.1	6.2	1
OSullivan Beach	January 3	4	76	Yes	4:37pm	27	1	Upper	Bembicium nanum	Dry	32.4	Centre	Flat	41	Depression	Centre	30.5	Flat	Centre	35.5	10.5	8.6	-1.9	3.1	-8.6	1.9	-3.1
Marino Rocks	January 4	6	1	Yes	3:15pm	33	0	Lower	Nerita atramentosa	Wet	31.2	East	Edge	40.2	Edge	West	29.4	Flat	Centre	34	10.8	9	-1.8	2.8	-9	1.8	-2.8
Marino Rocks	January 4	6	2	Yes	3:16pm	33	0	Lower	Nerita atramentosa	Dry	34.2	East	Flat	44	Edge	West	31.3	Flat	East	38.4	12.7	9.8	-2.9	4.2	-9.8	2.9	-4.2
Marino Rocks	January 4	6	9	Yes	3:31pm	33	0	Lower	Nerita atramentosa	Wet	32.5	West	Edge	38.4	Edge	Centre	31.4	Flat	Centre	33.5	7	5.9	-1.1	1	-5.9	1.1	-1
Marino Rocks	January 4	6	11	Yes	3:35pm	33	0	Lower	Nerita atramentosa	Wet	36.4	Centre	Flat	47.1	Edge	West	34.4	Flat	Centre	38.6	12.7	10.7	-2	2.2	-10.7	2	-2.2
Marino Rocks	January 4	6	12	Yes	3:37pm	33	0	Lower	Nerita atramentosa	Wet	32.3	East	Edge	40.8	Edge	Centre	31.9	Peak	Centre	35.6	8.9	8.5	-0.4	3.3	-8.5	0.4	-3.3
Marino Rocks	January 4	6	13	Yes	3:39pm	33	0	Lower	Nerita atramentosa	Wet	39.1	West	Flat	45	Edge	West	33.3	Flat	Centre	36.8	11.7	5.9	-5.8	-2.3	-5.9	5.8	2.3
Marino Rocks	January 4	6	14	Yes	3:40pm	33	0	Lower	Nerita atramentosa	Wet	34.5	East	Flat	38.6	Edge	East	29.4	Flat	West	32.4	9.2	4.1	-5.1	-2.1	-4.1	5.1	2.1
Marino Rocks	January 4	6	16	Yes	3:43pm	33	0	Lower	Nerita atramentosa	Wet	30.7	East	Edge	39.2	Edge	West	30.7	Edge	East	33.6	8.5	8.5	0	2.9	-8.5	0	-2.9
Marino Rocks	January 4	6	3	Yes	3:20pm	33	0	Lower	Nerita atramentosa	Dry	34.2	Centre	Flat	42.3	Edge	West	30.3	Flat	Centre	36.4	12	8.1	-3.9	2.2	-8.1	3.9	-2.2
Marino Rocks	January 4	6	18	Yes	3:47pm	33	0	Lower	Nerita atramentosa	Dry	38.6	Centre	Flat	44.2	Edge	West	35.7	Edge	East	39.9	8.5	5.6	-2.9	1.3	-5.6	2.9	-1.3
Marino Rocks	January 4	6	19	Yes	3:48pm	33	0	Lower	Nerita atramentosa	Wet	28.9	Centre	Edge	39	Edge	West	27.7	Flat	East	32.3	11.3	10.1	-1.2	3.4	-10.1	1.2	-3.4
Marino Rocks	January 4	6	20	Yes	4:02pm	33	0	Lower	Nerita atramentosa	Dry	37.1	Centre	Flat	42.4	Edge	West	33.4	Edge	Centre	37.7	9	5.3	-3.7	0.6	-5.3	3.7	-0.6
Marino Rocks	January 4	6	21	Yes	4:03pm	33	0	Lower	Nerita atramentosa	Dry	36.4	Centre	Flat	44.7	Edge	West	33.5	Flat	East	39.6	11.2	8.3	-2.9	3.2	-8.3	2.9	-3.2
Marino Rocks	January 4	6	4	Yes	3:23pm	33	0	Lower	Nerita atramentosa	Wet	33.4	Centre	Edge	42.9	Edge	West	32.3	Flat	East	37.6	10.6	9.5	-1.1	4.2	-9.5	1.1	-4.2
Marino Rocks	January 4	6	23	Yes	4:05pm	33	0	Lower	Nerita atramentosa	Wet	37.9	Centre	Flat	44	Edge	Centre	34.9	Flat	West	39.4	9.1	6.1	-3	1.5	-6.1	3	-1.5
Marino Rocks	January 4	6	24	Yes	4:07pm	33	0	Lower	Nerita atramentosa	Wet	32.6	Centre	Edge	34.5	Edge	Centre	31	Flat	Centre	32.6	3.5	1.9	-1.6	0	-1.9	1.6	0
Marino Rocks	January 4	6	25	Yes	4:08pm	33	0	Lower	Nerita atramentosa	Dry	39.9	West	Flat	43.4	Edge	Centre	34.3	Flat	West	39.9	9.1	3.5	-5.6	0	-3.5	5.6	0
Marino Rocks	January 4	6	26	Yes	4:08pm	33	0	Lower	Nerita atramentosa	Wet	35.5	Centre	Flat	44.7	Edge	West	31.1	Flat	Centre	36.9	13.6	9.2	-4.4	1.4	-9.2	4.4	-1.4
Marino Rocks	January 4	6	7	Yes	3:27pm	33	0	Lower	Nerita atramentosa	Dry	36.5	West	Flat	41.5	Edge	West	33.1	Flat	Centre	36.8	8.4	5	-3.4	0.3	-5	3.4	-0.3
Marino Rocks	January 4	6	8	Yes	3:28pm	33	0	Lower	Nerita atramentosa	Wet	30.8	West	Flat	39.7	Edge	Centre	28.8	Flat	Centre	33.5	10.9	8.9	-2	2.7	-8.9	2	-2.7
Marino Rocks	January 4	6	27	Yes	4:10pm	33	0	Lower	Nerita atramentosa	Wet	36.4	Centre	Flat	43.4	Edge	West	30.9	Edge	East	36.2	12.5	7	-5.5	-0.2	-7	5.5	0.2
Marino Rocks	January 4	6	28	Yes	4:10pm	33	0	Lower	Nerita atramentosa	Dry	39.2	Centre	Edge	44.1	Edge	West	34.8	Flat	East	40.2	9.3	4.9	-4.4	1	-4.9	4.4	-1
Marino Rocks	January 4	6	29	Yes	4:11pm	33	0	Lower	Nerita atramentosa	Wet	34	Centre	Peak	40.7	Edge	Centre	30.8	Peak	Centre	36.8	9.9	6.7	-3.2	2.8	-6.7	3.2	-2.8
Marino Rocks	January 4	6	30	Yes	4:12pm	33	0	Lower	Nerita atramentosa	Dry	34.6	East	Flat	42.3	Edge	West	33.4	Flat	East	38.1	8.9	7.7	-1.2	3.5	-7.7	1.2	-3.5
Marino Rocks	January 4	6	31	Yes	4:13pm	33	0	Lower	Nerita atramentosa	Wet	34.7	Centre	Edge	42.2	Edge	West	31.8	Flat	Centre	35.2	10.4	7.5	-2.9	0.5	-7.5	2.9	-0.5
Marino Rocks	January 4	6	32	Yes	4:18pm	33	0	Lower	Nerita atramentosa	Wet	35.4	East	Flat	43.2	Edge	West	33	Flat	Centre	37.4	10.2	7.8	-2.4	2	-7.8	2.4	-2
Marino Rocks	January 4	6	33	Yes	4:19pm	33	0	Lower	Nerita atramentosa	Wet	33.7	Centre	Flat	43.1	Edge	West	32.1	Flat	East	37	11	9.4	-1.6	3.3	-9.4	1.6	-3.3
Marino Rocks	January 4	6	35	Yes	4:23pm	33	0	Lower	Nerita atramentosa	Wet	34.4	Centre	Flat	37.5	Edge	East	31.5	Flat	West	34	6	3.1	-2.9	-0.4	-3.1	2.9	0.4
Marino Rocks	January 4	6	38	Yes	4:27pm	33	0	Lower	Nerita atramentosa	Wet	36.1	West	Depression	40.1	Depression	West	31.8	Flat	Centre	35.3	8.3	4	-4.3	-0.8	-4	4.3	0.8
Marino Rocks	January 4	6	40	Yes	4:32pm	33	0	Lower	Nerita atramentosa	Wet	35.8	West	Flat	43.3	Edge	Centre	34.5	Flat	West	39.3	8.8	7.5	-1.3	3.5	-7.5	1.3	-3.5
Marino Rocks	January 4	6	10	Yes	3:34pm	33	0	Lower	Diloma concamerata	Wet	34.1	Centre	Edge	37.5	Edge	West	29.6	Edge	East	33.6	7.9	3.4	-4.5	-0.5	-3.4	4.5	0.5
Marino Rocks	January 4	6	11	No	3:35pm	33	0	Lower	Diloma concamerata	Wet	36.4	Centre	Flat	47.1	Edge	West	34.4	Flat	Centre	38.6	12.7	10.7	-2	2.2	-10.7	2	-2.2
Marino Rocks	January 4	6	14	No	3:40pm	33	0	Lower	Diloma concamerata	Wet	33.8	East	Flat	38.6	Edge	East	29.4	Flat	West	32.4	9.2	4.8	-4.4	-1.4	-4.8	4.4	1.4
Marino Rocks	January 4	6	15	Yes	3:41pm	33	0	Lower	Diloma concamerata	Dry	37.8	Centre	Flat	42.4	Edge	Centre	33.4	Edge	West	38.6	9	4.6	-4.4	0.8	-4.6	4.4	-0.8
Marino Rocks	January 4	6	22	Yes	4:04pm	33	0	Lower	Diloma concamerata	Wet	32.4	West	Edge	38.6	Edge	West	30.3	Flat	West	33.4	8.3	6.2	-2.1	1	-6.2	2.1	-1
Marino Rocks	January 4	6	30	No	4:12pm	33	0	Lower	Diloma concamerata	Dry	35.9	East	Edge	38.1	Edge	West	33.4	Flat	East	38.1	4.7	2.2	-2.5	2.2	-2.2	2.5	-2.2
Marino Rocks	January 4	6	32	No	4:18pm	33	0	Lower	Diloma concamerata	Wet	35.5	Centre	Flat	43.2	Edge	West	33	Flat	Centre	37.4	10.2	7.7	-2.5	1.9	-7.7	2.5	-1.9
Marino Rocks	January 4	6	33	No	4:19pm	33	0	Lower	Diloma concamerata	Wet	34.7	Centre	Flat	43.1	Edge	West	32.1	Flat	East	37	11	8.4	-2.6	2.3	-8.4	2.6	-2.3
Marino Rocks	January 4	6	37	Yes	4:26pm	33	0	Lower	Diloma concamerata	Wet	36.8	East	Flat	41.3	Edge	West	33.8	Flat	Centre	36.2	7.5	4.5	-3	-0.6	-4.5	3	0.6
Marino Rocks	January 4	6	39	Yes	4:30pm	33	0	Lower	Diloma concamerata	Dry	37.2	Centre	Edge	41.3	Flat	Centre	33.2	Flat	East	38.4	8.1	4.1	-4	1.2	-4.1	4	-1.2
Marino Rocks	January 4	6	40	No	4:32pm	33	0	Lower	Diloma concamerata	Wet	35.2	West	Edge	43.3	Edge	Centre	34.3	Edge	West	39.3	9	8.1	-0.9	4.1	-8.1	0.9	-4.1
Marino Rocks	January 4	6	42	Yes	4:36pm	33	0	Lower	Diloma concamerata	Wet	32.2	East	Edge	40.9	Edge	East	31.4	Edge	West	35.8	9.5	8.7	-0.8	3.6	-8.7	0.8	-3.6
Marino Rocks	January 4	6	41	Yes	4:35pm	33	0	Lower	Diloma concamerata	Wet	37.3	Centre	Flat	42.8	Edge	West	32.4	Flat	Centre	35.4	10.4	5.5	-4.9	-1.9	-5.5	4.9	1.9
Marino Rocks	January 4	6	43	Yes	4:38pm	33	0	Lower	Diloma concamerata	Dry	37.2	Centre	Flat	44.7	Edge	West	35	Edge	East	38.9	9.7	7.5	-2.2	1.7	-7.5	2.2	-1.7
Marino Rocks	January 4	6	45	Yes	4:40pm	33	0	Lower	Diloma concamerata	Dry	37.5	Centre	Flat	42	Edge	West	36.5	Edge	Centre	38.5	5.5	4.5	-1	1	-4.5	1	-1
Marino Rocks	January 4	6	46	Yes	4:46pm	33	0	Lower	Diloma concamerata	Wet	34.9	West	Edge	41.4	Edge	Centre	32	Flat	West	35.3	9.4	6.5	-2.9	0.4	-6.5	2.9	-0.4
Marino Rocks	January 4	6	47	Yes	4:46pm	33	0	Lower	Diloma concamerata	Wet	31.2	Centre	Edge	39	Edge	Centre	29.9	Edge	Centre	32.9	9.1	7.8	-1.3	1.7	-7.8	1.3	-1.7
Marino Rocks	January 4	6	48	Yes	4:47pm	33	0	Lower	Diloma concamerata	Wet	33.6	Centre	Flat	39.3	Edge	Centre	29.4	Edge	Centre	33.5	9.9	5.7	-4.2	-0.1	-5.7	4.2	0.1
Marino Rocks	January 4	6	64	Yes	5:37pm	33	0	Upper	Diloma concamerata	Dry	41.1	East	Depression	46.2	Edge	West	39.7	Flat	Centre	42.4	6.5	5.1	-1.4	1.3	-5.1	1.4	-1.3
Marino Rocks	January 4	6	21	No	4:03pm	33	0	Lower	Bembicium nanum	Dry	39.1	Centre	Flat	39.6	Edge	West	33.8	Flat	East	39.6	5.8	0.5	-5.3	0.5	-0.5	5.3	-0.5
Marino Rocks	January 4	6	27	No	4:10pm	33	0	Lower	Bembicium nanum	Wet	37.6	Centre	Flat	43.4	Edge	West	31.8	Flat	Centre	36.2	11.6	5.8	-5.8	-1.4	-5.8	5.8	1.4
Marino Rocks	January 4	6	30	No	4:12pm	33	0	Lower	Bembicium nanum	Dry	35.6	East	Edge	42.3	Edge	West	33.4	Edge	East	38.1	8.9	6.7	-2.2	2.5	-6.7	2.2	-2.5
Marino Rocks	January 4	6	32	No	4:18pm	33	0	Lower	Bembicium nanum	Wet	39	East	Edge	43.2	Edge	West	33	Flat	Centre	37.4	10.2	4.2	-6	-1.6	-4.2	6	1.6
Marino Rocks	January 4	6	34	Yes	4:21pm	33	0	Lower	Bembicium nanum	Dry	39.2	Centre	Flat	46.9	Edge	West	38	Flat	Centre	41.2	8.9	7.7	-1.2	2	-7.7	1.2	-2
Marino Rocks	January 4	6	36	Yes	4:24pm	33	0	Lower	Bembicium nanum	Dry	42.4	Centre	Flat	45.8	Edge	West	40.4	Flat	Centre	42.4	5.4	3.4	-2	0	-3.4	2	0
Marino Rocks	January 4	6	44	Yes	4:39pm	33	0	Lower	Bembicium nanum	Dry	37.1	West	Edge	41	Flat	Centre	34.1	Edge	East	38.1	6.9	3.9	-3	1	-3.9	3	-1
Marino Rocks	January 4	6	49	Yes	4:52pm	33	0	Lower	Bembicium nanum	Dry	37.1	Centre	Depression	43.9	Edge	West	31.6	Peak	Centre	37.1	12.3	6.8	-5.5	0	-6.8	5.5	0
Marino Rocks	January 4	6	50	Yes	4:53pm	33	0	Lower	Bembicium nanum	Dry	37.3	East	Edge	44.4	Edge	West	32.6	Flat	Centre	38.2	11.8	7.1	-4.7	0.9	-7.1	4.7	-0.9
Marino Rocks	January 4	6	51	Yes	4:54pm	33	0	Lower	Bembicium nanum	Wet	35.4	Centre	Flat	41.9	Edge	West	30.4	Edge	East	35.8	11.5	6.5	-5	0.4	-6.5	5	-0.4
Marino Rocks	January 4	6	52	Yes	4:55pm	33	0	Lower	Bembicium nanum	Wet	38	West	Edge	41.8	Edge	West	32.2	Edge	East	34.7	9.6	3.8	-5.8	-3.3	-3.8	5.8	3.3
Marino Rocks	January 4	6	53	Yes	4:56pm	33	0	Lower	Bembicium nanum	Dry	41.8	Centre	Flat	44.8	Edge	West	33.9	Edge	East	39	10.9	3	-7.9	-2.8	-3	7.9	2.8
Marino Rocks	January 4	6	54	Yes	5:14pm	33	0	Upper	Bembicium nanum	Dry	42.3	Centre	Flat	47.7	Edge	West	39	Edge	East	42.4	8.7	5.4	-3.3	0.1	-5.4	3.3	-0.1
Marino Rocks	January 4	6	55	Yes	5:16pm	33	0	Upper	Bembicium nanum	Dry	39.4	East	Flat	47	Edge	West	32	Edge	East	41.6	15	7.6	-7.4	2.2	-7.6	7.4	-2.2
Marino Rocks	January 4	6	56	Yes	5:17pm	33	0	Upper	Bembicium nanum	Dry	38.3	East	Flat	46	Flat	West	36.8	Edge	East	41.3	9.2	7.7	-1.5	3	-7.7	1.5	-3
Marino Rocks	January 4	6	57	Yes	5:22pm	33	0	Upper	Bembicium nanum	Dry	36.9	East	Flat	38.9	Edge	East	33.9	Flat	West	35.4	5	2	-3	-1.5	-2	3	1.5
Marino Rocks	January 4	6	58	Yes	5:23pm	33	0	Upper	Bembicium nanum	Dry	37.9	East	Flat	47.4	Edge	West	37.1	Edge	East	42.5	10.3	9.5	-0.8	4.6	-9.5	0.8	-4.6
Marino Rocks	January 4	6	5	Yes	3:25pm	33	0	Lower	Bembicium nanum	Dry	40.9	Centre	Flat	44.2	Edge	West	38.4	Flat	Centre	40.8	5.8	3.3	-2.5	-0.1	-3.3	2.5	0.1
Marino Rocks	January 4	6	6	Yes	3:26pm	33	0	Lower	Bembicium nanum	Wet	41.3	Centre	Edge	43.4	Depression	Centre	33.7	Edge	West	37.6	9.7	2.1	-7.6	-3.7	-2.1	7.6	3.7
Marino Rocks	January 4	6	59	Yes	5:26pm	33	0	Upper	Bembicium nanum	Dry	42.4	Centre	Flat	45.9	Edge	West	39	Flat	Centre	41.9	6.9	3.5	-3.4	-0.5	-3.5	3.4	0.5
Marino Rocks	January 4	6	60	Yes	5:29pm	33	0	Upper	Bembicium nanum	Dry	37.3	East	Flat	41.1	Flat	West	35.5	Flat	East	37.9	5.6	3.8	-1.8	0.6	-3.8	1.8	-0.6
Marino Rocks	January 4	6	61	Yes	5:31pm	33	0	Upper	Bembicium nanum	Dry	44.3	West	Flat	45.7	Edge	West	36.8	Flat	East	40.4	8.9	1.4	-7.5	-3.9	-1.4	7.5	3.9
Marino Rocks	January 4	6	62	Yes	5:32pm	33	0	Upper	Bembicium nanum	Dry	42.8	Centre	Edge	46.6	Edge	West	39.7	Edge	East	43.3	6.9	3.8	-3.1	0.5	-3.8	3.1	-0.5
Marino Rocks	January 4	6	63	Yes	5:34pm	33	0	Upper	Bembicium nanum	Dry	41.7	East	Edge	47.5	Edge	Centre	38.4	Edge	East	42.7	9.1	5.8	-3.3	1	-5.8	3.3	-1
Marino Rocks	January 4	6	64	No	5:37pm	33	0	Upper	Bembicium nanum	Dry	40.3	East	Flat	46.2	Edge	West	39.7	Flat	Centre	42.4	6.5	5.9	-0.6	2.1	-5.9	0.6	-2.1
Marino Rocks	January 4	6	65	Yes	5:38pm	33	0	Upper	Bembicium nanum	Dry	40	East	Flat	47	Edge	West	37.7	Flat	East	41.6	9.3	7	-2.3	1.6	-7	2.3	-1.6
Marino Rocks	January 4	6	66	Yes	5:39pm	33	0	Upper	Bembicium nanum	Dry	41.8	Centre	Flat	46.8	Edge	East	38.2	Flat	East	42	8.6	5	-3.6	0.2	-5	3.6	-0.2
Marino Rocks	January 4	6	67	Yes	5:41pm	33	0	Upper	Bembicium nanum	Dry	42.7	Centre	Flat	48.2	Edge	West	39.3	Edge	East	43.2	8.9	5.5	-3.4	0.5	-5.5	3.4	-0.5
Marino Rocks	January 4	6	68	Yes	5:43pm	33	0	Upper	Bembicium nanum	Dry	40	Centre	Flat	46.6	Edge	West	37.8	Flat	East	41	8.8	6.6	-2.2	1	-6.6	2.2	-1
Marino Rocks	January 4	6	69	Yes	5:44pm	33	0	Upper	Bembicium nanum	Dry	39.3	West	Flat	45.7	Edge	East	36.3	Flat	East	40	9.4	6.4	-3	0.7	-6.4	3	-0.7
Marino Rocks	January 5	7	1	Yes	3:05pm	35	0	Lower	Nerita atramentosa	Wet	32.5	East	Depression	40.3	Edge	West	30.6	Flat	Centre	34.4	9.7	7.8	-1.9	1.9	-7.8	1.9	-1.9
Marino Rocks	January 5	7	2	Yes	3:09pm	35	0	Lower	Nerita atramentosa	Wet	31	Centre	Edge	46.6	Edge	West	30.9	Flat	Centre	39.5	15.7	15.6	-0.1	8.5	-15.6	0.1	-8.5
Marino Rocks	January 5	7	3	Yes	3:10pm	35	0	Lower	Nerita atramentosa	Wet	32.9	Centre	Peak	38.1	Edge	West	32.4	Peak	Centre	34.8	5.7	5.2	-0.5	1.9	-5.2	0.5	-1.9
Marino Rocks	January 5	7	5	Yes	3:14pm	35	0	Lower	Nerita atramentosa	Dry	41	Centre	Flat	47.7	Edge	Centre	39.9	Edge	West	42.5	7.8	6.7	-1.1	1.5	-6.7	1.1	-1.5
Marino Rocks	January 5	7	7	Yes	3:16pm	35	0	Lower	Nerita atramentosa	Wet	37.8	Centre	Flat	43.7	Edge	West	35.9	Flat	Centre	39.4	7.8	5.9	-1.9	1.6	-5.9	1.9	-1.6
Marino Rocks	January 5	7	9	Yes	3:20pm	35	0	Lower	Nerita atramentosa	Wet	36.4	West	Flat	41.1	Edge	West	31.4	Flat	East	35.6	9.7	4.7	-5	-0.8	-4.7	5	0.8
Marino Rocks	January 5	7	10	Yes	3:21pm	35	0	Lower	Nerita atramentosa	Wet	38.7	Centre	Flat	47	Edge	West	34.9	Flat	Centre	39.3	12.1	8.3	-3.8	0.6	-8.3	3.8	-0.6
Marino Rocks	January 5	7	11	Yes	3:24pm	35	0	Lower	Nerita atramentosa	Wet	34.2	Centre	Edge	41.2	Edge	West	32.8	Flat	Centre	35.6	8.4	7	-1.4	1.4	-7	1.4	-1.4
Marino Rocks	January 5	7	12	Yes	3:25pm	35	0	Lower	Nerita atramentosa	Wet	30.9	West	Edge	43.6	Edge	East	30.4	Edge	West	35.2	13.2	12.7	-0.5	4.3	-12.7	0.5	-4.3
Marino Rocks	January 5	7	15	Yes	3:30pm	35	0	Lower	Nerita atramentosa	Dry	42.8	West	Flat	47.1	Edge	West	41.3	Flat	East	42.8	5.8	4.3	-1.5	0	-4.3	1.5	0
Marino Rocks	January 5	7	16	Yes	3:30pm	35	0	Lower	Nerita atramentosa	Wet	35.6	West	Edge	43.3	Edge	Centre	33.1	Peak	Centre	37	10.2	7.7	-2.5	1.4	-7.7	2.5	-1.4
Marino Rocks	January 5	7	18	Yes	3:34pm	35	0	Lower	Nerita atramentosa	Dry	43.5	East	Flat	47.4	Edge	Centre	42.7	Flat	East	44.2	4.7	3.9	-0.8	0.7	-3.9	0.8	-0.7
Marino Rocks	January 5	7	19	Yes	3:36pm	35	0	Lower	Nerita atramentosa	Dry	38.5	East	Flat	46	Edge	West	37.6	Flat	East	41.9	8.4	7.5	-0.9	3.4	-7.5	0.9	-3.4
Marino Rocks	January 5	7	21	Yes	3:54pm	35	0	Lower	Nerita atramentosa	Wet	35.2	Centre	Peak	42.1	Edge	Centre	30.7	Flat	Centre	35.6	11.4	6.9	-4.5	0.4	-6.9	4.5	-0.4
Marino Rocks	January 5	7	23	Yes	3:56pm	35	0	Lower	Nerita atramentosa	Wet	34.1	East	Edge	41.7	Edge	West	31.4	Flat	Centre	34.6	10.3	7.6	-2.7	0.5	-7.6	2.7	-0.5
Marino Rocks	January 5	7	24	Yes	3:58pm	34	0	Lower	Nerita atramentosa	Wet	32.8	Centre	Edge	45.1	Edge	West	31.2	Flat	East	36.8	13.9	12.3	-1.6	4	-12.3	1.6	-4
Marino Rocks	January 5	7	25	Yes	3:58pm	34	0	Lower	Nerita atramentosa	Wet	33.1	West	Edge	42	Edge	Centre	29.7	Flat	West	36	12.3	8.9	-3.4	2.9	-8.9	3.4	-2.9
Marino Rocks	January 5	7	29	Yes	4:05pm	34	0	Lower	Nerita atramentosa	Dry	38	Centre	Flat	42.3	Edge	West	36.4	Flat	East	39	5.9	4.3	-1.6	1	-4.3	1.6	-1
Marino Rocks	January 5	7	31	Yes	4:08pm	34	0	Lower	Nerita atramentosa	Wet	35	Centre	Flat	42.4	Edge	Centre	33.7	Flat	Centre	37.9	8.7	7.4	-1.3	2.9	-7.4	1.3	-2.9
Marino Rocks	January 5	7	32	Yes	4:09pm	34	0	Lower	Nerita atramentosa	Dry	46.3	West	Flat	50.8	Edge	West	42.2	Flat	East	45.5	8.6	4.5	-4.1	-0.8	-4.5	4.1	0.8
Marino Rocks	January 5	7	33	Yes	4:11pm	34	0	Lower	Nerita atramentosa	Wet	33.4	East	Edge	35.7	Edge	Centre	30.5	Flat	West	32.3	5.2	2.3	-2.9	-1.1	-2.3	2.9	1.1
Marino Rocks	January 5	7	34	Yes	4:12pm	34	0	Lower	Nerita atramentosa	Dry	41	West	Flat	45.3	Edge	West	35.8	Flat	East	39.4	9.5	4.3	-5.2	-1.6	-4.3	5.2	1.6
Marino Rocks	January 5	7	35	Yes	4:14pm	34	0	Lower	Nerita atramentosa	Wet	36.8	Centre	Flat	42	Edge	West	35.2	Flat	Centre	38.6	6.8	5.2	-1.6	1.8	-5.2	1.6	-1.8
Marino Rocks	January 5	7	38	Yes	4:21pm	34	0	Lower	Nerita atramentosa	Dry	37.5	East	Peak	48.3	Edge	West	37.5	Peak	East	43.6	10.8	10.8	0	6.1	-10.8	0	-6.1
Marino Rocks	January 5	7	39	Yes	4:22pm	34	0	Lower	Nerita atramentosa	Wet	35.2	Centre	Flat	40.2	Edge	West	33.7	Depression	Centre	35.9	6.5	5	-1.5	0.7	-5	1.5	-0.7
Marino Rocks	January 5	7	40	Yes	4:24pm	34	0	Lower	Nerita atramentosa	Wet	40.1	West	Flat	43.2	Edge	West	29.8	Edge	Centre	34.7	13.4	3.1	-10.3	-5.4	-3.1	10.3	5.4
Marino Rocks	January 5	7	41	Yes	4:25pm	34	0	Lower	Nerita atramentosa	Wet	36.7	West	Flat	39.5	Edge	West	31.9	Flat	East	35.3	7.6	2.8	-4.8	-1.4	-2.8	4.8	1.4
Marino Rocks	January 5	7	42	Yes	4:26pm	34	0	Lower	Nerita atramentosa	Wet	37.6	East	Flat	43.9	Edge	West	32.4	Flat	West	37.1	11.5	6.3	-5.2	-0.5	-6.3	5.2	0.5
Marino Rocks	January 5	7	43	Yes	4:28pm	34	0	Lower	Nerita atramentosa	Wet	34.8	Centre	Flat	45.3	Flat	East	33.7	Flat	East	39	11.6	10.5	-1.1	4.2	-10.5	1.1	-4.2
Marino Rocks	January 5	7	44	Yes	4:30pm	34	0	Lower	Nerita atramentosa	Wet	40.5	Centre	Drop	47.1	Edge	Centre	35.8	Flat	Centre	41.5	11.3	6.6	-4.7	1	-6.6	4.7	-1
Marino Rocks	January 5	7	2	No	3:09pm	35	0	Lower	Diloma concamerata	Wet	32.9	West	Edge	46.6	Edge	West	30.9	Flat	Centre	39.5	15.7	13.7	-2	6.6	-13.7	2	-6.6
Marino Rocks	January 5	7	4	Yes	3:12pm	35	0	Lower	Diloma concamerata	Wet	39	Centre	Flat	47.2	Edge	West	34.2	Flat	Centre	40	13	8.2	-4.8	1	-8.2	4.8	-1
Marino Rocks	January 5	7	6	Yes	3:15pm	35	0	Lower	Diloma concamerata	Wet	36.5	West	Edge	39.6	Edge	Centre	31.7	Flat	Centre	33.8	7.9	3.1	-4.8	-2.7	-3.1	4.8	2.7
Marino Rocks	January 5	7	8	Yes	3:18pm	35	0	Lower	Diloma concamerata	Dry	38.7	Centre	Flat	40.5	Edge	West	33.3	Flat	Centre	37.3	7.2	1.8	-5.4	-1.4	-1.8	5.4	1.4
Marino Rocks	January 5	7	10	No	3:21pm	35	0	Lower	Diloma concamerata	Wet	35.3	Centre	Flat	47	Edge	West	34.9	Flat	Centre	39.3	12.1	11.7	-0.4	4	-11.7	0.4	-4
Marino Rocks	January 5	7	12	No	3:25pm	35	0	Lower	Diloma concamerata	Wet	37.1	East	Flat	43.6	Edge	East	30.4	Flat	West	35.2	13.2	6.5	-6.7	-1.9	-6.5	6.7	1.9
Marino Rocks	January 5	7	13	Yes	3:27pm	35	0	Lower	Diloma concamerata	Wet	34.7	Centre	Flat	42.2	Edge	East	32.3	Edge	West	37.1	9.9	7.5	-2.4	2.4	-7.5	2.4	-2.4
Marino Rocks	January 5	7	14	Yes	3:28pm	35	0	Lower	Diloma concamerata	Wet	39.1	Centre	Flat	44	Edge	Centre	35.4	Depression	Centre	39.7	8.6	4.9	-3.7	0.6	-4.9	3.7	-0.6
Marino Rocks	January 5	7	19	No	3:36pm	35	0	Lower	Diloma concamerata	Dry	38.1	Centre	Flat	46	Edge	West	37.8	Flat	East	41.9	8.2	7.9	-0.3	3.8	-7.9	0.3	-3.8
Marino Rocks	January 5	7	20	Yes	3:37pm	35	0	Lower	Diloma concamerata	Dry	40.8	East	Flat	42.4	Flat	West	38.3	Flat	East	42.4	4.1	1.6	-2.5	1.6	-1.6	2.5	-1.6
Marino Rocks	January 5	7	22	Yes	3:55pm	35	0	Lower	Diloma concamerata	Wet	32.6	Centre	Flat	47.9	Edge	West	30.7	Flat	East	39.3	17.2	15.3	-1.9	6.7	-15.3	1.9	-6.7
Marino Rocks	January 5	7	24	No	3:58pm	34	0	Lower	Diloma concamerata	Wet	34.4	Centre	Flat	45.1	Edge	West	31.6	Flat	East	36.8	13.5	10.7	-2.8	2.4	-10.7	2.8	-2.4
Marino Rocks	January 5	7	30	Yes	4:06pm	34	0	Lower	Diloma concamerata	Wet	35.3	East	Flat	42.2	Edge	West	32.8	Flat	East	36.4	9.4	6.9	-2.5	1.1	-6.9	2.5	-1.1
Marino Rocks	January 5	7	31	No	4:08pm	34	0	Lower	Diloma concamerata	Wet	36.6	Centre	Flat	42.4	Edge	Centre	33.6	Flat	Centre	37.9	8.8	5.8	-3	1.3	-5.8	3	-1.3
Marino Rocks	January 5	7	33	No	4:11pm	34	0	Lower	Diloma concamerata	Wet	32	Centre	Flat	35.7	Edge	East	30.6	Flat	Centre	32.3	5.1	3.7	-1.4	0.3	-3.7	1.4	-0.3
Marino Rocks	January 5	7	35	No	4:14pm	34	0	Lower	Diloma concamerata	Wet	36.1	Centre	Flat	42.8	Edge	West	35	Flat	Centre	38.6	7.8	6.7	-1.1	2.5	-6.7	1.1	-2.5
Marino Rocks	January 5	7	39	No	4:22pm	34	0	Lower	Diloma concamerata	Wet	36.8	Centre	Edge	40.2	Edge	West	33.7	Depression	Centre	35.9	6.5	3.4	-3.1	-0.9	-3.4	3.1	0.9
Marino Rocks	January 5	7	43	No	4:28pm	34	0	Lower	Diloma concamerata	Wet	34.6	East	Flat	46.3	Edge	West	33.7	Edge	East	39	12.6	11.7	-0.9	4.4	-11.7	0.9	-4.4
Marino Rocks	January 5	7	45	Yes	4:32pm	34	0	Lower	Diloma concamerata	Wet	36.3	Centre	Flat	45.8	Edge	West	34.3	Edge	East	39.9	11.5	9.5	-2	3.6	-9.5	2	-3.6
Marino Rocks	January 5	7	46	Yes	4:38pm	34	0	Lower	Diloma concamerata	Wet	34.2	East	Flat	37.9	Edge	West	29.9	Flat	Centre	33.2	8	3.7	-4.3	-1	-3.7	4.3	1
Marino Rocks	January 5	7	47	Yes	4:40pm	34	0	Lower	Diloma concamerata	Wet	38.7	Centre	Flat	40.3	Edge	West	36.5	Flat	Centre	40.3	3.8	1.6	-2.2	1.6	-1.6	2.2	-1.6
Marino Rocks	January 5	7	49	Yes	4:47pm	34	0	Lower	Diloma concamerata	Wet	33.3	East	Flat	40.8	Flat	Centre	32.8	Flat	East	36.2	8	7.5	-0.5	2.9	-7.5	0.5	-2.9
Marino Rocks	January 5	7	50	Yes	4:48pm	34	0	Lower	Diloma concamerata	Wet	35.3	Centre	Flat	41.7	Edge	West	33.6	Flat	Centre	36	8.1	6.4	-1.7	0.7	-6.4	1.7	-0.7
Marino Rocks	January 5	7	51	Yes	4:49pm	34	0	Lower	Diloma concamerata	Wet	35.3	West	Edge	40.8	Edge	West	31.9	Flat	East	35.4	8.9	5.5	-3.4	0.1	-5.5	3.4	-0.1
Marino Rocks	January 5	7	52	Yes	4:50pm	34	0	Lower	Diloma concamerata	Wet	34.8	West	Edge	44.4	Edge	Centre	30.2	Edge	Centre	36.3	14.2	9.6	-4.6	1.5	-9.6	4.6	-1.5
Marino Rocks	January 5	7	53	Yes	4:51pm	34	0	Lower	Diloma concamerata	Wet	31.4	Centre	Flat	44.6	Edge	West	29.2	Flat	Centre	35.5	15.4	13.2	-2.2	4.1	-13.2	2.2	-4.1
Marino Rocks	January 5	7	54	Yes	4:53pm	34	0	Lower	Diloma concamerata	Wet	30.3	West	Edge	33.6	Edge	Centre	29.2	Flat	Centre	30.7	4.4	3.3	-1.1	0.4	-3.3	1.1	-0.4
Marino Rocks	January 5	7	55	Yes	4:56pm	34	0	Lower	Diloma concamerata	Wet	34.7	Centre	Flat	45.4	Flat	Centre	32.7	Flat	West	37.8	12.7	10.7	-2	3.1	-10.7	2	-3.1
Marino Rocks	January 5	7	15	No	3:30pm	35	0	Lower	Bembicium nanum	Dry	45.2	West	Edge	47.1	Edge	West	41.4	Flat	East	42.8	5.7	1.9	-3.8	-2.4	-1.9	3.8	2.4
Marino Rocks	January 5	7	17	Yes	3:32pm	35	0	Lower	Bembicium nanum	Dry	45.3	East	Edge	48.3	Edge	West	44.2	Flat	East	46.1	4.1	3	-1.1	0.8	-3	1.1	-0.8
Marino Rocks	January 5	7	26	Yes	4:02pm	34	0	Lower	Bembicium nanum	Dry	46.2	Centre	Edge	46.3	Edge	Centre	37.4	Flat	Centre	41.8	8.9	0.1	-8.8	-4.4	-0.1	8.8	4.4
Marino Rocks	January 5	7	27	Yes	4:03pm	34	0	Lower	Bembicium nanum	Dry	44.7	East	Flat	48.7	Edge	West	40.4	Flat	Centre	43.8	8.3	4	-4.3	-0.9	-4	4.3	0.9
Marino Rocks	January 5	7	28	Yes	4:04pm	34	0	Lower	Bembicium nanum	Dry	39.5	East	Flat	45.4	Edge	West	36.4	Flat	East	40.5	9	5.9	-3.1	1	-5.9	3.1	-1
Marino Rocks	January 5	7	30	No	4:06pm	34	0	Lower	Bembicium nanum	Wet	34.2	East	Depression	42.2	Edge	West	32.9	Flat	Centre	36.4	9.3	8	-1.3	2.2	-8	1.3	-2.2
Marino Rocks	January 5	7	32	No	4:09pm	34	0	Lower	Bembicium nanum	Dry	44.8	Centre	Flat	50.8	Flat	West	42.1	Edge	East	45.5	8.7	6	-2.7	0.7	-6	2.7	-0.7
Marino Rocks	January 5	7	36	Yes	4:15pm	34	0	Lower	Bembicium nanum	Dry	41.1	Centre	Edge	46	Edge	West	35.6	Flat	East	39.1	10.4	4.9	-5.5	-2	-4.9	5.5	2
Marino Rocks	January 5	7	37	Yes	4:18pm	34	0	Lower	Bembicium nanum	Dry	48.8	East	Edge	51.8	Edge	West	45.1	Flat	West	47.7	6.7	3	-3.7	-1.1	-3	3.7	1.1
Marino Rocks	January 5	7	38	No	4:21pm	34	0	Lower	Bembicium nanum	Dry	41	East	Edge	48.3	Edge	West	37.5	Flat	East	43.6	10.8	7.3	-3.5	2.6	-7.3	3.5	-2.6
Marino Rocks	January 5	7	48	Yes	4:44pm	34	0	Lower	Bembicium nanum	Dry	43.5	Centre	Flat	50.7	Edge	West	39.4	Edge	East	44.3	11.3	7.2	-4.1	0.8	-7.2	4.1	-0.8
Marino Rocks	January 5	7	55	No	4:56pm	34	0	Lower	Bembicium nanum	Wet	41.8	Centre	Flat	45.4	Flat	Centre	32.7	Flat	East	37.8	12.7	3.6	-9.1	-4	-3.6	9.1	4
Marino Rocks	January 5	7	56	Yes	5:07pm	34	0	Upper	Bembicium nanum	Dry	36.4	East	Flat	44.8	Flat	West	28.8	Flat	West	37.5	16	8.4	-7.6	1.1	-8.4	7.6	-1.1
Marino Rocks	January 5	7	57	Yes	5:11pm	34	0	Upper	Bembicium nanum	Dry	39.9	East	Flat	48.5	Flat	West	38.9	Flat	East	43.1	9.6	8.6	-1	3.2	-8.6	1	-3.2
Marino Rocks	January 5	7	58	Yes	5:12pm	34	0	Upper	Bembicium nanum	Dry	48.3	Centre	Flat	52.3	Edge	West	46.1	Flat	Centre	49	6.2	4	-2.2	0.7	-4	2.2	-0.7
Marino Rocks	January 5	7	59	Yes	5:13pm	34	0	Upper	Bembicium nanum	Dry	45.8	Centre	Flat	49.6	Flat	West	40.5	Edge	East	45.1	9.1	3.8	-5.3	-0.7	-3.8	5.3	0.7
Marino Rocks	January 5	7	60	Yes	5:14pm	34	0	Upper	Bembicium nanum	Dry	44.3	Centre	Flat	48.1	Edge	West	42.3	Flat	East	44.5	5.8	3.8	-2	0.2	-3.8	2	-0.2
Marino Rocks	January 5	7	61	Yes	5:15pm	34	0	Upper	Bembicium nanum	Dry	41.5	East	Flat	48	Flat	Centre	40.9	Flat	East	44	7.1	6.5	-0.6	2.5	-6.5	0.6	-2.5
Marino Rocks	January 5	7	62	Yes	5:16pm	34	0	Upper	Bembicium nanum	Dry	43.1	Centre	Flat	50	Flat	West	41.4	Flat	East	44.7	8.6	6.9	-1.7	1.6	-6.9	1.7	-1.6
Marino Rocks	January 5	7	63	Yes	5:17pm	34	0	Upper	Bembicium nanum	Dry	43	Centre	Flat	49.7	Flat	West	41.4	Flat	East	44.2	8.3	6.7	-1.6	1.2	-6.7	1.6	-1.2
Marino Rocks	January 5	7	64	Yes	5:22pm	34	0	Upper	Bembicium nanum	Dry	48.1	Centre	Depression	50.2	Peak	Centre	42.5	Edge	Centre	47.3	7.7	2.1	-5.6	-0.8	-2.1	5.6	0.8
Marino Rocks	January 5	7	65	Yes	5:26pm	34	0	Upper	Bembicium nanum	Dry	40.1	West	Drop	41.7	Flat	Centre	37	Flat	Centre	38.7	4.7	1.6	-3.1	-1.4	-1.6	3.1	1.4
Marino Rocks	January 5	7	66	Yes	5:27pm	34	0	Upper	Bembicium nanum	Dry	46.8	East	Flat	49.9	Depression	Centre	43.8	Edge	Centre	45.9	6.1	3.1	-3	-0.9	-3.1	3	0.9
Marino Rocks	January 5	7	67	Yes	5:29pm	34	0	Upper	Bembicium nanum	Wet	38.5	East	Flat	43.5	Edge	Centre	32.6	Flat	Centre	36.1	10.9	5	-5.9	-2.4	-5	5.9	2.4
Marino Rocks	January 5	7	68	Yes	5:30pm	34	0	Upper	Bembicium nanum	Dry	42.5	East	Edge	47.6	Edge	West	40.7	Edge	West	43.7	6.9	5.1	-1.8	1.2	-5.1	1.8	-1.2
Marino Rocks	January 5	7	69	Yes	5:31pm	34	0	Upper	Bembicium nanum	Dry	44.1	East	Edge	51.2	Edge	Centre	42.1	Edge	East	46.2	9.1	7.1	-2	2.1	-7.1	2	-2.1
Marino Rocks	January 5	7	70	Yes	5:32pm	34	0	Upper	Bembicium nanum	Dry	42.9	Centre	Flat	45.3	Edge	East	32.1	Depression	West	37.7	13.2	2.4	-10.8	-5.2	-2.4	10.8	5.2
Marino Rocks	January 5	7	71	Yes	5:35pm	34	0	Upper	Bembicium nanum	Dry	49	West	Flat	50.7	Edge	West	41.6	Edge	East	46.7	9.1	1.7	-7.4	-2.3	-1.7	7.4	2.3
Marino Rocks	January 5	7	72	Yes	5:36pm	34	0	Upper	Bembicium nanum	Dry	43.1	East	Depression	50.4	Flat	Centre	31.9	Edge	East	42.2	18.5	7.3	-11.2	-0.9	-7.3	11.2	0.9
Marino Rocks	January 5	7	73	Yes	5:37pm	34	0	Upper	Bembicium nanum	Dry	45.7	Centre	Flat	51.9	Edge	West	42	Edge	East	47.1	9.9	6.2	-3.7	1.4	-6.2	3.7	-1.4
OSullivan Beach	January 6	8	2	Yes	3:21pm	40	0	Lower	Nerita atramentosa	Dry	35.9	Centre	Flat	39.8	Edge	West	31.8	Flat	Centre	35.8	8	3.9	-4.1	-0.1	-3.9	4.1	0.1
OSullivan Beach	January 6	8	3	Yes	3:22pm	40	0	Lower	Nerita atramentosa	Wet	33.8	Centre	Flat	38.7	Edge	West	30.5	Peak	East	33.9	8.2	4.9	-3.3	0.1	-4.9	3.3	-0.1
OSullivan Beach	January 6	8	4	Yes	3:24pm	40	0	Lower	Nerita atramentosa	Wet	39.4	West	Flat	41.9	Depression	West	33.2	Edge	East	36.4	8.7	2.5	-6.2	-3	-2.5	6.2	3
OSullivan Beach	January 6	8	6	Yes	3:27pm	40	0	Lower	Nerita atramentosa	Wet	32.3	Centre	Edge	40.9	Edge	East	30.5	Flat	East	34.2	10.4	8.6	-1.8	1.9	-8.6	1.8	-1.9
OSullivan Beach	January 6	8	7	Yes	3:28pm	40	0	Lower	Nerita atramentosa	Dry	35.6	Centre	Drop	41.6	Edge	West	30.7	Edge	Centre	37.2	10.9	6	-4.9	1.6	-6	4.9	-1.6
OSullivan Beach	January 6	8	8	Yes	3:29pm	40	0	Lower	Nerita atramentosa	Wet	33.8	East	Drop	37.8	Edge	West	31.6	Flat	Centre	33.8	6.2	4	-2.2	0	-4	2.2	0
OSullivan Beach	January 6	8	10	Yes	3:33pm	40	0	Lower	Nerita atramentosa	Wet	33.3	East	Edge	41.3	Edge	West	31	Peak	East	34.9	10.3	8	-2.3	1.6	-8	2.3	-1.6
OSullivan Beach	January 6	8	11	Yes	3:35pm	40	0	Lower	Nerita atramentosa	Wet	37	Centre	Flat	39.1	Edge	West	32.5	Flat	Centre	36	6.6	2.1	-4.5	-1	-2.1	4.5	1
OSullivan Beach	January 6	8	12	Yes	3:36pm	40	0	Lower	Nerita atramentosa	Dry	39.6	East	Edge	45.5	Edge	Centre	37.6	Flat	East	41.3	7.9	5.9	-2	1.7	-5.9	2	-1.7
OSullivan Beach	January 6	8	14	Yes	3:40pm	40	0	Lower	Nerita atramentosa	Wet	32.8	Centre	Edge	35.9	Flat	West	30.2	Flat	Centre	32.8	5.7	3.1	-2.6	0	-3.1	2.6	0
OSullivan Beach	January 6	8	15	Yes	3:43pm	40	0	Lower	Nerita atramentosa	Dry	36.5	West	Flat	40.7	Edge	West	32.8	Flat	East	36.6	7.9	4.2	-3.7	0.1	-4.2	3.7	-0.1
OSullivan Beach	January 6	8	16	Yes	3:44pm	40	0	Lower	Nerita atramentosa	Wet	34.9	Centre	Flat	41.4	Flat	East	32.8	Flat	Centre	36	8.6	6.5	-2.1	1.1	-6.5	2.1	-1.1
OSullivan Beach	January 6	8	17	Yes	3:47pm	40	0	Lower	Nerita atramentosa	Dry	37.1	East	Edge	40.9	Depression	West	34.1	Flat	Centre	37.2	6.8	3.8	-3	0.1	-3.8	3	-0.1
OSullivan Beach	January 6	8	18	Yes	3:51pm	40	0	Lower	Nerita atramentosa	Dry	33.7	East	Flat	39.5	Depression	West	28.8	Flat	Centre	32.8	10.7	5.8	-4.9	-0.9	-5.8	4.9	0.9
OSullivan Beach	January 6	8	19	Yes	3:52pm	40	0	Lower	Nerita atramentosa	Dry	35.2	Centre	Flat	42	Edge	Centre	33.2	Flat	Centre	36.7	8.8	6.8	-2	1.5	-6.8	2	-1.5
OSullivan Beach	January 6	8	20	Yes	3:54pm	40	0	Lower	Nerita atramentosa	Dry	35.1	Centre	Flat	41.3	Edge	West	32.3	Flat	East	36.3	9	6.2	-2.8	1.2	-6.2	2.8	-1.2
OSullivan Beach	January 6	8	22	Yes	3:57pm	40	0	Lower	Nerita atramentosa	Dry	33.6	Centre	Flat	41.8	Edge	West	32.9	Flat	East	37.8	8.9	8.2	-0.7	4.2	-8.2	0.7	-4.2
OSullivan Beach	January 6	8	23	Yes	3:59pm	40	0	Lower	Nerita atramentosa	Dry	33	Centre	Flat	37.1	Depression	East	28.1	Flat	Centre	33	9	4.1	-4.9	0	-4.1	4.9	0
OSullivan Beach	January 6	8	24	Yes	4:00pm	40	0	Lower	Nerita atramentosa	Dry	34.2	West	Flat	39	Flat	Centre	28.7	Depression	Centre	34.3	10.3	4.8	-5.5	0.1	-4.8	5.5	-0.1
OSullivan Beach	January 6	8	25	Yes	4:03pm	40	0	Lower	Nerita atramentosa	Dry	34.3	East	Flat	38.1	Edge	West	28.7	Peak	Centre	33.6	9.4	3.8	-5.6	-0.7	-3.8	5.6	0.7
OSullivan Beach	January 6	8	28	Yes	4:06pm	40	0	Lower	Nerita atramentosa	Dry	36.8	Centre	Flat	42.4	Edge	West	35.3	Depression	West	38	7.1	5.6	-1.5	1.2	-5.6	1.5	-1.2
OSullivan Beach	January 6	8	29	Yes	4:07pm	40	0	Lower	Nerita atramentosa	Dry	36	Centre	Flat	42.1	Flat	West	32.8	Flat	Centre	37.1	9.3	6.1	-3.2	1.1	-6.1	3.2	-1.1
OSullivan Beach	January 6	8	30	Yes	4:08pm	40	0	Lower	Nerita atramentosa	Dry	37.6	Centre	Flat	41.6	Edge	Centre	34.3	Flat	Centre	37.4	7.3	4	-3.3	-0.2	-4	3.3	0.2
OSullivan Beach	January 6	8	31	Yes	4:10pm	40	0	Lower	Nerita atramentosa	Wet	32.4	Centre	Flat	39.5	Flat	Centre	29.6	Flat	Centre	33.6	9.9	7.1	-2.8	1.2	-7.1	2.8	-1.2
OSullivan Beach	January 6	8	34	Yes	4:13pm	40	0	Lower	Nerita atramentosa	Dry	34.8	East	Flat	39.2	Depression	East	28.3	Edge	West	34	10.9	4.4	-6.5	-0.8	-4.4	6.5	0.8
OSullivan Beach	January 6	8	35	Yes	4:14pm	40	0	Lower	Nerita atramentosa	Wet	33.5	West	Flat	41.7	Flat	East	30.2	Flat	Centre	36.3	11.5	8.2	-3.3	2.8	-8.2	3.3	-2.8
OSullivan Beach	January 6	8	36	Yes	4:16pm	40	0	Lower	Nerita atramentosa	Dry	34.4	East	Edge	39.7	Edge	West	31.8	Flat	East	36	7.9	5.3	-2.6	1.6	-5.3	2.6	-1.6
OSullivan Beach	January 6	8	37	Yes	4:18pm	40	0	Lower	Nerita atramentosa	Wet	31.2	Centre	Flat	35.7	Edge	Centre	27.1	Peak	Centre	31.3	8.6	4.5	-4.1	0.1	-4.5	4.1	-0.1
OSullivan Beach	January 6	8	38	Yes	4:20pm	40	0	Lower	Nerita atramentosa	Wet	32.4	East	Flat	39.9	Flat	West	28.2	Edge	East	34.4	11.7	7.5	-4.2	2	-7.5	4.2	-2
OSullivan Beach	January 6	8	40	Yes	4:23pm	40	0	Lower	Nerita atramentosa	Dry	36.7	East	Edge	46.5	Edge	Centre	34.5	Flat	Centre	40.3	12	9.8	-2.2	3.6	-9.8	2.2	-3.6
OSullivan Beach	January 6	8	4	No	3:23pm	40	0	Lower	Diloma concamerata	Wet	34.8	Centre	Flat	41.9	Depression	West	33	Edge	East	36.4	8.9	7.1	-1.8	1.6	-7.1	1.8	-1.6
OSullivan Beach	January 6	8	8	No	3:28pm	40	0	Lower	Diloma concamerata	Wet	32.5	East	Edge	37.8	Edge	Centre	31.6	Flat	Centre	33.8	6.2	5.3	-0.9	1.3	-5.3	0.9	-1.3
OSullivan Beach	January 6	8	11	No	3:34pm	40	0	Lower	Diloma concamerata	Wet	34	West	Flat	39.1	Edge	West	32.5	Flat	West	36	6.6	5.1	-1.5	2	-5.1	1.5	-2
OSullivan Beach	January 6	8	14	No	3:39pm	40	0	Lower	Diloma concamerata	Wet	32	Centre	Flat	35.9	Edge	West	30.2	Flat	Centre	32.8	5.7	3.9	-1.8	0.8	-3.9	1.8	-0.8
OSullivan Beach	January 6	8	16	No	3:43pm	40	0	Lower	Diloma concamerata	Wet	34.9	West	Edge	36	Flat	East	32.7	Flat	Centre	36	3.3	1.1	-2.2	1.1	-1.1	2.2	-1.1
OSullivan Beach	January 6	8	20	No	3:53pm	40	0	Lower	Diloma concamerata	Wet	35	Centre	Flat	41.3	Edge	West	32.3	Edge	East	36.3	9	6.3	-2.7	1.3	-6.3	2.7	-1.3
OSullivan Beach	January 6	8	21	Yes	3:54pm	40	0	Lower	Diloma concamerata	Wet	30.8	West	Flat	39.9	Edge	East	29.3	Edge	West	33.6	10.6	9.1	-1.5	2.8	-9.1	1.5	-2.8
OSullivan Beach	January 6	8	25	No	4:04pm	40	0	Lower	Diloma concamerata	Dry	32.3	East	Flat	38.1	Edge	West	28.7	Peak	Centre	33.6	9.4	5.8	-3.6	1.3	-5.8	3.6	-1.3
OSullivan Beach	January 6	8	26	Yes	4:05pm	40	0	Lower	Diloma concamerata	Dry	33.4	Centre	Flat	39.1	Edge	West	31	Flat	Centre	34.7	8.1	5.7	-2.4	1.3	-5.7	2.4	-1.3
OSullivan Beach	January 6	8	27	Yes	4:06pm	40	0	Lower	Diloma concamerata	Wet	36.2	Centre	Depression	38.1	Edge	Centre	33.9	Flat	Centre	35.6	4.2	1.9	-2.3	-0.6	-1.9	2.3	0.6
OSullivan Beach	January 6	8	31	No	4:10pm	40	0	Lower	Diloma concamerata	Wet	34.8	Centre	Flat	39.5	Flat	Centre	29.6	Flat	Centre	33.6	9.9	4.7	-5.2	-1.2	-4.7	5.2	1.2
OSullivan Beach	January 6	8	32	Yes	4:11pm	40	0	Lower	Diloma concamerata	Dry	32.3	East	Edge	37.1	Depression	West	28.2	Flat	East	32.9	8.9	4.8	-4.1	0.6	-4.8	4.1	-0.6
OSullivan Beach	January 6	8	33	Yes	4:11pm	40	0	Lower	Diloma concamerata	Dry	30.5	Centre	Depression	38.2	Edge	West	27.7	Flat	East	31.7	10.5	7.7	-2.8	1.2	-7.7	2.8	-1.2
OSullivan Beach	January 6	8	34	No	4:13pm	40	0	Lower	Diloma concamerata	Dry	33.8	Centre	Flat	39.2	Depression	East	28.3	Edge	West	34	10.9	5.4	-5.5	0.2	-5.4	5.5	-0.2
OSullivan Beach	January 6	8	35	No	4:14pm	40	0	Lower	Diloma concamerata	Wet	32.9	Centre	Flat	41.7	Flat	East	30.2	Flat	Centre	36.3	11.5	8.8	-2.7	3.4	-8.8	2.7	-3.4
OSullivan Beach	January 6	8	37	No	4:18pm	40	0	Lower	Diloma concamerata	Wet	30.9	Centre	Drop	35.7	Edge	Centre	27.1	Flat	Centre	31.3	8.6	4.8	-3.8	0.4	-4.8	3.8	-0.4
OSullivan Beach	January 6	8	38	No	4:20pm	40	0	Lower	Diloma concamerata	Wet	32.4	East	Flat	39.9	Edge	West	27.6	Edge	East	34.4	12.3	7.5	-4.8	2	-7.5	4.8	-2
OSullivan Beach	January 6	8	39	Yes	4:22pm	40	0	Lower	Diloma concamerata	Dry	35.3	West	Edge	38.1	Edge	East	31.6	Flat	Centre	34.3	6.5	2.8	-3.7	-1	-2.8	3.7	1
OSullivan Beach	January 6	8	42	Yes	4:25pm	40	0	Lower	Diloma concamerata	Wet	33.5	Centre	Flat	41.8	Edge	West	32.3	Depression	West	35.6	9.5	8.3	-1.2	2.1	-8.3	1.2	-2.1
OSullivan Beach	January 6	8	43	Yes	4:26pm	40	0	Lower	Diloma concamerata	Wet	32.6	Centre	Flat	37	Edge	East	30.9	Drop	West	33	6.1	4.4	-1.7	0.4	-4.4	1.7	-0.4
OSullivan Beach	January 6	8	45	Yes	4:34pm	40	0	Lower	Diloma concamerata	Wet	30.7	East	Depression	39.6	Flat	West	28.2	Flat	East	33.3	11.4	8.9	-2.5	2.6	-8.9	2.5	-2.6
OSullivan Beach	January 6	8	46	Yes	4:35pm	40	0	Lower	Diloma concamerata	Wet	31.8	Centre	Edge	38.3	Edge	Centre	31.5	Flat	West	34.3	6.8	6.5	-0.3	2.5	-6.5	0.3	-2.5
OSullivan Beach	January 6	8	51	Yes	4:43pm	40	0	Upper	Diloma concamerata	Wet	33.2	Centre	Depression	36	Depression	East	30.6	Depression	Centre	33.6	5.4	2.8	-2.6	0.4	-2.8	2.6	-0.4
OSullivan Beach	January 6	8	1	Yes	3:20pm	40	0	Lower	Bembicium nanum	Dry	42	Centre	Flat	44.3	Edge	West	38.1	Flat	East	40.8	6.2	2.3	-3.9	-1.2	-2.3	3.9	1.2
OSullivan Beach	January 6	8	5	Yes	3:26pm	40	0	Lower	Bembicium nanum	Dry	39.6	Centre	Flat	42.3	Depression	West	37.7	Flat	Centre	39.9	4.6	2.7	-1.9	0.3	-2.7	1.9	-0.3
OSullivan Beach	January 6	8	9	Yes	3:30pm	40	0	Lower	Bembicium nanum	Dry	39.2	Centre	Flat	42.3	Edge	Centre	36.3	Flat	West	37.9	6	3.1	-2.9	-1.3	-3.1	2.9	1.3
OSullivan Beach	January 6	8	13	Yes	3:39pm	40	0	Lower	Bembicium nanum	Dry	37.3	East	Flat	45.1	Flat	Centre	35.1	Flat	Centre	39	10	7.8	-2.2	1.7	-7.8	2.2	-1.7
OSullivan Beach	January 6	8	41	Yes	4:23pm	40	0	Lower	Bembicium nanum	Dry	40.2	Centre	Flat	43.6	Flat	West	34.2	Peak	East	39.8	9.4	3.4	-6	-0.4	-3.4	6	0.4
OSullivan Beach	January 6	8	44	Yes	4:33pm	40	0	Lower	Bembicium nanum	Dry	39.8	Centre	Edge	44.5	Edge	Centre	38	Flat	Centre	40.7	6.5	4.7	-1.8	0.9	-4.7	1.8	-0.9
OSullivan Beach	January 6	8	47	Yes	4:38pm	40	0	Lower	Bembicium nanum	Dry	44	Centre	Edge	47	Edge	West	37.4	Flat	Centre	42	9.6	3	-6.6	-2	-3	6.6	2
OSullivan Beach	January 6	8	48	Yes	4:39pm	40	0	Lower	Bembicium nanum	Dry	42.6	East	Flat	48.1	Edge	Centre	39.2	Edge	East	43.5	8.9	5.5	-3.4	0.9	-5.5	3.4	-0.9
OSullivan Beach	January 6	8	49	Yes	4:40pm	40	0	Lower	Bembicium nanum	Dry	41.6	Centre	Flat	43	Edge	Centre	36.7	Flat	West	40	6.3	1.4	-4.9	-1.6	-1.4	4.9	1.6
OSullivan Beach	January 6	8	50	Yes	4:41pm	40	0	Lower	Bembicium nanum	Dry	42.1	Centre	Drop	48.4	Edge	West	37.6	Flat	East	43.1	10.8	6.3	-4.5	1	-6.3	4.5	-1
OSullivan Beach	January 6	8	52	Yes	4:45pm	40	0	Lower	Bembicium nanum	Dry	41.8	Centre	Flat	47.1	Edge	West	40.6	Flat	Centre	42.7	6.5	5.3	-1.2	0.9	-5.3	1.2	-0.9
OSullivan Beach	January 6	8	53	Yes	4:57pm	40	0	Upper	Bembicium nanum	Dry	43.1	East	Edge	45.3	Depression	East	39.3	Depression	Centre	42.6	6	2.2	-3.8	-0.5	-2.2	3.8	0.5
OSullivan Beach	January 6	8	54	Yes	4:58pm	40	0	Upper	Bembicium nanum	Dry	41.6	West	Flat	46.7	Flat	Centre	38.8	Flat	Centre	41	7.9	5.1	-2.8	-0.6	-5.1	2.8	0.6
OSullivan Beach	January 6	8	55	Yes	4:59pm	40	0	Upper	Bembicium nanum	Dry	43.6	West	Flat	48.8	Edge	West	39.3	Flat	East	43.8	9.5	5.2	-4.3	0.2	-5.2	4.3	-0.2
OSullivan Beach	January 6	8	56	Yes	5:00pm	40	0	Upper	Bembicium nanum	Dry	42.7	West	Flat	47.2	Edge	East	38.2	Flat	West	41.8	9	4.5	-4.5	-0.9	-4.5	4.5	0.9
OSullivan Beach	January 6	8	57	Yes	5:02pm	40	0	Upper	Bembicium nanum	Dry	42.5	Centre	Flat	48	Depression	West	33.9	Edge	East	42.3	14.1	5.5	-8.6	-0.2	-5.5	8.6	0.2
OSullivan Beach	January 6	8	58	Yes	5:04pm	40	0	Upper	Bembicium nanum	Dry	40.8	Centre	Flat	45.2	Flat	East	38.3	Flat	Centre	40.8	6.9	4.4	-2.5	0	-4.4	2.5	0
OSullivan Beach	January 6	8	59	Yes	5:05pm	40	0	Upper	Bembicium nanum	Dry	43	West	Flat	49.2	Edge	West	37.7	Edge	East	42.7	11.5	6.2	-5.3	-0.3	-6.2	5.3	0.3
OSullivan Beach	January 6	8	60	Yes	5:06pm	40	0	Upper	Bembicium nanum	Dry	41.3	Centre	Depression	44.7	Edge	Centre	35.9	Flat	East	40.3	8.8	3.4	-5.4	-1	-3.4	5.4	1
OSullivan Beach	January 6	8	61	Yes	5:07pm	40	0	Upper	Bembicium nanum	Wet	37.7	West	Edge	43.3	Edge	West	34.4	Peak	Centre	38.4	8.9	5.6	-3.3	0.7	-5.6	3.3	-0.7
OSullivan Beach	January 6	8	62	Yes	5:09pm	40	0	Upper	Bembicium nanum	Dry	42.8	West	Edge	44.9	Flat	Centre	35.7	Flat	East	40.6	9.2	2.1	-7.1	-2.2	-2.1	7.1	2.2
OSullivan Beach	January 6	8	63	Yes	5:10pm	40	0	Upper	Bembicium nanum	Dry	39.5	West	Edge	45.4	Drop	West	36.7	Flat	East	40.1	8.7	5.9	-2.8	0.6	-5.9	2.8	-0.6
OSullivan Beach	January 6	8	64	Yes	5:11pm	40	0	Upper	Bembicium nanum	Dry	40	Centre	Flat	44.3	Edge	Centre	34	Edge	West	40.4	10.3	4.3	-6	0.4	-4.3	6	-0.4
OSullivan Beach	January 6	8	65	Yes	5:12pm	40	0	Upper	Bembicium nanum	Dry	38.2	West	Flat	43	Edge	East	37.1	Depression	West	38.9	5.9	4.8	-1.1	0.7	-4.8	1.1	-0.7
OSullivan Beach	January 6	8	66	Yes	5:13pm	40	0	Upper	Bembicium nanum	Dry	42.7	Centre	Flat	48.9	Edge	West	41.2	Edge	Centre	44.5	7.7	6.2	-1.5	1.8	-6.2	1.5	-1.8
OSullivan Beach	January 6	8	67	Yes	5:15pm	40	0	Upper	Bembicium nanum	Dry	39.5	West	Flat	42.8	Flat	Centre	36.7	Peak	Centre	39.8	6.1	3.3	-2.8	0.3	-3.3	2.8	-0.3
OSullivan Beach	January 6	8	68	Yes	5:16pm	40	0	Upper	Bembicium nanum	Dry	36.5	Centre	Flat	42.3	Edge	West	35.9	Depression	Centre	38	6.4	5.8	-0.6	1.5	-5.8	0.6	-1.5
OSullivan Beach	January 6	8	69	Yes	5:18pm	40	0	Upper	Bembicium nanum	Dry	48.4	West	Edge	50	Flat	Centre	40.2	Depression	East	44.3	9.8	1.6	-8.2	-4.1	-1.6	8.2	4.1
OSullivan Beach	January 6	8	70	Yes	5:19pm	40	0	Upper	Bembicium nanum	Wet	40.4	West	Depression	44	Edge	West	34.8	Flat	East	39.2	9.2	3.6	-5.6	-1.2	-3.6	5.6	1.2
OSullivan Beach	January 6	8	71	Yes	5:21pm	40	0	Upper	Bembicium nanum	Dry	35.9	Centre	Flat	39.4	Edge	West	34.3	Depression	East	36	5.1	3.5	-1.6	0.1	-3.5	1.6	-0.1
Marino Rocks	January 10	4	1	Yes	11:52am	27	0	Lower	Nerita atramentosa	Wet	27.8	Centre	Edge	30	Edge	Centre	26.8	Flat	West	27.8	3.2	2.2	-1	0	-2.2	1	0
Marino Rocks	January 10	4	2	Yes	11:54am	27	0	Lower	Nerita atramentosa	Wet	32.5	Centre	Edge	33.8	Edge	East	26	Flat	Centre	28.7	7.8	1.3	-6.5	-3.8	-1.3	6.5	3.8
Marino Rocks	January 10	4	3	Yes	11:56am	27	0	Lower	Nerita atramentosa	Wet	32.7	Centre	Flat	37.5	Edge	East	31.2	Edge	East	34.8	6.3	4.8	-1.5	2.1	-4.8	1.5	-2.1
Marino Rocks	January 10	4	4	Yes	12:00pm	27	0	Lower	Nerita atramentosa	Wet	32.1	Centre	Flat	38.1	Edge	Centre	29	Edge	Centre	32.6	9.1	6	-3.1	0.5	-6	3.1	-0.5
Marino Rocks	January 10	4	5	Yes	12:01pm	27	0	Lower	Nerita atramentosa	Wet	28.6	Centre	Flat	32.3	Edge	West	28.1	Flat	Centre	29.9	4.2	3.7	-0.5	1.3	-3.7	0.5	-1.3
Marino Rocks	January 10	4	6	Yes	12:03pm	27	0	Lower	Nerita atramentosa	Dry	34.3	Centre	Flat	37.6	Edge	Centre	31.2	Depression	West	34.2	6.4	3.3	-3.1	-0.1	-3.3	3.1	0.1
Marino Rocks	January 10	4	7	Yes	12:05pm	27	0	Lower	Nerita atramentosa	Wet	34.5	Centre	Flat	37.4	Edge	East	30.2	Flat	West	32.6	7.2	2.9	-4.3	-1.9	-2.9	4.3	1.9
Marino Rocks	January 10	4	8	Yes	12:06pm	27	0	Lower	Nerita atramentosa	Wet	29.8	East	Flat	35.8	Edge	East	28.4	Flat	Centre	30.6	7.4	6	-1.4	0.8	-6	1.4	-0.8
Marino Rocks	January 10	4	9	Yes	12:08pm	27	0	Lower	Nerita atramentosa	Dry	32.4	Centre	Flat	34	Edge	Centre	28.3	Edge	West	31.2	5.7	1.6	-4.1	-1.2	-1.6	4.1	1.2
Marino Rocks	January 10	4	10	Yes	12:09pm	27	0	Lower	Nerita atramentosa	Dry	32	West	Flat	37.6	Edge	East	29.9	Flat	West	33	7.7	5.6	-2.1	1	-5.6	2.1	-1
Marino Rocks	January 10	4	11	Yes	12:10pm	27	0	Lower	Nerita atramentosa	Wet	30.8	West	Edge	37.4	Edge	East	27.8	Flat	Centre	30.8	9.6	6.6	-3	0	-6.6	3	0
Marino Rocks	January 10	4	12	Yes	12:11pm	27	0	Lower	Nerita atramentosa	Wet	33.7	West	Flat	37.8	Edge	Centre	29.4	Edge	West	34	8.4	4.1	-4.3	0.3	-4.1	4.3	-0.3
Marino Rocks	January 10	4	13	Yes	12:12pm	27	0	Lower	Nerita atramentosa	Wet	31.3	Centre	Flat	36.8	Edge	East	28.7	Flat	West	31.2	8.1	5.5	-2.6	-0.1	-5.5	2.6	0.1
Marino Rocks	January 10	4	15	Yes	12:16pm	27	0	Lower	Nerita atramentosa	Dry	37	Centre	Flat	40.2	Depression	West	33.6	Flat	East	36.5	6.6	3.2	-3.4	-0.5	-3.2	3.4	0.5
Marino Rocks	January 10	4	16	Yes	12:18pm	27	0	Lower	Nerita atramentosa	Dry	34.5	Centre	Flat	41.7	Edge	East	34.4	Flat	Centre	36.6	7.3	7.2	-0.1	2.1	-7.2	0.1	-2.1
Marino Rocks	January 10	4	17	Yes	12:20pm	27	0	Lower	Nerita atramentosa	Wet	31.4	Centre	Flat	36.9	Depression	East	27.4	Edge	West	31.1	9.5	5.5	-4	-0.3	-5.5	4	0.3
Marino Rocks	January 10	4	18	Yes	12:23pm	27	0	Lower	Nerita atramentosa	Wet	31.9	East	Flat	38.1	Edge	West	29.9	Flat	East	33.8	8.2	6.2	-2	1.9	-6.2	2	-1.9
Marino Rocks	January 10	4	19	Yes	12:24pm	27	0	Lower	Nerita atramentosa	Wet	28.6	East	Flat	35.8	Edge	Centre	27.6	Flat	East	31.3	8.2	7.2	-1	2.7	-7.2	1	-2.7
Marino Rocks	January 10	4	20	Yes	12:25pm	27	0	Lower	Nerita atramentosa	Dry	33.9	East	Flat	38.4	Edge	West	31.1	Flat	Centre	34.4	7.3	4.5	-2.8	0.5	-4.5	2.8	-0.5
Marino Rocks	January 10	4	21	Yes	12:27pm	27	0	Lower	Nerita atramentosa	Dry	31.8	East	Flat	37	Flat	East	29.5	Flat	Centre	32.8	7.5	5.2	-2.3	1	-5.2	2.3	-1
Marino Rocks	January 10	4	22	Yes	12:28pm	27	0	Lower	Nerita atramentosa	Dry	32.7	Centre	Flat	36.8	Edge	East	30.2	Flat	Centre	32.7	6.6	4.1	-2.5	0	-4.1	2.5	0
Marino Rocks	January 10	4	23	Yes	12:31pm	27	0	Lower	Nerita atramentosa	Wet	31.3	East	Flat	34.3	Edge	West	29.5	Flat	Centre	31.8	4.8	3	-1.8	0.5	-3	1.8	-0.5
Marino Rocks	January 10	4	24	Yes	12:33pm	27	0	Lower	Nerita atramentosa	Dry	33.2	West	Flat	38.7	Edge	Centre	29.8	Flat	Centre	32.8	8.9	5.5	-3.4	-0.4	-5.5	3.4	0.4
Marino Rocks	January 10	4	25	Yes	12:35pm	27	0	Lower	Nerita atramentosa	Wet	30.4	Centre	Flat	40.5	Edge	Centre	28.7	Flat	Centre	32.5	11.8	10.1	-1.7	2.1	-10.1	1.7	-2.1
Marino Rocks	January 10	4	26	Yes	12:37pm	27	0	Lower	Nerita atramentosa	Dry	35	Centre	Flat	38.4	Flat	East	33.3	Flat	East	35.6	5.1	3.4	-1.7	0.6	-3.4	1.7	-0.6
Marino Rocks	January 10	4	27	Yes	12:38pm	27	0	Lower	Nerita atramentosa	Dry	31.8	East	Edge	41.3	Edge	West	31.8	Flat	Centre	36.4	9.5	9.5	0	4.6	-9.5	0	-4.6
Marino Rocks	January 10	4	28	Yes	12:41pm	27	0	Lower	Nerita atramentosa	Wet	32.9	Centre	Flat	36.1	Flat	West	29.6	Edge	East	32.1	6.5	3.2	-3.3	-0.8	-3.2	3.3	0.8
Marino Rocks	January 10	4	29	Yes	12:42pm	27	0	Lower	Nerita atramentosa	Dry	31	East	Flat	35.5	Edge	Centre	30.2	Flat	Centre	32.6	5.3	4.5	-0.8	1.6	-4.5	0.8	-1.6
Marino Rocks	January 10	4	30	Yes	12:44pm	27	0	Lower	Nerita atramentosa	Dry	32.6	West	Edge	38.2	Flat	East	29.4	Flat	West	33	8.8	5.6	-3.2	0.4	-5.6	3.2	-0.4
Marino Rocks	January 10	4	31	Yes	12:45pm	27	0	Lower	Nerita atramentosa	Dry	35.3	Centre	Flat	40.3	Edge	East	32.9	Flat	West	36.2	7.4	5	-2.4	0.9	-5	2.4	-0.9
Marino Rocks	January 10	4	1	No	11:52am	27	0	Lower	Diloma concamerata	Wet	27.4	West	Flat	30	Edge	Centre	26.5	Flat	West	27.8	3.5	2.6	-0.9	0.4	-2.6	0.9	-0.4
Marino Rocks	January 10	4	2	No	11:54am	27	0	Lower	Diloma concamerata	Wet	26.4	Centre	Flat	33.8	Edge	East	26	Flat	Centre	28.7	7.8	7.4	-0.4	2.3	-7.4	0.4	-2.3
Marino Rocks	January 10	4	4	No	12:00pm	27	0	Lower	Diloma concamerata	Wet	33.5	Centre	Flat	38.1	Edge	Centre	29	Edge	Centre	32.6	9.1	4.6	-4.5	-0.9	-4.6	4.5	0.9
Marino Rocks	January 10	4	6	No	12:03pm	27	0	Lower	Diloma concamerata	Dry	33.5	Centre	Flat	37.6	Edge	Centre	31.2	Depression	West	34.2	6.4	4.1	-2.3	0.7	-4.1	2.3	-0.7
Marino Rocks	January 10	4	7	No	12:05pm	27	0	Lower	Diloma concamerata	Dry	30.5	West	Flat	37.4	Edge	Centre	30.1	Flat	West	32.6	7.3	6.9	-0.4	2.1	-6.9	0.4	-2.1
Marino Rocks	January 10	4	8	No	12:06pm	27	0	Lower	Diloma concamerata	Wet	29.1	Centre	Flat	35.8	Edge	East	28.4	Flat	Centre	30.6	7.4	6.7	-0.7	1.5	-6.7	0.7	-1.5
Marino Rocks	January 10	4	14	Yes	12:14pm	27	0	Lower	Diloma concamerata	Dry	35.5	Centre	Flat	42.3	Edge	Centre	31	Flat	Centre	35.3	11.3	6.8	-4.5	-0.2	-6.8	4.5	0.2
Marino Rocks	January 10	4	17	No	12:20pm	27	0	Lower	Diloma concamerata	Wet	31.3	Centre	Flat	36.9	Edge	East	27.4	Edge	West	31.1	9.5	5.6	-3.9	-0.2	-5.6	3.9	0.2
Marino Rocks	January 10	4	19	No	12:24pm	27	0	Lower	Diloma concamerata	Wet	29.6	Centre	Flat	35.8	Edge	Centre	27.6	Flat	East	31.3	8.2	6.2	-2	1.7	-6.2	2	-1.7
Marino Rocks	January 10	4	21	No	12:27pm	27	0	Lower	Diloma concamerata	Dry	33.1	East	Flat	37	Flat	East	29.5	Flat	Centre	32.8	7.5	3.9	-3.6	-0.3	-3.9	3.6	0.3
Marino Rocks	January 10	4	23	No	12:31pm	27	0	Lower	Diloma concamerata	Wet	32.3	Centre	Flat	34.3	Edge	West	29.5	Flat	Centre	31.8	4.8	2	-2.8	-0.5	-2	2.8	0.5
Marino Rocks	January 10	4	24	No	12:33pm	27	0	Lower	Diloma concamerata	Dry	32.9	Centre	Flat	38.7	Edge	Centre	29.8	Flat	Centre	32.8	8.9	5.8	-3.1	-0.1	-5.8	3.1	0.1
Marino Rocks	January 10	4	25	No	12:35pm	27	0	Lower	Diloma concamerata	Wet	32.1	Centre	Flat	40.5	Edge	Centre	28.5	Edge	Centre	32.5	12	8.4	-3.6	0.4	-8.4	3.6	-0.4
Marino Rocks	January 10	4	26	No	12:37pm	27	0	Lower	Diloma concamerata	Dry	35.4	West	Flat	38.4	Flat	East	33.3	Flat	Centre	35.6	5.1	3	-2.1	0.2	-3	2.1	-0.2
Marino Rocks	January 10	4	28	No	12:41pm	27	0	Lower	Diloma concamerata	Wet	32.1	West	Flat	36.1	Edge	West	29.5	Edge	East	32.1	6.6	4	-2.6	0	-4	2.6	0
Marino Rocks	January 10	4	29	No	12:42pm	27	0	Lower	Diloma concamerata	Dry	31.7	East	Flat	35.3	Edge	Centre	30	Flat	Centre	32.6	5.3	3.6	-1.7	0.9	-3.6	1.7	-0.9
Marino Rocks	January 10	4	32	Yes	12:47pm	27	0	Lower	Diloma concamerata	Wet	32.7	Centre	Flat	36.9	Edge	East	28.7	Flat	Centre	32.1	8.2	4.2	-4	-0.6	-4.2	4	0.6
Marino Rocks	January 10	4	33	Yes	12:49pm	27	0	Lower	Diloma concamerata	Dry	29.2	West	Flat	37.1	Edge	Centre	26.9	Flat	Centre	31	10.2	7.9	-2.3	1.8	-7.9	2.3	-1.8
Marino Rocks	January 10	4	34	Yes	12:50pm	27	0	Lower	Diloma concamerata	Wet	36.1	East	Flat	37.8	Edge	Centre	30.6	Peak	West	33.4	7.2	1.7	-5.5	-2.7	-1.7	5.5	2.7
Marino Rocks	January 10	4	35	Yes	12:54pm	27	0	Lower	Diloma concamerata	Wet	30.9	East	Flat	35.8	Edge	East	29.2	Flat	Centre	31.3	6.6	4.9	-1.7	0.4	-4.9	1.7	-0.4
Marino Rocks	January 10	4	36	Yes	12:55pm	27	0	Lower	Diloma concamerata	Wet	32.1	East	Edge	35.3	Edge	East	29.3	Flat	West	31.9	6	3.2	-2.8	-0.2	-3.2	2.8	0.2
Marino Rocks	January 10	4	37	Yes	12:56pm	27	0	Lower	Diloma concamerata	Wet	30.2	East	Flat	34	Edge	East	27.7	Flat	Centre	30	6.3	3.8	-2.5	-0.2	-3.8	2.5	0.2
Marino Rocks	January 10	4	38	Yes	12:58pm	27	0	Lower	Diloma concamerata	Dry	31.6	East	Depression	37.6	Edge	Centre	28.7	Flat	East	32.5	8.9	6	-2.9	0.9	-6	2.9	-0.9
Marino Rocks	January 10	4	39	Yes	1:01pm	27	0	Lower	Diloma concamerata	Dry	32.5	West	Flat	36.3	Edge	East	30.2	Flat	Centre	32.9	6.1	3.8	-2.3	0.4	-3.8	2.3	-0.4
Marino Rocks	January 10	4	40	Yes	1:03pm	27	0	Lower	Diloma concamerata	Dry	33.8	Centre	Flat	41.9	Flat	East	31	Peak	Centre	35.9	10.9	8.1	-2.8	2.1	-8.1	2.8	-2.1
Marino Rocks	January 10	4	41	Yes	1:14pm	27	0	Lower	Diloma concamerata	Wet	34.5	East	Flat	39.2	Edge	Centre	31.3	Edge	Centre	34.9	7.9	4.7	-3.2	0.4	-4.7	3.2	-0.4
Marino Rocks	January 10	4	42	Yes	1:16pm	27	0	Lower	Diloma concamerata	Wet	30.7	West	Edge	34.1	Edge	West	29.1	Peak	East	31.1	5	3.4	-1.6	0.4	-3.4	1.6	-0.4
Marino Rocks	January 10	4	43	Yes	1:17pm	27	0	Lower	Diloma concamerata	Dry	32.2	Centre	Flat	36.1	Edge	Centre	29.8	Flat	Centre	32.3	6.3	3.9	-2.4	0.1	-3.9	2.4	-0.1
Marino Rocks	January 10	4	44	Yes	1:19pm	27	0	Lower	Diloma concamerata	Wet	32.2	Centre	Flat	35.3	Edge	West	29.7	Flat	Centre	32	5.6	3.1	-2.5	-0.2	-3.1	2.5	0.2
Marino Rocks	January 10	4	45	Yes	1:20pm	27	0	Lower	Diloma concamerata	Wet	34.2	Centre	Flat	42.7	Edge	East	31.5	Flat	Centre	38	11.2	8.5	-2.7	3.8	-8.5	2.7	-3.8
Marino Rocks	January 10	4	15	No	12:16pm	27	0	Upper	Bembicium nanum	Wet	37.4	Centre	Edge	40.2	Depression	West	33.6	Edge	East	36.5	6.6	2.8	-3.8	-0.9	-2.8	3.8	0.9
Marino Rocks	January 10	4	25	No	12:35pm	27	0	Upper	Bembicium nanum	Wet	36.8	Centre	Edge	40.5	Edge	Centre	28.4	Edge	Centre	32.5	12.1	3.7	-8.4	-4.3	-3.7	8.4	4.3
Marino Rocks	January 10	4	46	Yes	1:32pm	28	0	Lower	Bembicium nanum	Dry	36.8	West	Flat	39.4	Edge	West	33.5	Flat	Centre	35.8	5.9	2.6	-3.3	-1	-2.6	3.3	1
Marino Rocks	January 10	4	47	Yes	1:34pm	28	0	Lower	Bembicium nanum	Dry	38.8	Centre	Flat	41.8	Flat	Centre	36.1	Flat	East	38.8	5.7	3	-2.7	0	-3	2.7	0
Marino Rocks	January 10	4	48	Yes	1:36pm	28	0	Lower	Bembicium nanum	Dry	31.1	Centre	Flat	39.1	Edge	Centre	26.7	Flat	Centre	32.7	12.4	8	-4.4	1.6	-8	4.4	-1.6
Marino Rocks	January 10	4	49	Yes	1:38pm	28	0	Lower	Bembicium nanum	Dry	38.8	East	Flat	43.5	Edge	Centre	29.2	Edge	West	35	14.3	4.7	-9.6	-3.8	-4.7	9.6	3.8
Marino Rocks	January 10	4	50	Yes	1:39pm	28	0	Lower	Bembicium nanum	Dry	35.1	East	Flat	42.4	Depression	East	30.4	Flat	West	35.8	12	7.3	-4.7	0.7	-7.3	4.7	-0.7
Marino Rocks	January 10	4	51	Yes	1:40pm	28	0	Lower	Bembicium nanum	Dry	40	East	Flat	40.9	Flat	East	35.9	Flat	East	38.1	5	0.9	-4.1	-1.9	-0.9	4.1	1.9
Marino Rocks	January 10	4	52	Yes	1:44pm	28	0	Lower	Bembicium nanum	Dry	33.6	Centre	Flat	39.6	Depression	Centre	32.9	Flat	Centre	35.3	6.7	6	-0.7	1.7	-6	0.7	-1.7
Marino Rocks	January 10	4	53	Yes	1:47pm	28	0	Lower	Bembicium nanum	Dry	34.6	East	Flat	39.7	Edge	West	30.6	Flat	Centre	34	9.1	5.1	-4	-0.6	-5.1	4	0.6
Marino Rocks	January 10	4	54	Yes	1:49pm	28	0	Lower	Bembicium nanum	Dry	37.5	Centre	Flat	42.2	Edge	West	35.5	Peak	Centre	38	6.7	4.7	-2	0.5	-4.7	2	-0.5
Marino Rocks	January 10	4	55	Yes	1:50pm	28	0	Lower	Bembicium nanum	Dry	37	Centre	Flat	40.2	Flat	West	33.8	Flat	Centre	37.4	6.4	3.2	-3.2	0.4	-3.2	3.2	-0.4
Marino Rocks	January 10	4	56	Yes	1:53pm	28	0	Lower	Bembicium nanum	Dry	33.1	Centre	Flat	40.7	Flat	Centre	29.8	Flat	East	34.8	10.9	7.6	-3.3	1.7	-7.6	3.3	-1.7
Marino Rocks	January 10	4	57	Yes	1:55pm	28	0	Lower	Bembicium nanum	Dry	37.1	Centre	Flat	40.7	Edge	Centre	34.5	Flat	West	37	6.2	3.6	-2.6	-0.1	-3.6	2.6	0.1
Marino Rocks	January 10	4	58	Yes	1:56pm	28	0	Lower	Bembicium nanum	Dry	37.7	East	Flat	40.8	Edge	Centre	36.3	Edge	West	38	4.5	3.1	-1.4	0.3	-3.1	1.4	-0.3
Marino Rocks	January 10	4	59	Yes	1:57pm	28	0	Lower	Bembicium nanum	Dry	35.7	West	Flat	39.7	Flat	Centre	29.6	Edge	East	34.4	10.1	4	-6.1	-1.3	-4	6.1	1.3
Marino Rocks	January 10	4	60	Yes	2:00pm	28	0	Lower	Bembicium nanum	Dry	39.8	Centre	Flat	42	Edge	Centre	34.6	Flat	Centre	38.1	7.4	2.2	-5.2	-1.7	-2.2	5.2	1.7
Marino Rocks	January 10	4	61	Yes	2:02pm	28	0	Lower	Bembicium nanum	Dry	32.8	Centre	Flat	40.3	Edge	West	27.9	Edge	East	34.2	12.4	7.5	-4.9	1.4	-7.5	4.9	-1.4
Marino Rocks	January 10	4	63	Yes	2:11pm	28	0	Lower	Bembicium nanum	Dry	39.3	Centre	Flat	44.9	Edge	Centre	37.2	Flat	Centre	40.4	7.7	5.6	-2.1	1.1	-5.6	2.1	-1.1
Marino Rocks	January 10	4	64	Yes	2:14pm	28	0	Lower	Bembicium nanum	Dry	38.7	East	Flat	43.2	Edge	West	35.4	Flat	East	39.2	7.8	4.5	-3.3	0.5	-4.5	3.3	-0.5
Marino Rocks	January 10	4	65	Yes	2:16pm	28	0	Lower	Bembicium nanum	Dry	34.5	East	Edge	39.4	Edge	West	31.6	Flat	East	35.3	7.8	4.9	-2.9	0.8	-4.9	2.9	-0.8
Marino Rocks	January 10	4	66	Yes	2:17pm	28	0	Lower	Bembicium nanum	Dry	36.8	Centre	Flat	40.3	Edge	East	35.1	Flat	West	37	5.2	3.5	-1.7	0.2	-3.5	1.7	-0.2
Marino Rocks	January 10	4	67	Yes	2:20pm	28	0	Lower	Bembicium nanum	Dry	37	East	Flat	42.3	Edge	Centre	32.7	Flat	Centre	36.6	9.6	5.3	-4.3	-0.4	-5.3	4.3	0.4
Marino Rocks	January 10	4	68	Yes	2:22pm	28	0	Lower	Bembicium nanum	Dry	33.8	East	Flat	38.2	Edge	Centre	32.7	Flat	East	35	5.5	4.4	-1.1	1.2	-4.4	1.1	-1.2
Marino Rocks	January 10	4	69	Yes	2:24pm	28	0	Lower	Bembicium nanum	Dry	34.9	East	Flat	36.5	Edge	East	33.3	Flat	Centre	34.1	3.2	1.6	-1.6	-0.8	-1.6	1.6	0.8
Marino Rocks	January 10	4	70	Yes	2:25pm	28	0	Lower	Bembicium nanum	Dry	35.6	Centre	Flat	38.1	Edge	East	32.2	Flat	East	34.7	5.9	2.5	-3.4	-0.9	-2.5	3.4	0.9
Marino Rocks	January 10	4	73	Yes	2:30pm	28	0	Lower	Bembicium nanum	Dry	39	West	Edge	42.1	Edge	Centre	36.2	Edge	Centre	38.5	5.9	3.1	-2.8	-0.5	-3.1	2.8	0.5
Marino Rocks	January 10	4	39	No	1:01pm	27	0	Lower	Bembicium nanum	Dry	32.3	Centre	Edge	36.3	Edge	East	30.2	Flat	Centre	32.9	6.1	4	-2.1	0.6	-4	2.1	-0.6
OSullivan Beach	January 12	3	2	Yes	12:38pm	26	0	Lower	Nerita atramentosa	Dry	30.7	Centre	Flat	37.1	Edge	Centre	29.6	Flat	Centre	32.6	7.5	6.4	-1.1	1.9	-6.4	1.1	-1.9
OSullivan Beach	January 12	3	3	Yes	12:40pm	26	0	Lower	Nerita atramentosa	Dry	32.1	Centre	Flat	35.6	Edge	Centre	29.4	Flat	Centre	32.2	6.2	3.5	-2.7	0.1	-3.5	2.7	-0.1
OSullivan Beach	January 12	3	4	Yes	12:43pm	26	0	Lower	Nerita atramentosa	Dry	31.7	East	Edge	33.7	Peak	East	25.1	Flat	East	28.7	8.6	2	-6.6	-3	-2	6.6	3
OSullivan Beach	January 12	3	5	Yes	12:44pm	26	0	Lower	Nerita atramentosa	Wet	29	East	Flat	35	Edge	West	27	Flat	East	31.9	8	6	-2	2.9	-6	2	-2.9
OSullivan Beach	January 12	3	8	Yes	12:48pm	26	0	Lower	Nerita atramentosa	Dry	30.8	Centre	Flat	37.8	Edge	West	28.1	Flat	Centre	32.7	9.7	7	-2.7	1.9	-7	2.7	-1.9
OSullivan Beach	January 12	3	10	Yes	12:51pm	26	0	Lower	Nerita atramentosa	Wet	31.4	Centre	Flat	35.4	Edge	West	25.2	Flat	Centre	30	10.2	4	-6.2	-1.4	-4	6.2	1.4
OSullivan Beach	January 12	3	11	Yes	12:52pm	26	0	Lower	Nerita atramentosa	Dry	32.5	West	Edge	37.3	Flat	East	29.3	Edge	West	32.8	8	4.8	-3.2	0.3	-4.8	3.2	-0.3
OSullivan Beach	January 12	3	12	Yes	12:54pm	26	0	Lower	Nerita atramentosa	Wet	32.6	Centre	Flat	38.3	Edge	Centre	31.6	Flat	East	34.6	6.7	5.7	-1	2	-5.7	1	-2
OSullivan Beach	January 12	3	13	Yes	12:56pm	26	0	Lower	Nerita atramentosa	Wet	29.8	West	Edge	37.7	Edge	East	26.8	Flat	East	31.4	10.9	7.9	-3	1.6	-7.9	3	-1.6
OSullivan Beach	January 12	3	14	Yes	12:59pm	26	0	Lower	Nerita atramentosa	Dry	33.5	Centre	Flat	39.1	Depression	West	30.5	Edge	East	34.5	8.6	5.6	-3	1	-5.6	3	-1
OSullivan Beach	January 12	3	15	Yes	1:01pm	26	0	Lower	Nerita atramentosa	Wet	34.9	West	Flat	39.3	Edge	Centre	27.8	Flat	Centre	34	11.5	4.4	-7.1	-0.9	-4.4	7.1	0.9
OSullivan Beach	January 12	3	16	Yes	1:03pm	26	0	Lower	Nerita atramentosa	Dry	33.9	West	Flat	37.1	Edge	East	28.9	Flat	West	32.8	8.2	3.2	-5	-1.1	-3.2	5	1.1
OSullivan Beach	January 12	3	17	Yes	1:05pm	26	0	Lower	Nerita atramentosa	Dry	32.8	Centre	Flat	38.4	Depression	West	30.7	Flat	Centre	33.5	7.7	5.6	-2.1	0.7	-5.6	2.1	-0.7
OSullivan Beach	January 12	3	20	Yes	1:09pm	26	0	Lower	Nerita atramentosa	Wet	34.6	Centre	Flat	39.8	Depression	East	32.4	Flat	Centre	35.5	7.4	5.2	-2.2	0.9	-5.2	2.2	-0.9
OSullivan Beach	January 12	3	21	Yes	1:11pm	26	0	Lower	Nerita atramentosa	Wet	28.6	East	Flat	34.3	Flat	West	26.9	Flat	Centre	30.7	7.4	5.7	-1.7	2.1	-5.7	1.7	-2.1
OSullivan Beach	January 12	3	23	Yes	1:14pm	26	0	Lower	Nerita atramentosa	Dry	32.8	East	Flat	39.2	Flat	West	29.8	Flat	East	34.4	9.4	6.4	-3	1.6	-6.4	3	-1.6
OSullivan Beach	January 12	3	24	Yes	1:16pm	26	0	Lower	Nerita atramentosa	Wet	35	West	Flat	37.1	Flat	West	29.7	Drop	Centre	33.6	7.4	2.1	-5.3	-1.4	-2.1	5.3	1.4
OSullivan Beach	January 12	3	26	Yes	1:20pm	26	0	Lower	Nerita atramentosa	Dry	31.2	West	Flat	34.6	Depression	East	28	Flat	Centre	31.6	6.6	3.4	-3.2	0.4	-3.4	3.2	-0.4
OSullivan Beach	January 12	3	27	Yes	1:22pm	26	0	Lower	Nerita atramentosa	Dry	28.7	Centre	Flat	32.4	Edge	Centre	25	Flat	West	28.8	7.4	3.7	-3.7	0.1	-3.7	3.7	-0.1
OSullivan Beach	January 12	3	28	Yes	1:24pm	26	0	Lower	Nerita atramentosa	Dry	31.1	Centre	Peak	37.8	Edge	East	27	Peak	Centre	32.7	10.8	6.7	-4.1	1.6	-6.7	4.1	-1.6
OSullivan Beach	January 12	3	29	Yes	1:25pm	26	0	Lower	Nerita atramentosa	Dry	33.2	West	Flat	39.9	Flat	East	30.4	Flat	Centre	34.2	9.5	6.7	-2.8	1	-6.7	2.8	-1
OSullivan Beach	January 12	3	30	Yes	1:34pm	27	4	Lower	Nerita atramentosa	Wet	34	Centre	Flat	39.7	Edge	West	32.6	Flat	Centre	35.5	7.1	5.7	-1.4	1.5	-5.7	1.4	-1.5
OSullivan Beach	January 12	3	31	Yes	1:35pm	27	4	Lower	Nerita atramentosa	Wet	30.4	East	Edge	39.2	Flat	West	28.3	Flat	East	33.1	10.9	8.8	-2.1	2.7	-8.8	2.1	-2.7
OSullivan Beach	January 12	3	32	Yes	1:37pm	27	4	Lower	Nerita atramentosa	Dry	32.8	West	Flat	35.3	Depression	West	28.1	Flat	Centre	32.3	7.2	2.5	-4.7	-0.5	-2.5	4.7	0.5
OSullivan Beach	January 12	3	33	Yes	1:38pm	27	4	Lower	Nerita atramentosa	Dry	30.7	Centre	Flat	36.3	Edge	Centre	29.6	Flat	East	32.9	6.7	5.6	-1.1	2.2	-5.6	1.1	-2.2
OSullivan Beach	January 12	3	35	Yes	1:41pm	27	4	Lower	Nerita atramentosa	Wet	31.1	Centre	Flat	38	Edge	West	27.3	Flat	Centre	32.5	10.7	6.9	-3.8	1.4	-6.9	3.8	-1.4
OSullivan Beach	January 12	3	37	Yes	1:44pm	27	4	Lower	Nerita atramentosa	Dry	37.8	Centre	Flat	43.4	Flat	West	35.3	Flat	East	39.2	8.1	5.6	-2.5	1.4	-5.6	2.5	-1.4
OSullivan Beach	January 12	3	41	Yes	1:52pm	27	4	Lower	Nerita atramentosa	Wet	30	West	Flat	35.9	Edge	West	28	Flat	Centre	31.8	7.9	5.9	-2	1.8	-5.9	2	-1.8
OSullivan Beach	January 12	3	43	Yes	1:54pm	27	4	Lower	Nerita atramentosa	Wet	32.8	West	Flat	38.9	Flat	East	30.7	Flat	Centre	34.4	8.2	6.1	-2.1	1.6	-6.1	2.1	-1.6
OSullivan Beach	January 12	3	49	Yes	2:06pm	27	2	Lower	Nerita atramentosa	Wet	35.4	Centre	Flat	40.1	Drop	East	31.2	Flat	Centre	34.6	8.9	4.7	-4.2	-0.8	-4.7	4.2	0.8
OSullivan Beach	January 12	3	4	No	12:43pm	26	0	Lower	Diloma concamerata	Dry	29	Centre	Edge	33.7	Depression	East	25.1	Flat	East	28.7	8.6	4.7	-3.9	-0.3	-4.7	3.9	0.3
OSullivan Beach	January 12	3	5	No	12:44pm	26	0	Lower	Diloma concamerata	Wet	32.6	Centre	Flat	35	Edge	West	27	Flat	East	31.9	8	2.4	-5.6	-0.7	-2.4	5.6	0.7
OSullivan Beach	January 12	3	6	Yes	12:46pm	26	0	Lower	Diloma concamerata	Dry	31.3	Centre	Flat	34.8	Edge	East	27.2	Flat	Centre	31.4	7.6	3.5	-4.1	0.1	-3.5	4.1	-0.1
OSullivan Beach	January 12	3	7	Yes	12:47pm	26	0	Lower	Diloma concamerata	Dry	31.8	Centre	Flat	37.8	Flat	Centre	26.8	Flat	East	31.8	11	6	-5	0	-6	5	0
OSullivan Beach	January 12	3	9	Yes	12:49pm	26	0	Lower	Diloma concamerata	Dry	31.3	East	Flat	33.7	Edge	West	28.5	Peak	West	31	5.2	2.4	-2.8	-0.3	-2.4	2.8	0.3
OSullivan Beach	January 12	3	10	No	12:51pm	26	0	Lower	Diloma concamerata	Wet	27	Centre	Flat	35.4	Edge	West	25.2	Flat	Centre	30	10.2	8.4	-1.8	3	-8.4	1.8	-3
OSullivan Beach	January 12	3	11	No	12:52pm	26	0	Lower	Diloma concamerata	Wet	32.1	East	Edge	37.3	Flat	East	29.1	Edge	East	32.8	8.2	5.2	-3	0.7	-5.2	3	-0.7
OSullivan Beach	January 12	3	13	No	12:56pm	26	0	Lower	Diloma concamerata	Wet	31.4	West	Flat	37.3	Edge	East	27.6	Flat	East	31.4	9.7	5.9	-3.8	0	-5.9	3.8	0
OSullivan Beach	January 12	3	15	No	1:01pm	26	0	Lower	Diloma concamerata	Wet	31.4	Centre	Flat	39.3	Edge	Centre	28.5	Flat	Centre	34	10.8	7.9	-2.9	2.6	-7.9	2.9	-2.6
OSullivan Beach	January 12	3	18	Yes	1:06pm	26	0	Lower	Diloma concamerata	Wet	32.1	Centre	Edge	36.4	Edge	East	26.2	Flat	Centre	31.7	10.2	4.3	-5.9	-0.4	-4.3	5.9	0.4
OSullivan Beach	January 12	3	19	Yes	1:08pm	26	0	Lower	Diloma concamerata	Dry	31.5	East	Edge	40.7	Flat	Centre	30.2	Flat	Centre	35.2	10.5	9.2	-1.3	3.7	-9.2	1.3	-3.7
OSullivan Beach	January 12	3	21	No	1:11pm	26	0	Lower	Diloma concamerata	Wet	29	Centre	Flat	34.3	Flat	West	26.9	Flat	Centre	30.7	7.4	5.3	-2.1	1.7	-5.3	2.1	-1.7
OSullivan Beach	January 12	3	24	No	1:16pm	26	0	Lower	Diloma concamerata	Wet	32.8	Centre	Flat	37.1	Edge	West	29.7	Drop	Centre	33.6	7.4	4.3	-3.1	0.8	-4.3	3.1	-0.8
OSullivan Beach	January 12	3	25	Yes	1:17pm	26	0	Lower	Diloma concamerata	Dry	33.7	East	Edge	37.6	Flat	Centre	30.7	Flat	West	34.9	6.9	3.9	-3	1.2	-3.9	3	-1.2
OSullivan Beach	January 12	3	27	No	1:22pm	26	0	Lower	Diloma concamerata	Dry	30.7	East	Edge	32.4	Edge	Centre	25	Flat	West	28.8	7.4	1.7	-5.7	-1.9	-1.7	5.7	1.9
OSullivan Beach	January 12	3	31	No	1:35pm	27	4	Lower	Diloma concamerata	Wet	33.8	Centre	Flat	39.2	Flat	West	28.3	Flat	East	33.1	10.9	5.4	-5.5	-0.7	-5.4	5.5	0.7
OSullivan Beach	January 12	3	33	No	1:38pm	27	4	Lower	Diloma concamerata	Dry	30.1	Centre	Flat	36.3	Edge	Centre	29.6	Flat	East	32.9	6.7	6.2	-0.5	2.8	-6.2	0.5	-2.8
OSullivan Beach	January 12	3	38	Yes	1:47pm	27	4	Lower	Diloma concamerata	Wet	33.4	East	Flat	35.8	Flat	East	26.7	Peak	West	31	9.1	2.4	-6.7	-2.4	-2.4	6.7	2.4
OSullivan Beach	January 12	3	39	Yes	1:48pm	27	4	Lower	Diloma concamerata	Dry	36.8	Centre	Flat	39.4	Edge	West	33.9	Flat	Centre	36.5	5.5	2.6	-2.9	-0.3	-2.6	2.9	0.3
OSullivan Beach	January 12	3	41	No	1:52pm	27	4	Lower	Diloma concamerata	Wet	31.2	Centre	Flat	35.9	Edge	West	28	Flat	Centre	31.8	7.9	4.7	-3.2	0.6	-4.7	3.2	-0.6
OSullivan Beach	January 12	3	42	Yes	1:53pm	27	4	Lower	Diloma concamerata	Dry	30.5	Centre	Flat	33.9	Edge	West	28.6	Flat	Centre	30.8	5.3	3.4	-1.9	0.3	-3.4	1.9	-0.3
OSullivan Beach	January 12	3	43	No	1:54pm	27	4	Lower	Diloma concamerata	Wet	33	Centre	Flat	38.9	Edge	East	30.7	Flat	Centre	34.4	8.2	5.9	-2.3	1.4	-5.9	2.3	-1.4
OSullivan Beach	January 12	3	45	Yes	1:58pm	27	4	Lower	Diloma concamerata	Dry	31.4	East	Drop	37.3	Depression	West	27.7	Flat	East	33.6	9.6	5.9	-3.7	2.2	-5.9	3.7	-2.2
OSullivan Beach	January 12	3	46	Yes	1:59pm	27	4	Lower	Diloma concamerata	Wet	32.8	East	Drop	40	Flat	West	31.9	Flat	East	35.6	8.1	7.2	-0.9	2.8	-7.2	0.9	-2.8
OSullivan Beach	January 12	3	47	Yes	2:02pm	27	4	Lower	Diloma concamerata	Wet	32.3	East	Depression	40.2	Flat	West	30.2	Edge	East	34.7	10	7.9	-2.1	2.4	-7.9	2.1	-2.4
OSullivan Beach	January 12	3	48	Yes	2:04pm	27	4	Lower	Diloma concamerata	Wet	32.2	West	Depression	37.8	Depression	West	30.8	Flat	East	33.5	7	5.6	-1.4	1.3	-5.6	1.4	-1.3
OSullivan Beach	January 12	3	49	No	2:06pm	27	2	Lower	Diloma concamerata	Wet	34.6	Centre	Flat	40.1	Flat	East	31.2	Flat	Centre	34.6	8.9	5.5	-3.4	0	-5.5	3.4	0
OSullivan Beach	January 12	3	50	Yes	2:09pm	27	2	Lower	Diloma concamerata	Wet	35.8	West	Drop	39.4	Depression	Centre	31.9	Depression	East	35.6	7.5	3.6	-3.9	-0.2	-3.6	3.9	0.2
OSullivan Beach	January 12	3	51	Yes	2:11pm	27	2	Lower	Diloma concamerata	Wet	30.4	West	Edge	37.8	Edge	East	29.8	Flat	West	33.1	8	7.4	-0.6	2.7	-7.4	0.6	-2.7
OSullivan Beach	January 12	3	52	Yes	2:13pm	27	2	Lower	Diloma concamerata	Wet	31.4	Centre	Flat	35.3	Flat	Centre	29.9	Flat	Centre	32.1	5.4	3.9	-1.5	0.7	-3.9	1.5	-0.7
OSullivan Beach	January 12	3	1	Yes	12:35pm	26	0	Lower	Bembicium nanum	Dry	36.5	Centre	Flat	38.6	Edge	West	33.6	Flat	Centre	35.7	5	2.1	-2.9	-0.8	-2.1	2.9	0.8
OSullivan Beach	January 12	3	22	Yes	1:12pm	26	0	Lower	Bembicium nanum	Dry	35.3	East	Flat	38.5	Depression	Centre	26.7	Flat	Centre	31.7	11.8	3.2	-8.6	-3.6	-3.2	8.6	3.6
OSullivan Beach	January 12	3	23	No	1:14pm	26	0	Lower	Bembicium nanum	Dry	36	Centre	Flat	39.2	Flat	West	29.8	Flat	East	34.4	9.4	3.2	-6.2	-1.6	-3.2	6.2	1.6
OSullivan Beach	January 12	3	34	Yes	1:39pm	27	4	Lower	Bembicium nanum	Dry	35.1	Centre	Flat	43.2	Edge	West	34.3	Flat	Centre	38	8.9	8.1	-0.8	2.9	-8.1	0.8	-2.9
OSullivan Beach	January 12	3	36	Yes	1:43pm	27	4	Lower	Bembicium nanum	Dry	36.8	Centre	Flat	42.7	Flat	West	35	Flat	East	38.1	7.7	5.9	-1.8	1.3	-5.9	1.8	-1.3
OSullivan Beach	January 12	3	40	Yes	1:50pm	27	4	Lower	Bembicium nanum	Dry	41.4	East	Flat	43.1	Edge	Centre	36.8	Flat	East	39.6	6.3	1.7	-4.6	-1.8	-1.7	4.6	1.8
OSullivan Beach	January 12	3	44	Yes	1:56pm	27	4	Lower	Bembicium nanum	Dry	38.5	Centre	Flat	39.8	Flat	East	33.8	Edge	West	36.6	6	1.3	-4.7	-1.9	-1.3	4.7	1.9
OSullivan Beach	January 12	3	53	Yes	2:26pm	28	0	Upper	Bembicium nanum	Dry	40	East	Flat	43.4	Depression	West	34.2	Flat	Centre	39.3	9.2	3.4	-5.8	-0.7	-3.4	5.8	0.7
OSullivan Beach	January 12	3	54	Yes	2:27pm	28	0	Upper	Bembicium nanum	Dry	39.3	East	Depression	43.4	Edge	West	34.8	Flat	Centre	39	8.6	4.1	-4.5	-0.3	-4.1	4.5	0.3
OSullivan Beach	January 12	3	55	Yes	2:28pm	28	0	Upper	Bembicium nanum	Dry	40.1	Centre	Flat	43.4	Edge	East	35.5	Flat	Centre	39.2	7.9	3.3	-4.6	-0.9	-3.3	4.6	0.9
OSullivan Beach	January 12	3	56	Yes	2:30pm	28	0	Upper	Bembicium nanum	Dry	35.9	East	Flat	40.2	Edge	West	31.1	Depression	Centre	35.6	9.1	4.3	-4.8	-0.3	-4.3	4.8	0.3
OSullivan Beach	January 12	3	57	Yes	2:31pm	28	0	Upper	Bembicium nanum	Dry	37.5	East	Depression	40.3	Flat	West	35.4	Flat	Centre	37.5	4.9	2.8	-2.1	0	-2.8	2.1	0
OSullivan Beach	January 12	3	58	Yes	2:32pm	28	0	Upper	Bembicium nanum	Dry	38.6	East	Flat	43.5	Depression	West	37.3	Flat	Centre	39.8	6.2	4.9	-1.3	1.2	-4.9	1.3	-1.2
OSullivan Beach	January 12	3	59	Yes	2:33pm	28	0	Upper	Bembicium nanum	Dry	36.6	Centre	Flat	43.5	Edge	Centre	35.8	Flat	Centre	39.2	7.7	6.9	-0.8	2.6	-6.9	0.8	-2.6
OSullivan Beach	January 12	3	60	Yes	2:35pm	28	0	Upper	Bembicium nanum	Dry	36.1	Centre	Flat	41.2	Flat	East	32.3	Flat	Centre	35.9	8.9	5.1	-3.8	-0.2	-5.1	3.8	0.2
OSullivan Beach	January 12	3	61	Yes	2:37pm	28	0	Upper	Bembicium nanum	Dry	37.8	Centre	Flat	41.8	Edge	Centre	33.5	Flat	Centre	37.3	8.3	4	-4.3	-0.5	-4	4.3	0.5
OSullivan Beach	January 12	3	62	Yes	2:38pm	28	0	Upper	Bembicium nanum	Dry	41.1	East	Depression	42.3	Edge	East	30.9	Flat	Centre	36.8	11.4	1.2	-10.2	-4.3	-1.2	10.2	4.3
OSullivan Beach	January 12	3	63	Yes	2:39pm	28	0	Upper	Bembicium nanum	Dry	38	Centre	Flat	40.8	Flat	East	28.3	Flat	Centre	34.2	12.5	2.8	-9.7	-3.8	-2.8	9.7	3.8
OSullivan Beach	January 12	3	64	Yes	2:40pm	28	0	Upper	Bembicium nanum	Dry	38.1	Centre	Flat	43	Flat	Centre	33.3	Flat	East	37.6	9.7	4.9	-4.8	-0.5	-4.9	4.8	0.5
OSullivan Beach	January 12	3	65	Yes	2:41pm	28	0	Upper	Bembicium nanum	Dry	38.9	Centre	Flat	39.6	Flat	Centre	33.4	Flat	East	36.8	6.2	0.7	-5.5	-2.1	-0.7	5.5	2.1
OSullivan Beach	January 12	3	66	Yes	2:43pm	28	0	Upper	Bembicium nanum	Dry	39.6	West	Edge	42.1	Edge	West	32.2	Flat	East	36.1	9.9	2.5	-7.4	-3.5	-2.5	7.4	3.5
OSullivan Beach	January 12	3	67	Yes	2:44pm	28	0	Upper	Bembicium nanum	Dry	37.3	East	Flat	41.5	Flat	Centre	35.8	Flat	East	38.5	5.7	4.2	-1.5	1.2	-4.2	1.5	-1.2
OSullivan Beach	January 12	3	68	Yes	2:46pm	28	0	Upper	Bembicium nanum	Dry	37.2	Centre	Flat	42.2	Edge	West	34.3	Flat	Centre	37.7	7.9	5	-2.9	0.5	-5	2.9	-0.5
OSullivan Beach	January 12	3	69	Yes	2:48pm	28	0	Upper	Bembicium nanum	Dry	36.1	East	Flat	40.6	Depression	East	35.4	Flat	Centre	37.2	5.2	4.5	-0.7	1.1	-4.5	0.7	-1.1
OSullivan Beach	January 12	3	70	Yes	2:49pm	28	0	Upper	Bembicium nanum	Dry	36.7	East	Flat	41.7	Flat	West	35	Flat	Centre	37.8	6.7	5	-1.7	1.1	-5	1.7	-1.1
OSullivan Beach	January 12	3	71	Yes	2:51pm	28	0	Upper	Bembicium nanum	Dry	38.9	East	Flat	44.4	Edge	East	36.2	Flat	Centre	38.9	8.2	5.5	-2.7	0	-5.5	2.7	0
OSullivan Beach	January 12	3	72	Yes	2:53pm	28	0	Upper	Bembicium nanum	Dry	35.4	East	Flat	38	Depression	Centre	30.7	Depression	Centre	34.1	7.3	2.6	-4.7	-1.3	-2.6	4.7	1.3
OSullivan Beach	January 12	3	73	Yes	2:54pm	28	0	Upper	Bembicium nanum	Dry	38.3	Centre	Flat	44.3	Depression	West	33.6	Flat	Centre	37.9	10.7	6	-4.7	-0.4	-6	4.7	0.4
OSullivan Beach	January 12	3	74	Yes	2:55pm	28	0	Upper	Bembicium nanum	Dry	38.1	East	Flat	44.1	Flat	West	36.2	Flat	East	39.5	7.9	6	-1.9	1.4	-6	1.9	-1.4
OSullivan Beach	January 12	3	75	Yes	2:58pm	28	0	Upper	Bembicium nanum	Dry	34.4	Centre	Flat	38	Edge	East	28.8	Depression	Centre	33.6	9.2	3.6	-5.6	-0.8	-3.6	5.6	0.8
OSullivan Beach	January 16	6	1	Yes	2:40pm	34	0	Lower	Nerita atramentosa	Wet	39.7	Centre	Edge	43.2	Edge	Centre	30.9	Flat	East	35.4	12.3	3.5	-8.8	-4.3	-3.5	8.8	4.3
OSullivan Beach	January 16	6	2	Yes	2:42pm	34	0	Lower	Nerita atramentosa	Dry	33.8	Centre	Flat	39.9	Edge	Centre	31.6	Edge	West	35.6	8.3	6.1	-2.2	1.8	-6.1	2.2	-1.8
OSullivan Beach	January 16	6	3	Yes	2:43pm	34	0	Lower	Nerita atramentosa	Wet	36.6	West	Drop	39.8	Flat	West	33.8	Flat	Centre	37.3	6	3.2	-2.8	0.7	-3.2	2.8	-0.7
OSullivan Beach	January 16	6	4	Yes	2:44pm	34	0	Lower	Nerita atramentosa	Wet	33.7	West	Edge	39.1	Edge	West	30.9	Peak	East	34.6	8.2	5.4	-2.8	0.9	-5.4	2.8	-0.9
OSullivan Beach	January 16	6	5	Yes	2:46pm	34	0	Lower	Nerita atramentosa	Wet	35.2	East	Flat	39.3	Edge	West	30.5	Flat	East	35.4	8.8	4.1	-4.7	0.2	-4.1	4.7	-0.2
OSullivan Beach	January 16	6	6	Yes	2:47pm	34	0	Lower	Nerita atramentosa	Wet	38.1	West	Flat	40.7	Edge	West	34.7	Flat	Centre	38.2	6	2.6	-3.4	0.1	-2.6	3.4	-0.1
OSullivan Beach	January 16	6	7	Yes	2:50pm	34	0	Lower	Nerita atramentosa	Wet	36	Centre	Depression	41	Edge	West	32.8	Flat	Centre	36.4	8.2	5	-3.2	0.4	-5	3.2	-0.4
OSullivan Beach	January 16	6	9	Yes	2:56pm	34	0	Lower	Nerita atramentosa	Wet	35	Centre	Flat	39.7	Edge	West	31.4	Flat	East	34.8	8.3	4.7	-3.6	-0.2	-4.7	3.6	0.2
OSullivan Beach	January 16	6	10	Yes	2:58pm	34	0	Lower	Nerita atramentosa	Wet	35.9	Centre	Flat	43.4	Edge	East	32.3	Flat	West	37.1	11.1	7.5	-3.6	1.2	-7.5	3.6	-1.2
OSullivan Beach	January 16	6	11	Yes	3:00pm	34	0	Lower	Nerita atramentosa	Dry	36.3	Centre	Flat	41.2	Depression	Centre	31.2	Flat	Centre	36.4	10	4.9	-5.1	0.1	-4.9	5.1	-0.1
OSullivan Beach	January 16	6	12	Yes	3:01pm	34	0	Lower	Nerita atramentosa	Wet	37	West	Edge	40.5	Flat	East	31.9	Flat	Centre	36.5	8.6	3.5	-5.1	-0.5	-3.5	5.1	0.5
OSullivan Beach	January 16	6	15	Yes	3:06pm	34	0	Lower	Nerita atramentosa	Wet	33.8	Centre	Flat	41.8	Depression	Centre	33.1	Peak	Centre	37.6	8.7	8	-0.7	3.8	-8	0.7	-3.8
OSullivan Beach	January 16	6	16	Yes	3:08pm	34	0	Lower	Nerita atramentosa	Dry	38.2	Centre	Flat	42.3	Edge	West	34.2	Depression	Centre	38.3	8.1	4.1	-4	0.1	-4.1	4	-0.1
OSullivan Beach	January 16	6	17	Yes	3:09pm	34	0	Lower	Nerita atramentosa	Wet	36	East	Edge	44.1	Flat	Centre	33.6	Depression	East	38.5	10.5	8.1	-2.4	2.5	-8.1	2.4	-2.5
OSullivan Beach	January 16	6	19	Yes	3:16pm	34	0	Lower	Nerita atramentosa	Dry	38.3	East	Flat	46.2	Depression	West	35.8	Flat	East	43	10.4	7.9	-2.5	4.7	-7.9	2.5	-4.7
OSullivan Beach	January 16	6	21	Yes	3:18pm	34	0	Lower	Nerita atramentosa	Dry	37.4	Centre	Flat	44.1	Flat	East	35.2	Flat	Centre	38.9	8.9	6.7	-2.2	1.5	-6.7	2.2	-1.5
OSullivan Beach	January 16	6	22	Yes	3:19pm	34	0	Lower	Nerita atramentosa	Dry	36.6	Centre	Flat	39.8	Flat	Centre	30.2	Flat	Centre	35.8	9.6	3.2	-6.4	-0.8	-3.2	6.4	0.8
OSullivan Beach	January 16	6	25	Yes	3:31pm	33	0	Lower	Nerita atramentosa	Dry	36.8	Centre	Drop	38.2	Edge	West	32.1	Peak	Centre	35.5	6.1	1.4	-4.7	-1.3	-1.4	4.7	1.3
OSullivan Beach	January 16	6	27	Yes	3:35pm	33	0	Lower	Nerita atramentosa	Dry	34.3	Centre	Flat	41	Edge	West	32.4	Peak	Centre	36.2	8.6	6.7	-1.9	1.9	-6.7	1.9	-1.9
OSullivan Beach	January 16	6	28	Yes	3:36pm	33	0	Lower	Nerita atramentosa	Wet	36.7	Centre	Flat	39.4	Drop	Centre	32.6	Flat	Centre	36.7	6.8	2.7	-4.1	0	-2.7	4.1	0
OSullivan Beach	January 16	6	29	Yes	3:37pm	33	0	Lower	Nerita atramentosa	Wet	32.5	Centre	Flat	40.7	Depression	West	28.9	Flat	Centre	34.4	11.8	8.2	-3.6	1.9	-8.2	3.6	-1.9
OSullivan Beach	January 16	6	30	Yes	3:38pm	33	0	Lower	Nerita atramentosa	Wet	34.7	East	Edge	38.2	Edge	East	32.2	Flat	East	36.1	6	3.5	-2.5	1.4	-3.5	2.5	-1.4
OSullivan Beach	January 16	6	31	Yes	3:39pm	33	0	Lower	Nerita atramentosa	Dry	39.3	East	Flat	44.7	Depression	Centre	36.1	Depression	East	40.3	8.6	5.4	-3.2	1	-5.4	3.2	-1
OSullivan Beach	January 16	6	35	Yes	3:48pm	33	0	Lower	Nerita atramentosa	Wet	39.3	East	Flat	44.8	Edge	West	34.5	Flat	Centre	38.4	10.3	5.5	-4.8	-0.9	-5.5	4.8	0.9
OSullivan Beach	January 16	6	36	Yes	3:49pm	33	0	Lower	Nerita atramentosa	Wet	38.4	Centre	Flat	45.9	Depression	Centre	33.7	Flat	East	39.5	12.2	7.5	-4.7	1.1	-7.5	4.7	-1.1
OSullivan Beach	January 16	6	37	Yes	4:07pm	33	0	Lower	Nerita atramentosa	Wet	25.2	East	Edge	31.8	Flat	Centre	21.7	Flat	East	26.9	10.1	6.6	-3.5	1.7	-6.6	3.5	-1.7
OSullivan Beach	January 16	6	40	Yes	4:11pm	33	0	Lower	Nerita atramentosa	Wet	35.3	West	Edge	39.6	Edge	Centre	32.7	Depression	Centre	35.8	6.9	4.3	-2.6	0.5	-4.3	2.6	-0.5
OSullivan Beach	January 16	6	41	Yes	4:13pm	33	0	Lower	Nerita atramentosa	Dry	36.9	Centre	Drop	44.1	Depression	East	33.9	Peak	Centre	38.7	10.2	7.2	-3	1.8	-7.2	3	-1.8
OSullivan Beach	January 16	6	42	Yes	4:14pm	33	0	Lower	Nerita atramentosa	Wet	33	West	Flat	37.4	Flat	East	30.8	Flat	Centre	34.1	6.6	4.4	-2.2	1.1	-4.4	2.2	-1.1
OSullivan Beach	January 16	6	59	Yes	4:41pm	33	0	Upper	Nerita atramentosa	Wet	35.6	Centre	Flat	39.7	Flat	West	32.3	Flat	East	36.3	7.4	4.1	-3.3	0.7	-4.1	3.3	-0.7
OSullivan Beach	January 16	6	4	No	2:44pm	34	0	Lower	Diloma concamerata	Wet	34.7	West	Edge	39.1	Edge	West	30.9	Peak	East	34.6	8.2	4.4	-3.8	-0.1	-4.4	3.8	0.1
OSullivan Beach	January 16	6	5	No	2:46pm	34	0	Lower	Diloma concamerata	Wet	34.8	Centre	Flat	39.5	Edge	West	31	Flat	East	35.4	8.5	4.7	-3.8	0.6	-4.7	3.8	-0.6
OSullivan Beach	January 16	6	7	No	2:50pm	34	0	Lower	Diloma concamerata	Wet	36.3	West	Edge	41	Edge	West	32.8	Flat	Centre	36.4	8.2	4.7	-3.5	0.1	-4.7	3.5	-0.1
OSullivan Beach	January 16	6	9	No	2:56pm	34	0	Lower	Diloma concamerata	Wet	34.4	Centre	Flat	39.7	Edge	West	31.4	Flat	East	34.8	8.3	5.3	-3	0.4	-5.3	3	-0.4
OSullivan Beach	January 16	6	10	No	2:58pm	34	0	Lower	Diloma concamerata	Wet	36.8	Centre	Flat	43.4	Edge	East	32.3	Flat	West	37.1	11.1	6.6	-4.5	0.3	-6.6	4.5	-0.3
OSullivan Beach	January 16	6	13	Yes	3:03pm	34	0	Lower	Diloma concamerata	Wet	33.8	East	Flat	40.1	Edge	West	29.1	Flat	Centre	34.6	11	6.3	-4.7	0.8	-6.3	4.7	-0.8
OSullivan Beach	January 16	6	14	Yes	3:05pm	34	0	Lower	Diloma concamerata	Wet	34.4	West	Flat	37.5	Edge	West	30.4	Flat	Centre	33.9	7.1	3.1	-4	-0.5	-3.1	4	0.5
OSullivan Beach	January 16	6	15	No	3:06pm	34	0	Lower	Diloma concamerata	Wet	35.1	West	Edge	42.4	Depression	East	33.1	Flat	East	37.6	9.3	7.3	-2	2.5	-7.3	2	-2.5
OSullivan Beach	January 16	6	18	Yes	3:11pm	34	0	Lower	Diloma concamerata	Dry	36.3	Centre	Flat	39.7	Edge	West	32.9	Flat	Centre	35.8	6.8	3.4	-3.4	-0.5	-3.4	3.4	0.5
OSullivan Beach	January 16	6	23	Yes	3:27pm	33	0	Lower	Diloma concamerata	Wet	33.4	Centre	Drop	38.3	Edge	Centre	31	Flat	Centre	34.7	7.3	4.9	-2.4	1.3	-4.9	2.4	-1.3
OSullivan Beach	January 16	6	24	Yes	3:30pm	33	0	Lower	Diloma concamerata	Wet	33.7	West	Edge	42.8	Flat	East	33.1	Flat	West	37.6	9.7	9.1	-0.6	3.9	-9.1	0.6	-3.9
OSullivan Beach	January 16	6	25	No	3:31pm	33	0	Lower	Diloma concamerata	Dry	34.8	Centre	Peak	38	Edge	West	32.6	Flat	Centre	35.5	5.4	3.2	-2.2	0.7	-3.2	2.2	-0.7
OSullivan Beach	January 16	6	26	Yes	3:32pm	33	0	Lower	Diloma concamerata	Wet	32.9	Centre	Flat	41.5	Edge	West	30.7	Flat	East	35.5	10.8	8.6	-2.2	2.6	-8.6	2.2	-2.6
OSullivan Beach	January 16	6	29	No	3:37pm	33	0	Lower	Diloma concamerata	Wet	31.4	East	Flat	42.7	Depression	West	28.9	Flat	Centre	34.4	13.8	11.3	-2.5	3	-11.3	2.5	-3
OSullivan Beach	January 16	6	35	No	3:48pm	33	0	Lower	Diloma concamerata	Wet	37.5	East	Flat	44.8	Edge	West	34.5	Flat	Centre	38.4	10.3	7.3	-3	0.9	-7.3	3	-0.9
OSullivan Beach	January 16	6	36	No	3:49pm	33	0	Lower	Diloma concamerata	Wet	37.2	Centre	Flat	45.9	Depression	Centre	33.7	Flat	East	39.5	12.2	8.7	-3.5	2.3	-8.7	3.5	-2.3
OSullivan Beach	January 16	6	37	No	4:07pm	33	0	Lower	Diloma concamerata	Wet	25.7	Centre	Flat	31.8	Flat	Centre	21.8	Peak	East	26.9	10	6.1	-3.9	1.2	-6.1	3.9	-1.2
OSullivan Beach	January 16	6	38	Yes	4:09pm	33	0	Lower	Diloma concamerata	Wet	35.3	West	Flat	42.6	Edge	East	33.9	Flat	West	38.5	8.7	7.3	-1.4	3.2	-7.3	1.4	-3.2
OSullivan Beach	January 16	6	39	Yes	4:10pm	33	0	Lower	Diloma concamerata	Wet	34.2	East	Edge	35.9	Edge	Centre	31.8	Peak	Centre	33.8	4.1	1.7	-2.4	-0.4	-1.7	2.4	0.4
OSullivan Beach	January 16	6	42	No	4:14pm	33	0	Lower	Diloma concamerata	Wet	33.3	Centre	Flat	37.4	Flat	East	30.8	Flat	Centre	34.1	6.6	4.1	-2.5	0.8	-4.1	2.5	-0.8
OSullivan Beach	January 16	6	59	No	4:41pm	33	0	Upper	Diloma concamerata	Wet	34.9	East	Flat	39.7	Flat	West	32.3	Flat	East	36.3	7.4	4.8	-2.6	1.4	-4.8	2.6	-1.4
OSullivan Beach	January 16	6	61	Yes	4:45pm	33	0	Upper	Diloma concamerata	Wet	36	East	Flat	44.3	Flat	West	32.8	Edge	East	38.9	11.5	8.3	-3.2	2.9	-8.3	3.2	-2.9
OSullivan Beach	January 16	6	30	No	3:38pm	33	0	Lower	Diloma concamerata	Wet	36.1	Centre	Flat	38.2	Edge	East	32.2	Flat	East	36.1	6	2.1	-3.9	0	-2.1	3.9	0
OSullivan Beach	January 16	6	40	No	4:11pm	33	0	Lower	Diloma concamerata	Wet	35.9	Centre	Flat	39.6	Edge	Centre	32.7	Depression	East	35.8	6.9	3.7	-3.2	-0.1	-3.7	3.2	0.1
OSullivan Beach	January 16	6	8	Yes	2:54pm	34	0	Lower	Bembicium nanum	Dry	37.1	Centre	Flat	42.4	Edge	Centre	30.3	Flat	Centre	35.8	12.1	5.3	-6.8	-1.3	-5.3	6.8	1.3
OSullivan Beach	January 16	6	27	No	3:35pm	33	0	Lower	Bembicium nanum	Dry	36.2	East	Edge	41	Depression	East	32.3	Flat	Centre	36.2	8.7	4.8	-3.9	0	-4.8	3.9	0
OSullivan Beach	January 16	6	32	Yes	3:40pm	33	0	Lower	Bembicium nanum	Dry	44.1	Centre	Drop	47.3	Edge	West	37.6	Flat	East	42.5	9.7	3.2	-6.5	-1.6	-3.2	6.5	1.6
OSullivan Beach	January 16	6	33	Yes	3:41pm	33	0	Lower	Bembicium nanum	Dry	41	East	Flat	47.5	Depression	West	38.3	Flat	West	42.5	9.2	6.5	-2.7	1.5	-6.5	2.7	-1.5
OSullivan Beach	January 16	6	43	Yes	4:17pm	33	0	Upper	Bembicium nanum	Dry	43.9	Centre	Flat	50.6	Depression	West	40.2	Drop	East	44.9	10.4	6.7	-3.7	1	-6.7	3.7	-1
OSullivan Beach	January 16	6	45	Yes	4:19pm	33	0	Upper	Bembicium nanum	Dry	41.3	East	Flat	47.2	Edge	Centre	39.2	Flat	Centre	41.9	8	5.9	-2.1	0.6	-5.9	2.1	-0.6
OSullivan Beach	January 16	6	46	Yes	4:21pm	33	0	Upper	Bembicium nanum	Dry	45.2	Centre	Edge	47.8	Flat	Centre	38.1	Flat	East	43.8	9.7	2.6	-7.1	-1.4	-2.6	7.1	1.4
OSullivan Beach	January 16	6	47	Yes	4:22pm	33	0	Upper	Bembicium nanum	Dry	46.7	Centre	Edge	47.3	Flat	East	42.7	Flat	Centre	44.7	4.6	0.6	-4	-2	-0.6	4	2
OSullivan Beach	January 16	6	48	Yes	4:23pm	33	0	Upper	Bembicium nanum	Dry	41.8	West	Edge	47.1	Edge	West	37.7	Edge	West	41.6	9.4	5.3	-4.1	-0.2	-5.3	4.1	0.2
OSullivan Beach	January 16	6	49	Yes	4:24pm	33	0	Upper	Bembicium nanum	Dry	42.7	Centre	Flat	46.6	Flat	Centre	35.9	Flat	East	41.5	10.7	3.9	-6.8	-1.2	-3.9	6.8	1.2
OSullivan Beach	January 16	6	50	Yes	4:26pm	33	0	Upper	Bembicium nanum	Dry	41.2	Centre	Flat	48	Flat	West	37.4	Flat	East	40.6	10.6	6.8	-3.8	-0.6	-6.8	3.8	0.6
OSullivan Beach	January 16	6	51	Yes	4:28pm	33	0	Upper	Bembicium nanum	Dry	40.4	Centre	Flat	46.2	Flat	West	34.9	Flat	East	39.1	11.3	5.8	-5.5	-1.3	-5.8	5.5	1.3
OSullivan Beach	January 16	6	52	Yes	4:29pm	33	0	Upper	Bembicium nanum	Dry	41.4	Centre	Edge	43.2	Edge	Centre	36.1	Flat	Centre	39.4	7.1	1.8	-5.3	-2	-1.8	5.3	2
OSullivan Beach	January 16	6	53	Yes	4:31pm	33	0	Upper	Bembicium nanum	Dry	40.6	East	Flat	48.3	Edge	East	38.2	Edge	West	42.4	10.1	7.7	-2.4	1.8	-7.7	2.4	-1.8
OSullivan Beach	January 16	6	54	Yes	4:33pm	33	0	Upper	Bembicium nanum	Dry	41.4	West	Flat	44.4	Edge	West	34.6	Depression	East	39.3	9.8	3	-6.8	-2.1	-3	6.8	2.1
OSullivan Beach	January 16	6	55	Yes	4:35pm	33	0	Upper	Bembicium nanum	Dry	42.1	East	Edge	45.4	Flat	Centre	36.1	Flat	East	41	9.3	3.3	-6	-1.1	-3.3	6	1.1
OSullivan Beach	January 16	6	56	Yes	4:37pm	33	0	Upper	Bembicium nanum	Dry	44.8	East	Flat	52.2	Edge	West	41.6	Depression	East	46.3	10.6	7.4	-3.2	1.5	-7.4	3.2	-1.5
OSullivan Beach	January 16	6	57	Yes	4:39pm	33	0	Upper	Bembicium nanum	Dry	44.8	West	Edge	50.5	Flat	East	37.8	Flat	East	43.6	12.7	5.7	-7	-1.2	-5.7	7	1.2
OSullivan Beach	January 16	6	58	Yes	4:40pm	33	0	Upper	Bembicium nanum	Dry	47.7	Centre	Flat	50.7	Edge	Centre	41.3	Flat	Centre	45.3	9.4	3	-6.4	-2.4	-3	6.4	2.4
OSullivan Beach	January 16	6	60	Yes	4:44pm	33	0	Upper	Bembicium nanum	Dry	41.1	Centre	Flat	46.7	Depression	Centre	37.9	Flat	East	41.6	8.8	5.6	-3.2	0.5	-5.6	3.2	-0.5
OSullivan Beach	January 16	6	62	Yes	4:47pm	33	0	Upper	Bembicium nanum	Dry	46.3	Centre	Depression	51.3	Edge	West	37.9	Depression	West	44.8	13.4	5	-8.4	-1.5	-5	8.4	1.5
OSullivan Beach	January 16	6	63	Yes	4:50pm	33	0	Upper	Bembicium nanum	Dry	44	East	Edge	44.3	Flat	Centre	36	Flat	Centre	39.8	8.3	0.3	-8	-4.2	-0.3	8	4.2
OSullivan Beach	January 16	6	64	Yes	4:51pm	33	0	Upper	Bembicium nanum	Dry	38.5	Centre	Flat	46.3	Edge	West	36.7	Flat	Centre	40.2	9.6	7.8	-1.8	1.7	-7.8	1.8	-1.7
OSullivan Beach	January 16	6	65	Yes	4:52pm	33	0	Upper	Bembicium nanum	Dry	39.6	Centre	Flat	48.4	Flat	Centre	35.8	Flat	Centre	42.1	12.6	8.8	-3.8	2.5	-8.8	3.8	-2.5
OSullivan Beach	January 16	6	66	Yes	4:54pm	33	0	Upper	Bembicium nanum	Dry	44.1	East	Flat	48.5	Depression	West	39.8	Flat	Centre	42.7	8.7	4.4	-4.3	-1.4	-4.4	4.3	1.4
OSullivan Beach	January 16	6	67	Yes	4:55pm	33	0	Upper	Bembicium nanum	Dry	42.1	West	Flat	47.2	Depression	Centre	35.4	Flat	East	40.7	11.8	5.1	-6.7	-1.4	-5.1	6.7	1.4
OSullivan Beach	January 16	6	68	Yes	4:57pm	33	0	Upper	Bembicium nanum	Dry	37.5	East	Edge	41.3	Depression	East	32	Peak	Centre	36.2	9.3	3.8	-5.5	-1.3	-3.8	5.5	1.3
OSullivan Beach	January 16	6	69	Yes	4:59pm	33	0	Upper	Bembicium nanum	Dry	40.7	Centre	Flat	45.3	Flat	West	35.6	Flat	Centre	41.6	9.7	4.6	-5.1	0.9	-4.6	5.1	-0.9
OSullivan Beach	January 16	6	16	No	3:08pm	34	0	Lower	Bembicium nanum	Dry	39.4	Centre	Depression	43	Edge	West	34.2	Depression	Centre	38.3	8.8	3.6	-5.2	-1.1	-3.6	5.2	1.1
OSullivan Beach	January 16	6	31	No	3:39pm	33	0	Lower	Bembicium nanum	Dry	39	East	Flat	45.8	Edge	West	36.1	Depression	East	40.3	9.7	6.8	-2.9	1.3	-6.8	2.9	-1.3
Marino Rocks	January 17	8	1	Yes	1:55pm	39	0	Lower	Nerita atramentosa	Wet	31.8	Centre	Edge	41.8	Edge	East	30.4	Flat	Centre	33.1	11.4	10	-1.4	1.3	-10	1.4	-1.3
Marino Rocks	January 17	8	3	Yes	2:03pm	39	0	Lower	Nerita atramentosa	Wet	33.4	Centre	Flat	40.4	Depression	West	30.9	Peak	Centre	35.1	9.5	7	-2.5	1.7	-7	2.5	-1.7
Marino Rocks	January 17	8	5	Yes	2:07pm	39	0	Lower	Nerita atramentosa	Wet	36.2	Centre	Flat	43.6	Edge	Centre	34.2	Peak	Centre	36.9	9.4	7.4	-2	0.7	-7.4	2	-0.7
Marino Rocks	January 17	8	6	Yes	2:10pm	39	0	Lower	Nerita atramentosa	Wet	35.4	West	Flat	44.3	Edge	West	33.5	Flat	Centre	36.6	10.8	8.9	-1.9	1.2	-8.9	1.9	-1.2
Marino Rocks	January 17	8	7	Yes	2:14pm	39	0	Lower	Nerita atramentosa	Wet	35.2	East	Flat	44.7	Edge	West	32.6	Flat	Centre	37.2	12.1	9.5	-2.6	2	-9.5	2.6	-2
Marino Rocks	January 17	8	8	Yes	2:16pm	39	0	Lower	Nerita atramentosa	Wet	38.1	East	Edge	45.2	Edge	West	36	Flat	Centre	38.7	9.2	7.1	-2.1	0.6	-7.1	2.1	-0.6
Marino Rocks	January 17	8	9	Yes	2:18pm	39	0	Lower	Nerita atramentosa	Wet	32.2	Centre	Edge	42.9	Edge	Centre	29.3	Flat	Centre	34.8	13.6	10.7	-2.9	2.6	-10.7	2.9	-2.6
Marino Rocks	January 17	8	10	Yes	2:20pm	39	0	Lower	Nerita atramentosa	Wet	36.2	East	Flat	45.9	Edge	West	32.9	Flat	East	38.7	13	9.7	-3.3	2.5	-9.7	3.3	-2.5
Marino Rocks	January 17	8	11	Yes	2:22pm	39	0	Lower	Nerita atramentosa	Wet	35.6	West	Edge	45.6	Edge	Centre	33	Peak	Centre	38.5	12.6	10	-2.6	2.9	-10	2.6	-2.9
Marino Rocks	January 17	8	12	Yes	2:24pm	39	0	Lower	Nerita atramentosa	Wet	37.8	Centre	Flat	46.3	Edge	West	34.1	Flat	Centre	37.7	12.2	8.5	-3.7	-0.1	-8.5	3.7	0.1
Marino Rocks	January 17	8	14	Yes	2:31pm	39	0	Lower	Nerita atramentosa	Wet	35.6	East	Flat	41.8	Edge	East	30.7	Flat	Centre	33.6	11.1	6.2	-4.9	-2	-6.2	4.9	2
Marino Rocks	January 17	8	15	Yes	2:32pm	39	0	Lower	Nerita atramentosa	Wet	38.1	Centre	Flat	42.8	Flat	East	36.1	Flat	East	39.5	6.7	4.7	-2	1.4	-4.7	2	-1.4
Marino Rocks	January 17	8	16	Yes	2:37pm	39	0	Lower	Nerita atramentosa	Wet	37.8	West	Edge	41.5	Edge	East	36.3	Flat	West	38.2	5.2	3.7	-1.5	0.4	-3.7	1.5	-0.4
Marino Rocks	January 17	8	17	Yes	2:39pm	39	0	Lower	Nerita atramentosa	Wet	33.3	East	Depression	47.3	Edge	Centre	31	Flat	Centre	36.6	16.3	14	-2.3	3.3	-14	2.3	-3.3
Marino Rocks	January 17	8	18	Yes	2:40pm	39	0	Lower	Nerita atramentosa	Wet	36.5	Centre	Flat	45.1	Edge	Centre	34.5	Peak	East	39.9	10.6	8.6	-2	3.4	-8.6	2	-3.4
Marino Rocks	January 17	8	21	Yes	2:49pm	39	0	Lower	Nerita atramentosa	Wet	40.2	East	Flat	43.3	Edge	West	37.8	Flat	Centre	39.6	5.5	3.1	-2.4	-0.6	-3.1	2.4	0.6
Marino Rocks	January 17	8	22	Yes	2:50pm	39	0	Lower	Nerita atramentosa	Wet	34.1	East	Edge	47.7	Edge	Centre	32.3	Flat	Centre	38.2	15.4	13.6	-1.8	4.1	-13.6	1.8	-4.1
Marino Rocks	January 17	8	23	Yes	2:54pm	39	0	Lower	Nerita atramentosa	Wet	34.6	Centre	Flat	43.6	Edge	West	33	Flat	Centre	36.5	10.6	9	-1.6	1.9	-9	1.6	-1.9
Marino Rocks	January 17	8	24	Yes	2:55pm	39	0	Lower	Nerita atramentosa	Wet	35	Centre	Edge	44.8	Edge	West	34.1	Flat	East	38.2	10.7	9.8	-0.9	3.2	-9.8	0.9	-3.2
Marino Rocks	January 17	8	25	Yes	2:57pm	39	0	Lower	Nerita atramentosa	Wet	37.5	Centre	Edge	43.1	Edge	West	35.1	Flat	Centre	38	8	5.6	-2.4	0.5	-5.6	2.4	-0.5
Marino Rocks	January 17	8	28	Yes	3:11pm	39	0	Lower	Nerita atramentosa	Wet	34.6	Centre	Edge	44.3	Edge	East	30.9	Flat	West	36.3	13.4	9.7	-3.7	1.7	-9.7	3.7	-1.7
Marino Rocks	January 17	8	29	Yes	3:16pm	39	0	Lower	Nerita atramentosa	Wet	35.4	East	Flat	42.3	Edge	East	34	Flat	West	37.1	8.3	6.9	-1.4	1.7	-6.9	1.4	-1.7
Marino Rocks	January 17	8	35	Yes	3:44pm	39	0	Lower	Nerita atramentosa	Wet	39.9	East	Flat	41.5	Flat	East	32	Peak	Centre	36.6	9.5	1.6	-7.9	-3.3	-1.6	7.9	3.3
Marino Rocks	January 17	8	36	Yes	3:50pm	39	0	Lower	Nerita atramentosa	Wet	35.9	West	Edge	41.8	Edge	Centre	34.2	Flat	Centre	36.9	7.6	5.9	-1.7	1	-5.9	1.7	-1
Marino Rocks	January 17	8	37	Yes	3:52pm	39	0	Lower	Nerita atramentosa	Wet	38	Centre	Flat	49.3	Edge	West	35.2	Flat	East	41.2	14.1	11.3	-2.8	3.2	-11.3	2.8	-3.2
Marino Rocks	January 17	8	38	Yes	3:54pm	39	0	Lower	Nerita atramentosa	Wet	38.2	Centre	Flat	42.1	Flat	Centre	36.2	Edge	West	38.1	5.9	3.9	-2	-0.1	-3.9	2	0.1
Marino Rocks	January 17	8	39	Yes	3:57pm	39	0	Lower	Nerita atramentosa	Wet	38.3	East	Flat	42.6	Edge	Centre	35.7	Flat	West	39	6.9	4.3	-2.6	0.7	-4.3	2.6	-0.7
Marino Rocks	January 17	8	40	Yes	4:01pm	38	0	Lower	Nerita atramentosa	Wet	38.5	East	Flat	43.6	Edge	West	34.5	Peak	Centre	38.4	9.1	5.1	-4	-0.1	-5.1	4	0.1
Marino Rocks	January 17	8	41	Yes	4:02pm	38	0	Lower	Nerita atramentosa	Wet	35.7	East	Edge	50.5	Edge	West	35.1	Flat	Centre	41	15.4	14.8	-0.6	5.3	-14.8	0.6	-5.3
Marino Rocks	January 17	8	50	Yes	4:31pm	38	0	Upper	Nerita atramentosa	Dry	39.7	Centre	Flat	46.5	Edge	Centre	32.8	Peak	Centre	40.7	13.7	6.8	-6.9	1	-6.8	6.9	-1
Marino Rocks	January 17	8	1	No	1:55pm	39	0	Lower	Diloma concamerata	Wet	33.2	Centre	Flat	41.8	Edge	East	29.6	Edge	West	33.1	12.2	8.6	-3.6	-0.1	-8.6	3.6	0.1
Marino Rocks	January 17	8	2	Yes	2:01pm	39	0	Lower	Diloma concamerata	Wet	34.6	West	Edge	44.2	Edge	West	33.7	Flat	East	37.8	10.5	9.6	-0.9	3.2	-9.6	0.9	-3.2
Marino Rocks	January 17	8	4	Yes	2:05pm	39	0	Lower	Diloma concamerata	Dry	34.2	East	Flat	43.7	Edge	West	33.2	Flat	Centre	37.3	10.5	9.5	-1	3.1	-9.5	1	-3.1
Marino Rocks	January 17	8	9	No	2:18pm	39	0	Lower	Diloma concamerata	Wet	33.4	Centre	Flat	42.9	Edge	Centre	29.3	Flat	Centre	34.8	13.6	9.5	-4.1	1.4	-9.5	4.1	-1.4
Marino Rocks	January 17	8	11	No	2:22pm	39	0	Lower	Diloma concamerata	Wet	37.1	Centre	Flat	45.6	Edge	Centre	33	Flat	Centre	38.5	12.6	8.5	-4.1	1.4	-8.5	4.1	-1.4
Marino Rocks	January 17	8	12	No	2:24pm	39	0	Lower	Diloma concamerata	Wet	37.3	East	Flat	46.3	Edge	West	34.1	Flat	Centre	37.7	12.2	9	-3.2	0.4	-9	3.2	-0.4
Marino Rocks	January 17	8	20	Yes	2:46pm	39	0	Lower	Diloma concamerata	Wet	34.7	Centre	Flat	41	Edge	East	31.6	Flat	West	36.4	9.4	6.3	-3.1	1.7	-6.3	3.1	-1.7
Marino Rocks	January 17	8	22	No	2:50pm	39	0	Lower	Diloma concamerata	Wet	33.7	East	Depression	47.7	Edge	Centre	32	Flat	West	38.2	15.7	14	-1.7	4.5	-14	1.7	-4.5
Marino Rocks	January 17	8	23	No	2:54pm	39	0	Lower	Diloma concamerata	Wet	38.2	West	Flat	43.6	Edge	West	33	Flat	Centre	36.5	10.6	5.4	-5.2	-1.7	-5.4	5.2	1.7
Marino Rocks	January 17	8	25	No	2:57pm	39	0	Lower	Diloma concamerata	Wet	37.4	Centre	Flat	43.1	Edge	West	35.3	Flat	Centre	38	7.8	5.7	-2.1	0.6	-5.7	2.1	-0.6
Marino Rocks	January 17	8	26	Yes	3:07pm	39	0	Lower	Diloma concamerata	Wet	42.2	Centre	Flat	49.9	Edge	West	40.3	Flat	Centre	44.9	9.6	7.7	-1.9	2.7	-7.7	1.9	-2.7
Marino Rocks	January 17	8	27	Yes	3:10pm	39	0	Lower	Diloma concamerata	Wet	34.6	West	Edge	41	Edge	East	33.5	Edge	West	35.9	7.5	6.4	-1.1	1.3	-6.4	1.1	-1.3
Marino Rocks	January 17	8	30	Yes	3:28pm	39	0	Lower	Diloma concamerata	Wet	37.8	East	Flat	41.5	Edge	West	36.2	Flat	Centre	38.1	5.3	3.7	-1.6	0.3	-3.7	1.6	-0.3
Marino Rocks	January 17	8	31	Yes	3:30pm	39	0	Lower	Diloma concamerata	Wet	34.1	East	Flat	43.1	Edge	West	33.1	Flat	East	36.7	10	9	-1	2.6	-9	1	-2.6
Marino Rocks	January 17	8	32	Yes	3:32pm	39	0	Lower	Diloma concamerata	Wet	38	Centre	Peak	48.2	Flat	West	36.2	Peak	East	42.7	12	10.2	-1.8	4.7	-10.2	1.8	-4.7
Marino Rocks	January 17	8	33	Yes	3:33pm	39	0	Lower	Diloma concamerata	Wet	36.8	East	Flat	49.7	Edge	West	36.6	Flat	East	43	13.1	12.9	-0.2	6.2	-12.9	0.2	-6.2
Marino Rocks	January 17	8	34	Yes	3:39pm	39	0	Lower	Diloma concamerata	Wet	37	West	Flat	42.8	Edge	East	32.8	Flat	Centre	37.9	10	5.8	-4.2	0.9	-5.8	4.2	-0.9
Marino Rocks	January 17	8	65	Yes	5:10pm	38	0	Upper	Diloma concamerata	Dry	49.1	Centre	Edge	51.5	Edge	East	44.8	Edge	East	48.4	6.7	2.4	-4.3	-0.7	-2.4	4.3	0.7
Marino Rocks	January 17	8	12	No	2:24pm	39	0	Lower	Bembicium nanum	Wet	38.3	West	Edge	46.3	Edge	West	34.1	Flat	Centre	37.7	12.2	8	-4.2	-0.6	-8	4.2	0.6
Marino Rocks	January 17	8	13	Yes	2:29pm	39	0	Lower	Bembicium nanum	Wet	39.7	East	Edge	40.5	Edge	East	30.5	Peak	West	33.8	10	0.8	-9.2	-5.9	-0.8	9.2	5.9
Marino Rocks	January 17	8	19	Yes	2:44pm	39	0	Lower	Bembicium nanum	Wet	37.7	Centre	Flat	40.4	Edge	West	34.5	Peak	Centre	37.8	5.9	2.7	-3.2	0.1	-2.7	3.2	-0.1
Marino Rocks	January 17	8	40	No	4:01pm	38	0	Lower	Bembicium nanum	Wet	39.5	East	Flat	43.6	Edge	West	34.5	Peak	Centre	38.4	9.1	4.1	-5	-1.1	-4.1	5	1.1
Marino Rocks	January 17	8	42	Yes	4:15pm	38	0	Upper	Bembicium nanum	Dry	42.7	Centre	Flat	49.2	Edge	West	40.5	Flat	Centre	44.1	8.7	6.5	-2.2	1.4	-6.5	2.2	-1.4
Marino Rocks	January 17	8	43	Yes	4:18pm	38	0	Upper	Bembicium nanum	Dry	46.5	Centre	Flat	47.8	Edge	West	45.5	Flat	Centre	47.8	2.3	1.3	-1	1.3	-1.3	1	-1.3
Marino Rocks	January 17	8	44	Yes	4:21pm	38	0	Upper	Bembicium nanum	Dry	45.5	Centre	Flat	50.5	Edge	Centre	39	Edge	Centre	45.4	11.5	5	-6.5	-0.1	-5	6.5	0.1
Marino Rocks	January 17	8	45	Yes	4:24pm	38	0	Upper	Bembicium nanum	Dry	47.9	Centre	Flat	52.7	Edge	West	46.6	Flat	Centre	49.2	6.1	4.8	-1.3	1.3	-4.8	1.3	-1.3
Marino Rocks	January 17	8	46	Yes	4:25pm	38	0	Upper	Bembicium nanum	Dry	49.8	East	Flat	53.1	Edge	Centre	46.8	Flat	East	49.7	6.3	3.3	-3	-0.1	-3.3	3	0.1
Marino Rocks	January 17	8	47	Yes	4:27pm	38	0	Upper	Bembicium nanum	Dry	46.3	Centre	Flat	53.6	Flat	West	43.7	Edge	East	47.9	9.9	7.3	-2.6	1.6	-7.3	2.6	-1.6
Marino Rocks	January 17	8	48	Yes	4:28pm	38	0	Upper	Bembicium nanum	Dry	45.4	Centre	Edge	52.9	Edge	Centre	42.9	Flat	East	47.4	10	7.5	-2.5	2	-7.5	2.5	-2
Marino Rocks	January 17	8	50	No	4:31pm	38	0	Upper	Bembicium nanum	Dry	42.4	Centre	Flat	46.5	Edge	Centre	32.8	Peak	Centre	40.7	13.7	4.1	-9.6	-1.7	-4.1	9.6	1.7
Marino Rocks	January 17	8	52	Yes	4:36pm	38	0	Upper	Bembicium nanum	Dry	50.7	West	Edge	52.1	Edge	West	45.9	Edge	Centre	49	6.2	1.4	-4.8	-1.7	-1.4	4.8	1.7
Marino Rocks	January 17	8	53	Yes	4:38pm	38	0	Upper	Bembicium nanum	Dry	45.4	East	Flat	52.9	Flat	West	43.8	Edge	East	47.8	9.1	7.5	-1.6	2.4	-7.5	1.6	-2.4
Marino Rocks	January 17	8	54	Yes	4:45pm	38	0	Upper	Bembicium nanum	Dry	42.2	East	Flat	49	Edge	West	40.3	Flat	East	43.9	8.7	6.8	-1.9	1.7	-6.8	1.9	-1.7
Marino Rocks	January 17	8	55	Yes	4:46pm	38	0	Upper	Bembicium nanum	Dry	44	East	Flat	50.6	Edge	West	41.3	Flat	East	46.7	9.3	6.6	-2.7	2.7	-6.6	2.7	-2.7
Marino Rocks	January 17	8	56	Yes	4:47pm	38	0	Upper	Bembicium nanum	Dry	41.3	East	Flat	49.5	Edge	West	39.3	Flat	East	43.5	10.2	8.2	-2	2.2	-8.2	2	-2.2
Marino Rocks	January 17	8	57	Yes	4:48pm	38	0	Upper	Bembicium nanum	Dry	49.2	Centre	Flat	51.4	Flat	Centre	43.2	Flat	East	48.1	8.2	2.2	-6	-1.1	-2.2	6	1.1
Marino Rocks	January 17	8	59	Yes	4:53pm	38	0	Upper	Bembicium nanum	Dry	46.7	West	Flat	50	Edge	West	42.2	Flat	East	44.5	7.8	3.3	-4.5	-2.2	-3.3	4.5	2.2
Marino Rocks	January 17	8	60	Yes	4:58pm	38	0	Upper	Bembicium nanum	Dry	46.4	Centre	Flat	51.2	Edge	West	39.3	Peak	East	45.7	11.9	4.8	-7.1	-0.7	-4.8	7.1	0.7
Marino Rocks	January 17	8	61	Yes	5:03pm	38	0	Upper	Bembicium nanum	Dry	47.1	Centre	Flat	48.3	Flat	Centre	38.3	Flat	East	44.1	10	1.2	-8.8	-3	-1.2	8.8	3
Marino Rocks	January 17	8	62	Yes	5:05pm	38	0	Upper	Bembicium nanum	Dry	46.8	Centre	Flat	51.7	Edge	West	43.6	Edge	East	47.6	8.1	4.9	-3.2	0.8	-4.9	3.2	-0.8
Marino Rocks	January 17	8	63	Yes	5:07pm	38	0	Upper	Bembicium nanum	Dry	45.5	Centre	Flat	51.6	Edge	West	44.2	Flat	East	46.9	7.4	6.1	-1.3	1.4	-6.1	1.3	-1.4
Marino Rocks	January 17	8	64	Yes	5:08pm	38	0	Upper	Bembicium nanum	Dry	43.8	Centre	Flat	48	Flat	West	39.2	Flat	East	44.8	8.8	4.2	-4.6	1	-4.2	4.6	-1
Marino Rocks	January 17	8	66	Yes	5:12pm	38	0	Upper	Bembicium nanum	Dry	41.8	East	Flat	49.9	Edge	West	39	Edge	East	44.4	10.9	8.1	-2.8	2.6	-8.1	2.8	-2.6
Marino Rocks	January 17	8	67	Yes	5:13pm	38	0	Upper	Bembicium nanum	Dry	43.3	Centre	Flat	48.9	Edge	West	39.8	Edge	East	44	9.1	5.6	-3.5	0.7	-5.6	3.5	-0.7
Marino Rocks	January 17	8	68	Yes	5:14pm	38	0	Upper	Bembicium nanum	Dry	46.3	West	Edge	49	Edge	West	41.8	Flat	East	45.1	7.2	2.7	-4.5	-1.2	-2.7	4.5	1.2
Marino Rocks	January 17	8	69	Yes	5:15pm	38	0	Upper	Bembicium nanum	Dry	46	Centre	Flat	50.2	Depression	West	41.3	Flat	East	45.1	8.9	4.2	-4.7	-0.9	-4.2	4.7	0.9
Marino Rocks	January 17	8	70	Yes	5:18pm	38	0	Upper	Bembicium nanum	Dry	49.7	West	Flat	52.5	Edge	West	42.3	Flat	East	47.6	10.2	2.8	-7.4	-2.1	-2.8	7.4	2.1
Marino Rocks	January 17	8	71	Yes	5:19pm	38	0	Upper	Bembicium nanum	Dry	44.8	Centre	Flat	48.8	Flat	West	42.3	Flat	West	45	6.5	4	-2.5	0.2	-4	2.5	-0.2
Marino Rocks	January 27	3	1	Yes	12:05pm	25	0	Lower	Nerita atramentosa	Wet	30.3	East	Flat	36.1	Edge	West	25.7	Flat	East	30.3	10.4	5.8	-4.6	0	-5.8	4.6	0
Marino Rocks	January 27	3	2	Yes	12:07pm	25	0	Lower	Nerita atramentosa	Wet	28.9	Centre	Flat	31.9	Edge	West	27.3	Flat	Centre	29.5	4.6	3	-1.6	0.6	-3	1.6	-0.6
Marino Rocks	January 27	3	3	Yes	12:08pm	25	0	Lower	Nerita atramentosa	Wet	27.8	East	Flat	30.2	Edge	East	24	Flat	East	27.1	6.2	2.4	-3.8	-0.7	-2.4	3.8	0.7
Marino Rocks	January 27	3	5	Yes	12:12pm	25	0	Lower	Nerita atramentosa	Wet	29.2	Centre	Flat	35.6	Edge	West	27	Flat	Centre	30.6	8.6	6.4	-2.2	1.4	-6.4	2.2	-1.4
Marino Rocks	January 27	3	6	Yes	12:14pm	25	0	Lower	Nerita atramentosa	Wet	28.9	West	Edge	33.9	Edge	East	26.6	Peak	Centre	29.4	7.3	5	-2.3	0.5	-5	2.3	-0.5
Marino Rocks	January 27	3	7	Yes	12:15pm	25	0	Lower	Nerita atramentosa	Wet	30.1	Centre	Flat	37.8	Edge	Centre	27.3	Flat	Centre	30.9	10.5	7.7	-2.8	0.8	-7.7	2.8	-0.8
Marino Rocks	January 27	3	8	Yes	12:17pm	25	0	Lower	Nerita atramentosa	Dry	32.9	Centre	Flat	39.1	Edge	East	29.7	Flat	West	33.4	9.4	6.2	-3.2	0.5	-6.2	3.2	-0.5
Marino Rocks	January 27	3	9	Yes	12:19pm	25	0	Lower	Nerita atramentosa	Dry	34.8	Centre	Flat	41.2	Edge	Centre	33.1	Flat	Centre	35.6	8.1	6.4	-1.7	0.8	-6.4	1.7	-0.8
Marino Rocks	January 27	3	10	Yes	12:20pm	25	0	Lower	Nerita atramentosa	Wet	28.4	West	Flat	39.6	Edge	Centre	26.5	Flat	West	30.8	13.1	11.2	-1.9	2.4	-11.2	1.9	-2.4
Marino Rocks	January 27	3	11	Yes	12:21pm	25	0	Lower	Nerita atramentosa	Wet	30.7	Centre	Flat	36.7	Edge	West	28.7	Flat	Centre	31.5	8	6	-2	0.8	-6	2	-0.8
Marino Rocks	January 27	3	12	Yes	12:24pm	25	0	Lower	Nerita atramentosa	Wet	30.7	East	Flat	36.3	Edge	West	25.6	Flat	West	30.1	10.7	5.6	-5.1	-0.6	-5.6	5.1	0.6
Marino Rocks	January 27	3	13	Yes	12:25pm	25	0	Lower	Nerita atramentosa	Dry	28.6	Centre	Flat	36.4	Edge	West	26.9	Flat	East	30.2	9.5	7.8	-1.7	1.6	-7.8	1.7	-1.6
Marino Rocks	January 27	3	14	Yes	12:28pm	25	0	Lower	Nerita atramentosa	Wet	32.8	East	Flat	35.9	Edge	East	30.1	Flat	West	32.2	5.8	3.1	-2.7	-0.6	-3.1	2.7	0.6
Marino Rocks	January 27	3	15	Yes	12:29pm	25	0	Lower	Nerita atramentosa	Dry	32.3	Centre	Flat	40	Edge	Centre	27.5	Flat	Centre	32.8	12.5	7.7	-4.8	0.5	-7.7	4.8	-0.5
Marino Rocks	January 27	3	17	Yes	12:33pm	25	0	Lower	Nerita atramentosa	Wet	30.9	Centre	Flat	35.3	Edge	East	29.4	Flat	Centre	32.5	5.9	4.4	-1.5	1.6	-4.4	1.5	-1.6
Marino Rocks	January 27	3	18	Yes	12:35pm	25	0	Lower	Nerita atramentosa	Wet	30.7	East	Flat	36.5	Edge	West	28	Flat	East	31.7	8.5	5.8	-2.7	1	-5.8	2.7	-1
Marino Rocks	January 27	3	19	Yes	12:36pm	25	0	Lower	Nerita atramentosa	Wet	29.9	Centre	Flat	35.3	Edge	West	27.7	Flat	East	31.6	7.6	5.4	-2.2	1.7	-5.4	2.2	-1.7
Marino Rocks	January 27	3	20	Yes	12:41pm	25	0	Lower	Nerita atramentosa	Wet	30.3	West	Edge	37.8	Edge	Centre	28.2	Peak	West	33	9.6	7.5	-2.1	2.7	-7.5	2.1	-2.7
Marino Rocks	January 27	3	21	Yes	12:42pm	25	0	Lower	Nerita atramentosa	Wet	27.8	Centre	Edge	31.9	Flat	East	26.2	Peak	Centre	28.8	5.7	4.1	-1.6	1	-4.1	1.6	-1
Marino Rocks	January 27	3	22	Yes	12:44pm	25	0	Lower	Nerita atramentosa	Wet	29.8	West	Edge	35.5	Edge	Centre	28.3	Flat	East	31.2	7.2	5.7	-1.5	1.4	-5.7	1.5	-1.4
Marino Rocks	January 27	3	25	Yes	12:48pm	25	0	Lower	Nerita atramentosa	Dry	31.1	Centre	Flat	38.4	Edge	East	30	Flat	Centre	33.3	8.4	7.3	-1.1	2.2	-7.3	1.1	-2.2
Marino Rocks	January 27	3	26	Yes	12:51pm	25	0	Lower	Nerita atramentosa	Wet	30.5	East	Edge	39.6	Edge	East	30.5	Edge	East	33.3	9.1	9.1	0	2.8	-9.1	0	-2.8
Marino Rocks	January 27	3	27	Yes	12:53pm	25	0	Lower	Nerita atramentosa	Wet	29.9	Centre	Flat	36.7	Edge	East	28.1	Edge	West	30.3	8.6	6.8	-1.8	0.4	-6.8	1.8	-0.4
Marino Rocks	January 27	3	28	Yes	12:54pm	25	0	Lower	Nerita atramentosa	Wet	29.7	East	Flat	34	Edge	Centre	28	Flat	East	30.7	6	4.3	-1.7	1	-4.3	1.7	-1
Marino Rocks	January 27	3	29	Yes	12:55pm	25	0	Lower	Nerita atramentosa	Dry	32.7	Centre	Flat	36.9	Edge	East	31.3	Flat	Centre	33.5	5.6	4.2	-1.4	0.8	-4.2	1.4	-0.8
Marino Rocks	January 27	3	30	Yes	12:57pm	25	0	Lower	Nerita atramentosa	Wet	29.6	Centre	Edge	35.5	Edge	Centre	28.2	Edge	West	31	7.3	5.9	-1.4	1.4	-5.9	1.4	-1.4
Marino Rocks	January 27	3	31	Yes	12:59pm	25	0	Lower	Nerita atramentosa	Wet	28.7	Centre	Edge	42	Edge	West	26	Flat	Centre	31.6	16	13.3	-2.7	2.9	-13.3	2.7	-2.9
Marino Rocks	January 27	3	33	Yes	1:02pm	25	0	Lower	Nerita atramentosa	Dry	32.2	Centre	Flat	40.3	Edge	Centre	29.6	Flat	Centre	33.3	10.7	8.1	-2.6	1.1	-8.1	2.6	-1.1
Marino Rocks	January 27	3	34	Yes	1:06pm	25	0	Lower	Nerita atramentosa	Wet	33.1	Centre	Flat	38.2	Edge	West	29	Peak	Centre	33.4	9.2	5.1	-4.1	0.3	-5.1	4.1	-0.3
Marino Rocks	January 27	3	35	Yes	1:07pm	25	0	Lower	Nerita atramentosa	Dry	32.5	Centre	Flat	38	Flat	Centre	32.2	Peak	Centre	34.9	5.8	5.5	-0.3	2.4	-5.5	0.3	-2.4
Marino Rocks	January 27	3	2	No	12:07pm	25	0	Lower	Diloma concamerata	Wet	29	East	Edge	33.8	Edge	West	27.3	Flat	Centre	29.5	6.5	4.8	-1.7	0.5	-4.8	1.7	-0.5
Marino Rocks	January 27	3	4	Yes	12:10pm	25	0	Lower	Diloma concamerata	Wet	28.6	Centre	Flat	35.4	Edge	Centre	27.9	Flat	Centre	30.6	7.5	6.8	-0.7	2	-6.8	0.7	-2
Marino Rocks	January 27	3	6	No	12:14pm	25	0	Lower	Diloma concamerata	Wet	29	West	Edge	33.9	Edge	East	26.6	Peak	Centre	29.4	7.3	4.9	-2.4	0.4	-4.9	2.4	-0.4
Marino Rocks	January 27	3	10	No	12:20pm	25	0	Lower	Diloma concamerata	Wet	28.7	West	Edge	39.6	Edge	Centre	26.5	Flat	West	30.8	13.1	10.9	-2.2	2.1	-10.9	2.2	-2.1
Marino Rocks	January 27	3	12	No	12:24pm	25	0	Lower	Diloma concamerata	Wet	26	West	Flat	36.3	Edge	West	25.6	Flat	Centre	30.1	10.7	10.3	-0.4	4.1	-10.3	0.4	-4.1
Marino Rocks	January 27	3	16	Yes	12:31pm	25	0	Lower	Diloma concamerata	Wet	31.8	Centre	Flat	39.1	Edge	West	27.6	Flat	Centre	32.7	11.5	7.3	-4.2	0.9	-7.3	4.2	-0.9
Marino Rocks	January 27	3	18	No	12:35pm	25	0	Lower	Diloma concamerata	Wet	31.3	Centre	Flat	36.5	Edge	West	28	Flat	East	31.7	8.5	5.2	-3.3	0.4	-5.2	3.3	-0.4
Marino Rocks	January 27	3	20	No	12:41pm	25	0	Lower	Diloma concamerata	Wet	30.4	West	Edge	37.8	Edge	Centre	28.2	Peak	West	33	9.6	7.4	-2.2	2.6	-7.4	2.2	-2.6
Marino Rocks	January 27	3	26	No	12:51pm	25	0	Lower	Diloma concamerata	Wet	33.8	Centre	Flat	39.6	Edge	East	30.5	Flat	East	33.3	9.1	5.8	-3.3	-0.5	-5.8	3.3	0.5
Marino Rocks	January 27	3	29	No	12:55pm	25	0	Lower	Diloma concamerata	Dry	33.2	Centre	Flat	36.9	Flat	East	31.3	Flat	Centre	33.5	5.6	3.7	-1.9	0.3	-3.7	1.9	-0.3
Marino Rocks	January 27	3	32	Yes	1:01pm	25	0	Lower	Diloma concamerata	Dry	30.5	Centre	Flat	37.2	Edge	Centre	29.2	Flat	East	32.5	8	6.7	-1.3	2	-6.7	1.3	-2
Marino Rocks	January 27	3	34	No	1:06pm	25	0	Lower	Diloma concamerata	Wet	32.9	Centre	Flat	38.2	Edge	West	29	Peak	Centre	33.4	9.2	5.3	-3.9	0.5	-5.3	3.9	-0.5
Marino Rocks	January 27	3	36	Yes	1:17pm	26	0	Lower	Diloma concamerata	Dry	35.9	Centre	Flat	41.3	Edge	West	32.1	Flat	East	36.5	9.2	5.4	-3.8	0.6	-5.4	3.8	-0.6
Marino Rocks	January 27	3	37	Yes	1:19pm	26	0	Lower	Diloma concamerata	Wet	29.9	West	Flat	36.2	Flat	East	28.1	Flat	West	32.5	8.1	6.3	-1.8	2.6	-6.3	1.8	-2.6
Marino Rocks	January 27	3	39	Yes	1:22pm	26	0	Lower	Diloma concamerata	Wet	32.7	Centre	Flat	35.4	Edge	East	29.1	Flat	Centre	31.6	6.3	2.7	-3.6	-1.1	-2.7	3.6	1.1
Marino Rocks	January 27	3	40	Yes	1:24pm	26	0	Lower	Diloma concamerata	Dry	34.1	West	Flat	39.4	Edge	Centre	31.2	Flat	East	34.6	8.2	5.3	-2.9	0.5	-5.3	2.9	-0.5
Marino Rocks	January 27	3	41	Yes	1:26pm	26	0	Lower	Diloma concamerata	Wet	30.8	Centre	Edge	34.3	Edge	West	28.9	Peak	Centre	30.9	5.4	3.5	-1.9	0.1	-3.5	1.9	-0.1
Marino Rocks	January 27	3	42	Yes	1:32pm	26	0	Lower	Diloma concamerata	Wet	30.4	East	Flat	37.1	Edge	West	29.3	Flat	Centre	32.4	7.8	6.7	-1.1	2	-6.7	1.1	-2
Marino Rocks	January 27	3	44	Yes	1:45pm	26	0	Lower	Diloma concamerata	Wet	29.7	Centre	Flat	35.3	Edge	Centre	28.9	Flat	Centre	31.6	6.4	5.6	-0.8	1.9	-5.6	0.8	-1.9
Marino Rocks	January 27	3	45	Yes	1:46pm	26	0	Lower	Diloma concamerata	Wet	30.3	Centre	Flat	37.5	Edge	West	28.3	Flat	Centre	31.9	9.2	7.2	-2	1.6	-7.2	2	-1.6
Marino Rocks	January 27	3	46	Yes	1:49pm	26	0	Lower	Diloma concamerata	Wet	31.8	Centre	Flat	40.6	Edge	Centre	31	Flat	East	33.9	9.6	8.8	-0.8	2.1	-8.8	0.8	-2.1
Marino Rocks	January 27	3	47	Yes	1:53pm	26	0	Lower	Diloma concamerata	Wet	28.8	East	Flat	36.3	Edge	Centre	27.7	Edge	West	31	8.6	7.5	-1.1	2.2	-7.5	1.1	-2.2
Marino Rocks	January 27	3	48	Yes	1:55pm	26	0	Lower	Diloma concamerata	Wet	34.5	Centre	Flat	37.1	Edge	Centre	31.1	Flat	West	33.9	6	2.6	-3.4	-0.6	-2.6	3.4	0.6
Marino Rocks	January 27	3	49	Yes	1:57pm	26	0	Lower	Diloma concamerata	Wet	33.3	East	Peak	38.6	Edge	West	32	Flat	East	35.5	6.6	5.3	-1.3	2.2	-5.3	1.3	-2.2
Marino Rocks	January 27	3	51	Yes	2:00pm	26	0	Lower	Diloma concamerata	Wet	30.9	East	Flat	34.3	Flat	West	29.7	Flat	Centre	32.1	4.6	3.4	-1.2	1.2	-3.4	1.2	-1.2
Marino Rocks	January 27	3	52	Yes	2:01pm	26	0	Lower	Diloma concamerata	Wet	34.2	Centre	Flat	38.2	Edge	Centre	33.3	Flat	Centre	35.8	4.9	4	-0.9	1.6	-4	0.9	-1.6
Marino Rocks	January 27	3	53	Yes	2:03pm	26	0	Lower	Diloma concamerata	Dry	33.3	Centre	Flat	38.9	Edge	West	31.4	Flat	Centre	34.6	7.5	5.6	-1.9	1.3	-5.6	1.9	-1.3
Marino Rocks	January 27	3	55	Yes	2:07pm	26	0	Lower	Diloma concamerata	Dry	31.9	Centre	Edge	40.3	Edge	Centre	29.4	Flat	West	34	10.9	8.4	-2.5	2.1	-8.4	2.5	-2.1
Marino Rocks	January 27	3	57	Yes	2:10pm	26	0	Lower	Diloma concamerata	Dry	32.4	Centre	Flat	40.6	Edge	East	30.7	Flat	Centre	34.5	9.9	8.2	-1.7	2.1	-8.2	1.7	-2.1
Marino Rocks	January 27	3	58	Yes	2:14pm	26	0	Lower	Diloma concamerata	Dry	33.2	Centre	Flat	39.4	Edge	West	31.9	Flat	Centre	34.4	7.5	6.2	-1.3	1.2	-6.2	1.3	-1.2
Marino Rocks	January 27	3	1	No	12:05pm	25	0	Lower	Bembicium nanum	Wet	33.4	West	Flat	36.1	Edge	West	26.3	Flat	East	30.3	9.8	2.7	-7.1	-3.1	-2.7	7.1	3.1
Marino Rocks	January 27	3	23	Yes	12:46pm	25	0	Lower	Bembicium nanum	Dry	31.2	Centre	Flat	36.3	Edge	Centre	29.6	Flat	Centre	32.1	6.7	5.1	-1.6	0.9	-5.1	1.6	-0.9
Marino Rocks	January 27	3	24	Yes	12:47pm	25	0	Lower	Bembicium nanum	Dry	39	East	Flat	40.2	Edge	East	35.1	Flat	Centre	36.8	5.1	1.2	-3.9	-2.2	-1.2	3.9	2.2
Marino Rocks	January 27	3	38	Yes	1:21pm	26	0	Lower	Bembicium nanum	Dry	39.7	Centre	Flat	43.9	Edge	Centre	34.1	Flat	Centre	38.9	9.8	4.2	-5.6	-0.8	-4.2	5.6	0.8
Marino Rocks	January 27	3	50	Yes	1:58pm	26	0	Lower	Bembicium nanum	Dry	34.3	Centre	Flat	38	Edge	West	30.8	Flat	Centre	33.5	7.2	3.7	-3.5	-0.8	-3.7	3.5	0.8
Marino Rocks	January 27	3	54	Yes	2:05pm	26	0	Lower	Bembicium nanum	Dry	38.6	East	Edge	40.4	Flat	West	33.1	Flat	Centre	36.4	7.3	1.8	-5.5	-2.2	-1.8	5.5	2.2
Marino Rocks	January 27	3	56	Yes	2:08pm	26	0	Lower	Bembicium nanum	Dry	34.4	Centre	Flat	40.1	Edge	West	32.3	Peak	East	35.5	7.8	5.7	-2.1	1.1	-5.7	2.1	-1.1
Marino Rocks	January 27	3	59	Yes	2:28pm	26	0	Upper	Bembicium nanum	Dry	38	West	Flat	40.8	Edge	Centre	30.4	Flat	Centre	35.1	10.4	2.8	-7.6	-2.9	-2.8	7.6	2.9
Marino Rocks	January 27	3	60	Yes	2:30pm	26	0	Upper	Bembicium nanum	Dry	37.9	Centre	Peak	44.2	Edge	Centre	36.8	Flat	Centre	39.7	7.4	6.3	-1.1	1.8	-6.3	1.1	-1.8
Marino Rocks	January 27	3	61	Yes	2:32pm	26	0	Upper	Bembicium nanum	Dry	40.6	Centre	Flat	45.7	Edge	West	35.2	Edge	East	39.6	10.5	5.1	-5.4	-1	-5.1	5.4	1
Marino Rocks	January 27	3	62	Yes	2:34pm	26	0	Upper	Bembicium nanum	Dry	41.6	Centre	Flat	45.8	Edge	Centre	36.9	Flat	Centre	40.6	8.9	4.2	-4.7	-1	-4.2	4.7	1
Marino Rocks	January 27	3	63	Yes	2:37pm	26	0	Upper	Bembicium nanum	Dry	35.7	Centre	Flat	42.8	Edge	East	34.1	Flat	Centre	37.4	8.7	7.1	-1.6	1.7	-7.1	1.6	-1.7
Marino Rocks	January 27	3	64	Yes	2:39pm	26	0	Upper	Bembicium nanum	Dry	39.2	Centre	Edge	44.9	Depression	Centre	35.3	Flat	Centre	38.8	9.6	5.7	-3.9	-0.4	-5.7	3.9	0.4
Marino Rocks	January 27	3	65	Yes	2:41pm	26	0	Upper	Bembicium nanum	Dry	36.7	Centre	Flat	43.6	Edge	West	34.5	Flat	Centre	37.6	9.1	6.9	-2.2	0.9	-6.9	2.2	-0.9
Marino Rocks	January 27	3	66	Yes	2:42pm	26	0	Upper	Bembicium nanum	Dry	37.8	Centre	Drop	40.2	Depression	Centre	33.1	Flat	Centre	37.1	7.1	2.4	-4.7	-0.7	-2.4	4.7	0.7
Marino Rocks	January 27	3	67	Yes	2:45pm	26	0	Upper	Bembicium nanum	Dry	40.1	Centre	Flat	45.3	Depression	West	38.1	Flat	Centre	40.8	7.2	5.2	-2	0.7	-5.2	2	-0.7
Marino Rocks	January 27	3	68	Yes	2:47pm	26	0	Upper	Bembicium nanum	Dry	35	Centre	Flat	40.9	Edge	West	33.3	Flat	Centre	36.1	7.6	5.9	-1.7	1.1	-5.9	1.7	-1.1
Marino Rocks	January 27	3	69	Yes	2:49pm	26	0	Upper	Bembicium nanum	Dry	43.7	Centre	Edge	44.4	Edge	West	35.7	Flat	Centre	39.1	8.7	0.7	-8	-4.6	-0.7	8	4.6
Marino Rocks	January 27	3	70	Yes	2:51pm	26	0	Upper	Bembicium nanum	Dry	38.2	East	Edge	46.5	Edge	West	37.2	Flat	East	40.5	9.3	8.3	-1	2.3	-8.3	1	-2.3
Marino Rocks	January 27	3	71	Yes	2:54pm	26	0	Upper	Bembicium nanum	Dry	41	West	Flat	42.7	Flat	West	37.8	Flat	East	40	4.9	1.7	-3.2	-1	-1.7	3.2	1
Marino Rocks	January 27	3	72	Yes	2:57pm	26	0	Upper	Bembicium nanum	Dry	38	Centre	Flat	44.1	Flat	East	33	Flat	West	38.5	11.1	6.1	-5	0.5	-6.1	5	-0.5
Marino Rocks	January 27	3	73	Yes	2:59pm	26	0	Upper	Bembicium nanum	Dry	40.1	Centre	Flat	45.7	Depression	East	38.3	Flat	Centre	41.9	7.4	5.6	-1.8	1.8	-5.6	1.8	-1.8
Marino Rocks	January 27	3	74	Yes	3:00pm	26	0	Upper	Bembicium nanum	Dry	38.6	Centre	Flat	44.8	Flat	West	35.6	Edge	Centre	40.6	9.2	6.2	-3	2	-6.2	3	-2
Marino Rocks	January 27	3	75	Yes	3:06pm	27	0	Upper	Bembicium nanum	Dry	33.9	East	Flat	45.4	Edge	West	30.4	Flat	East	36.8	15	11.5	-3.5	2.9	-11.5	3.5	-2.9
Marino Rocks	January 27	3	76	Yes	3:07pm	27	0	Upper	Bembicium nanum	Dry	38.5	West	Flat	41.5	Edge	West	34.3	Flat	East	36.7	7.2	3	-4.2	-1.8	-3	4.2	1.8
Marino Rocks	January 27	3	77	Yes	3:09pm	27	0	Upper	Bembicium nanum	Dry	36.4	Centre	Flat	42.6	Edge	West	33	Flat	Centre	36.7	9.6	6.2	-3.4	0.3	-6.2	3.4	-0.3
Marino Rocks	January 27	3	78	Yes	3:11pm	27	0	Upper	Bembicium nanum	Dry	35.3	East	Edge	43.8	Flat	West	34.5	Edge	East	39.4	9.3	8.5	-0.8	4.1	-8.5	0.8	-4.1
Marino Rocks	January 27	3	79	Yes	3:13pm	27	0	Upper	Bembicium nanum	Dry	36.3	East	Edge	41.9	Edge	West	33.5	Flat	East	36.6	8.4	5.6	-2.8	0.3	-5.6	2.8	-0.3
Marino Rocks	January 27	3	80	Yes	3:14pm	27	0	Upper	Bembicium nanum	Dry	40.1	East	Flat	46.6	Edge	West	39	Flat	East	41.8	7.6	6.5	-1.1	1.7	-6.5	1.1	-1.7
Marino Rocks	January 27	3	20	No	12:41pm	25	0	Lower	Bembicium nanum	Wet	30.8	West	Flat	37.8	Edge	Centre	28.2	Peak	West	33	9.6	7	-2.6	2.2	-7	2.6	-2.2
Marino Rocks	January 28	5	1	Yes	12:15pm	27	0	Lower	Nerita atramentosa	Wet	28.8	Centre	Flat	34.9	Flat	Centre	27.8	Flat	Centre	30.1	7.1	6.1	-1	1.3	-6.1	1	-1.3
Marino Rocks	January 28	5	2	Yes	12:17pm	27	0	Lower	Nerita atramentosa	Wet	29.4	Centre	Flat	36.5	Edge	East	28.8	Flat	Centre	30.7	7.7	7.1	-0.6	1.3	-7.1	0.6	-1.3
Marino Rocks	January 28	5	3	Yes	12:19pm	27	0	Lower	Nerita atramentosa	Wet	30.8	Centre	Flat	34.8	Edge	East	29.3	Flat	Centre	31.4	5.5	4	-1.5	0.6	-4	1.5	-0.6
Marino Rocks	January 28	5	4	Yes	12:20pm	27	0	Lower	Nerita atramentosa	Wet	29.7	Centre	Flat	40	Edge	East	27.7	Flat	Centre	32.3	12.3	10.3	-2	2.6	-10.3	2	-2.6
Marino Rocks	January 28	5	5	Yes	12:21pm	27	0	Lower	Nerita atramentosa	Wet	30.7	East	Edge	42.8	Edge	West	27	Flat	Centre	33.1	15.8	12.1	-3.7	2.4	-12.1	3.7	-2.4
Marino Rocks	January 28	5	6	Yes	12:25pm	27	0	Lower	Nerita atramentosa	Wet	35.3	Centre	Edge	44.1	Edge	East	32.2	Flat	West	35.7	11.9	8.8	-3.1	0.4	-8.8	3.1	-0.4
Marino Rocks	January 28	5	7	Yes	12:26pm	27	0	Lower	Nerita atramentosa	Wet	29.8	Centre	Flat	38.1	Edge	East	29.2	Flat	Centre	32.4	8.9	8.3	-0.6	2.6	-8.3	0.6	-2.6
Marino Rocks	January 28	5	8	Yes	12:29pm	27	0	Lower	Nerita atramentosa	Wet	30.8	East	Depression	35.4	Edge	East	25.8	Flat	Centre	29	9.6	4.6	-5	-1.8	-4.6	5	1.8
Marino Rocks	January 28	5	9	Yes	12:30pm	27	0	Lower	Nerita atramentosa	Wet	32.7	West	Edge	33.7	Edge	West	29.4	Flat	Centre	30.8	4.3	1	-3.3	-1.9	-1	3.3	1.9
Marino Rocks	January 28	5	10	Yes	12:32pm	27	0	Lower	Nerita atramentosa	Wet	31.2	East	Flat	40.2	Edge	Centre	27.9	Flat	East	33.3	12.3	9	-3.3	2.1	-9	3.3	-2.1
Marino Rocks	January 28	5	11	Yes	12:33pm	27	0	Lower	Nerita atramentosa	Wet	30	East	Flat	34.3	Edge	Centre	28.4	Flat	East	30.4	5.9	4.3	-1.6	0.4	-4.3	1.6	-0.4
Marino Rocks	January 28	5	12	Yes	12:34pm	27	0	Lower	Nerita atramentosa	Wet	29.4	Centre	Edge	33.5	Edge	West	26.3	Flat	East	28.8	7.2	4.1	-3.1	-0.6	-4.1	3.1	0.6
Marino Rocks	January 28	5	13	Yes	12:37pm	27	0	Lower	Nerita atramentosa	Wet	31.8	Centre	Flat	42.2	Edge	East	30.3	Flat	Centre	34.3	11.9	10.4	-1.5	2.5	-10.4	1.5	-2.5
Marino Rocks	January 28	5	14	Yes	12:38pm	27	0	Lower	Nerita atramentosa	Dry	33.4	Centre	Flat	39.7	Edge	East	30.6	Flat	Centre	33.8	9.1	6.3	-2.8	0.4	-6.3	2.8	-0.4
Marino Rocks	January 28	5	16	Yes	12:40pm	27	0	Lower	Nerita atramentosa	Dry	32.3	Centre	Flat	40.6	Edge	East	30.5	Flat	West	33.9	10.1	8.3	-1.8	1.6	-8.3	1.8	-1.6
Marino Rocks	January 28	5	17	Yes	12:41pm	27	0	Lower	Nerita atramentosa	Wet	31	East	Flat	37.6	Edge	West	28.7	Flat	East	34.2	8.9	6.6	-2.3	3.2	-6.6	2.3	-3.2
Marino Rocks	January 28	5	18	Yes	12:43pm	27	0	Lower	Nerita atramentosa	Wet	27.6	Centre	Flat	39.3	Edge	East	25.8	Edge	West	32	13.5	11.7	-1.8	4.4	-11.7	1.8	-4.4
Marino Rocks	January 28	5	19	Yes	12:45pm	27	0	Lower	Nerita atramentosa	Wet	31.2	West	Flat	37.6	Edge	Centre	29.4	Flat	Centre	32.7	8.2	6.4	-1.8	1.5	-6.4	1.8	-1.5
Marino Rocks	January 28	5	20	Yes	12:47pm	27	0	Lower	Nerita atramentosa	Wet	30.3	Centre	Flat	37	Edge	East	28.8	Flat	Centre	32.1	8.2	6.7	-1.5	1.8	-6.7	1.5	-1.8
Marino Rocks	January 28	5	23	Yes	12:55pm	27	0	Lower	Nerita atramentosa	Wet	32.7	Centre	Flat	39.6	Edge	West	32.1	Flat	West	35.2	7.5	6.9	-0.6	2.5	-6.9	0.6	-2.5
Marino Rocks	January 28	5	24	Yes	1:02pm	27	0	Lower	Nerita atramentosa	Wet	32.3	Centre	Flat	40.9	Edge	East	30.2	Flat	Centre	33.5	10.7	8.6	-2.1	1.2	-8.6	2.1	-1.2
Marino Rocks	January 28	5	25	Yes	1:06pm	27	0	Lower	Nerita atramentosa	Wet	30.3	Centre	Edge	36.2	Edge	Centre	28.7	Peak	Centre	32.4	7.5	5.9	-1.6	2.1	-5.9	1.6	-2.1
Marino Rocks	January 28	5	26	Yes	1:08pm	27	0	Lower	Nerita atramentosa	Wet	31.3	Centre	Flat	42.7	Depression	Centre	30.8	Flat	Centre	35.3	11.9	11.4	-0.5	4	-11.4	0.5	-4
Marino Rocks	January 28	5	28	Yes	1:11pm	27	0	Lower	Nerita atramentosa	Wet	31.2	West	Edge	39.4	Edge	East	30.3	Flat	West	33.7	9.1	8.2	-0.9	2.5	-8.2	0.9	-2.5
Marino Rocks	January 28	5	29	Yes	1:20pm	28	0	Lower	Nerita atramentosa	Wet	36.1	Centre	Flat	44.6	Edge	East	32.3	Flat	Centre	37	12.3	8.5	-3.8	0.9	-8.5	3.8	-0.9
Marino Rocks	January 28	5	30	Yes	1:22pm	28	0	Lower	Nerita atramentosa	Wet	32	Centre	Flat	38	Edge	Centre	30	Flat	West	32.7	8	6	-2	0.7	-6	2	-0.7
Marino Rocks	January 28	5	32	Yes	1:24pm	28	0	Lower	Nerita atramentosa	Dry	33.5	Centre	Edge	35	Edge	West	30.8	Flat	Centre	33.6	4.2	1.5	-2.7	0.1	-1.5	2.7	-0.1
Marino Rocks	January 28	5	33	Yes	1:29pm	28	0	Lower	Nerita atramentosa	Wet	32.2	West	Flat	35.5	Edge	West	29	Flat	Centre	32.2	6.5	3.3	-3.2	0	-3.3	3.2	0
Marino Rocks	January 28	5	34	Yes	1:33pm	28	0	Lower	Nerita atramentosa	Wet	33.2	Centre	Flat	37.4	Edge	West	30.5	Flat	Centre	33.3	6.9	4.2	-2.7	0.1	-4.2	2.7	-0.1
Marino Rocks	January 28	5	38	Yes	2:03pm	28	0	Lower	Nerita atramentosa	Wet	34.3	Centre	Flat	38.5	Edge	West	32.4	Flat	East	34.1	6.1	4.2	-1.9	-0.2	-4.2	1.9	0.2
Marino Rocks	January 28	5	1	No	12:15pm	27	0	Lower	Diloma concamerata	Wet	29.5	Centre	Edge	34.9	Flat	Centre	27.8	Flat	Centre	30.1	7.1	5.4	-1.7	0.6	-5.4	1.7	-0.6
Marino Rocks	January 28	5	6	No	12:25pm	27	0	Lower	Diloma concamerata	Wet	33.6	Centre	Flat	44.1	Edge	East	32.2	Flat	West	35.7	11.9	10.5	-1.4	2.1	-10.5	1.4	-2.1
Marino Rocks	January 28	5	10	No	12:32pm	27	0	Lower	Diloma concamerata	Wet	29.7	Centre	Flat	40.2	Edge	Centre	27.9	Flat	East	33.3	12.3	10.5	-1.8	3.6	-10.5	1.8	-3.6
Marino Rocks	January 28	5	12	No	12:34pm	27	0	Lower	Diloma concamerata	Wet	29	East	Edge	33.5	Edge	West	26.3	Flat	East	28.8	7.2	4.5	-2.7	-0.2	-4.5	2.7	0.2
Marino Rocks	January 28	5	15	Yes	12:39pm	27	0	Lower	Diloma concamerata	Wet	32.6	Centre	Flat	39.1	Edge	West	32	Flat	Centre	34.5	7.1	6.5	-0.6	1.9	-6.5	0.6	-1.9
Marino Rocks	January 28	5	21	Yes	12:48pm	27	0	Lower	Diloma concamerata	Dry	34.5	Centre	Flat	41.5	Edge	Centre	29.6	Edge	Centre	34.7	11.9	7	-4.9	0.2	-7	4.9	-0.2
Marino Rocks	January 28	5	22	Yes	12:50pm	27	0	Lower	Diloma concamerata	Dry	33.5	West	Edge	38.5	Edge	East	32.3	Flat	Centre	35	6.2	5	-1.2	1.5	-5	1.2	-1.5
Marino Rocks	January 28	5	24	No	1:02pm	27	0	Lower	Diloma concamerata	Wet	33.5	Centre	Flat	40.9	Depression	East	30.2	Flat	East	33.5	10.7	7.4	-3.3	0	-7.4	3.3	0
Marino Rocks	January 28	5	27	Yes	1:10pm	27	0	Lower	Diloma concamerata	Wet	35.4	Centre	Flat	45.5	Edge	West	32.3	Flat	Centre	38	13.2	10.1	-3.1	2.6	-10.1	3.1	-2.6
Marino Rocks	January 28	5	33	No	1:29pm	28	0	Lower	Diloma concamerata	Wet	32	Centre	Flat	35.5	Edge	West	29	Flat	Centre	32.2	6.5	3.5	-3	0.2	-3.5	3	-0.2
Marino Rocks	January 28	5	34	No	1:33pm	28	0	Lower	Diloma concamerata	Wet	30.3	Centre	Flat	37.4	Edge	West	30.3	Flat	Centre	33.3	7.1	7.1	0	3	-7.1	0	-3
Marino Rocks	January 28	5	35	Yes	1:37pm	28	0	Lower	Diloma concamerata	Wet	32.8	East	Edge	38.8	Edge	Centre	31.3	Flat	Centre	34.1	7.5	6	-1.5	1.3	-6	1.5	-1.3
Marino Rocks	January 28	5	36	Yes	1:41pm	28	0	Lower	Diloma concamerata	Wet	35.7	Centre	Flat	42.4	Edge	West	33	Flat	East	37	9.4	6.7	-2.7	1.3	-6.7	2.7	-1.3
Marino Rocks	January 28	5	37	Yes	1:43pm	28	0	Lower	Diloma concamerata	Wet	34.5	Centre	Flat	45	Edge	East	30.9	Flat	West	35.6	14.1	10.5	-3.6	1.1	-10.5	3.6	-1.1
Marino Rocks	January 28	5	38	No	2:03pm	28	0	Lower	Diloma concamerata	Wet	33.2	East	Edge	38.5	Edge	West	32.4	Flat	West	34.1	6.1	5.3	-0.8	0.9	-5.3	0.8	-0.9
Marino Rocks	January 28	5	39	Yes	2:07pm	28	0	Lower	Diloma concamerata	Wet	33.7	Centre	Flat	40.1	Edge	West	32.3	Flat	East	35.3	7.8	6.4	-1.4	1.6	-6.4	1.4	-1.6
Marino Rocks	January 28	5	40	Yes	2:08pm	28	0	Lower	Diloma concamerata	Wet	33.3	Centre	Flat	35.6	Edge	West	30.7	Flat	East	32.8	4.9	2.3	-2.6	-0.5	-2.3	2.6	0.5
Marino Rocks	January 28	5	44	Yes	2:17pm	28	0	Lower	Diloma concamerata	Wet	33.9	Centre	Peak	39.6	Edge	East	32.5	Flat	Centre	35	7.1	5.7	-1.4	1.1	-5.7	1.4	-1.1
Marino Rocks	January 28	5	45	Yes	2:18pm	28	0	Lower	Diloma concamerata	Wet	32.9	Centre	Flat	39.8	Edge	West	30.3	Flat	Centre	33.5	9.5	6.9	-2.6	0.6	-6.9	2.6	-0.6
Marino Rocks	January 28	5	46	Yes	2:20pm	28	0	Lower	Diloma concamerata	Wet	33.7	Centre	Flat	40.3	Edge	West	29.7	Edge	East	34.9	10.6	6.6	-4	1.2	-6.6	4	-1.2
Marino Rocks	January 28	5	47	Yes	2:24pm	28	0	Lower	Diloma concamerata	Dry	35.2	Centre	Flat	42.4	Edge	Centre	33	Flat	Centre	36.8	9.4	7.2	-2.2	1.6	-7.2	2.2	-1.6
Marino Rocks	January 28	5	48	Yes	2:25pm	28	0	Lower	Diloma concamerata	Dry	33.8	Centre	Flat	42.6	Edge	West	31.9	Flat	Centre	36.5	10.7	8.8	-1.9	2.7	-8.8	1.9	-2.7
Marino Rocks	January 28	5	50	Yes	2:29pm	28	0	Lower	Diloma concamerata	Wet	34.7	Centre	Flat	44.2	Edge	Centre	27.9	Edge	Centre	35.9	16.3	9.5	-6.8	1.2	-9.5	6.8	-1.2
Marino Rocks	January 28	5	51	Yes	2:31pm	28	0	Lower	Diloma concamerata	Dry	35.1	West	Flat	37.8	Edge	West	30.9	Flat	East	34.2	6.9	2.7	-4.2	-0.9	-2.7	4.2	0.9
Marino Rocks	January 28	5	54	Yes	2:36pm	28	0	Lower	Diloma concamerata	Wet	34.8	Centre	Flat	38.4	Edge	Centre	32.4	Flat	West	35.1	6	3.6	-2.4	0.3	-3.6	2.4	-0.3
Marino Rocks	January 28	5	55	Yes	2:39pm	28	0	Lower	Diloma concamerata	Wet	38	Centre	Flat	44.5	Edge	West	30.7	Edge	East	37.8	13.8	6.5	-7.3	-0.2	-6.5	7.3	0.2
Marino Rocks	January 28	5	56	Yes	2:40pm	28	0	Lower	Diloma concamerata	Dry	36.5	West	Flat	41.8	Edge	Centre	34.7	Flat	Centre	37.1	7.1	5.3	-1.8	0.6	-5.3	1.8	-0.6
Marino Rocks	January 28	5	57	Yes	2:42pm	28	0	Lower	Diloma concamerata	Dry	34.6	West	Flat	39.3	Flat	Centre	33.7	Flat	West	36	5.6	4.7	-0.9	1.4	-4.7	0.9	-1.4
Marino Rocks	January 28	5	59	Yes	2:47pm	28	0	Lower	Diloma concamerata	Wet	31.3	Centre	Edge	38.7	Edge	Centre	29	Edge	West	32.6	9.7	7.4	-2.3	1.3	-7.4	2.3	-1.3
Marino Rocks	January 28	5	75	Yes	3:32pm	29	0	Upper	Diloma concamerata	Dry	37	Centre	Flat	41.2	Edge	West	32.3	Peak	Centre	36.3	8.9	4.2	-4.7	-0.7	-4.2	4.7	0.7
Marino Rocks	January 28	5	24	No	1:02pm	27	0	Lower	Bembicium nanum	Wet	38.9	Centre	Edge	40.9	Depression	East	30.2	Flat	West	33.5	10.7	2	-8.7	-5.4	-2	8.7	5.4
Marino Rocks	January 28	5	26	No	1:08pm	27	0	Lower	Bembicium nanum	Wet	31.8	Centre	Edge	42.7	Edge	Centre	30.8	Flat	Centre	35.3	11.9	10.9	-1	3.5	-10.9	1	-3.5
Marino Rocks	January 28	5	41	Yes	2:09pm	28	0	Lower	Bembicium nanum	Dry	36.1	Centre	Flat	43.2	Edge	East	32.7	Flat	West	36.9	10.5	7.1	-3.4	0.8	-7.1	3.4	-0.8
Marino Rocks	January 28	5	42	Yes	2:14pm	28	0	Lower	Bembicium nanum	Dry	34.8	Centre	Flat	38.3	Edge	Centre	33.5	Flat	Centre	35.7	4.8	3.5	-1.3	0.9	-3.5	1.3	-0.9
Marino Rocks	January 28	5	43	Yes	2:15pm	28	0	Lower	Bembicium nanum	Dry	38.4	East	Flat	47.8	Edge	Centre	34.9	Flat	Centre	39.3	12.9	9.4	-3.5	0.9	-9.4	3.5	-0.9
Marino Rocks	January 28	5	48	No	2:25pm	28	0	Lower	Bembicium nanum	Dry	36.5	Centre	Flat	42.6	Edge	Centre	31.9	Flat	Centre	36.5	10.7	6.1	-4.6	0	-6.1	4.6	0
Marino Rocks	January 28	5	49	Yes	2:27pm	28	0	Lower	Bembicium nanum	Dry	41.3	Centre	Edge	46.9	Edge	West	39.9	Flat	East	42.8	7	5.6	-1.4	1.5	-5.6	1.4	-1.5
Marino Rocks	January 28	5	51	No	2:31pm	28	0	Lower	Bembicium nanum	Dry	35.3	East	Flat	37.8	Edge	West	31.8	Flat	East	34.2	6	2.5	-3.5	-1.1	-2.5	3.5	1.1
Marino Rocks	January 28	5	52	Yes	2:33pm	28	0	Lower	Bembicium nanum	Dry	41	East	Edge	44.3	Edge	Centre	37.3	Flat	Centre	40.3	7	3.3	-3.7	-0.7	-3.3	3.7	0.7
Marino Rocks	January 28	5	53	Yes	2:35pm	28	0	Lower	Bembicium nanum	Dry	41.4	West	Edge	45.9	Depression	Centre	34.8	Flat	Centre	39.8	11.1	4.5	-6.6	-1.6	-4.5	6.6	1.6
Marino Rocks	January 28	5	59	No	2:47pm	28	0	Lower	Bembicium nanum	Wet	34	East	Flat	38.7	Edge	Centre	28.6	Edge	West	32.6	10.1	4.7	-5.4	-1.4	-4.7	5.4	1.4
Marino Rocks	January 28	5	60	Yes	3:04pm	29	0	Upper	Bembicium nanum	Dry	35.9	Centre	Flat	42.4	Edge	West	34.7	Flat	Centre	37.5	7.7	6.5	-1.2	1.6	-6.5	1.2	-1.6
Marino Rocks	January 28	5	61	Yes	3:07pm	29	0	Upper	Bembicium nanum	Dry	41.8	Centre	Flat	46.8	Edge	Centre	36.9	Flat	East	40.8	9.9	5	-4.9	-1	-5	4.9	1
Marino Rocks	January 28	5	62	Yes	3:09pm	29	0	Upper	Bembicium nanum	Dry	39.4	Centre	Flat	46.3	Edge	West	35.6	Flat	Centre	39.1	10.7	6.9	-3.8	-0.3	-6.9	3.8	0.3
Marino Rocks	January 28	5	63	Yes	3:12pm	29	0	Upper	Bembicium nanum	Dry	37	Centre	Flat	44.3	Depression	Centre	36.8	Flat	East	39.7	7.5	7.3	-0.2	2.7	-7.3	0.2	-2.7
Marino Rocks	January 28	5	65	Yes	3:14pm	29	0	Upper	Bembicium nanum	Dry	38.7	West	Edge	47.8	Drop	West	34	Flat	Centre	39.6	13.8	9.1	-4.7	0.9	-9.1	4.7	-0.9
Marino Rocks	January 28	5	66	Yes	3:16pm	29	0	Upper	Bembicium nanum	Dry	41.2	Centre	Flat	46.7	Edge	East	37.7	Flat	Centre	40.8	9	5.5	-3.5	-0.4	-5.5	3.5	0.4
Marino Rocks	January 28	5	67	Yes	3:18pm	29	0	Upper	Bembicium nanum	Dry	38.4	Centre	Flat	43.3	Edge	East	37	Flat	West	39.8	6.3	4.9	-1.4	1.4	-4.9	1.4	-1.4
Marino Rocks	January 28	5	68	Yes	3:19pm	29	0	Upper	Bembicium nanum	Dry	41.5	Centre	Flat	46.1	Edge	West	37.7	Flat	East	41.2	8.4	4.6	-3.8	-0.3	-4.6	3.8	0.3
Marino Rocks	January 28	5	69	Yes	3:20pm	29	0	Upper	Bembicium nanum	Dry	41.8	East	Flat	47.2	Edge	West	35.7	Edge	Centre	41.9	11.5	5.4	-6.1	0.1	-5.4	6.1	-0.1
Marino Rocks	January 28	5	70	Yes	3:22pm	29	0	Upper	Bembicium nanum	Dry	39.4	Centre	Flat	42.9	Edge	West	36.1	Flat	East	39	6.8	3.5	-3.3	-0.4	-3.5	3.3	0.4
Marino Rocks	January 28	5	71	Yes	3:24pm	29	0	Upper	Bembicium nanum	Dry	38.5	Centre	Flat	45.5	Edge	West	38	Flat	West	40.4	7.5	7	-0.5	1.9	-7	0.5	-1.9
Marino Rocks	January 28	5	72	Yes	3:27pm	29	0	Upper	Bembicium nanum	Dry	42.9	East	Flat	48.1	Flat	Centre	42.8	Peak	East	45	5.3	5.2	-0.1	2.1	-5.2	0.1	-2.1
Marino Rocks	January 28	5	73	Yes	3:29pm	29	0	Upper	Bembicium nanum	Dry	34.8	East	Flat	44.3	Depression	West	34.1	Flat	East	37.6	10.2	9.5	-0.7	2.8	-9.5	0.7	-2.8
Marino Rocks	January 28	5	74	Yes	3:30pm	29	0	Upper	Bembicium nanum	Dry	38.9	Centre	Flat	41.5	Flat	West	35.5	Edge	East	38.6	6	2.6	-3.4	-0.3	-2.6	3.4	0.3
Marino Rocks	January 28	5	75	No	3:32pm	29	0	Upper	Bembicium nanum	Dry	36.6	Centre	Flat	41.2	Edge	West	31.8	Flat	Centre	36.3	9.4	4.6	-4.8	-0.3	-4.6	4.8	0.3
Marino Rocks	January 28	5	76	Yes	3:34pm	29	0	Upper	Bembicium nanum	Dry	38.6	Centre	Flat	44.9	Edge	West	36.3	Flat	East	39.6	8.6	6.3	-2.3	1	-6.3	2.3	-1
Marino Rocks	January 28	5	77	Yes	3:36pm	29	0	Upper	Bembicium nanum	Dry	40.5	Centre	Flat	45.7	Depression	Centre	36.3	Flat	West	39.8	9.4	5.2	-4.2	-0.7	-5.2	4.2	0.7
Marino Rocks	January 28	5	78	Yes	3:37pm	29	0	Upper	Bembicium nanum	Dry	39.3	Centre	Flat	46.6	Edge	West	37.9	Edge	East	41	8.7	7.3	-1.4	1.7	-7.3	1.4	-1.7
Marino Rocks	January 28	5	79	Yes	3:39pm	29	0	Upper	Bembicium nanum	Dry	37	East	Drop	40.7	Edge	West	35.3	Flat	East	37.6	5.4	3.7	-1.7	0.6	-3.7	1.7	-0.6
OSullivan Beach	January 29	5	1	Yes	12:45pm	29	0	Lower	Nerita atramentosa	Wet	27.1	East	Flat	30.9	Edge	Centre	23.2	Flat	East	27.2	7.7	3.8	-3.9	0.1	-3.8	3.9	-0.1
OSullivan Beach	January 29	5	6	Yes	12:51pm	29	0	Lower	Nerita atramentosa	Dry	29	Centre	Flat	31.9	Edge	West	24.5	Flat	East	28.5	7.4	2.9	-4.5	-0.5	-2.9	4.5	0.5
OSullivan Beach	January 29	5	7	Yes	12:53pm	29	0	Lower	Nerita atramentosa	Dry	31.7	Centre	Drop	36.1	Flat	East	29.1	Flat	Centre	32.3	7	4.4	-2.6	0.6	-4.4	2.6	-0.6
OSullivan Beach	January 29	5	8	Yes	12:54pm	29	0	Lower	Nerita atramentosa	Dry	29.7	West	Edge	34.9	Edge	West	26.5	Flat	Centre	30.6	8.4	5.2	-3.2	0.9	-5.2	3.2	-0.9
OSullivan Beach	January 29	5	10	Yes	12:57pm	29	0	Lower	Nerita atramentosa	Wet	29.3	Centre	Flat	39	Edge	East	26.9	Edge	West	32	12.1	9.7	-2.4	2.7	-9.7	2.4	-2.7
OSullivan Beach	January 29	5	12	Yes	12:59pm	29	0	Lower	Nerita atramentosa	Wet	33.7	Centre	Flat	35.8	Flat	East	26.9	Flat	Centre	32.6	8.9	2.1	-6.8	-1.1	-2.1	6.8	1.1
OSullivan Beach	January 29	5	13	Yes	1:01pm	29	0	Lower	Nerita atramentosa	Wet	31.6	East	Edge	36.1	Edge	Centre	30.7	Flat	Centre	33.1	5.4	4.5	-0.9	1.5	-4.5	0.9	-1.5
OSullivan Beach	January 29	5	14	Yes	1:02pm	29	0	Lower	Nerita atramentosa	Wet	32.1	Centre	Flat	38.8	Edge	East	30.1	Flat	West	33.6	8.7	6.7	-2	1.5	-6.7	2	-1.5
OSullivan Beach	January 29	5	16	Yes	1:05pm	29	0	Lower	Nerita atramentosa	Dry	33.8	Centre	Edge	39.1	Flat	East	29.6	Flat	Centre	34	9.5	5.3	-4.2	0.2	-5.3	4.2	-0.2
OSullivan Beach	January 29	5	17	Yes	1:07pm	29	0	Lower	Nerita atramentosa	Wet	33.1	West	Flat	39.3	Edge	Centre	30.8	Flat	West	34.3	8.5	6.2	-2.3	1.2	-6.2	2.3	-1.2
OSullivan Beach	January 29	5	19	Yes	1:10pm	29	0	Lower	Nerita atramentosa	Dry	33.1	Centre	Edge	36.8	Flat	East	27.3	Flat	West	32.7	9.5	3.7	-5.8	-0.4	-3.7	5.8	0.4
OSullivan Beach	January 29	5	20	Yes	1:11pm	29	0	Lower	Nerita atramentosa	Dry	31.3	Centre	Flat	36.5	Edge	West	28.9	Flat	Centre	32.5	7.6	5.2	-2.4	1.2	-5.2	2.4	-1.2
OSullivan Beach	January 29	5	21	Yes	1:13pm	29	0	Lower	Nerita atramentosa	Wet	29.9	Centre	Flat	34.6	Edge	West	26.7	Edge	West	30.9	7.9	4.7	-3.2	1	-4.7	3.2	-1
OSullivan Beach	January 29	5	23	Yes	1:17pm	29	0	Lower	Nerita atramentosa	Wet	32.4	Centre	Flat	39.6	Flat	East	28.4	Flat	Centre	33.6	11.2	7.2	-4	1.2	-7.2	4	-1.2
OSullivan Beach	January 29	5	24	Yes	1:18pm	29	0	Lower	Nerita atramentosa	Wet	32.3	East	Flat	40.1	Edge	East	29.8	Flat	Centre	34.9	10.3	7.8	-2.5	2.6	-7.8	2.5	-2.6
OSullivan Beach	January 29	5	25	Yes	1:20pm	29	0	Lower	Nerita atramentosa	Wet	31.3	East	Edge	34	Depression	West	28.6	Flat	East	31.5	5.4	2.7	-2.7	0.2	-2.7	2.7	-0.2
OSullivan Beach	January 29	5	26	Yes	1:21pm	29	0	Lower	Nerita atramentosa	Dry	31	West	Flat	35.6	Edge	East	29.6	Flat	Centre	32.1	6	4.6	-1.4	1.1	-4.6	1.4	-1.1
OSullivan Beach	January 29	5	28	Yes	1:23pm	29	0	Lower	Nerita atramentosa	Wet	30.5	Centre	Flat	34.9	Edge	West	29.1	Depression	Centre	31.8	5.8	4.4	-1.4	1.3	-4.4	1.4	-1.3
OSullivan Beach	January 29	5	29	Yes	1:26pm	29	0	Lower	Nerita atramentosa	Dry	33.9	East	Depression	35.3	Edge	West	26.9	Flat	East	31.7	8.4	1.4	-7	-2.2	-1.4	7	2.2
OSullivan Beach	January 29	5	30	Yes	1:27pm	29	0	Lower	Nerita atramentosa	Dry	28.1	Centre	Flat	34.1	Edge	Centre	25.5	Peak	Centre	30.9	8.6	6	-2.6	2.8	-6	2.6	-2.8
OSullivan Beach	January 29	5	31	Yes	1:28pm	29	0	Lower	Nerita atramentosa	Wet	31.8	Centre	Flat	37.8	Flat	Centre	29.6	Peak	West	33.9	8.2	6	-2.2	2.1	-6	2.2	-2.1
OSullivan Beach	January 29	5	32	Yes	1:30pm	29	0	Lower	Nerita atramentosa	Dry	31.9	Centre	Flat	35.7	Edge	West	29.7	Flat	Centre	32.3	6	3.8	-2.2	0.4	-3.8	2.2	-0.4
OSullivan Beach	January 29	5	33	Yes	1:31pm	29	0	Lower	Nerita atramentosa	Wet	33.4	East	Edge	38.5	Flat	West	31.1	Flat	East	34.5	7.4	5.1	-2.3	1.1	-5.1	2.3	-1.1
OSullivan Beach	January 29	5	34	Yes	1:40pm	30	0	Lower	Nerita atramentosa	Dry	30.9	Centre	Flat	37	Depression	Centre	28.5	Flat	Centre	32.4	8.5	6.1	-2.4	1.5	-6.1	2.4	-1.5
OSullivan Beach	January 29	5	37	Yes	1:46pm	30	0	Lower	Nerita atramentosa	Dry	30.6	Centre	Flat	36.3	Edge	Centre	27.9	Flat	Centre	32	8.4	5.7	-2.7	1.4	-5.7	2.7	-1.4
OSullivan Beach	January 29	5	40	Yes	1:52pm	30	0	Lower	Nerita atramentosa	Wet	31.7	Centre	Peak	34.9	Depression	East	28.2	Flat	Centre	31.7	6.7	3.2	-3.5	0	-3.2	3.5	0
OSullivan Beach	January 29	5	41	Yes	1:53pm	30	0	Lower	Nerita atramentosa	Wet	32.9	Centre	Flat	38.6	Depression	Centre	28.5	Flat	Centre	34	10.1	5.7	-4.4	1.1	-5.7	4.4	-1.1
OSullivan Beach	January 29	5	42	Yes	1:54pm	30	0	Lower	Nerita atramentosa	Wet	30.6	Centre	Flat	38.4	Depression	Centre	29.4	Flat	Centre	32.4	9	7.8	-1.2	1.8	-7.8	1.2	-1.8
OSullivan Beach	January 29	5	44	Yes	1:57pm	30	0	Lower	Nerita atramentosa	Wet	35.6	Centre	Flat	39.7	Depression	East	31.5	Flat	West	35.7	8.2	4.1	-4.1	0.1	-4.1	4.1	-0.1
OSullivan Beach	January 29	5	45	Yes	2:02pm	30	0	Lower	Nerita atramentosa	Wet	34.5	Centre	Flat	42.1	Depression	West	31.4	Flat	East	35.2	10.7	7.6	-3.1	0.7	-7.6	3.1	-0.7
OSullivan Beach	January 29	5	4	Yes	12:49pm	29	0	Lower	Diloma concamerata	Dry	32.4	Centre	Flat	38.1	Flat	East	30	Flat	Centre	33	8.1	5.7	-2.4	0.6	-5.7	2.4	-0.6
OSullivan Beach	January 29	5	10	No	12:57pm	29	0	Lower	Diloma concamerata	Wet	29.8	Centre	Flat	39	Flat	East	26.9	Edge	West	32	12.1	9.2	-2.9	2.2	-9.2	2.9	-2.2
OSullivan Beach	January 29	5	11	Yes	12:58pm	29	0	Lower	Diloma concamerata	Wet	32.9	East	Flat	35.8	Edge	East	30	Flat	Centre	32.8	5.8	2.9	-2.9	-0.1	-2.9	2.9	0.1
OSullivan Beach	January 29	5	12	No	12:59pm	29	0	Lower	Diloma concamerata	Wet	33.9	Centre	Flat	35.8	Flat	East	26.9	Flat	Centre	32.6	8.9	1.9	-7	-1.3	-1.9	7	1.3
OSullivan Beach	January 29	5	14	No	1:02pm	29	0	Lower	Diloma concamerata	Wet	32.6	Centre	Flat	38.8	Edge	East	30.1	Flat	Centre	33.6	8.7	6.2	-2.5	1	-6.2	2.5	-1
OSullivan Beach	January 29	5	17	No	1:07pm	29	0	Lower	Diloma concamerata	Wet	33.6	Centre	Flat	39.3	Edge	Centre	30.8	Flat	West	34.3	8.5	5.7	-2.8	0.7	-5.7	2.8	-0.7
OSullivan Beach	January 29	5	18	Yes	1:09pm	29	0	Lower	Diloma concamerata	Wet	27.5	Centre	Flat	34.8	Flat	West	25.5	Flat	East	29	9.3	7.3	-2	1.5	-7.3	2	-1.5
OSullivan Beach	January 29	5	21	No	1:13pm	29	0	Lower	Diloma concamerata	Wet	31.3	Centre	Flat	34.6	Depression	East	26.7	Edge	West	30.9	7.9	3.3	-4.6	-0.4	-3.3	4.6	0.4
OSullivan Beach	January 29	5	27	Yes	1:22pm	29	0	Lower	Diloma concamerata	Wet	30.9	East	Edge	35.9	Depression	West	30.3	Flat	Centre	32.8	5.6	5	-0.6	1.9	-5	0.6	-1.9
OSullivan Beach	January 29	5	28	No	1:23pm	29	0	Lower	Diloma concamerata	Wet	30.7	Centre	Flat	34.9	Edge	West	29.1	Depression	Centre	31.8	5.8	4.2	-1.6	1.1	-4.2	1.6	-1.1
OSullivan Beach	January 29	5	31	No	1:28pm	29	0	Lower	Diloma concamerata	Wet	30.6	Centre	Flat	37.7	Flat	Centre	29.8	Peak	West	33.9	7.9	7.1	-0.8	3.3	-7.1	0.8	-3.3
OSullivan Beach	January 29	5	35	Yes	1:42pm	30	0	Lower	Diloma concamerata	Wet	29.6	East	Flat	37.1	Flat	West	27.1	Flat	Centre	31.9	10	7.5	-2.5	2.3	-7.5	2.5	-2.3
OSullivan Beach	January 29	5	37	No	1:46pm	30	0	Lower	Diloma concamerata	Dry	31.6	Centre	Flat	36.3	Edge	Centre	27.9	Flat	Centre	32	8.4	4.7	-3.7	0.4	-4.7	3.7	-0.4
OSullivan Beach	January 29	5	38	Yes	1:48pm	30	0	Lower	Diloma concamerata	Wet	35.1	Centre	Flat	40.1	Flat	West	32	Edge	East	36.5	8.1	5	-3.1	1.4	-5	3.1	-1.4
OSullivan Beach	January 29	5	39	Yes	1:50pm	30	0	Lower	Diloma concamerata	Wet	33.9	Centre	Flat	36.8	Depression	West	29.6	Flat	Centre	32.9	7.2	2.9	-4.3	-1	-2.9	4.3	1
OSullivan Beach	January 29	5	40	No	1:52pm	30	0	Lower	Diloma concamerata	Wet	32.4	Centre	Flat	35.6	Depression	East	27.9	Flat	Centre	31.7	7.7	3.2	-4.5	-0.7	-3.2	4.5	0.7
OSullivan Beach	January 29	5	41	No	1:53pm	30	0	Lower	Diloma concamerata	Wet	33.4	East	Flat	38.6	Depression	Centre	28.5	Flat	Centre	34	10.1	5.2	-4.9	0.6	-5.2	4.9	-0.6
OSullivan Beach	January 29	5	42	No	1:54pm	30	0	Lower	Diloma concamerata	Wet	31.5	Centre	Flat	38.4	Depression	Centre	29.4	Flat	Centre	32.4	9	6.9	-2.1	0.9	-6.9	2.1	-0.9
OSullivan Beach	January 29	5	43	Yes	1:56pm	30	0	Lower	Diloma concamerata	Dry	32.2	Centre	Flat	41.2	Edge	West	29.3	Flat	Centre	33.8	11.9	9	-2.9	1.6	-9	2.9	-1.6
OSullivan Beach	January 29	5	44	No	1:57pm	30	0	Lower	Diloma concamerata	Wet	34.5	Centre	Flat	39.7	Depression	East	31.5	Flat	West	35.7	8.2	5.2	-3	1.2	-5.2	3	-1.2
OSullivan Beach	January 29	5	45	No	2:02pm	30	0	Lower	Diloma concamerata	Wet	33.9	Centre	Flat	42.1	Depression	West	31.4	Flat	East	35.2	10.7	8.2	-2.5	1.3	-8.2	2.5	-1.3
OSullivan Beach	January 29	5	47	Yes	2:05pm	30	0	Lower	Diloma concamerata	Wet	33.6	Centre	Flat	37.4	Edge	West	30.1	Edge	East	33.1	7.3	3.8	-3.5	-0.5	-3.8	3.5	0.5
OSullivan Beach	January 29	5	48	Yes	2:08pm	30	0	Lower	Diloma concamerata	Dry	30.2	Centre	Flat	35.7	Flat	West	28.4	Flat	Centre	32.2	7.3	5.5	-1.8	2	-5.5	1.8	-2
OSullivan Beach	January 29	5	49	Yes	2:10pm	30	0	Lower	Diloma concamerata	Dry	31.8	Centre	Edge	36.8	Edge	West	28.8	Flat	Centre	31.8	8	5	-3	0	-5	3	0
OSullivan Beach	January 29	5	50	Yes	2:10pm	30	0	Lower	Diloma concamerata	Dry	34.2	East	Edge	38.4	Flat	Centre	31.5	Flat	West	34.7	6.9	4.2	-2.7	0.5	-4.2	2.7	-0.5
OSullivan Beach	January 29	5	51	Yes	2:12pm	30	0	Lower	Diloma concamerata	Wet	33.5	Centre	Flat	38.1	Edge	Centre	31.6	Peak	Centre	34.5	6.5	4.6	-1.9	1	-4.6	1.9	-1
OSullivan Beach	January 29	5	52	Yes	2:14pm	30	0	Lower	Diloma concamerata	Wet	32.2	Centre	Flat	39.3	Depression	Centre	30.8	Peak	Centre	34.2	8.5	7.1	-1.4	2	-7.1	1.4	-2
OSullivan Beach	January 29	5	53	Yes	2:15pm	30	0	Lower	Diloma concamerata	Wet	31.9	Centre	Depression	35.5	Edge	West	31.1	Flat	Centre	33.4	4.4	3.6	-0.8	1.5	-3.6	0.8	-1.5
OSullivan Beach	January 29	5	54	Yes	2:18pm	30	0	Lower	Diloma concamerata	Dry	34.9	Centre	Flat	37.6	Edge	West	29	Flat	Centre	33.2	8.6	2.7	-5.9	-1.7	-2.7	5.9	1.7
OSullivan Beach	January 29	5	55	Yes	2:20pm	30	0	Lower	Diloma concamerata	Wet	31.7	Centre	Flat	34	Edge	Centre	28.8	Flat	Centre	31.5	5.2	2.3	-2.9	-0.2	-2.3	2.9	0.2
OSullivan Beach	January 29	5	3	Yes	12:48pm	29	0	Lower	Bembicium nanum	Dry	32.8	Centre	Edge	41.6	Edge	East	28.3	Flat	Centre	32.3	13.3	8.8	-4.5	-0.5	-8.8	4.5	0.5
OSullivan Beach	January 29	5	4	No	12:49pm	29	0	Lower	Bembicium nanum	Dry	31.9	Centre	Flat	38.1	Flat	East	30	Flat	Centre	33	8.1	6.2	-1.9	1.1	-6.2	1.9	-1.1
OSullivan Beach	January 29	5	5	Yes	12:50pm	29	0	Lower	Bembicium nanum	Dry	33.8	West	Flat	39.7	Flat	Centre	32.5	Depression	West	35.6	7.2	5.9	-1.3	1.8	-5.9	1.3	-1.8
OSullivan Beach	January 29	5	9	Yes	12:56pm	29	0	Lower	Bembicium nanum	Dry	29.7	East	Flat	41.8	Edge	West	27.3	Flat	Centre	33.7	14.5	12.1	-2.4	4	-12.1	2.4	-4
OSullivan Beach	January 29	5	15	Yes	1:04pm	29	0	Lower	Bembicium nanum	Dry	36.8	East	Depression	41	Edge	West	33.2	Flat	Centre	36.8	7.8	4.2	-3.6	0	-4.2	3.6	0
OSullivan Beach	January 29	5	22	Yes	1:15pm	29	0	Lower	Bembicium nanum	Dry	36.2	East	Flat	39.8	Edge	West	34.7	Depression	East	36.5	5.1	3.6	-1.5	0.3	-3.6	1.5	-0.3
OSullivan Beach	January 29	5	30	No	1:27pm	29	0	Lower	Bembicium nanum	Dry	32	West	Edge	34.1	Edge	Centre	25.5	Flat	Centre	30.9	8.6	2.1	-6.5	-1.1	-2.1	6.5	1.1
OSullivan Beach	January 29	5	36	Yes	1:45pm	30	0	Lower	Bembicium nanum	Dry	41	Centre	Drop	43.4	Edge	West	34.2	Flat	Centre	38.7	9.2	2.4	-6.8	-2.3	-2.4	6.8	2.3
OSullivan Beach	January 29	5	46	Yes	2:04pm	30	0	Lower	Bembicium nanum	Dry	33.7	West	Flat	39.8	Edge	West	30.3	Flat	Centre	35.5	9.5	6.1	-3.4	1.8	-6.1	3.4	-1.8
OSullivan Beach	January 29	5	56	Yes	2:35pm	30	0	Upper	Bembicium nanum	Dry	41.1	Centre	Flat	44.5	Edge	West	36.9	Depression	Centre	41	7.6	3.4	-4.2	-0.1	-3.4	4.2	0.1
OSullivan Beach	January 29	5	57	Yes	2:39pm	30	0	Upper	Bembicium nanum	Dry	34.7	Centre	Flat	40.5	Flat	West	31.9	Depression	East	35.9	8.6	5.8	-2.8	1.2	-5.8	2.8	-1.2
OSullivan Beach	January 29	5	58	Yes	2:40pm	30	0	Upper	Bembicium nanum	Dry	40.3	Centre	Flat	44.3	Edge	West	38.3	Flat	Centre	40.8	6	4	-2	0.5	-4	2	-0.5
OSullivan Beach	January 29	5	59	Yes	2:41pm	30	0	Upper	Bembicium nanum	Dry	39.6	West	Flat	42.9	Edge	West	35	Flat	East	38.3	7.9	3.3	-4.6	-1.3	-3.3	4.6	1.3
OSullivan Beach	January 29	5	60	Yes	2:43pm	30	0	Upper	Bembicium nanum	Dry	35.8	Centre	Flat	41.3	Depression	West	33.1	Flat	Centre	36.1	8.2	5.5	-2.7	0.3	-5.5	2.7	-0.3
OSullivan Beach	January 29	5	61	Yes	2:44pm	30	0	Upper	Bembicium nanum	Dry	39.2	Centre	Depression	44	Depression	Centre	32.8	Flat	East	37.4	11.2	4.8	-6.4	-1.8	-4.8	6.4	1.8
OSullivan Beach	January 29	5	62	Yes	2:45pm	30	0	Upper	Bembicium nanum	Dry	41	Centre	Flat	47.1	Edge	West	37.2	Flat	Centre	42.1	9.9	6.1	-3.8	1.1	-6.1	3.8	-1.1
OSullivan Beach	January 29	5	63	Yes	2:46pm	30	0	Upper	Bembicium nanum	Dry	36.3	East	Flat	41.2	Flat	Centre	32.6	Flat	Centre	36.7	8.6	4.9	-3.7	0.4	-4.9	3.7	-0.4
OSullivan Beach	January 29	5	64	Yes	2:47pm	30	0	Upper	Bembicium nanum	Dry	38.6	Centre	Flat	46.1	Depression	West	35.9	Edge	West	40.7	10.2	7.5	-2.7	2.1	-7.5	2.7	-2.1
OSullivan Beach	January 29	5	65	Yes	2:50pm	30	0	Upper	Bembicium nanum	Dry	39.6	Centre	Flat	43.2	Flat	East	35.1	Flat	West	38.8	8.1	3.6	-4.5	-0.8	-3.6	4.5	0.8
OSullivan Beach	January 29	5	66	Yes	2:51pm	30	0	Upper	Bembicium nanum	Dry	38.3	Centre	Flat	42.5	Depression	Centre	33.5	Flat	East	36.9	9	4.2	-4.8	-1.4	-4.2	4.8	1.4
OSullivan Beach	January 29	5	67	Yes	2:52pm	30	0	Upper	Bembicium nanum	Dry	42.2	Centre	Flat	44	Edge	Centre	34.3	Edge	Centre	39	9.7	1.8	-7.9	-3.2	-1.8	7.9	3.2
OSullivan Beach	January 29	5	68	Yes	2:53pm	30	0	Upper	Bembicium nanum	Dry	42.9	East	Edge	45.5	Flat	West	38	Flat	Centre	41.9	7.5	2.6	-4.9	-1	-2.6	4.9	1
OSullivan Beach	January 29	5	69	Yes	2:54pm	30	0	Upper	Bembicium nanum	Dry	41.2	Centre	Flat	46.2	Flat	Centre	38.4	Peak	Centre	42	7.8	5	-2.8	0.8	-5	2.8	-0.8
OSullivan Beach	January 29	5	70	Yes	2:56pm	30	0	Upper	Bembicium nanum	Dry	38.9	East	Flat	44.3	Edge	Centre	36	Edge	East	38.7	8.3	5.4	-2.9	-0.2	-5.4	2.9	0.2
OSullivan Beach	January 29	5	71	Yes	2:57pm	30	0	Upper	Bembicium nanum	Dry	39	East	Flat	42.5	Depression	East	33.7	Flat	Centre	38	8.8	3.5	-5.3	-1	-3.5	5.3	1
OSullivan Beach	January 29	5	72	Yes	2:58pm	30	0	Upper	Bembicium nanum	Wet	41.5	East	Flat	42.1	Edge	East	34.8	Flat	Centre	38.1	7.3	0.6	-6.7	-3.4	-0.6	6.7	3.4
OSullivan Beach	January 29	5	73	Yes	2:59pm	30	0	Upper	Bembicium nanum	Dry	38.7	East	Flat	43.1	Flat	West	35.9	Flat	West	38.1	7.2	4.4	-2.8	-0.6	-4.4	2.8	0.6
OSullivan Beach	January 29	5	74	Yes	3:01pm	30	0	Upper	Bembicium nanum	Dry	42.3	West	Flat	43.3	Edge	West	36.3	Flat	Centre	39.8	7	1	-6	-2.5	-1	6	2.5
OSullivan Beach	January 29	5	75	Yes	3:02pm	30	0	Upper	Bembicium nanum	Dry	37.4	East	Flat	43.9	Edge	West	35.2	Flat	East	39.1	8.7	6.5	-2.2	1.7	-6.5	2.2	-1.7
OSullivan Beach	January 29	5	76	Yes	3:03pm	30	0	Upper	Bembicium nanum	Dry	37.5	Centre	Flat	42.5	Edge	East	32	Flat	West	36.8	10.5	5	-5.5	-0.7	-5	5.5	0.7
OSullivan Beach	February 9	7	1	Yes	12:00pm	38	1	Lower	Nerita atramentosa	Wet	30.2	Centre	Flat	35.8	Flat	East	27.6	Flat	Centre	30.7	8.2	5.6	-2.6	0.5	-5.6	2.6	-0.5
OSullivan Beach	February 9	7	3	Yes	12:04pm	38	1	Lower	Nerita atramentosa	Dry	32.5	West	Flat	39.3	Flat	East	30.2	Flat	West	34.5	9.1	6.8	-2.3	2	-6.8	2.3	-2
OSullivan Beach	February 9	7	4	Yes	12:05pm	38	1	Lower	Nerita atramentosa	Wet	35.3	Centre	Flat	39	Edge	West	33.5	Flat	Centre	35.2	5.5	3.7	-1.8	-0.1	-3.7	1.8	0.1
OSullivan Beach	February 9	7	5	Yes	12:09pm	38	1	Lower	Nerita atramentosa	Wet	35.5	West	Edge	41.1	Edge	East	33	Flat	Centre	36.2	8.1	5.6	-2.5	0.7	-5.6	2.5	-0.7
OSullivan Beach	February 9	7	7	Yes	12:12pm	38	1	Lower	Nerita atramentosa	Wet	35.2	Centre	Flat	39.7	Edge	Centre	33.1	Flat	Centre	35.9	6.6	4.5	-2.1	0.7	-4.5	2.1	-0.7
OSullivan Beach	February 9	7	8	Yes	12:13pm	38	1	Lower	Nerita atramentosa	Wet	31.8	East	Flat	36.4	Flat	Centre	28.4	Flat	West	32.3	8	4.6	-3.4	0.5	-4.6	3.4	-0.5
OSullivan Beach	February 9	7	9	Yes	12:13pm	38	1	Lower	Nerita atramentosa	Wet	32.5	Centre	Flat	37.3	Edge	East	31.7	Flat	East	33.4	5.6	4.8	-0.8	0.9	-4.8	0.8	-0.9
OSullivan Beach	February 9	7	10	Yes	12:16pm	38	1	Lower	Nerita atramentosa	Dry	34.7	West	Edge	45.3	Flat	Centre	34	Flat	Centre	40.1	11.3	10.6	-0.7	5.4	-10.6	0.7	-5.4
OSullivan Beach	February 9	7	13	Yes	12:20pm	38	1	Lower	Nerita atramentosa	Wet	35	Centre	Flat	40.6	Edge	East	31.8	Depression	West	35.2	8.8	5.6	-3.2	0.2	-5.6	3.2	-0.2
OSullivan Beach	February 9	7	16	Yes	12:30pm	38	0	Lower	Nerita atramentosa	Wet	37.4	Centre	Drop	42.5	Edge	East	35.6	Flat	Centre	39.1	6.9	5.1	-1.8	1.7	-5.1	1.8	-1.7
OSullivan Beach	February 9	7	17	Yes	12:32pm	38	0	Lower	Nerita atramentosa	Wet	34.1	Centre	Flat	41.6	Edge	East	30.5	Flat	Centre	35.2	11.1	7.5	-3.6	1.1	-7.5	3.6	-1.1
OSullivan Beach	February 9	7	18	Yes	12:34pm	38	0	Lower	Nerita atramentosa	Dry	38.1	West	Edge	44.4	Edge	West	34.9	Flat	Centre	37.8	9.5	6.3	-3.2	-0.3	-6.3	3.2	0.3
OSullivan Beach	February 9	7	19	Yes	12:36pm	38	0	Lower	Nerita atramentosa	Wet	31.7	West	Peak	38.7	Flat	East	30.7	Peak	Centre	34.5	8	7	-1	2.8	-7	1	-2.8
OSullivan Beach	February 9	7	21	Yes	12:42pm	38	0	Lower	Nerita atramentosa	Wet	34.3	West	Edge	44.1	Flat	East	33.4	Flat	West	37.4	10.7	9.8	-0.9	3.1	-9.8	0.9	-3.1
OSullivan Beach	February 9	7	22	Yes	12:45pm	38	0	Lower	Nerita atramentosa	Wet	33.9	Centre	Flat	42	Depression	East	31.1	Flat	Centre	36.1	10.9	8.1	-2.8	2.2	-8.1	2.8	-2.2
OSullivan Beach	February 9	7	23	Yes	12:46pm	38	0	Lower	Nerita atramentosa	Wet	34.9	Centre	Depression	40.8	Flat	Centre	34	Depression	Centre	37.7	6.8	5.9	-0.9	2.8	-5.9	0.9	-2.8
OSullivan Beach	February 9	7	24	Yes	12:48pm	38	0	Lower	Nerita atramentosa	Wet	33.9	East	Edge	37	Flat	West	31.6	Edge	East	33.9	5.4	3.1	-2.3	0	-3.1	2.3	0
OSullivan Beach	February 9	7	25	Yes	12:49pm	38	0	Lower	Nerita atramentosa	Wet	33.1	East	Flat	39.4	Flat	West	29.4	Flat	East	34.8	10	6.3	-3.7	1.7	-6.3	3.7	-1.7
OSullivan Beach	February 9	7	26	Yes	12:50pm	38	0	Lower	Nerita atramentosa	Dry	34.7	Centre	Flat	40.4	Flat	West	33.4	Flat	Centre	36.7	7	5.7	-1.3	2	-5.7	1.3	-2
OSullivan Beach	February 9	7	27	Yes	12:54pm	38	0	Lower	Nerita atramentosa	Wet	34.9	Centre	Flat	40.9	Edge	Centre	30.4	Edge	Centre	35.3	10.5	6	-4.5	0.4	-6	4.5	-0.4
OSullivan Beach	February 9	7	28	Yes	12:55pm	38	0	Lower	Nerita atramentosa	Dry	37.1	Centre	Flat	43.9	Edge	East	35.9	Flat	East	39.3	8	6.8	-1.2	2.2	-6.8	1.2	-2.2
OSullivan Beach	February 9	7	29	Yes	12:55pm	38	0	Lower	Nerita atramentosa	Wet	34	Centre	Flat	39.4	Edge	Centre	32	Flat	East	35.5	7.4	5.4	-2	1.5	-5.4	2	-1.5
OSullivan Beach	February 9	7	30	Yes	12:56pm	38	0	Lower	Nerita atramentosa	Dry	36	East	Flat	42.6	Edge	East	34.2	Depression	Centre	38.8	8.4	6.6	-1.8	2.8	-6.6	1.8	-2.8
OSullivan Beach	February 9	7	34	Yes	1:07pm	38	0	Lower	Nerita atramentosa	Wet	34.2	Centre	Flat	45.7	Edge	Centre	32.7	Flat	Centre	37	13	11.5	-1.5	2.8	-11.5	1.5	-2.8
OSullivan Beach	February 9	7	35	Yes	1:10pm	38	0	Lower	Nerita atramentosa	Dry	36.9	East	Flat	43.5	Flat	Centre	34.9	Flat	West	40.2	8.6	6.6	-2	3.3	-6.6	2	-3.3
OSullivan Beach	February 9	7	40	Yes	1:16pm	38	0	Lower	Nerita atramentosa	Dry	37.2	Centre	Flat	40.7	Edge	West	34.6	Flat	Centre	37.9	6.1	3.5	-2.6	0.7	-3.5	2.6	-0.7
OSullivan Beach	February 9	7	41	Yes	1:17pm	38	0	Lower	Nerita atramentosa	Wet	33.6	Centre	Flat	37.8	Edge	Centre	32.1	Flat	Centre	34.8	5.7	4.2	-1.5	1.2	-4.2	1.5	-1.2
OSullivan Beach	February 9	7	42	Yes	1:18pm	38	0	Lower	Nerita atramentosa	Wet	37.4	East	Flat	40.5	Flat	Centre	35.7	Flat	East	38.2	4.8	3.1	-1.7	0.8	-3.1	1.7	-0.8
OSullivan Beach	February 9	7	44	Yes	1:21pm	38	0	Lower	Nerita atramentosa	Wet	40.9	Centre	Depression	44.3	Edge	West	37.5	Flat	West	40.7	6.8	3.4	-3.4	-0.2	-3.4	3.4	0.2
OSullivan Beach	February 9	7	45	Yes	1:22pm	38	0	Lower	Nerita atramentosa	Wet	39.1	Centre	Drop	42	Flat	West	34.8	Flat	East	39.2	7.2	2.9	-4.3	0.1	-2.9	4.3	-0.1
OSullivan Beach	February 9	7	3	No	12:04pm	38	1	Lower	Diloma concamerata	Dry	31.8	West	Edge	39.3	Flat	East	30.2	Flat	West	34.5	9.1	7.5	-1.6	2.7	-7.5	1.6	-2.7
OSullivan Beach	February 9	7	22	No	12:43pm	38	0	Lower	Diloma concamerata	Wet	33.8	West	Flat	42	Depression	East	32.3	Flat	Centre	36.1	9.7	8.2	-1.5	2.3	-8.2	1.5	-2.3
OSullivan Beach	February 9	7	23	No	12:44pm	38	0	Lower	Diloma concamerata	Wet	34.6	East	Edge	40.8	Flat	Centre	34	Flat	East	37.7	6.8	6.2	-0.6	3.1	-6.2	0.6	-3.1
OSullivan Beach	February 9	7	25	No	12:47pm	38	0	Lower	Diloma concamerata	Wet	32.6	East	Flat	39.3	Flat	Centre	29.4	Flat	East	34.8	9.9	6.7	-3.2	2.2	-6.7	3.2	-2.2
OSullivan Beach	February 9	7	32	Yes	1:02pm	38	0	Lower	Diloma concamerata	Dry	34.4	West	Flat	40.6	Flat	East	32.3	Flat	West	37.2	8.3	6.2	-2.1	2.8	-6.2	2.1	-2.8
OSullivan Beach	February 9	7	39	Yes	1:13pm	38	0	Lower	Diloma concamerata	Wet	34.5	West	Flat	35.7	Edge	West	32.5	Flat	East	34	3.2	1.2	-2	-0.5	-1.2	2	0.5
OSullivan Beach	February 9	7	41	No	1:15pm	38	0	Lower	Diloma concamerata	Wet	34.3	Centre	Flat	37.8	Edge	Centre	32.1	Flat	Centre	34.8	5.7	3.5	-2.2	0.5	-3.5	2.2	-0.5
OSullivan Beach	February 9	7	42	No	1:16pm	38	0	Lower	Diloma concamerata	Wet	37.7	Centre	Flat	40.5	Flat	Centre	35.7	Flat	East	38.2	4.8	2.8	-2	0.5	-2.8	2	-0.5
OSullivan Beach	February 9	7	43	Yes	1:17pm	38	0	Lower	Diloma concamerata	Wet	37.7	Centre	Flat	44.4	Edge	West	35.7	Flat	Centre	39.2	8.7	6.7	-2	1.5	-6.7	2	-1.5
OSullivan Beach	February 9	7	46	Yes	1:21pm	38	0	Lower	Diloma concamerata	Wet	33.6	West	Flat	38.8	Edge	East	32.3	Flat	West	35.2	6.5	5.2	-1.3	1.6	-5.2	1.3	-1.6
OSullivan Beach	February 9	7	47	Yes	1:25pm	38	0	Lower	Diloma concamerata	Wet	37.5	Centre	Flat	42.2	Edge	West	33.2	Edge	East	38.1	9	4.7	-4.3	0.6	-4.7	4.3	-0.6
OSullivan Beach	February 9	7	48	Yes	1:28pm	38	0	Lower	Diloma concamerata	Wet	34.4	Centre	Flat	39.4	Edge	Centre	31.9	Edge	East	35.1	7.5	5	-2.5	0.7	-5	2.5	-0.7
OSullivan Beach	February 9	7	49	Yes	1:29pm	38	0	Lower	Diloma concamerata	Wet	35.7	East	Edge	40.2	Edge	West	33.7	Flat	East	36.2	6.5	4.5	-2	0.5	-4.5	2	-0.5
OSullivan Beach	February 9	7	52	Yes	1:34pm	38	0	Lower	Diloma concamerata	Wet	34.3	Centre	Flat	38.9	Edge	East	32.1	Flat	East	35.1	6.8	4.6	-2.2	0.8	-4.6	2.2	-0.8
OSullivan Beach	February 9	7	54	Yes	1:38pm	38	0	Lower	Diloma concamerata	Wet	34.3	Centre	Drop	40.1	Flat	Centre	32	Flat	Centre	36.2	8.1	5.8	-2.3	1.9	-5.8	2.3	-1.9
OSullivan Beach	February 9	7	57	Yes	1:43pm	38	0	Lower	Diloma concamerata	Wet	38.6	Centre	Flat	41.3	Depression	Centre	35.2	Peak	Centre	38.6	6.1	2.7	-3.4	0	-2.7	3.4	0
OSullivan Beach	February 9	7	58	Yes	1:54pm	38	0	Lower	Diloma concamerata	Wet	30.2	Centre	Depression	35.5	Edge	West	28.7	Flat	East	31.7	6.8	5.3	-1.5	1.5	-5.3	1.5	-1.5
OSullivan Beach	February 9	7	59	Yes	1:56pm	38	0	Lower	Diloma concamerata	Wet	38	Centre	Flat	41.1	Edge	West	32.9	Flat	East	36.8	8.2	3.1	-5.1	-1.2	-3.1	5.1	1.2
OSullivan Beach	February 9	7	60	Yes	1:57pm	38	0	Lower	Diloma concamerata	Wet	35.3	East	Edge	41.4	Edge	West	33.3	Flat	East	36.3	8.1	6.1	-2	1	-6.1	2	-1
OSullivan Beach	February 9	7	61	Yes	1:58pm	38	0	Lower	Diloma concamerata	Wet	34.3	Centre	Flat	40.2	Edge	East	31.1	Flat	West	35.3	9.1	5.9	-3.2	1	-5.9	3.2	-1
OSullivan Beach	February 9	7	62	Yes	2:00pm	38	0	Lower	Diloma concamerata	Wet	35	East	Flat	41.7	Flat	West	34.2	Flat	East	36.8	7.5	6.7	-0.8	1.8	-6.7	0.8	-1.8
OSullivan Beach	February 9	7	63	Yes	2:02pm	38	0	Lower	Diloma concamerata	Wet	35.6	West	Edge	39	Edge	East	31	Flat	Centre	34.6	8	3.4	-4.6	-1	-3.4	4.6	1
OSullivan Beach	February 9	7	64	Yes	2:03pm	38	0	Lower	Diloma concamerata	Wet	35.8	Centre	Flat	40.5	Edge	Centre	34.2	Flat	Centre	37.3	6.3	4.7	-1.6	1.5	-4.7	1.6	-1.5
OSullivan Beach	February 9	7	65	Yes	2:04pm	38	0	Lower	Diloma concamerata	Wet	34.8	Centre	Flat	40.7	Flat	East	32.9	Flat	East	35.4	7.8	5.9	-1.9	0.6	-5.9	1.9	-0.6
OSullivan Beach	February 9	7	66	Yes	2:06pm	38	0	Lower	Diloma concamerata	Wet	34.5	Centre	Flat	41.6	Flat	West	32.2	Flat	Centre	35.5	9.4	7.1	-2.3	1	-7.1	2.3	-1
OSullivan Beach	February 9	7	67	Yes	2:07pm	38	0	Lower	Diloma concamerata	Wet	36.5	Centre	Edge	38.7	Edge	East	33.6	Edge	West	36.5	5.1	2.2	-2.9	0	-2.2	2.9	0
OSullivan Beach	February 9	7	68	Yes	2:08pm	38	0	Lower	Diloma concamerata	Wet	36.5	Centre	Flat	43	Edge	West	34.6	Edge	East	37.8	8.4	6.5	-1.9	1.3	-6.5	1.9	-1.3
OSullivan Beach	February 9	7	2	Yes	12:02pm	38	1	Lower	Bembicium nanum	Dry	37.5	Centre	Flat	41.8	Edge	East	30.8	Flat	Centre	35.6	11	4.3	-6.7	-1.9	-4.3	6.7	1.9
OSullivan Beach	February 9	7	5	No	12:09pm	38	1	Lower	Bembicium nanum	Wet	39.3	East	Flat	41.1	Edge	East	33	Flat	Centre	36.2	8.1	1.8	-6.3	-3.1	-1.8	6.3	3.1
OSullivan Beach	February 9	7	6	Yes	12:11pm	38	1	Lower	Bembicium nanum	Dry	39.8	East	Flat	43.7	Flat	East	34.3	Depression	East	39.1	9.4	3.9	-5.5	-0.7	-3.9	5.5	0.7
OSullivan Beach	February 9	7	10	No	12:16pm	38	1	Lower	Bembicium nanum	Dry	42.8	Centre	Flat	45.3	Flat	Centre	34	Flat	Centre	40.1	11.3	2.5	-8.8	-2.7	-2.5	8.8	2.7
OSullivan Beach	February 9	7	11	Yes	12:17pm	38	1	Lower	Bembicium nanum	Dry	36	East	Flat	42	Edge	East	30.8	Flat	Centre	36	11.2	6	-5.2	0	-6	5.2	0
OSullivan Beach	February 9	7	12	Yes	12:19pm	38	1	Lower	Bembicium nanum	Dry	42.2	Centre	Flat	43.7	Edge	West	34.6	Flat	Centre	38.7	9.1	1.5	-7.6	-3.5	-1.5	7.6	3.5
OSullivan Beach	February 9	7	14	Yes	12:21pm	38	1	Lower	Bembicium nanum	Dry	41.5	West	Flat	46	Depression	East	34.4	Flat	Centre	39.9	11.6	4.5	-7.1	-1.6	-4.5	7.1	1.6
OSullivan Beach	February 9	7	15	Yes	12:23pm	38	1	Lower	Bembicium nanum	Dry	34.9	West	Edge	40.3	Flat	Centre	33	Flat	Centre	35.7	7.3	5.4	-1.9	0.8	-5.4	1.9	-0.8
OSullivan Beach	February 9	7	18	No	12:34pm	38	0	Lower	Bembicium nanum	Dry	38.6	Centre	Flat	44.4	Edge	West	34.9	Flat	Centre	37.8	9.5	5.8	-3.7	-0.8	-5.8	3.7	0.8
OSullivan Beach	February 9	7	20	Yes	12:39pm	38	0	Lower	Bembicium nanum	Dry	40.8	Centre	Edge	45.3	Edge	Centre	33.3	Flat	Centre	37.7	12	4.5	-7.5	-3.1	-4.5	7.5	3.1
OSullivan Beach	February 9	7	26	No	12:48pm	38	0	Lower	Bembicium nanum	Dry	36.4	Centre	Flat	40.4	Flat	West	33.4	Flat	East	36.7	7	4	-3	0.3	-4	3	-0.3
OSullivan Beach	February 9	7	31	Yes	12:56pm	38	0	Lower	Bembicium nanum	Dry	38.9	Centre	Drop	42.7	Flat	Centre	33.3	Peak	Centre	37.7	9.4	3.8	-5.6	-1.2	-3.8	5.6	1.2
OSullivan Beach	February 9	7	33	Yes	1:04pm	38	0	Lower	Bembicium nanum	Dry	45.4	East	Edge	49.2	Flat	West	38.5	Flat	Centre	43.4	10.7	3.8	-6.9	-2	-3.8	6.9	2
OSullivan Beach	February 9	7	37	Yes	1:11pm	38	0	Lower	Bembicium nanum	Dry	42.1	Centre	Flat	47	Edge	Centre	39.3	Flat	Centre	42.3	7.7	4.9	-2.8	0.2	-4.9	2.8	-0.2
OSullivan Beach	February 9	7	38	Yes	1:12pm	38	0	Lower	Bembicium nanum	Dry	39.6	Centre	Flat	47	Edge	East	39.3	Flat	Centre	42	7.7	7.4	-0.3	2.4	-7.4	0.3	-2.4
OSullivan Beach	February 9	7	50	Yes	1:32pm	38	0	Lower	Bembicium nanum	Dry	44.3	East	Flat	50.2	Flat	Centre	39.1	Flat	East	43.6	11.1	5.9	-5.2	-0.7	-5.9	5.2	0.7
OSullivan Beach	February 9	7	51	Yes	1:33pm	38	0	Lower	Bembicium nanum	Dry	41.2	West	Edge	45.3	Edge	Centre	36.1	Flat	East	39.8	9.2	4.1	-5.1	-1.4	-4.1	5.1	1.4
OSullivan Beach	February 9	7	53	Yes	1:37pm	38	0	Lower	Bembicium nanum	Dry	42.6	Centre	Flat	47.8	Depression	Centre	38.9	Flat	West	43.1	8.9	5.2	-3.7	0.5	-5.2	3.7	-0.5
OSullivan Beach	February 9	7	55	Yes	1:39pm	38	0	Lower	Bembicium nanum	Dry	41.5	Centre	Depression	45.3	Depression	East	36.7	Flat	Centre	40.5	8.6	3.8	-4.8	-1	-3.8	4.8	1
OSullivan Beach	February 9	7	56	Yes	1:41pm	38	0	Lower	Bembicium nanum	Dry	49.4	Centre	Flat	51.4	Flat	West	45.6	Flat	Centre	48.1	5.8	2	-3.8	-1.3	-2	3.8	1.3
OSullivan Beach	February 9	7	69	Yes	2:20pm	38	0	Lower	Bembicium nanum	Dry	40.5	West	Edge	49.2	Flat	East	40.1	Edge	West	44.1	9.1	8.7	-0.4	3.6	-8.7	0.4	-3.6
OSullivan Beach	February 9	7	70	Yes	2:22pm	38	0	Upper	Bembicium nanum	Dry	43.9	Centre	Flat	50	Edge	Centre	42.9	Flat	Centre	46.1	7.1	6.1	-1	2.2	-6.1	1	-2.2
OSullivan Beach	February 9	7	71	Yes	2:23pm	38	0	Upper	Bembicium nanum	Dry	46.6	Centre	Flat	49.3	Flat	West	43.1	Flat	Centre	46.4	6.2	2.7	-3.5	-0.2	-2.7	3.5	0.2
OSullivan Beach	February 9	7	72	Yes	2:24pm	38	0	Upper	Bembicium nanum	Dry	45.1	East	Flat	49	Edge	East	43.4	Flat	Centre	45.9	5.6	3.9	-1.7	0.8	-3.9	1.7	-0.8
OSullivan Beach	February 9	7	73	Yes	2:25pm	38	0	Upper	Bembicium nanum	Dry	47.2	Centre	Flat	51.8	Flat	Centre	44.6	Depression	West	46.9	7.2	4.6	-2.6	-0.3	-4.6	2.6	0.3
OSullivan Beach	February 9	7	74	Yes	2:26pm	38	0	Upper	Bembicium nanum	Dry	44.1	West	Flat	48.8	Edge	East	41	Flat	Centre	44.6	7.8	4.7	-3.1	0.5	-4.7	3.1	-0.5
OSullivan Beach	February 9	7	75	Yes	2:28pm	38	0	Upper	Bembicium nanum	Dry	44.5	Centre	Flat	49.1	Flat	West	43.1	Flat	Centre	45.1	6	4.6	-1.4	0.6	-4.6	1.4	-0.6
OSullivan Beach	February 9	7	76	Yes	2:29pm	38	0	Upper	Bembicium nanum	Dry	44.7	West	Flat	49.4	Edge	East	36.3	Peak	Centre	45.2	13.1	4.7	-8.4	0.5	-4.7	8.4	-0.5
OSullivan Beach	February 9	7	77	Yes	2:30pm	38	0	Upper	Bembicium nanum	Dry	48.8	West	Flat	49.7	Flat	West	42.8	Flat	Centre	45.6	6.9	0.9	-6	-3.2	-0.9	6	3.2
OSullivan Beach	February 9	7	78	Yes	2:31pm	38	0	Upper	Bembicium nanum	Dry	42	Centre	Flat	48.3	Edge	Centre	40.5	Flat	Centre	42.9	7.8	6.3	-1.5	0.9	-6.3	1.5	-0.9

## Sheet: PRIMER thermal mosaics
Target temp	Max temp	Min temp	Average temp	Range	Target - max	Target - min	Target - average		Seashore	Rock	Date	Unique	Time	Air temp	Oktas	Zone	Species	Surface condition
27.4	35.8	26.2	29.2	9.6	-8.4	1.2	-1.8		Marino Rocks	Grey siltstone	December 16	Yes	12:41pm	24	0	Lower	Nerita atramentosa	Wet
30.8	38.3	28.3	33.8	10	-7.5	2.5	-3		Marino Rocks	Grey siltstone	December 16	Yes	12:43pm	24	0	Lower	Nerita atramentosa	Wet
31.7	37.7	26.9	31.1	10.8	-6	4.8	0.6		Marino Rocks	Grey siltstone	December 16	Yes	12:47pm	24	0	Lower	Nerita atramentosa	Wet
29.7	36	25.6	30.8	10.4	-6.3	4.1	-1.1		Marino Rocks	Grey siltstone	December 16	Yes	12:48pm	24	0	Lower	Nerita atramentosa	Wet
31.9	41.1	27.3	32.1	13.8	-9.2	4.6	-0.2		Marino Rocks	Grey siltstone	December 16	Yes	12:51pm	24	0	Lower	Nerita atramentosa	Dry
31.8	37.8	26.1	32	11.7	-6	5.7	-0.2		Marino Rocks	Grey siltstone	December 16	Yes	12:59pm	24	0	Lower	Nerita atramentosa	Wet
34.7	40.5	28.3	34.3	12.2	-5.8	6.4	0.4		Marino Rocks	Grey siltstone	December 16	Yes	1:06pm	24	0	Lower	Nerita atramentosa	Wet
31.8	37.2	26.3	32.2	10.9	-5.4	5.5	-0.4		Marino Rocks	Grey siltstone	December 16	Yes	1:02pm	24	0	Lower	Nerita atramentosa	Dry
31.3	40.2	30.2	34.7	10	-8.9	1.1	-3.4		Marino Rocks	Grey siltstone	December 16	Yes	1:04pm	24	0	Lower	Nerita atramentosa	Wet
32.1	37.5	23.4	30.8	14.1	-5.4	8.7	1.3		Marino Rocks	Grey siltstone	December 16	Yes	1:09pm	24	0	Lower	Nerita atramentosa	Dry
31.6	38.9	25.8	33.1	13.1	-7.3	5.8	-1.5		Marino Rocks	Grey siltstone	December 16	Yes	1:11pm	24	0	Lower	Nerita atramentosa	Dry
27.6	37.1	25	29.9	12.1	-9.5	2.6	-2.3		Marino Rocks	Grey siltstone	December 16	Yes	1:12pm	24	0	Lower	Nerita atramentosa	Wet
30.1	33.2	25.4	28.7	7.8	-3.1	4.7	1.4		Marino Rocks	Grey siltstone	December 16	Yes	1:14pm	24	0	Lower	Nerita atramentosa	Wet
30.1	42.6	27	34.1	15.6	-12.5	3.1	-4		Marino Rocks	Grey siltstone	December 16	Yes	1:17pm	24	0	Lower	Nerita atramentosa	Wet
37.4	41.9	31.8	32.5	10.1	-4.5	5.6	4.9		Marino Rocks	Grey siltstone	December 16	Yes	1:18pm	24	0	Lower	Nerita atramentosa	Dry
30.1	39.7	22.9	30.8	16.8	-9.6	7.2	-0.7		Marino Rocks	Grey siltstone	December 16	Yes	1:20pm	24	0	Lower	Nerita atramentosa	Wet
30.8	40	25.2	31	14.8	-9.2	5.6	-0.2		Marino Rocks	Grey siltstone	December 16	Yes	1:21pm	24	0	Lower	Nerita atramentosa	Wet
31.8	40.3	26	32	14.3	-8.5	5.8	-0.2		Marino Rocks	Grey siltstone	December 16	Yes	1:22pm	24	0	Lower	Nerita atramentosa	Dry
32	36.3	29.7	32	6.6	-4.3	2.3	0		Marino Rocks	Grey siltstone	December 16	Yes	1:36pm	25	0	Lower	Nerita atramentosa	Wet
27.2	35	26.4	29.4	8.6	-7.8	0.8	-2.2		Marino Rocks	Grey siltstone	December 16	Yes	1:37pm	25	0	Lower	Nerita atramentosa	Wet
33.5	39.7	29.2	33.5	10.5	-6.2	4.3	0		Marino Rocks	Grey siltstone	December 16	Yes	1:39pm	25	0	Lower	Nerita atramentosa	Wet
32.8	43.4	28.8	35.2	14.6	-10.6	4	-2.4		Marino Rocks	Grey siltstone	December 16	Yes	1:40pm	25	0	Lower	Nerita atramentosa	Dry
37.3	42	28.8	36.9	13.2	-4.7	8.5	0.4		Marino Rocks	Grey siltstone	December 16	Yes	1:43pm	25	0	Lower	Nerita atramentosa	Dry
34.3	41.8	30.9	36	10.9	-7.5	3.4	-1.7		Marino Rocks	Grey siltstone	December 16	Yes	1:44pm	25	0	Lower	Nerita atramentosa	Dry
32.2	37.9	28.8	32.4	9.1	-5.7	3.4	-0.2		Marino Rocks	Grey siltstone	December 16	Yes	1:46pm	25	0	Lower	Nerita atramentosa	Wet
35	41.6	33.6	36.6	8	-6.6	1.4	-1.6		Marino Rocks	Grey siltstone	December 16	Yes	1:50pm	25	0	Lower	Nerita atramentosa	Dry
31.4	40.9	30.5	35.1	10.4	-9.5	0.9	-3.7		Marino Rocks	Grey siltstone	December 16	Yes	1:51pm	25	0	Lower	Nerita atramentosa	Wet
35.6	39.8	28.4	33.8	11.4	-4.2	7.2	1.8		Marino Rocks	Grey siltstone	December 16	Yes	1:53pm	25	0	Lower	Nerita atramentosa	Wet
35.3	42.8	29	36	13.8	-7.5	6.3	-0.7		Marino Rocks	Grey siltstone	December 16	Yes	1:55pm	25	0	Lower	Nerita atramentosa	Wet
34.3	42.4	29.8	36.8	12.6	-8.1	4.5	-2.5		Marino Rocks	Grey siltstone	December 16	Yes	1:56pm	25	0	Lower	Nerita atramentosa	Dry
31.6	38.3	28.3	33.8	10	-6.7	3.3	-2.2		Marino Rocks	Grey siltstone	December 16	No	12:43pm	24	0	Lower	Diloma concamerata	Wet
27.5	36	25.6	30.8	10.4	-8.5	1.9	-3.3		Marino Rocks	Grey siltstone	December 16	No	12:48pm	24	0	Lower	Diloma concamerata	Wet
32.7	40.2	30.2	34.7	10	-7.5	2.5	-2		Marino Rocks	Grey siltstone	December 16	No	1:04pm	24	0	Lower	Diloma concamerata	Wet
32	37.1	25	29.9	12.1	-5.1	7	2.1		Marino Rocks	Grey siltstone	December 16	No	1:12pm	24	0	Lower	Diloma concamerata	Wet
29.9	40	25.2	31	14.8	-10.1	4.7	-1.1		Marino Rocks	Grey siltstone	December 16	No	1:21pm	24	0	Lower	Diloma concamerata	Wet
29.4	40.3	26	32	14.3	-10.9	3.4	-2.6		Marino Rocks	Grey siltstone	December 16	No	1:22pm	24	0	Lower	Diloma concamerata	Dry
27.4	35	26.4	29.4	8.6	-7.6	1	-2		Marino Rocks	Grey siltstone	December 16	No	1:37pm	24	0	Lower	Diloma concamerata	Wet
29.2	39.7	29.2	33.5	10.5	-10.5	0	-4.3		Marino Rocks	Grey siltstone	December 16	No	1:39pm	25	0	Lower	Diloma concamerata	Wet
29.2	37.9	28.8	32.4	9.1	-8.7	0.4	-3.2		Marino Rocks	Grey siltstone	December 16	No	1:46pm	25	0	Lower	Diloma concamerata	Wet
32.8	42.8	29	36	13.8	-10	3.8	-3.2		Marino Rocks	Grey siltstone	December 16	No	1:55pm	25	0	Lower	Diloma concamerata	Wet
29.3	37.1	25.7	31.2	11.4	-7.8	3.6	-1.9		Marino Rocks	Grey siltstone	December 16	Yes	1:58pm	25	0	Lower	Diloma concamerata	Wet
30.1	35.9	22.7	31.6	13.2	-5.8	7.4	-1.5		Marino Rocks	Grey siltstone	December 16	Yes	2:01pm	25	0	Lower	Diloma concamerata	Wet
31.3	36.5	30.1	33	6.4	-5.2	1.2	-1.7		Marino Rocks	Grey siltstone	December 16	Yes	2:03pm	25	0	Lower	Diloma concamerata	Wet
35.8	39.8	32.6	35.5	7.2	-4	3.2	0.3		Marino Rocks	Grey siltstone	December 16	Yes	2:05pm	25	0	Lower	Diloma concamerata	Wet
32.7	37.8	31.9	34.3	5.9	-5.1	0.8	-1.6		Marino Rocks	Grey siltstone	December 16	Yes	2:06pm	25	0	Lower	Diloma concamerata	Wet
31.9	39.6	27	32.5	12.6	-7.7	4.9	-0.6		Marino Rocks	Grey siltstone	December 16	Yes	2:07pm	25	0	Lower	Diloma concamerata	Wet
27.9	34.6	26.6	30	8	-6.7	1.3	-2.1		Marino Rocks	Grey siltstone	December 16	Yes	2:10pm	25	0	Lower	Diloma concamerata	Wet
28.9	36.3	28.1	31.3	8.2	-7.4	0.8	-2.4		Marino Rocks	Grey siltstone	December 16	Yes	2:12pm	25	0	Lower	Diloma concamerata	Wet
30.1	33.7	27.6	30.3	6.1	-3.6	2.5	-0.2		Marino Rocks	Grey siltstone	December 16	Yes	2:15pm	25	0	Lower	Diloma concamerata	Wet
29.7	38.2	27.8	32.9	10.4	-8.5	1.9	-3.2		Marino Rocks	Grey siltstone	December 16	Yes	2:34pm	25	0	Upper	Diloma concamerata	Dry
42.7	46.9	35.9	39.6	11	-4.2	6.8	3.1		Marino Rocks	Grey siltstone	December 16	Yes	3:07pm	26	0	Upper	Diloma concamerata	Dry
32.6	42.4	30.6	34.7	11.8	-9.8	2	-2.1		Marino Rocks	Grey siltstone	December 16	Yes	3:31pm	26	0	Upper	Diloma concamerata	Wet
36.7	41.3	33.6	37.2	7.7	-4.6	3.1	-0.5		Marino Rocks	Grey siltstone	December 16	Yes	12:55pm	24	0	Lower	Bembicium nanum	Dry
36.1	38.5	33.1	35.2	5.4	-2.4	3	0.9		Marino Rocks	Grey siltstone	December 16	Yes	1:01pm	24	0	Lower	Bembicium nanum	Dry
38.4	43.4	28.8	35.2	14.6	-5	9.6	3.2		Marino Rocks	Grey siltstone	December 16	No	1:40pm	25	0	Lower	Bembicium nanum	Dry
37.5	42.8	34.6	38.3	8.2	-5.3	2.9	-0.8		Marino Rocks	Grey siltstone	December 16	Yes	2:29pm	25	0	Upper	Bembicium nanum	Dry
41.7	47.8	41.2	43.3	6.6	-6.1	0.5	-1.6		Marino Rocks	Grey siltstone	December 16	Yes	2:35pm	26	0	Upper	Bembicium nanum	Dry
38.3	45	35.4	39	9.6	-6.7	2.9	-0.7		Marino Rocks	Grey siltstone	December 16	Yes	2:37pm	26	0	Upper	Bembicium nanum	Dry
41.9	47.7	39.7	42.8	8	-5.8	2.2	-0.9		Marino Rocks	Grey siltstone	December 16	Yes	2:39pm	26	0	Upper	Bembicium nanum	Dry
38	41.7	32.8	38.5	8.9	-3.7	5.2	-0.5		Marino Rocks	Grey siltstone	December 16	Yes	2:46pm	26	0	Upper	Bembicium nanum	Dry
38	42.4	33.2	38.4	9.2	-4.4	4.8	-0.4		Marino Rocks	Grey siltstone	December 16	Yes	2:47pm	26	0	Upper	Bembicium nanum	Dry
39.4	44.1	36.2	40.5	7.9	-4.7	3.2	-1.1		Marino Rocks	Grey siltstone	December 16	Yes	2:48pm	26	0	Upper	Bembicium nanum	Dry
34.6	45	33.3	37.9	11.7	-10.4	1.3	-3.3		Marino Rocks	Grey siltstone	December 16	Yes	2:50pm	26	0	Upper	Bembicium nanum	Dry
34.5	44.8	32.5	39	12.3	-10.3	2	-4.5		Marino Rocks	Grey siltstone	December 16	Yes	3:01pm	26	0	Upper	Bembicium nanum	Dry
41.1	45.8	39.2	41.6	6.6	-4.7	1.9	-0.5		Marino Rocks	Grey siltstone	December 16	Yes	3:05pm	26	0	Upper	Bembicium nanum	Dry
41.6	46.9	36	39.6	10.9	-5.3	5.6	2		Marino Rocks	Grey siltstone	December 16	No	3:07pm	26	0	Upper	Bembicium nanum	Dry
41.3	44.8	35.9	39.1	8.9	-3.5	5.4	2.2		Marino Rocks	Grey siltstone	December 16	Yes	3:11pm	26	0	Upper	Bembicium nanum	Dry
35.9	42.9	35.9	40.2	7	-7	0	-4.3		Marino Rocks	Grey siltstone	December 16	Yes	3:13pm	26	0	Upper	Bembicium nanum	Dry
39.7	44.4	35.4	39.5	9	-4.7	4.3	0.2		Marino Rocks	Grey siltstone	December 16	Yes	3:15pm	26	0	Upper	Bembicium nanum	Dry
41.9	47.2	40.9	43	6.3	-5.3	1	-1.1		Marino Rocks	Grey siltstone	December 16	Yes	3:19pm	26	0	Upper	Bembicium nanum	Dry
42.6	45.3	36.4	40.6	8.9	-2.7	6.2	2		Marino Rocks	Grey siltstone	December 16	Yes	3:25pm	26	0	Upper	Bembicium nanum	Dry
36.4	40.9	32.3	35.8	8.6	-4.5	4.1	0.6		Marino Rocks	Grey siltstone	December 16	Yes	3:26pm	26	0	Upper	Bembicium nanum	Dry
42.9	45.8	38	42.1	7.8	-2.9	4.9	0.8		Marino Rocks	Grey siltstone	December 16	Yes	3:28pm	26	0	Upper	Bembicium nanum	Dry
41	43.3	38.5	39.9	4.8	-2.3	2.5	1.1		Marino Rocks	Grey siltstone	December 16	Yes	3:30pm	26	0	Upper	Bembicium nanum	Dry
41.3	50.2	40.3	45.4	9.9	-8.9	1	-4.1		Marino Rocks	Grey siltstone	December 16	Yes	3:34pm	26	0	Upper	Bembicium nanum	Dry
41.5	44.5	36.9	40.9	7.6	-3	4.6	0.6		Marino Rocks	Grey siltstone	December 16	Yes	3:35pm	26	0	Upper	Bembicium nanum	Dry
41.2	45.5	36.2	40.3	9.3	-4.3	5	0.9		Marino Rocks	Grey siltstone	December 16	Yes	3:37pm	26	0	Upper	Bembicium nanum	Dry
45	48.4	40.3	44.3	8.1	-3.4	4.7	0.7		Marino Rocks	Grey siltstone	December 16	Yes	3:37pm	26	0	Upper	Bembicium nanum	Dry
43.7	45.5	39.8	43.5	5.7	-1.8	3.9	0.2		Marino Rocks	Grey siltstone	December 16	Yes	3:38pm	26	0	Upper	Bembicium nanum	Dry
44.8	47.8	35.5	42.5	12.3	-3	9.3	2.3		Marino Rocks	Grey siltstone	December 16	Yes	3:40pm	26	0	Upper	Bembicium nanum	Dry
37.5	43.3	31.4	37.1	11.9	-5.8	6.1	0.4		Marino Rocks	Grey siltstone	December 16	Yes	3:42pm	26	0	Upper	Bembicium nanum	Dry
43.3	47.4	41.6	43.6	5.8	-4.1	1.7	-0.3		Marino Rocks	Grey siltstone	December 16	Yes	3:45pm	26	0	Upper	Bembicium nanum	Dry
30.7	36.3	24.1	30.8	12.2	-5.6	6.6	-0.1		OSullivan Beach	Quartzite	December 18	Yes	2:24pm	25	0	Lower	Nerita atramentosa	Dry
29.4	34.8	27.6	31	7.2	-5.4	1.8	-1.6		OSullivan Beach	Quartzite	December 18	Yes	2:28pm	25	0	Lower	Nerita atramentosa	Wet
28	33.5	27.7	30.1	5.8	-5.5	0.3	-2.1		OSullivan Beach	Quartzite	December 18	Yes	2:37pm	25	0	Lower	Nerita atramentosa	Dry
31.7	34.9	26.2	30.9	8.7	-3.2	5.5	0.8		OSullivan Beach	Quartzite	December 18	Yes	2:38pm	25	0	Lower	Nerita atramentosa	Dry
27	34.9	23.6	28.3	11.3	-7.9	3.4	-1.3		OSullivan Beach	Quartzite	December 18	Yes	2:39pm	25	0	Lower	Nerita atramentosa	Dry
27.7	36.3	24.7	30.3	11.6	-8.6	3	-2.6		OSullivan Beach	Quartzite	December 18	Yes	2:41pm	25	0	Lower	Nerita atramentosa	Dry
33.9	37.1	29.1	32	8	-3.2	4.8	1.9		OSullivan Beach	Quartzite	December 18	Yes	2:45pm	25	0	Lower	Nerita atramentosa	Dry
28.7	35.3	24.8	29.8	10.5	-6.6	3.9	-1.1		OSullivan Beach	Quartzite	December 18	Yes	2:46pm	25	0	Lower	Nerita atramentosa	Wet
32.3	37.2	22.8	31.1	14.4	-4.9	9.5	1.2		OSullivan Beach	Quartzite	December 18	Yes	2:47pm	25	0	Lower	Nerita atramentosa	Wet
29.3	36.8	23.7	31.4	13.1	-7.5	5.6	-2.1		OSullivan Beach	Quartzite	December 18	Yes	2:50pm	25	0	Lower	Nerita atramentosa	Wet
28	34.3	24.6	28.3	9.7	-6.3	3.4	-0.3		OSullivan Beach	Quartzite	December 18	Yes	2:52pm	25	0	Lower	Nerita atramentosa	Wet
26	33.4	18.5	26	14.9	-7.4	7.5	0		OSullivan Beach	Quartzite	December 18	Yes	2:56pm	25	0	Lower	Nerita atramentosa	Wet
28.8	34	24.5	28.2	9.5	-5.2	4.3	0.6		OSullivan Beach	Quartzite	December 18	Yes	2:58pm	25	0	Lower	Nerita atramentosa	Wet
29.4	33.6	26.7	29.7	6.9	-4.2	2.7	-0.3		OSullivan Beach	Quartzite	December 18	Yes	3:01pm	25	0	Lower	Nerita atramentosa	Dry
26.8	34.6	24.9	29.8	9.7	-7.8	1.9	-3		OSullivan Beach	Quartzite	December 18	Yes	3:02pm	25	0	Lower	Nerita atramentosa	Dry
29.2	30.6	23.9	27.1	6.7	-1.4	5.3	2.1		OSullivan Beach	Quartzite	December 18	Yes	3:03pm	25	0	Lower	Nerita atramentosa	Wet
31.4	35.7	24.9	30.5	10.8	-4.3	6.5	0.9		OSullivan Beach	Quartzite	December 18	Yes	3:13pm	25	0	Lower	Nerita atramentosa	Dry
31	39.1	26.7	32.5	12.4	-8.1	4.3	-1.5		OSullivan Beach	Quartzite	December 18	Yes	3:14pm	25	0	Lower	Nerita atramentosa	Dry
31.9	38.7	25.5	31.6	13.2	-6.8	6.4	0.3		OSullivan Beach	Quartzite	December 18	Yes	3:15pm	25	0	Lower	Nerita atramentosa	Dry
30.2	37.2	25.6	30.8	11.6	-7	4.6	-0.6		OSullivan Beach	Quartzite	December 18	Yes	3:17pm	25	0	Lower	Nerita atramentosa	Dry
27.5	37.9	24.6	31.1	13.3	-10.4	2.9	-3.6		OSullivan Beach	Quartzite	December 18	Yes	3:18pm	25	0	Lower	Nerita atramentosa	Dry
26.8	31.9	20.1	26.9	11.8	-5.1	6.7	-0.1		OSullivan Beach	Quartzite	December 18	Yes	3:19pm	25	0	Lower	Nerita atramentosa	Wet
29.3	31.1	22.4	27.7	8.7	-1.8	6.9	1.6		OSullivan Beach	Quartzite	December 18	Yes	3:21pm	25	0	Lower	Nerita atramentosa	Dry
23.3	28.9	22.5	25.1	6.4	-5.6	0.8	-1.8		OSullivan Beach	Quartzite	December 18	Yes	3:23pm	25	0	Lower	Nerita atramentosa	Dry
29.6	33.3	24.1	29.2	9.2	-3.7	5.5	0.4		OSullivan Beach	Quartzite	December 18	Yes	3:24pm	25	0	Lower	Nerita atramentosa	Wet
27.9	32.5	21.1	27.1	11.4	-4.6	6.8	0.8		OSullivan Beach	Quartzite	December 18	Yes	3:25pm	25	0	Lower	Nerita atramentosa	Wet
28.9	31.6	22.1	27.6	9.5	-2.7	6.8	1.3		OSullivan Beach	Quartzite	December 18	Yes	3:27pm	25	0	Lower	Nerita atramentosa	Wet
25.9	31.3	21.9	26.6	9.4	-5.4	4	-0.7		OSullivan Beach	Quartzite	December 18	Yes	3:28pm	25	0	Lower	Nerita atramentosa	Dry
30.6	33.9	26.7	29.9	7.2	-3.3	3.9	0.7		OSullivan Beach	Quartzite	December 18	Yes	3:29pm	25	0	Lower	Nerita atramentosa	Wet
28.2	32	22.3	28.1	9.7	-3.8	5.9	0.1		OSullivan Beach	Quartzite	December 18	Yes	3:31pm	25	0	Lower	Nerita atramentosa	Dry
29.9	34.8	27.6	31	7.2	-4.9	2.3	-1.1		OSullivan Beach	Quartzite	December 18	No	2:28pm	25	0	Lower	Diloma concamerata	Wet
29.2	33.5	27.7	30.1	5.8	-4.3	1.5	-0.9		OSullivan Beach	Quartzite	December 18	No	2:37pm	25	0	Lower	Diloma concamerata	Dry
28.4	34.9	23.6	28.3	11.3	-6.5	4.8	0.1		OSullivan Beach	Quartzite	December 18	No	2:39pm	25	0	Lower	Diloma concamerata	Dry
29.5	37.2	25.2	29.8	12	-7.7	4.3	-0.3		OSullivan Beach	Quartzite	December 18	Yes	2:42pm	25	0	Lower	Diloma concamerata	Dry
30.3	35.6	26.3	29.6	9.3	-5.3	4	0.7		OSullivan Beach	Quartzite	December 18	Yes	2:44pm	25	0	Lower	Diloma concamerata	Wet
28.3	35.3	24.8	29.8	10.5	-7	3.5	-1.5		OSullivan Beach	Quartzite	December 18	No	2:46pm	25	0	Lower	Diloma concamerata	Dry
28.9	37.2	22.8	31.1	14.4	-8.3	6.1	-2.2		OSullivan Beach	Quartzite	December 18	No	2:47pm	25	0	Lower	Diloma concamerata	Wet
29.4	31.9	25.3	27.8	6.6	-2.5	4.1	1.6		OSullivan Beach	Quartzite	December 18	Yes	2:49pm	25	0	Lower	Diloma concamerata	Wet
29.6	36.8	23.7	31.4	13.1	-7.2	5.9	-1.8		OSullivan Beach	Quartzite	December 18	No	2:50pm	25	0	Lower	Diloma concamerata	Wet
27.1	34.3	24.6	28.3	9.7	-7.2	2.5	-1.2		OSullivan Beach	Quartzite	December 18	No	2:52pm	25	0	Lower	Diloma concamerata	Wet
30.8	35.8	25.9	30.9	9.9	-5	4.9	-0.1		OSullivan Beach	Quartzite	December 18	Yes	2:54pm	25	0	Lower	Diloma concamerata	Wet
25.6	33.4	18.5	26	14.9	-7.8	7.1	-0.4		OSullivan Beach	Quartzite	December 18	No	2:56pm	25	0	Lower	Diloma concamerata	Dry
28.3	34	24.5	28.2	9.5	-5.7	3.8	0.1		OSullivan Beach	Quartzite	December 18	No	2:58pm	25	0	Lower	Diloma concamerata	Wet
27.1	30.6	23.9	27.1	6.7	-3.5	3.2	0		OSullivan Beach	Quartzite	December 18	No	3:03pm	25	0	Lower	Diloma concamerata	Wet
33.5	38.7	25.5	31.6	13.2	-5.2	8	1.9		OSullivan Beach	Quartzite	December 18	No	3:15pm	25	0	Lower	Diloma concamerata	Dry
25.9	31.9	20.1	26.9	11.8	-6	5.8	-1		OSullivan Beach	Quartzite	December 18	No	3:19pm	25	0	Lower	Diloma concamerata	Wet
27.8	31.1	22.4	27.7	8.7	-3.3	5.4	0.1		OSullivan Beach	Quartzite	December 18	No	3:21pm	25	0	Lower	Diloma concamerata	Dry
28.6	33.3	24.1	29.2	9.2	-4.7	4.5	-0.6		OSullivan Beach	Quartzite	December 18	No	3:24pm	25	0	Lower	Diloma concamerata	Wet
27.5	32.5	21.1	27.1	11.4	-5	6.4	0.4		OSullivan Beach	Quartzite	December 18	No	3:25pm	25	0	Lower	Diloma concamerata	Wet
25.2	31.6	22.1	27.6	9.5	-6.4	3.1	-2.4		OSullivan Beach	Quartzite	December 18	No	3:27pm	25	0	Lower	Diloma concamerata	Dry
27.4	31.3	21.9	26.6	9.4	-3.9	5.5	0.8		OSullivan Beach	Quartzite	December 18	No	3:28pm	25	0	Lower	Diloma concamerata	Dry
31.7	33.9	26.7	29.9	7.2	-2.2	5	1.8		OSullivan Beach	Quartzite	December 18	No	3:29pm	25	0	Lower	Diloma concamerata	Wet
32	35.9	25.8	30.4	10.1	-3.9	6.2	1.6		OSullivan Beach	Quartzite	December 18	Yes	3:32pm	25	0	Lower	Diloma concamerata	Dry
26.1	32.1	23.2	27.3	8.9	-6	2.9	-1.2		OSullivan Beach	Quartzite	December 18	Yes	3:34pm	25	0	Lower	Diloma concamerata	Dry
30.8	34.2	22.1	29.8	12.1	-3.4	8.7	1		OSullivan Beach	Quartzite	December 18	Yes	3:35pm	25	0	Lower	Diloma concamerata	Dry
26	30.8	23.3	27.4	7.5	-4.8	2.7	-1.4		OSullivan Beach	Quartzite	December 18	Yes	3:37pm	25	0	Lower	Diloma concamerata	Wet
28.3	30.4	22.2	27.1	8.2	-2.1	6.1	1.2		OSullivan Beach	Quartzite	December 18	Yes	3:40pm	25	0	Lower	Diloma concamerata	Dry
27.3	31.6	24	28.1	7.6	-4.3	3.3	-0.8		OSullivan Beach	Quartzite	December 18	Yes	3:41pm	25	0	Lower	Diloma concamerata	Dry
27.5	31.7	25	29	6.7	-4.2	2.5	-1.5		OSullivan Beach	Quartzite	December 18	Yes	3:42pm	25	0	Lower	Diloma concamerata	Dry
26.6	32.2	23.3	27.3	8.9	-5.6	3.3	-0.7		OSullivan Beach	Quartzite	December 18	Yes	3:44pm	25	0	Lower	Diloma concamerata	Dry
33.9	37.8	27.1	32.9	10.7	-3.9	6.8	1		OSullivan Beach	Quartzite	December 18	Yes	2:04pm	25	0	Lower	Bembicium nanum	Dry
37	38.8	27.6	33.8	11.2	-1.8	9.4	3.2		OSullivan Beach	Quartzite	December 18	Yes	2:06pm	25	0	Lower	Bembicium nanum	Dry
32.1	36.3	28.7	31.9	7.6	-4.2	3.4	0.2		OSullivan Beach	Quartzite	December 18	Yes	2:07pm	25	0	Lower	Bembicium nanum	Dry
36.7	40.6	32.3	36.2	8.3	-3.9	4.4	0.5		OSullivan Beach	Quartzite	December 18	Yes	2:09pm	25	0	Lower	Bembicium nanum	Dry
31.8	39.2	29.4	33.6	9.8	-7.4	2.4	-1.8		OSullivan Beach	Quartzite	December 18	Yes	2:11pm	25	0	Lower	Bembicium nanum	Dry
31.7	35.4	27	30.3	8.4	-3.7	4.7	1.4		OSullivan Beach	Quartzite	December 18	Yes	2:15pm	25	0	Lower	Bembicium nanum	Dry
32.3	40.3	24.5	29.7	15.8	-8	7.8	2.6		OSullivan Beach	Quartzite	December 18	Yes	2:16pm	25	0	Lower	Bembicium nanum	Dry
33.7	37.6	29.5	33.1	8.1	-3.9	4.2	0.6		OSullivan Beach	Quartzite	December 18	Yes	2:21pm	25	0	Lower	Bembicium nanum	Dry
30.4	35.1	27.8	31.6	7.3	-4.7	2.6	-1.2		OSullivan Beach	Quartzite	December 18	Yes	2:23pm	25	0	Lower	Bembicium nanum	Wet
33.2	37.8	28.9	32.1	8.9	-4.6	4.3	1.1		OSullivan Beach	Quartzite	December 18	Yes	2:26pm	25	0	Lower	Bembicium nanum	Dry
29.2	37.1	25.8	29.7	11.3	-7.9	3.4	-0.5		OSullivan Beach	Quartzite	December 18	Yes	2:30pm	25	0	Lower	Bembicium nanum	Dry
33.6	37.2	25.2	29.8	12	-3.6	8.4	3.8		OSullivan Beach	Quartzite	December 18	No	2:42pm	25	0	Lower	Bembicium nanum	Dry
32.6	35.5	24.6	29.7	10.9	-2.9	8	2.9		OSullivan Beach	Quartzite	December 18	Yes	3:00pm	25	0	Lower	Bembicium nanum	Dry
31.3	38.2	27.4	32.4	10.8	-6.9	3.9	-1.1		OSullivan Beach	Quartzite	December 18	Yes	3:05pm	25	0	Lower	Bembicium nanum	Dry
33.6	39.1	26.7	32.5	12.4	-5.5	6.9	1.1		OSullivan Beach	Quartzite	December 18	No	3:14pm	25	0	Lower	Bembicium nanum	Dry
29.5	38.7	25.5	31.6	13.2	-9.2	4	-2.1		OSullivan Beach	Quartzite	December 18	No	3:15pm	25	0	Lower	Bembicium nanum	Dry
28.2	30.8	23.3	27.4	7.5	-2.6	4.9	0.8		OSullivan Beach	Quartzite	December 18	No	3:37pm	25	0	Lower	Bembicium nanum	Wet
35.2	37.1	27.4	32.6	9.7	-1.9	7.8	2.6		OSullivan Beach	Quartzite	December 18	Yes	3:57pm	24	0	Upper	Bembicium nanum	Dry
31.8	35.8	26.6	32.2	9.2	-4	5.2	-0.4		OSullivan Beach	Quartzite	December 18	Yes	3:59pm	24	0	Upper	Bembicium nanum	Dry
27.9	33.2	23	26.8	10.2	-5.3	4.9	1.1		OSullivan Beach	Quartzite	December 18	Yes	4:00pm	24	0	Upper	Bembicium nanum	Dry
34.9	36.5	28.5	32.8	8	-1.6	6.4	2.1		OSullivan Beach	Quartzite	December 18	Yes	4:02pm	24	0	Upper	Bembicium nanum	Dry
31.7	38.2	27.2	31.7	11	-6.5	4.5	0		OSullivan Beach	Quartzite	December 18	Yes	4:04pm	24	0	Upper	Bembicium nanum	Dry
28	32	24.4	27.3	7.6	-4	3.6	0.7		OSullivan Beach	Quartzite	December 18	Yes	4:06pm	24	0	Upper	Bembicium nanum	Dry
28.5	35	25.8	29.7	9.2	-6.5	2.7	-1.2		OSullivan Beach	Quartzite	December 18	Yes	4:07pm	24	0	Upper	Bembicium nanum	Dry
28.7	37.3	25.9	30.9	11.4	-8.6	2.8	-2.2		OSullivan Beach	Quartzite	December 18	Yes	4:10pm	24	0	Upper	Bembicium nanum	Dry
29.5	33.1	24	29.5	9.1	-3.6	5.5	0		OSullivan Beach	Quartzite	December 18	Yes	4:11pm	24	0	Upper	Bembicium nanum	Wet
35.9	37.8	30.4	33.3	7.4	-1.9	5.5	2.6		OSullivan Beach	Quartzite	December 18	Yes	4:13pm	24	0	Upper	Bembicium nanum	Dry
30.3	33.4	22.7	28.4	10.7	-3.1	7.6	1.9		OSullivan Beach	Quartzite	December 18	Yes	4:15pm	24	0	Upper	Bembicium nanum	Dry
29.4	34.8	27.9	31.3	6.9	-5.4	1.5	-1.9		OSullivan Beach	Quartzite	December 18	Yes	4:18pm	24	0	Upper	Bembicium nanum	Dry
30.7	33.1	26	29.5	7.1	-2.4	4.7	1.2		OSullivan Beach	Quartzite	December 18	Yes	4:19pm	24	0	Upper	Bembicium nanum	Dry
24.9	34.9	21.9	27.6	13	-10	3	-2.7		Marino Rocks	Grey siltstone	December 20	Yes	2:10pm	23	0	Lower	Nerita atramentosa	Wet
21.3	30.2	20.1	24.5	10.1	-8.9	1.2	-3.2		Marino Rocks	Grey siltstone	December 20	Yes	2:13pm	23	0	Lower	Nerita atramentosa	Wet
27.2	33.2	26.4	29.1	6.8	-6	0.8	-1.9		Marino Rocks	Grey siltstone	December 20	Yes	2:15pm	23	0	Lower	Nerita atramentosa	Dry
25.6	31	21.8	26.8	9.2	-5.4	3.8	-1.2		Marino Rocks	Grey siltstone	December 20	Yes	2:16pm	23	0	Lower	Nerita atramentosa	Dry
29.8	33.8	27.7	30.2	6.1	-4	2.1	-0.4		Marino Rocks	Grey siltstone	December 20	Yes	2:17pm	23	0	Lower	Nerita atramentosa	Wet
25.3	31.6	23.5	27.3	8.1	-6.3	1.8	-2		Marino Rocks	Grey siltstone	December 20	Yes	2:19pm	23	0	Lower	Nerita atramentosa	Wet
25.3	30.2	24.8	27	5.4	-4.9	0.5	-1.7		Marino Rocks	Grey siltstone	December 20	Yes	2:23pm	23	0	Lower	Nerita atramentosa	Dry
27.8	30.9	25	27.5	5.9	-3.1	2.8	0.3		Marino Rocks	Grey siltstone	December 20	Yes	2:24pm	23	0	Lower	Nerita atramentosa	Wet
29.4	33.8	26.1	29.2	7.7	-4.4	3.3	0.2		Marino Rocks	Grey siltstone	December 20	Yes	2:25pm	23	0	Lower	Nerita atramentosa	Dry
25.8	30.1	24.8	26.8	5.3	-4.3	1	-1		Marino Rocks	Grey siltstone	December 20	Yes	2:27pm	23	0	Lower	Nerita atramentosa	Wet
29.8	34.4	25.2	28.8	9.2	-4.6	4.6	1		Marino Rocks	Grey siltstone	December 20	Yes	2:27pm	23	0	Lower	Nerita atramentosa	Dry
31.2	38.8	27.3	31.3	11.5	-7.6	3.9	-0.1		Marino Rocks	Grey siltstone	December 20	Yes	2:28pm	23	0	Lower	Nerita atramentosa	Wet
33.3	35.7	29.2	32.6	6.5	-2.4	4.1	0.7		Marino Rocks	Grey siltstone	December 20	Yes	2:30pm	23	0	Lower	Nerita atramentosa	Wet
29.4	31.9	26.6	29.7	5.3	-2.5	2.8	-0.3		Marino Rocks	Grey siltstone	December 20	Yes	2:31pm	23	0	Lower	Nerita atramentosa	Wet
29.6	33.7	28	30.6	5.7	-4.1	1.6	-1		Marino Rocks	Grey siltstone	December 20	Yes	2:32pm	23	0	Lower	Nerita atramentosa	Dry
28.8	32.6	26.8	29.6	5.8	-3.8	2	-0.8		Marino Rocks	Grey siltstone	December 20	Yes	2:33pm	23	0	Lower	Nerita atramentosa	Dry
27.4	32.7	26.1	28.8	6.6	-5.3	1.3	-1.4		Marino Rocks	Grey siltstone	December 20	Yes	2:36pm	23	0	Lower	Nerita atramentosa	Wet
27.9	30.8	25.5	27.8	5.3	-2.9	2.4	0.1		Marino Rocks	Grey siltstone	December 20	Yes	2:39pm	23	0	Lower	Nerita atramentosa	Wet
28.7	36.1	28	30.9	8.1	-7.4	0.7	-2.2		Marino Rocks	Grey siltstone	December 20	Yes	2:40pm	23	0	Lower	Nerita atramentosa	Wet
29.2	39.6	25.9	31.7	13.7	-10.4	3.3	-2.5		Marino Rocks	Grey siltstone	December 20	Yes	2:41pm	23	0	Lower	Nerita atramentosa	Wet
29	33.3	25.1	29.2	8.2	-4.3	3.9	-0.2		Marino Rocks	Grey siltstone	December 20	Yes	2:42pm	23	0	Lower	Nerita atramentosa	Wet
27.7	33.8	23.3	28.4	10.5	-6.1	4.4	-0.7		Marino Rocks	Grey siltstone	December 20	Yes	2:43pm	23	0	Lower	Nerita atramentosa	Dry
31.1	35.9	29	31.8	6.9	-4.8	2.1	-0.7		Marino Rocks	Grey siltstone	December 20	Yes	2:44pm	23	0	Lower	Nerita atramentosa	Dry
27.5	33.3	26.7	28.7	6.6	-5.8	0.8	-1.2		Marino Rocks	Grey siltstone	December 20	Yes	2:45pm	23	0	Lower	Nerita atramentosa	Dry
28.1	33.9	25.9	28.9	8	-5.8	2.2	-0.8		Marino Rocks	Grey siltstone	December 20	Yes	2:46pm	23	0	Lower	Nerita atramentosa	Wet
26.8	31.4	22.8	27	8.6	-4.6	4	-0.2		Marino Rocks	Grey siltstone	December 20	Yes	2:47pm	23	0	Lower	Nerita atramentosa	Dry
27.5	36.8	26.8	30.7	10	-9.3	0.7	-3.2		Marino Rocks	Grey siltstone	December 20	Yes	2:48pm	23	0	Lower	Nerita atramentosa	Dry
27	32.2	25	28.6	7.2	-5.2	2	-1.6		Marino Rocks	Grey siltstone	December 20	Yes	2:49pm	23	0	Lower	Nerita atramentosa	Wet
27.7	34.4	26.6	29.2	7.8	-6.7	1.1	-1.5		Marino Rocks	Grey siltstone	December 20	Yes	2:50pm	23	0	Lower	Nerita atramentosa	Dry
28.8	35.3	26.6	30.5	8.7	-6.5	2.2	-1.7		Marino Rocks	Grey siltstone	December 20	Yes	2:56pm	23	0	Lower	Nerita atramentosa	Dry
23.3	34.9	21.9	27.6	13	-11.6	1.4	-4.3		Marino Rocks	Grey siltstone	December 20	No	2:10pm	23	0	Lower	Diloma concamerata	Wet
25.2	32.4	23.5	27.3	8.9	-7.2	1.7	-2.1		Marino Rocks	Grey siltstone	December 20	No	2:19pm	23	0	Lower	Diloma concamerata	Wet
30.2	38.8	27.3	31.3	11.5	-8.6	2.9	-1.1		Marino Rocks	Grey siltstone	December 20	No	2:28pm	23	0	Lower	Diloma concamerata	Wet
27.9	31.9	26.7	29.7	5.2	-4	1.2	-1.8		Marino Rocks	Grey siltstone	December 20	No	2:31pm	23	0	Lower	Diloma concamerata	Wet
28.3	31.2	23.9	27.7	7.3	-2.9	4.4	0.6		Marino Rocks	Grey siltstone	December 20	Yes	2:35pm	23	0	Lower	Diloma concamerata	Wet
28	39.6	25.9	31.7	13.7	-11.6	2.1	-3.7		Marino Rocks	Grey siltstone	December 20	No	2:41pm	23	0	Lower	Diloma concamerata	Wet
29.5	33.3	25.1	29.2	8.2	-3.8	4.4	0.3		Marino Rocks	Grey siltstone	December 20	No	2:42pm	23	0	Lower	Diloma concamerata	Wet
27.7	32.2	24.8	28.6	7.4	-4.5	2.9	-0.9		Marino Rocks	Grey siltstone	December 20	No	2:49pm	23	0	Lower	Diloma concamerata	Wet
26.8	31.8	25.2	28.6	6.6	-5	1.6	-1.8		Marino Rocks	Grey siltstone	December 20	Yes	2:53pm	23	0	Lower	Diloma concamerata	Dry
26.7	33.4	25.5	28.3	7.9	-6.7	1.2	-1.6		Marino Rocks	Grey siltstone	December 20	Yes	2:54pm	23	0	Lower	Diloma concamerata	Wet
27.3	37.6	25.4	31	12.2	-10.3	1.9	-3.7		Marino Rocks	Grey siltstone	December 20	Yes	3:09pm	23	0	Lower	Diloma concamerata	Wet
25.8	33.9	24.3	29.4	9.6	-8.1	1.5	-3.6		Marino Rocks	Grey siltstone	December 20	Yes	3:10pm	23	0	Lower	Diloma concamerata	Wet
26.2	30.6	23.4	26.2	7.2	-4.4	2.8	0		Marino Rocks	Grey siltstone	December 20	Yes	3:11pm	23	0	Lower	Diloma concamerata	Wet
31	32.4	27	30	5.4	-1.4	4	1		Marino Rocks	Grey siltstone	December 20	Yes	3:13pm	23	0	Lower	Diloma concamerata	Wet
31.2	38.3	28.9	33.9	9.4	-7.1	2.3	-2.7		Marino Rocks	Grey siltstone	December 20	Yes	3:20pm	23	0	Lower	Diloma concamerata	Wet
30.4	33.5	25.9	29.6	7.6	-3.1	4.5	0.8		Marino Rocks	Grey siltstone	December 20	Yes	3:21pm	23	0	Lower	Diloma concamerata	Dry
32.4	35.4	27.3	30.2	8.1	-3	5.1	2.2		Marino Rocks	Grey siltstone	December 20	Yes	3:24pm	23	0	Lower	Diloma concamerata	Dry
30.4	33.6	25.3	29.7	8.3	-3.2	5.1	0.7		Marino Rocks	Grey siltstone	December 20	Yes	3:31pm	23	0	Lower	Diloma concamerata	Dry
29.8	34.5	25.1	29.2	9.4	-4.7	4.7	0.6		Marino Rocks	Grey siltstone	December 20	Yes	3:33pm	23	0	Lower	Diloma concamerata	Wet
30.3	33.5	25.6	28.6	7.9	-3.2	4.7	1.7		Marino Rocks	Grey siltstone	December 20	Yes	3:34pm	23	0	Lower	Diloma concamerata	Wet
28.4	32.3	25.9	28.5	6.4	-3.9	2.5	-0.1		Marino Rocks	Grey siltstone	December 20	Yes	3:36pm	23	0	Lower	Diloma concamerata	Wet
29.3	34.9	26.3	29.2	8.6	-5.6	3	0.1		Marino Rocks	Grey siltstone	December 20	Yes	3:38pm	23	0	Lower	Diloma concamerata	Dry
27.8	32.9	25.7	28.4	7.2	-5.1	2.1	-0.6		Marino Rocks	Grey siltstone	December 20	Yes	3:41pm	23	0	Lower	Diloma concamerata	Wet
31	34.9	28.1	31.6	6.8	-3.9	2.9	-0.6		Marino Rocks	Grey siltstone	December 20	Yes	3:42pm	23	0	Lower	Diloma concamerata	Dry
28.8	34.3	26.5	29.4	7.8	-5.5	2.3	-0.6		Marino Rocks	Grey siltstone	December 20	Yes	3:43pm	23	0	Lower	Diloma concamerata	Wet
32.4	36.7	30.3	32.8	6.4	-4.3	2.1	-0.4		Marino Rocks	Grey siltstone	December 20	Yes	3:45pm	23	0	Lower	Diloma concamerata	Dry
33.3	36.2	31	33	5.2	-2.9	2.3	0.3		Marino Rocks	Grey siltstone	December 20	Yes	3:46pm	23	0	Lower	Diloma concamerata	Dry
26.4	34.1	24.9	27.9	9.2	-7.7	1.5	-1.5		Marino Rocks	Grey siltstone	December 20	Yes	3:48pm	23	0	Lower	Diloma concamerata	Wet
27.1	36.5	24.7	29.8	11.8	-9.4	2.4	-2.7		Marino Rocks	Grey siltstone	December 20	Yes	3:48pm	23	0	Lower	Diloma concamerata	Wet
24.7	30.2	23	26	7.2	-5.5	1.7	-1.3		Marino Rocks	Grey siltstone	December 20	Yes	3:50pm	23	0	Lower	Diloma concamerata	Dry
28.9	32.4	23.5	27.3	8.9	-3.5	5.4	1.6		Marino Rocks	Grey siltstone	December 20	No	2:19pm	23	0	Lower	Bembicium nanum	Wet
33.1	35.3	29.9	32.1	5.4	-2.2	3.2	1		Marino Rocks	Grey siltstone	December 20	Yes	2:37pm	23	0	Lower	Bembicium nanum	Dry
31.7	34.2	28.8	31	5.4	-2.5	2.9	0.7		Marino Rocks	Grey siltstone	December 20	Yes	2:52pm	23	0	Lower	Bembicium nanum	Dry
31.4	37.8	30.5	33.4	7.3	-6.4	0.9	-2		Marino Rocks	Grey siltstone	December 20	Yes	2:57pm	23	0	Lower	Bembicium nanum	Dry
37.5	40.5	31.8	34.6	8.7	-3	5.7	2.9		Marino Rocks	Grey siltstone	December 20	Yes	2:58pm	23	0	Lower	Bembicium nanum	Dry
33.5	39.5	28.5	33.3	11	-6	5	0.2		Marino Rocks	Grey siltstone	December 20	Yes	3:15pm	23	0	Lower	Bembicium nanum	Dry
34.1	36.3	26.6	30.3	9.7	-2.2	7.5	3.8		Marino Rocks	Grey siltstone	December 20	Yes	3:16pm	23	0	Lower	Bembicium nanum	Wet
37.7	39.5	28.3	32.3	11.2	-1.8	9.4	5.4		Marino Rocks	Grey siltstone	December 20	Yes	3:18pm	23	0	Lower	Bembicium nanum	Dry
33.3	40.2	30.5	33.4	9.7	-6.9	2.8	-0.1		Marino Rocks	Grey siltstone	December 20	Yes	3:26pm	23	0	Lower	Bembicium nanum	Dry
30.4	32.3	25.9	28.5	6.4	-1.9	4.5	1.9		Marino Rocks	Grey siltstone	December 20	No	3:36pm	23	0	Lower	Bembicium nanum	Wet
27.9	34.9	26.4	29.2	8.5	-7	1.5	-1.3		Marino Rocks	Grey siltstone	December 20	No	3:38pm	23	0	Lower	Bembicium nanum	Dry
32.7	37.8	31	34.1	6.8	-5.1	1.7	-1.4		Marino Rocks	Grey siltstone	December 20	Yes	4:05pm	23	0	Upper	Bembicium nanum	Dry
33.9	39.5	31.8	34.3	7.7	-5.6	2.1	-0.4		Marino Rocks	Grey siltstone	December 20	Yes	4:07pm	23	0	Upper	Bembicium nanum	Dry
31.6	35.8	29.8	31.7	6	-4.2	1.8	-0.1		Marino Rocks	Grey siltstone	December 20	Yes	4:09pm	23	0	Upper	Bembicium nanum	Dry
34.1	38	30.2	33.3	7.8	-3.9	3.9	0.8		Marino Rocks	Grey siltstone	December 20	Yes	4:11pm	23	0	Upper	Bembicium nanum	Dry
29.8	33.7	26.7	30.3	7	-3.9	3.1	-0.5		Marino Rocks	Grey siltstone	December 20	Yes	4:13pm	23	0	Upper	Bembicium nanum	Dry
31	35.9	28.4	32.2	7.5	-4.9	2.6	-1.2		Marino Rocks	Grey siltstone	December 20	Yes	4:17pm	23	0	Upper	Bembicium nanum	Dry
34.1	36.9	31.8	34.1	5.1	-2.8	2.3	0		Marino Rocks	Grey siltstone	December 20	Yes	4:20pm	23	0	Upper	Bembicium nanum	Dry
35.7	38.5	31.6	34.9	6.9	-2.8	4.1	0.8		Marino Rocks	Grey siltstone	December 20	Yes	4:21pm	23	0	Upper	Bembicium nanum	Dry
30.8	34.4	30	31.9	4.4	-3.6	0.8	-1.1		Marino Rocks	Grey siltstone	December 20	Yes	4:22pm	23	0	Upper	Bembicium nanum	Dry
34.9	38.4	28.3	34.3	10.1	-3.5	6.6	0.6		Marino Rocks	Grey siltstone	December 20	Yes	4:24pm	23	0	Upper	Bembicium nanum	Dry
33.5	35.9	31.6	33.6	4.3	-2.4	1.9	-0.1		Marino Rocks	Grey siltstone	December 20	Yes	4:25pm	23	0	Upper	Bembicium nanum	Dry
31.8	36.8	29.2	32.6	7.6	-5	2.6	-0.8		Marino Rocks	Grey siltstone	December 20	Yes	4:26pm	23	0	Upper	Bembicium nanum	Dry
34	39.5	33.4	35.9	6.1	-5.5	0.6	-1.9		Marino Rocks	Grey siltstone	December 20	Yes	4:27pm	23	0	Upper	Bembicium nanum	Dry
34.7	36.7	32.3	34	4.4	-2	2.4	0.7		Marino Rocks	Grey siltstone	December 20	Yes	4:28pm	23	0	Upper	Bembicium nanum	Dry
33.9	37.9	31.6	34.4	6.3	-4	2.3	-0.5		Marino Rocks	Grey siltstone	December 20	Yes	4:29pm	23	0	Upper	Bembicium nanum	Dry
31	35.2	28.7	32.3	6.5	-4.2	2.3	-1.3		Marino Rocks	Grey siltstone	December 20	Yes	4:31pm	23	0	Upper	Bembicium nanum	Dry
30.1	35.5	29.2	31.9	6.3	-5.4	0.9	-1.8		Marino Rocks	Grey siltstone	December 20	Yes	4:32pm	23	0	Upper	Bembicium nanum	Dry
30.9	38	29.8	32.8	8.2	-7.1	1.1	-1.9		Marino Rocks	Grey siltstone	December 20	Yes	4:33pm	23	0	Upper	Bembicium nanum	Dry
35	38.3	30.8	33.8	7.5	-3.3	4.2	1.2		Marino Rocks	Grey siltstone	December 20	Yes	4:34pm	23	0	Upper	Bembicium nanum	Dry
26.6	30.7	24.4	26.8	6.3	-4.1	2.2	-0.2		OSullivan Beach	Quartzite	December 21	Yes	3:03pm	25	0	Lower	Nerita atramentosa	Dry
23.3	27.7	19.2	23.2	8.5	-4.4	4.1	0.1		OSullivan Beach	Quartzite	December 21	Yes	3:05pm	25	0	Lower	Nerita atramentosa	Wet
22.1	28.8	19.2	24	9.6	-6.7	2.9	-1.9		OSullivan Beach	Quartzite	December 21	Yes	3:08pm	25	0	Lower	Nerita atramentosa	Dry
23.3	29.2	21.1	24.4	8.1	-5.9	2.2	-1.1		OSullivan Beach	Quartzite	December 21	Yes	3:09pm	25	0	Lower	Nerita atramentosa	Wet
24.4	27.9	18.9	23.2	9	-3.5	5.5	1.2		OSullivan Beach	Quartzite	December 21	Yes	3:10pm	25	0	Lower	Nerita atramentosa	Wet
26.4	30.1	21.9	26.2	8.2	-3.7	4.5	0.2		OSullivan Beach	Quartzite	December 21	Yes	3:12pm	25	0	Lower	Nerita atramentosa	Dry
22.3	27.8	19.6	24	8.2	-5.5	2.7	-1.7		OSullivan Beach	Quartzite	December 21	Yes	3:15pm	25	0	Lower	Nerita atramentosa	Dry
21.9	27.6	20.7	24.5	6.9	-5.7	1.2	-2.6		OSullivan Beach	Quartzite	December 21	Yes	3:16pm	25	0	Lower	Nerita atramentosa	Wet
29.7	34.1	24.3	28	9.8	-4.4	5.4	1.7		OSullivan Beach	Quartzite	December 21	Yes	3:18pm	25	0	Lower	Nerita atramentosa	Wet
25.6	31.2	22.6	26.7	8.6	-5.6	3	-1.1		OSullivan Beach	Quartzite	December 21	Yes	3:21pm	25	0	Lower	Nerita atramentosa	Dry
26.7	31	22.6	26.7	8.4	-4.3	4.1	0		OSullivan Beach	Quartzite	December 21	Yes	3:23pm	25	0	Lower	Nerita atramentosa	Wet
30.2	33.2	24	27.9	9.2	-3	6.2	2.3		OSullivan Beach	Quartzite	December 21	Yes	3:25pm	25	0	Lower	Nerita atramentosa	Dry
27.8	31.2	24.3	27.2	6.9	-3.4	3.5	0.6		OSullivan Beach	Quartzite	December 21	Yes	3:27pm	25	0	Lower	Nerita atramentosa	Wet
26.8	30.8	23.7	26.8	7.1	-4	3.1	0		OSullivan Beach	Quartzite	December 21	Yes	3:28pm	25	0	Lower	Nerita atramentosa	Dry
25.9	33.2	24.6	28.2	8.6	-7.3	1.3	-2.3		OSullivan Beach	Quartzite	December 21	Yes	3:29pm	25	0	Lower	Nerita atramentosa	Wet
27.1	30.9	20.3	26.2	10.6	-3.8	6.8	0.9		OSullivan Beach	Quartzite	December 21	Yes	3:32pm	25	0	Lower	Nerita atramentosa	Dry
26.2	29.8	21.5	25.7	8.3	-3.6	4.7	0.5		OSullivan Beach	Quartzite	December 21	Yes	3:33pm	25	0	Lower	Nerita atramentosa	Dry
27	30.4	22.6	26.4	7.8	-3.4	4.4	0.6		OSullivan Beach	Quartzite	December 21	Yes	3:35pm	25	0	Lower	Nerita atramentosa	Dry
30.9	33	27.5	30.1	5.5	-2.1	3.4	0.8		OSullivan Beach	Quartzite	December 21	Yes	3:36pm	25	0	Lower	Nerita atramentosa	Dry
29.1	31.9	26	28.6	5.9	-2.8	3.1	0.5		OSullivan Beach	Quartzite	December 21	Yes	3:38pm	25	0	Lower	Nerita atramentosa	Dry
28	35.7	23.4	29.2	12.3	-7.7	4.6	-1.2		OSullivan Beach	Quartzite	December 21	Yes	3:39pm	25	0	Lower	Nerita atramentosa	Dry
28.5	32.5	24.1	29.5	8.4	-4	4.4	-1		OSullivan Beach	Quartzite	December 21	Yes	3:41pm	25	0	Lower	Nerita atramentosa	Dry
28.8	32.8	25.6	29	7.2	-4	3.2	-0.2		OSullivan Beach	Quartzite	December 21	Yes	3:43pm	25	0	Lower	Nerita atramentosa	Wet
25.6	33.9	21.5	28.3	12.4	-8.3	4.1	-2.7		OSullivan Beach	Quartzite	December 21	Yes	3:44pm	25	0	Lower	Nerita atramentosa	Dry
23.3	30.2	22.2	26.3	8	-6.9	1.1	-3		OSullivan Beach	Quartzite	December 21	Yes	3:46pm	25	0	Lower	Nerita atramentosa	Dry
28.3	36.3	26.8	30.8	9.5	-8	1.5	-2.5		OSullivan Beach	Quartzite	December 21	Yes	3:47pm	25	0	Lower	Nerita atramentosa	Dry
27.6	32.5	25.8	28.2	6.7	-4.9	1.8	-0.6		OSullivan Beach	Quartzite	December 21	Yes	3:48pm	25	0	Lower	Nerita atramentosa	Dry
26.1	32.5	22.7	27.3	9.8	-6.4	3.4	-1.2		OSullivan Beach	Quartzite	December 21	Yes	3:49pm	25	0	Lower	Nerita atramentosa	Dry
29.4	35.4	24.5	29.8	10.9	-6	4.9	-0.4		OSullivan Beach	Quartzite	December 21	Yes	3:50pm	25	0	Lower	Nerita atramentosa	Dry
29.4	34.8	24	29.3	10.8	-5.4	5.4	0.1		OSullivan Beach	Quartzite	December 21	Yes	3:51pm	25	0	Lower	Nerita atramentosa	Wet
26.5	30.7	24.4	26.8	6.3	-4.2	2.1	-0.3		OSullivan Beach	Quartzite	December 21	No	3:03pm	25	0	Lower	Diloma concamerata	Dry
22.9	27.7	19.2	23.2	8.5	-4.8	3.7	-0.3		OSullivan Beach	Quartzite	December 21	No	3:05pm	25	0	Lower	Diloma concamerata	Wet
21.8	29	20.3	24.5	8.7	-7.2	1.5	-2.7		OSullivan Beach	Quartzite	December 21	No	3:06pm	25	0	Lower	Diloma concamerata	Dry
25	28.8	19.2	24	9.6	-3.8	5.8	1		OSullivan Beach	Quartzite	December 21	No	3:08pm	25	0	Lower	Diloma concamerata	Dry
24.4	29.2	21.1	24.4	8.1	-4.8	3.3	0		OSullivan Beach	Quartzite	December 21	No	3:09pm	25	0	Lower	Diloma concamerata	Wet
24.2	27.9	18.9	23.2	9	-3.7	5.3	1		OSullivan Beach	Quartzite	December 21	No	3:10pm	25	0	Lower	Diloma concamerata	Wet
25.5	30.7	21.9	26.2	8.8	-5.2	3.6	-0.7		OSullivan Beach	Quartzite	December 21	No	3:12pm	25	0	Lower	Diloma concamerata	Wet
21.6	27.5	19.6	24	7.9	-5.9	2	-2.4		OSullivan Beach	Quartzite	December 21	No	3:15pm	25	0	Lower	Diloma concamerata	Wet
24.7	29.5	20.7	24.5	8.8	-4.8	4	0.2		OSullivan Beach	Quartzite	December 21	No	3:16pm	25	0	Lower	Diloma concamerata	Wet
26.1	34.1	24.3	28	9.8	-8	1.8	-1.9		OSullivan Beach	Quartzite	December 21	No	3:18pm	25	0	Lower	Diloma concamerata	Wet
24.2	31	21.4	26.2	9.6	-6.8	2.8	-2		OSullivan Beach	Quartzite	December 21	Yes	3:22pm	25	0	Lower	Diloma concamerata	Dry
26.9	31.2	24.3	27.2	6.9	-4.3	2.6	-0.3		OSullivan Beach	Quartzite	December 21	No	3:27pm	25	0	Lower	Diloma concamerata	Wet
27.8	30.8	23.7	26.8	7.1	-3	4.1	1		OSullivan Beach	Quartzite	December 21	No	3:28pm	25	0	Lower	Diloma concamerata	Dry
29.1	33.2	24.6	28.2	8.6	-4.1	4.5	0.9		OSullivan Beach	Quartzite	December 21	No	3:29pm	25	0	Lower	Diloma concamerata	Wet
26.6	31.4	23.5	26.8	7.9	-4.8	3.1	-0.2		OSullivan Beach	Quartzite	December 21	Yes	3:31pm	25	0	Lower	Diloma concamerata	Dry
26.5	30.9	20.3	26.2	10.6	-4.4	6.2	0.3		OSullivan Beach	Quartzite	December 21	No	3:32pm	25	0	Lower	Diloma concamerata	Dry
25.9	30.4	22.6	26.4	7.8	-4.5	3.3	-0.5		OSullivan Beach	Quartzite	December 21	No	3:35pm	25	0	Lower	Diloma concamerata	Wet
30.7	32.7	27.5	30.1	5.2	-2	3.2	0.6		OSullivan Beach	Quartzite	December 21	No	3:36pm	25	0	Lower	Diloma concamerata	Dry
27.3	29.7	23.8	27.4	5.9	-2.4	3.5	-0.1		OSullivan Beach	Quartzite	December 21	Yes	3:37pm	25	0	Lower	Diloma concamerata	Dry
30.1	37.3	27.5	32	9.8	-7.2	2.6	-1.9		OSullivan Beach	Quartzite	December 21	Yes	3:40pm	25	0	Lower	Diloma concamerata	Dry
29	35.2	24.1	29.5	11.1	-6.2	4.9	-0.5		OSullivan Beach	Quartzite	December 21	No	3:41pm	25	0	Lower	Diloma concamerata	Dry
27.3	34.1	25.6	29	8.5	-6.8	1.7	-1.7		OSullivan Beach	Quartzite	December 21	No	3:43pm	25	0	Lower	Diloma concamerata	Wet
29.5	33.9	21.5	28.3	12.4	-4.4	8	1.2		OSullivan Beach	Quartzite	December 21	No	3:44pm	25	0	Lower	Diloma concamerata	Dry
25	30	22.2	26.3	7.8	-5	2.8	-1.3		OSullivan Beach	Quartzite	December 21	No	3:46pm	25	0	Lower	Diloma concamerata	Dry
29.9	36.3	26.8	30.8	9.5	-6.4	3.1	-0.9		OSullivan Beach	Quartzite	December 21	No	3:47pm	25	0	Lower	Diloma concamerata	Dry
27	32.5	25.8	28.2	6.7	-5.5	1.2	-1.2		OSullivan Beach	Quartzite	December 21	No	3:48pm	25	0	Lower	Diloma concamerata	Dry
24.2	32.5	22.7	27.3	9.8	-8.3	1.5	-3.1		OSullivan Beach	Quartzite	December 21	No	3:49pm	25	0	Lower	Diloma concamerata	Dry
32.8	35.4	24.5	29.8	10.9	-2.6	8.3	3		OSullivan Beach	Quartzite	December 21	No	3:50pm	25	0	Lower	Diloma concamerata	Dry
29.8	34.8	24	29.3	10.8	-5	5.8	0.5		OSullivan Beach	Quartzite	December 21	No	3:51pm	25	0	Lower	Diloma concamerata	Dry
28.4	32.9	26.4	30.6	6.5	-4.5	2	-2.2		OSullivan Beach	Quartzite	December 21	Yes	3:53pm	25	0	Lower	Diloma concamerata	Dry
27.3	28.8	19.2	24	9.6	-1.5	8.1	3.3		OSullivan Beach	Quartzite	December 21	No	3:08pm	25	0	Lower	Bembicium nanum	Dry
26.7	32.5	25.7	28.4	6.8	-5.8	1	-1.7		OSullivan Beach	Quartzite	December 21	Yes	3:13pm	25	0	Lower	Bembicium nanum	Dry
32.2	33.2	24	27.9	9.2	-1	8.2	4.3		OSullivan Beach	Quartzite	December 21	No	3:25pm	25	0	Lower	Bembicium nanum	Dry
28.7	33.9	21.5	28.3	12.4	-5.2	7.2	0.4		OSullivan Beach	Quartzite	December 21	No	3:44pm	25	0	Lower	Bembicium nanum	Dry
30.1	35.2	25.5	30.4	9.7	-5.1	4.6	-0.3		OSullivan Beach	Quartzite	December 21	Yes	4:06pm	25	0	Upper	Bembicium nanum	Dry
29.9	34.1	26.9	30.3	7.2	-4.2	3	-0.4		OSullivan Beach	Quartzite	December 21	Yes	4:07pm	25	0	Upper	Bembicium nanum	Dry
34.4	40	26.5	32.1	13.5	-5.6	7.9	2.3		OSullivan Beach	Quartzite	December 21	Yes	4:08pm	25	0	Upper	Bembicium nanum	Dry
34	35.6	28.2	31.7	7.4	-1.6	5.8	2.3		OSullivan Beach	Quartzite	December 21	Yes	4:10pm	25	0	Upper	Bembicium nanum	Dry
34.6	35.8	24.3	28.8	11.5	-1.2	10.3	5.8		OSullivan Beach	Quartzite	December 21	Yes	4:12pm	25	0	Upper	Bembicium nanum	Dry
31.1	36.1	27.4	30.4	8.7	-5	3.7	0.7		OSullivan Beach	Quartzite	December 21	Yes	4:14pm	25	0	Upper	Bembicium nanum	Dry
34.1	38.7	32.2	34.3	6.5	-4.6	1.9	-0.2		OSullivan Beach	Quartzite	December 21	Yes	4:15pm	25	0	Upper	Bembicium nanum	Dry
30.6	35.5	26.3	31.3	9.2	-4.9	4.3	-0.7		OSullivan Beach	Quartzite	December 21	Yes	4:18pm	25	0	Upper	Bembicium nanum	Dry
35.2	39.5	30.1	33.9	9.4	-4.3	5.1	1.3		OSullivan Beach	Quartzite	December 21	Yes	4:19pm	25	0	Upper	Bembicium nanum	Dry
33.6	38.5	29.3	33.2	9.2	-4.9	4.3	0.4		OSullivan Beach	Quartzite	December 21	Yes	4:21pm	25	0	Upper	Bembicium nanum	Dry
34	38.8	27.5	31.5	11.3	-4.8	6.5	2.5		OSullivan Beach	Quartzite	December 21	Yes	4:24pm	25	0	Upper	Bembicium nanum	Dry
31.6	37.2	27.6	31.4	9.6	-5.6	4	0.2		OSullivan Beach	Quartzite	December 21	Yes	4:25pm	25	0	Upper	Bembicium nanum	Dry
31.4	39.7	29	33.9	10.7	-8.3	2.4	-2.5		OSullivan Beach	Quartzite	December 21	Yes	4:27pm	25	0	Upper	Bembicium nanum	Dry
32.6	37.4	30	33.4	7.4	-4.8	2.6	-0.8		OSullivan Beach	Quartzite	December 21	Yes	4:28pm	25	0	Upper	Bembicium nanum	Dry
37.4	39.7	32.9	35.3	6.8	-2.3	4.5	2.1		OSullivan Beach	Quartzite	December 21	Yes	4:30pm	25	0	Upper	Bembicium nanum	Dry
30	37.1	27.3	31.6	9.8	-7.1	2.7	-1.6		OSullivan Beach	Quartzite	December 21	Yes	4:31pm	25	0	Upper	Bembicium nanum	Dry
37.3	39.7	31.3	35.2	8.4	-2.4	6	2.1		OSullivan Beach	Quartzite	December 21	Yes	4:33pm	25	0	Upper	Bembicium nanum	Dry
36.6	42.4	27.6	33.7	14.8	-5.8	9	2.9		OSullivan Beach	Quartzite	December 21	Yes	4:34pm	25	0	Upper	Bembicium nanum	Dry
32.6	34.6	24.7	29.9	9.9	-2	7.9	2.7		OSullivan Beach	Quartzite	December 21	Yes	4:35pm	25	0	Upper	Bembicium nanum	Dry
34.3	37.8	30.1	33.2	7.7	-3.5	4.2	1.1		OSullivan Beach	Quartzite	December 21	Yes	4:36pm	25	0	Upper	Bembicium nanum	Dry
30.9	38	27.5	31.8	10.5	-7.1	3.4	-0.9		OSullivan Beach	Quartzite	December 21	Yes	4:38pm	25	0	Upper	Bembicium nanum	Dry
34.3	38	27.1	32.6	10.9	-3.7	7.2	1.7		OSullivan Beach	Quartzite	December 21	Yes	4:41pm	25	0	Upper	Bembicium nanum	Dry
30.7	34.1	24.7	29.5	9.4	-3.4	6	1.2		OSullivan Beach	Quartzite	December 21	Yes	4:44pm	25	0	Upper	Bembicium nanum	Dry
30.3	35	27	30.3	8	-4.7	3.3	0		OSullivan Beach	Quartzite	December 21	Yes	4:45pm	25	0	Upper	Bembicium nanum	Dry
30.4	36	27.8	31.4	8.2	-5.6	2.6	-1		OSullivan Beach	Quartzite	December 21	Yes	4:47pm	25	0	Upper	Bembicium nanum	Dry
32.1	37	27.8	32.9	9.2	-4.9	4.3	-0.8		OSullivan Beach	Quartzite	December 21	Yes	4:49pm	25	0	Upper	Bembicium nanum	Dry
32.4	35.8	29.9	32.7	5.9	-3.4	2.5	-0.3		OSullivan Beach	Quartzite	January 3	Yes	3:02pm	28	0	Lower	Nerita atramentosa	Dry
33.5	35.6	26.2	31.6	9.4	-2.1	7.3	1.9		OSullivan Beach	Quartzite	January 3	Yes	3:03pm	28	0	Lower	Nerita atramentosa	Dry
37.5	40.1	31.1	37.3	9	-2.6	6.4	0.2		OSullivan Beach	Quartzite	January 3	Yes	3:04pm	28	0	Lower	Nerita atramentosa	Dry
30.5	36.7	27.4	31.7	9.3	-6.2	3.1	-1.2		OSullivan Beach	Quartzite	January 3	Yes	3:06pm	28	0	Lower	Nerita atramentosa	Dry
30.8	35.7	28	32.4	7.7	-4.9	2.8	-1.6		OSullivan Beach	Quartzite	January 3	Yes	3:08pm	28	0	Lower	Nerita atramentosa	Dry
32.5	36.2	31.4	33.5	4.8	-3.7	1.1	-1		OSullivan Beach	Quartzite	January 3	Yes	3:09pm	28	0	Lower	Nerita atramentosa	Dry
32	34.6	25.3	30.2	9.3	-2.6	6.7	1.8		OSullivan Beach	Quartzite	January 3	Yes	3:10pm	28	0	Lower	Nerita atramentosa	Wet
33.6	38.3	29.7	34.6	8.6	-4.7	3.9	-1		OSullivan Beach	Quartzite	January 3	Yes	3:11pm	28	0	Lower	Nerita atramentosa	Dry
31	35.3	26.2	30.9	9.1	-4.3	4.8	0.1		OSullivan Beach	Quartzite	January 3	Yes	3:13pm	28	0	Lower	Nerita atramentosa	Dry
30.8	35.3	26.7	30.1	8.6	-4.5	4.1	0.7		OSullivan Beach	Quartzite	January 3	Yes	3:14pm	28	0	Lower	Nerita atramentosa	Wet
32.6	37.4	28.7	32.5	8.7	-4.8	3.9	0.1		OSullivan Beach	Quartzite	January 3	Yes	3:16pm	28	0	Lower	Nerita atramentosa	Dry
32	36.8	28.1	32.1	8.7	-4.8	3.9	-0.1		OSullivan Beach	Quartzite	January 3	Yes	3:17pm	28	0	Lower	Nerita atramentosa	Dry
33	38.3	27.8	32.9	10.5	-5.3	5.2	0.1		OSullivan Beach	Quartzite	January 3	Yes	3:18pm	28	0	Lower	Nerita atramentosa	Dry
37	41.3	32.4	36.9	8.9	-4.3	4.6	0.1		OSullivan Beach	Quartzite	January 3	Yes	3:19pm	28	0	Lower	Nerita atramentosa	Dry
30.6	38.2	25.5	34.1	12.7	-7.6	5.1	-3.5		OSullivan Beach	Quartzite	January 3	Yes	3:20pm	28	0	Lower	Nerita atramentosa	Dry
29.1	35.9	26.7	31.5	9.2	-6.8	2.4	-2.4		OSullivan Beach	Quartzite	January 3	Yes	3:20pm	28	0	Lower	Nerita atramentosa	Dry
33.1	37.7	29.2	33.5	8.5	-4.6	3.9	-0.4		OSullivan Beach	Quartzite	January 3	Yes	3:21pm	28	0	Lower	Nerita atramentosa	Wet
28.5	38.8	28	31.5	10.8	-10.3	0.5	-3		OSullivan Beach	Quartzite	January 3	Yes	3:23pm	28	0	Lower	Nerita atramentosa	Dry
33.6	36.6	28.7	32.5	7.9	-3	4.9	1.1		OSullivan Beach	Quartzite	January 3	Yes	3:24pm	28	0	Lower	Nerita atramentosa	Dry
32.2	35.2	28.5	32.4	6.7	-3	3.7	-0.2		OSullivan Beach	Quartzite	January 3	Yes	3:26pm	28	0	Lower	Nerita atramentosa	Wet
36.8	42	30.1	35.6	11.9	-5.2	6.7	1.2		OSullivan Beach	Quartzite	January 3	Yes	3:28pm	28	0	Lower	Nerita atramentosa	Dry
30.3	38.6	28.3	32.3	10.3	-8.3	2	-2		OSullivan Beach	Quartzite	January 3	Yes	3:30pm	28	0	Lower	Nerita atramentosa	Dry
29.5	34.9	24	30	10.9	-5.4	5.5	-0.5		OSullivan Beach	Quartzite	January 3	Yes	3:32pm	28	0	Lower	Nerita atramentosa	Wet
30.1	35.6	26.4	30.6	9.2	-5.5	3.7	-0.5		OSullivan Beach	Quartzite	January 3	Yes	3:34pm	28	0	Lower	Nerita atramentosa	Wet
33	34.9	28.8	31.2	6.1	-1.9	4.2	1.8		OSullivan Beach	Quartzite	January 3	Yes	3:35pm	28	0	Lower	Nerita atramentosa	Wet
26.9	33.8	25.2	29.1	8.6	-6.9	1.7	-2.2		OSullivan Beach	Quartzite	January 3	Yes	3:37pm	28	0	Lower	Nerita atramentosa	Wet
30.7	38.2	28.9	33.8	9.3	-7.5	1.8	-3.1		OSullivan Beach	Quartzite	January 3	Yes	3:38pm	28	0	Lower	Nerita atramentosa	Wet
31.3	36.4	25.4	31.7	11	-5.1	5.9	-0.4		OSullivan Beach	Quartzite	January 3	Yes	3:47pm	28	0	Lower	Nerita atramentosa	Dry
30.1	33.1	27.6	29.9	5.5	-3	2.5	0.2		OSullivan Beach	Quartzite	January 3	Yes	3:49pm	28	0	Lower	Nerita atramentosa	Wet
28.2	33.3	25.1	28.7	8.2	-5.1	3.1	-0.5		OSullivan Beach	Quartzite	January 3	Yes	3:50pm	28	0	Lower	Nerita atramentosa	Wet
32.3	36.7	27.4	31.7	9.3	-4.4	4.9	0.6		OSullivan Beach	Quartzite	January 3	No	3:06pm	28	0	Lower	Diloma concamerata	Dry
32.8	39.1	30.3	34.3	8.8	-6.3	2.5	-1.5		OSullivan Beach	Quartzite	January 3	Yes	3:14pm	28	0	Lower	Diloma concamerata	Dry
30.3	35.3	25.8	30.1	9.5	-5	4.5	0.2		OSullivan Beach	Quartzite	January 3	No	3:14pm	28	0	Lower	Diloma concamerata	Wet
30.8	36.8	28.1	32.1	8.7	-6	2.7	-1.3		OSullivan Beach	Quartzite	January 3	No	3:17pm	28	0	Lower	Diloma concamerata	Wet
30.3	35.9	26.7	31.5	9.2	-5.6	3.6	-1.2		OSullivan Beach	Quartzite	January 3	No	3:20pm	28	0	Lower	Diloma concamerata	Dry
32.8	37.7	29.2	33.5	8.5	-4.9	3.6	-0.7		OSullivan Beach	Quartzite	January 3	No	3:21pm	28	0	Lower	Diloma concamerata	Wet
30.5	35	26.4	30.4	8.6	-4.5	4.1	0.1		OSullivan Beach	Quartzite	January 3	Yes	3:22pm	28	0	Lower	Diloma concamerata	Wet
30	38.8	27.8	31.5	11	-8.8	2.2	-1.5		OSullivan Beach	Quartzite	January 3	No	3:23pm	28	0	Lower	Diloma concamerata	Wet
31.4	41.7	28.7	33.2	13	-10.3	2.7	-1.8		OSullivan Beach	Quartzite	January 3	Yes	3:25pm	28	0	Lower	Diloma concamerata	Dry
33.1	41.7	27.4	33.8	14.3	-8.6	5.7	-0.7		OSullivan Beach	Quartzite	January 3	Yes	3:29pm	28	0	Lower	Diloma concamerata	Wet
29.4	34.9	24	30	10.9	-5.5	5.4	-0.6		OSullivan Beach	Quartzite	January 3	No	3:32pm	28	0	Lower	Diloma concamerata	Dry
30.3	37.8	24.6	32	13.2	-7.5	5.7	-1.7		OSullivan Beach	Quartzite	January 3	Yes	3:33pm	28	0	Lower	Diloma concamerata	Dry
31	35.6	26.8	30.6	8.8	-4.6	4.2	0.4		OSullivan Beach	Quartzite	January 3	No	3:34pm	28	0	Lower	Diloma concamerata	Wet
30.3	34.9	28.8	31.2	6.1	-4.6	1.5	-0.9		OSullivan Beach	Quartzite	January 3	No	3:35pm	28	0	Lower	Diloma concamerata	Wet
34	38.4	30.2	33.9	8.2	-4.4	3.8	0.1		OSullivan Beach	Quartzite	January 3	Yes	3:36pm	28	0	Lower	Diloma concamerata	Dry
28.9	33.8	25.2	29.1	8.6	-4.9	3.7	-0.2		OSullivan Beach	Quartzite	January 3	No	3:37pm	28	0	Lower	Diloma concamerata	Wet
31.1	38.2	28.9	33.8	9.3	-7.1	2.2	-2.7		OSullivan Beach	Quartzite	January 3	No	3:38pm	28	0	Lower	Diloma concamerata	Wet
30.5	35.1	25.9	30.5	9.2	-4.6	4.6	0		OSullivan Beach	Quartzite	January 3	Yes	3:39pm	28	0	Lower	Diloma concamerata	Wet
30.4	36.8	27.2	30.9	9.6	-6.4	3.2	-0.5		OSullivan Beach	Quartzite	January 3	Yes	3:42pm	28	0	Lower	Diloma concamerata	Wet
30.1	36.3	25.6	30.2	10.7	-6.2	4.5	-0.1		OSullivan Beach	Quartzite	January 3	Yes	3:45pm	28	0	Lower	Diloma concamerata	Dry
27.7	32.8	26.1	29.1	6.7	-5.1	1.6	-1.4		OSullivan Beach	Quartzite	January 3	Yes	3:46pm	28	0	Lower	Diloma concamerata	Dry
31.3	36.4	25.4	31.7	11	-5.1	5.9	-0.4		OSullivan Beach	Quartzite	January 3	No	3:47pm	28	0	Lower	Diloma concamerata	Dry
30	33.1	27	29.9	6.1	-3.1	3	0.1		OSullivan Beach	Quartzite	January 3	No	3:49pm	28	0	Lower	Diloma concamerata	Wet
28.4	33.3	25.1	28.7	8.2	-4.9	3.3	-0.3		OSullivan Beach	Quartzite	January 3	No	3:50pm	28	0	Lower	Diloma concamerata	Wet
29.4	36.3	28	32.1	8.3	-6.9	1.4	-2.7		OSullivan Beach	Quartzite	January 3	Yes	3:52pm	28	0	Lower	Diloma concamerata	Wet
30.4	32.5	26.1	30.1	6.4	-2.1	4.3	0.3		OSullivan Beach	Quartzite	January 3	Yes	3:53pm	28	0	Lower	Diloma concamerata	Wet
33.1	37.8	28.8	32.1	9	-4.7	4.3	1		OSullivan Beach	Quartzite	January 3	Yes	3:54pm	28	0	Lower	Diloma concamerata	Wet
32.6	34.9	28.4	32	6.5	-2.3	4.2	0.6		OSullivan Beach	Quartzite	January 3	Yes	3:55pm	28	0	Lower	Diloma concamerata	Wet
33.4	37.8	28.3	32.2	9.5	-4.4	5.1	1.2		OSullivan Beach	Quartzite	January 3	Yes	3:56pm	28	0	Lower	Diloma concamerata	Wet
29.8	32.9	27.3	30.7	5.6	-3.1	2.5	-0.9		OSullivan Beach	Quartzite	January 3	Yes	4:14pm	27	0	Upper	Diloma concamerata	Wet
36.8	39.7	29.3	35.4	10.4	-2.9	7.5	1.4		OSullivan Beach	Quartzite	January 3	No	3:00pm	28	0	Lower	Bembicium nanum	Dry
34.4	36.2	31	33.5	5.2	-1.8	3.4	0.9		OSullivan Beach	Quartzite	January 3	No	3:09pm	28	0	Lower	Bembicium nanum	Dry
35.1	45.1	28.2	34.1	16.9	-10	6.9	1		OSullivan Beach	Quartzite	January 3	Yes	3:57pm	28	0	Lower	Bembicium nanum	Dry
33.9	37.8	29	34.1	8.8	-3.9	4.9	-0.2		OSullivan Beach	Quartzite	January 3	Yes	4:03pm	27	0	Upper	Bembicium nanum	Dry
36.7	43.1	31.3	35.4	11.8	-6.4	5.4	1.3		OSullivan Beach	Quartzite	January 3	Yes	4:05pm	27	0	Upper	Bembicium nanum	Dry
34.8	37.6	27.8	32.4	9.8	-2.8	7	2.4		OSullivan Beach	Quartzite	January 3	Yes	4:06pm	27	0	Upper	Bembicium nanum	Dry
34.4	39.8	30.6	35.3	9.2	-5.4	3.8	-0.9		OSullivan Beach	Quartzite	January 3	Yes	4:07pm	27	0	Upper	Bembicium nanum	Dry
38.4	41	32.6	36.2	8.4	-2.6	5.8	2.2		OSullivan Beach	Quartzite	January 3	Yes	4:09pm	27	0	Upper	Bembicium nanum	Dry
36.4	40.1	32.7	35.7	7.4	-3.7	3.7	0.7		OSullivan Beach	Quartzite	January 3	Yes	4:10pm	27	0	Upper	Bembicium nanum	Dry
33	35.5	26.5	31.2	9	-2.5	6.5	1.8		OSullivan Beach	Quartzite	January 3	Yes	4:11pm	27	0	Upper	Bembicium nanum	Dry
33.4	39.3	30.2	34.2	9.1	-5.9	3.2	-0.8		OSullivan Beach	Quartzite	January 3	Yes	4:12pm	27	0	Upper	Bembicium nanum	Dry
34	37.9	30.5	33.9	7.4	-3.9	3.5	0.1		OSullivan Beach	Quartzite	January 3	Yes	4:13pm	27	0	Upper	Bembicium nanum	Dry
37.3	40.1	33.5	35.5	6.6	-2.8	3.8	1.8		OSullivan Beach	Quartzite	January 3	Yes	4:16pm	27	0	Upper	Bembicium nanum	Dry
35.5	42.2	31.5	36.2	10.7	-6.7	4	-0.7		OSullivan Beach	Quartzite	January 3	Yes	4:18pm	27	0	Upper	Bembicium nanum	Dry
33.6	37.8	28.1	33	9.7	-4.2	5.5	0.6		OSullivan Beach	Quartzite	January 3	Yes	4:19pm	27	0	Upper	Bembicium nanum	Dry
34.8	39.2	29.8	34.5	9.4	-4.4	5	0.3		OSullivan Beach	Quartzite	January 3	Yes	4:21pm	27	0	Upper	Bembicium nanum	Dry
30.9	36.3	29	32.4	7.3	-5.4	1.9	-1.5		OSullivan Beach	Quartzite	January 3	Yes	4:23pm	27	1	Upper	Bembicium nanum	Dry
30.1	36.1	26.7	30.1	9.4	-6	3.4	0		OSullivan Beach	Quartzite	January 3	Yes	4:24pm	27	1	Upper	Bembicium nanum	Dry
36.8	41.5	32.1	36.2	9.4	-4.7	4.7	0.6		OSullivan Beach	Quartzite	January 3	Yes	4:25pm	27	1	Upper	Bembicium nanum	Dry
34.1	37.6	28.6	32	9	-3.5	5.5	2.1		OSullivan Beach	Quartzite	January 3	Yes	4:26pm	27	1	Upper	Bembicium nanum	Dry
33.3	39.2	30.8	35	8.4	-5.9	2.5	-1.7		OSullivan Beach	Quartzite	January 3	Yes	4:27pm	27	1	Upper	Bembicium nanum	Dry
35.9	38.4	30.6	34.9	7.8	-2.5	5.3	1		OSullivan Beach	Quartzite	January 3	Yes	4:28pm	27	1	Upper	Bembicium nanum	Dry
34.1	39	30	34.3	9	-4.9	4.1	-0.2		OSullivan Beach	Quartzite	January 3	Yes	4:29pm	27	1	Upper	Bembicium nanum	Dry
35.1	38.2	30.9	34.4	7.3	-3.1	4.2	0.7		OSullivan Beach	Quartzite	January 3	Yes	4:30pm	27	1	Upper	Bembicium nanum	Dry
34.8	38.8	31.4	34.3	7.4	-4	3.4	0.5		OSullivan Beach	Quartzite	January 3	Yes	4:31pm	27	1	Upper	Bembicium nanum	Dry
38.4	42	35.8	38.7	6.2	-3.6	2.6	-0.3		OSullivan Beach	Quartzite	January 3	Yes	4:33pm	27	1	Upper	Bembicium nanum	Dry
33.4	40.2	31	35	9.2	-6.8	2.4	-1.6		OSullivan Beach	Quartzite	January 3	Yes	4:34pm	27	1	Upper	Bembicium nanum	Dry
33	38.3	29.1	34.7	9.2	-5.3	3.9	-1.7		OSullivan Beach	Quartzite	January 3	Yes	4:35pm	27	1	Upper	Bembicium nanum	Dry
31.4	36.5	25.2	30.4	11.3	-5.1	6.2	1		OSullivan Beach	Quartzite	January 3	Yes	4:36pm	27	1	Upper	Bembicium nanum	Wet
32.4	41	30.5	35.5	10.5	-8.6	1.9	-3.1		OSullivan Beach	Quartzite	January 3	Yes	4:37pm	27	1	Upper	Bembicium nanum	Dry
31.2	40.2	29.4	34	10.8	-9	1.8	-2.8		Marino Rocks	Grey siltstone	January 4	Yes	3:15pm	33	0	Lower	Nerita atramentosa	Wet
34.2	44	31.3	38.4	12.7	-9.8	2.9	-4.2		Marino Rocks	Grey siltstone	January 4	Yes	3:16pm	33	0	Lower	Nerita atramentosa	Dry
32.5	38.4	31.4	33.5	7	-5.9	1.1	-1		Marino Rocks	Grey siltstone	January 4	Yes	3:31pm	33	0	Lower	Nerita atramentosa	Wet
36.4	47.1	34.4	38.6	12.7	-10.7	2	-2.2		Marino Rocks	Grey siltstone	January 4	Yes	3:35pm	33	0	Lower	Nerita atramentosa	Wet
32.3	40.8	31.9	35.6	8.9	-8.5	0.4	-3.3		Marino Rocks	Grey siltstone	January 4	Yes	3:37pm	33	0	Lower	Nerita atramentosa	Wet
39.1	45	33.3	36.8	11.7	-5.9	5.8	2.3		Marino Rocks	Grey siltstone	January 4	Yes	3:39pm	33	0	Lower	Nerita atramentosa	Wet
34.5	38.6	29.4	32.4	9.2	-4.1	5.1	2.1		Marino Rocks	Grey siltstone	January 4	Yes	3:40pm	33	0	Lower	Nerita atramentosa	Wet
30.7	39.2	30.7	33.6	8.5	-8.5	0	-2.9		Marino Rocks	Grey siltstone	January 4	Yes	3:43pm	33	0	Lower	Nerita atramentosa	Wet
34.2	42.3	30.3	36.4	12	-8.1	3.9	-2.2		Marino Rocks	Grey siltstone	January 4	Yes	3:20pm	33	0	Lower	Nerita atramentosa	Dry
38.6	44.2	35.7	39.9	8.5	-5.6	2.9	-1.3		Marino Rocks	Grey siltstone	January 4	Yes	3:47pm	33	0	Lower	Nerita atramentosa	Dry
28.9	39	27.7	32.3	11.3	-10.1	1.2	-3.4		Marino Rocks	Grey siltstone	January 4	Yes	3:48pm	33	0	Lower	Nerita atramentosa	Wet
37.1	42.4	33.4	37.7	9	-5.3	3.7	-0.6		Marino Rocks	Grey siltstone	January 4	Yes	4:02pm	33	0	Lower	Nerita atramentosa	Dry
36.4	44.7	33.5	39.6	11.2	-8.3	2.9	-3.2		Marino Rocks	Grey siltstone	January 4	Yes	4:03pm	33	0	Lower	Nerita atramentosa	Dry
33.4	42.9	32.3	37.6	10.6	-9.5	1.1	-4.2		Marino Rocks	Grey siltstone	January 4	Yes	3:23pm	33	0	Lower	Nerita atramentosa	Wet
37.9	44	34.9	39.4	9.1	-6.1	3	-1.5		Marino Rocks	Grey siltstone	January 4	Yes	4:05pm	33	0	Lower	Nerita atramentosa	Wet
32.6	34.5	31	32.6	3.5	-1.9	1.6	0		Marino Rocks	Grey siltstone	January 4	Yes	4:07pm	33	0	Lower	Nerita atramentosa	Wet
39.9	43.4	34.3	39.9	9.1	-3.5	5.6	0		Marino Rocks	Grey siltstone	January 4	Yes	4:08pm	33	0	Lower	Nerita atramentosa	Dry
35.5	44.7	31.1	36.9	13.6	-9.2	4.4	-1.4		Marino Rocks	Grey siltstone	January 4	Yes	4:08pm	33	0	Lower	Nerita atramentosa	Wet
36.5	41.5	33.1	36.8	8.4	-5	3.4	-0.3		Marino Rocks	Grey siltstone	January 4	Yes	3:27pm	33	0	Lower	Nerita atramentosa	Dry
30.8	39.7	28.8	33.5	10.9	-8.9	2	-2.7		Marino Rocks	Grey siltstone	January 4	Yes	3:28pm	33	0	Lower	Nerita atramentosa	Wet
36.4	43.4	30.9	36.2	12.5	-7	5.5	0.2		Marino Rocks	Grey siltstone	January 4	Yes	4:10pm	33	0	Lower	Nerita atramentosa	Wet
39.2	44.1	34.8	40.2	9.3	-4.9	4.4	-1		Marino Rocks	Grey siltstone	January 4	Yes	4:10pm	33	0	Lower	Nerita atramentosa	Dry
34	40.7	30.8	36.8	9.9	-6.7	3.2	-2.8		Marino Rocks	Grey siltstone	January 4	Yes	4:11pm	33	0	Lower	Nerita atramentosa	Wet
34.6	42.3	33.4	38.1	8.9	-7.7	1.2	-3.5		Marino Rocks	Grey siltstone	January 4	Yes	4:12pm	33	0	Lower	Nerita atramentosa	Dry
34.7	42.2	31.8	35.2	10.4	-7.5	2.9	-0.5		Marino Rocks	Grey siltstone	January 4	Yes	4:13pm	33	0	Lower	Nerita atramentosa	Wet
35.4	43.2	33	37.4	10.2	-7.8	2.4	-2		Marino Rocks	Grey siltstone	January 4	Yes	4:18pm	33	0	Lower	Nerita atramentosa	Wet
33.7	43.1	32.1	37	11	-9.4	1.6	-3.3		Marino Rocks	Grey siltstone	January 4	Yes	4:19pm	33	0	Lower	Nerita atramentosa	Wet
34.4	37.5	31.5	34	6	-3.1	2.9	0.4		Marino Rocks	Grey siltstone	January 4	Yes	4:23pm	33	0	Lower	Nerita atramentosa	Wet
36.1	40.1	31.8	35.3	8.3	-4	4.3	0.8		Marino Rocks	Grey siltstone	January 4	Yes	4:27pm	33	0	Lower	Nerita atramentosa	Wet
35.8	43.3	34.5	39.3	8.8	-7.5	1.3	-3.5		Marino Rocks	Grey siltstone	January 4	Yes	4:32pm	33	0	Lower	Nerita atramentosa	Wet
34.1	37.5	29.6	33.6	7.9	-3.4	4.5	0.5		Marino Rocks	Grey siltstone	January 4	Yes	3:34pm	33	0	Lower	Diloma concamerata	Wet
36.4	47.1	34.4	38.6	12.7	-10.7	2	-2.2		Marino Rocks	Grey siltstone	January 4	No	3:35pm	33	0	Lower	Diloma concamerata	Wet
33.8	38.6	29.4	32.4	9.2	-4.8	4.4	1.4		Marino Rocks	Grey siltstone	January 4	No	3:40pm	33	0	Lower	Diloma concamerata	Wet
37.8	42.4	33.4	38.6	9	-4.6	4.4	-0.8		Marino Rocks	Grey siltstone	January 4	Yes	3:41pm	33	0	Lower	Diloma concamerata	Dry
32.4	38.6	30.3	33.4	8.3	-6.2	2.1	-1		Marino Rocks	Grey siltstone	January 4	Yes	4:04pm	33	0	Lower	Diloma concamerata	Wet
35.9	38.1	33.4	38.1	4.7	-2.2	2.5	-2.2		Marino Rocks	Grey siltstone	January 4	No	4:12pm	33	0	Lower	Diloma concamerata	Dry
35.5	43.2	33	37.4	10.2	-7.7	2.5	-1.9		Marino Rocks	Grey siltstone	January 4	No	4:18pm	33	0	Lower	Diloma concamerata	Wet
34.7	43.1	32.1	37	11	-8.4	2.6	-2.3		Marino Rocks	Grey siltstone	January 4	No	4:19pm	33	0	Lower	Diloma concamerata	Wet
36.8	41.3	33.8	36.2	7.5	-4.5	3	0.6		Marino Rocks	Grey siltstone	January 4	Yes	4:26pm	33	0	Lower	Diloma concamerata	Wet
37.2	41.3	33.2	38.4	8.1	-4.1	4	-1.2		Marino Rocks	Grey siltstone	January 4	Yes	4:30pm	33	0	Lower	Diloma concamerata	Dry
35.2	43.3	34.3	39.3	9	-8.1	0.9	-4.1		Marino Rocks	Grey siltstone	January 4	No	4:32pm	33	0	Lower	Diloma concamerata	Wet
32.2	40.9	31.4	35.8	9.5	-8.7	0.8	-3.6		Marino Rocks	Grey siltstone	January 4	Yes	4:36pm	33	0	Lower	Diloma concamerata	Wet
37.3	42.8	32.4	35.4	10.4	-5.5	4.9	1.9		Marino Rocks	Grey siltstone	January 4	Yes	4:35pm	33	0	Lower	Diloma concamerata	Wet
37.2	44.7	35	38.9	9.7	-7.5	2.2	-1.7		Marino Rocks	Grey siltstone	January 4	Yes	4:38pm	33	0	Lower	Diloma concamerata	Dry
37.5	42	36.5	38.5	5.5	-4.5	1	-1		Marino Rocks	Grey siltstone	January 4	Yes	4:40pm	33	0	Lower	Diloma concamerata	Dry
34.9	41.4	32	35.3	9.4	-6.5	2.9	-0.4		Marino Rocks	Grey siltstone	January 4	Yes	4:46pm	33	0	Lower	Diloma concamerata	Wet
31.2	39	29.9	32.9	9.1	-7.8	1.3	-1.7		Marino Rocks	Grey siltstone	January 4	Yes	4:46pm	33	0	Lower	Diloma concamerata	Wet
33.6	39.3	29.4	33.5	9.9	-5.7	4.2	0.1		Marino Rocks	Grey siltstone	January 4	Yes	4:47pm	33	0	Lower	Diloma concamerata	Wet
41.1	46.2	39.7	42.4	6.5	-5.1	1.4	-1.3		Marino Rocks	Grey siltstone	January 4	Yes	5:37pm	33	0	Upper	Diloma concamerata	Dry
39.1	39.6	33.8	39.6	5.8	-0.5	5.3	-0.5		Marino Rocks	Grey siltstone	January 4	No	4:03pm	33	0	Lower	Bembicium nanum	Dry
37.6	43.4	31.8	36.2	11.6	-5.8	5.8	1.4		Marino Rocks	Grey siltstone	January 4	No	4:10pm	33	0	Lower	Bembicium nanum	Wet
35.6	42.3	33.4	38.1	8.9	-6.7	2.2	-2.5		Marino Rocks	Grey siltstone	January 4	No	4:12pm	33	0	Lower	Bembicium nanum	Dry
39	43.2	33	37.4	10.2	-4.2	6	1.6		Marino Rocks	Grey siltstone	January 4	No	4:18pm	33	0	Lower	Bembicium nanum	Wet
39.2	46.9	38	41.2	8.9	-7.7	1.2	-2		Marino Rocks	Grey siltstone	January 4	Yes	4:21pm	33	0	Lower	Bembicium nanum	Dry
42.4	45.8	40.4	42.4	5.4	-3.4	2	0		Marino Rocks	Grey siltstone	January 4	Yes	4:24pm	33	0	Lower	Bembicium nanum	Dry
37.1	41	34.1	38.1	6.9	-3.9	3	-1		Marino Rocks	Grey siltstone	January 4	Yes	4:39pm	33	0	Lower	Bembicium nanum	Dry
37.1	43.9	31.6	37.1	12.3	-6.8	5.5	0		Marino Rocks	Grey siltstone	January 4	Yes	4:52pm	33	0	Lower	Bembicium nanum	Dry
37.3	44.4	32.6	38.2	11.8	-7.1	4.7	-0.9		Marino Rocks	Grey siltstone	January 4	Yes	4:53pm	33	0	Lower	Bembicium nanum	Dry
35.4	41.9	30.4	35.8	11.5	-6.5	5	-0.4		Marino Rocks	Grey siltstone	January 4	Yes	4:54pm	33	0	Lower	Bembicium nanum	Wet
38	41.8	32.2	34.7	9.6	-3.8	5.8	3.3		Marino Rocks	Grey siltstone	January 4	Yes	4:55pm	33	0	Lower	Bembicium nanum	Wet
41.8	44.8	33.9	39	10.9	-3	7.9	2.8		Marino Rocks	Grey siltstone	January 4	Yes	4:56pm	33	0	Lower	Bembicium nanum	Dry
42.3	47.7	39	42.4	8.7	-5.4	3.3	-0.1		Marino Rocks	Grey siltstone	January 4	Yes	5:14pm	33	0	Upper	Bembicium nanum	Dry
39.4	47	32	41.6	15	-7.6	7.4	-2.2		Marino Rocks	Grey siltstone	January 4	Yes	5:16pm	33	0	Upper	Bembicium nanum	Dry
38.3	46	36.8	41.3	9.2	-7.7	1.5	-3		Marino Rocks	Grey siltstone	January 4	Yes	5:17pm	33	0	Upper	Bembicium nanum	Dry
36.9	38.9	33.9	35.4	5	-2	3	1.5		Marino Rocks	Grey siltstone	January 4	Yes	5:22pm	33	0	Upper	Bembicium nanum	Dry
37.9	47.4	37.1	42.5	10.3	-9.5	0.8	-4.6		Marino Rocks	Grey siltstone	January 4	Yes	5:23pm	33	0	Upper	Bembicium nanum	Dry
40.9	44.2	38.4	40.8	5.8	-3.3	2.5	0.1		Marino Rocks	Grey siltstone	January 4	Yes	3:25pm	33	0	Lower	Bembicium nanum	Dry
41.3	43.4	33.7	37.6	9.7	-2.1	7.6	3.7		Marino Rocks	Grey siltstone	January 4	Yes	3:26pm	33	0	Lower	Bembicium nanum	Wet
42.4	45.9	39	41.9	6.9	-3.5	3.4	0.5		Marino Rocks	Grey siltstone	January 4	Yes	5:26pm	33	0	Upper	Bembicium nanum	Dry
37.3	41.1	35.5	37.9	5.6	-3.8	1.8	-0.6		Marino Rocks	Grey siltstone	January 4	Yes	5:29pm	33	0	Upper	Bembicium nanum	Dry
44.3	45.7	36.8	40.4	8.9	-1.4	7.5	3.9		Marino Rocks	Grey siltstone	January 4	Yes	5:31pm	33	0	Upper	Bembicium nanum	Dry
42.8	46.6	39.7	43.3	6.9	-3.8	3.1	-0.5		Marino Rocks	Grey siltstone	January 4	Yes	5:32pm	33	0	Upper	Bembicium nanum	Dry
41.7	47.5	38.4	42.7	9.1	-5.8	3.3	-1		Marino Rocks	Grey siltstone	January 4	Yes	5:34pm	33	0	Upper	Bembicium nanum	Dry
40.3	46.2	39.7	42.4	6.5	-5.9	0.6	-2.1		Marino Rocks	Grey siltstone	January 4	No	5:37pm	33	0	Upper	Bembicium nanum	Dry
40	47	37.7	41.6	9.3	-7	2.3	-1.6		Marino Rocks	Grey siltstone	January 4	Yes	5:38pm	33	0	Upper	Bembicium nanum	Dry
41.8	46.8	38.2	42	8.6	-5	3.6	-0.2		Marino Rocks	Grey siltstone	January 4	Yes	5:39pm	33	0	Upper	Bembicium nanum	Dry
42.7	48.2	39.3	43.2	8.9	-5.5	3.4	-0.5		Marino Rocks	Grey siltstone	January 4	Yes	5:41pm	33	0	Upper	Bembicium nanum	Dry
40	46.6	37.8	41	8.8	-6.6	2.2	-1		Marino Rocks	Grey siltstone	January 4	Yes	5:43pm	33	0	Upper	Bembicium nanum	Dry
39.3	45.7	36.3	40	9.4	-6.4	3	-0.7		Marino Rocks	Grey siltstone	January 4	Yes	5:44pm	33	0	Upper	Bembicium nanum	Dry
32.5	40.3	30.6	34.4	9.7	-7.8	1.9	-1.9		Marino Rocks	Grey siltstone	January 5	Yes	3:05pm	35	0	Lower	Nerita atramentosa	Wet
31	46.6	30.9	39.5	15.7	-15.6	0.1	-8.5		Marino Rocks	Grey siltstone	January 5	Yes	3:09pm	35	0	Lower	Nerita atramentosa	Wet
32.9	38.1	32.4	34.8	5.7	-5.2	0.5	-1.9		Marino Rocks	Grey siltstone	January 5	Yes	3:10pm	35	0	Lower	Nerita atramentosa	Wet
41	47.7	39.9	42.5	7.8	-6.7	1.1	-1.5		Marino Rocks	Grey siltstone	January 5	Yes	3:14pm	35	0	Lower	Nerita atramentosa	Dry
37.8	43.7	35.9	39.4	7.8	-5.9	1.9	-1.6		Marino Rocks	Grey siltstone	January 5	Yes	3:16pm	35	0	Lower	Nerita atramentosa	Wet
36.4	41.1	31.4	35.6	9.7	-4.7	5	0.8		Marino Rocks	Grey siltstone	January 5	Yes	3:20pm	35	0	Lower	Nerita atramentosa	Wet
38.7	47	34.9	39.3	12.1	-8.3	3.8	-0.6		Marino Rocks	Grey siltstone	January 5	Yes	3:21pm	35	0	Lower	Nerita atramentosa	Wet
34.2	41.2	32.8	35.6	8.4	-7	1.4	-1.4		Marino Rocks	Grey siltstone	January 5	Yes	3:24pm	35	0	Lower	Nerita atramentosa	Wet
30.9	43.6	30.4	35.2	13.2	-12.7	0.5	-4.3		Marino Rocks	Grey siltstone	January 5	Yes	3:25pm	35	0	Lower	Nerita atramentosa	Wet
42.8	47.1	41.3	42.8	5.8	-4.3	1.5	0		Marino Rocks	Grey siltstone	January 5	Yes	3:30pm	35	0	Lower	Nerita atramentosa	Dry
35.6	43.3	33.1	37	10.2	-7.7	2.5	-1.4		Marino Rocks	Grey siltstone	January 5	Yes	3:30pm	35	0	Lower	Nerita atramentosa	Wet
43.5	47.4	42.7	44.2	4.7	-3.9	0.8	-0.7		Marino Rocks	Grey siltstone	January 5	Yes	3:34pm	35	0	Lower	Nerita atramentosa	Dry
38.5	46	37.6	41.9	8.4	-7.5	0.9	-3.4		Marino Rocks	Grey siltstone	January 5	Yes	3:36pm	35	0	Lower	Nerita atramentosa	Dry
35.2	42.1	30.7	35.6	11.4	-6.9	4.5	-0.4		Marino Rocks	Grey siltstone	January 5	Yes	3:54pm	35	0	Lower	Nerita atramentosa	Wet
34.1	41.7	31.4	34.6	10.3	-7.6	2.7	-0.5		Marino Rocks	Grey siltstone	January 5	Yes	3:56pm	35	0	Lower	Nerita atramentosa	Wet
32.8	45.1	31.2	36.8	13.9	-12.3	1.6	-4		Marino Rocks	Grey siltstone	January 5	Yes	3:58pm	34	0	Lower	Nerita atramentosa	Wet
33.1	42	29.7	36	12.3	-8.9	3.4	-2.9		Marino Rocks	Grey siltstone	January 5	Yes	3:58pm	34	0	Lower	Nerita atramentosa	Wet
38	42.3	36.4	39	5.9	-4.3	1.6	-1		Marino Rocks	Grey siltstone	January 5	Yes	4:05pm	34	0	Lower	Nerita atramentosa	Dry
35	42.4	33.7	37.9	8.7	-7.4	1.3	-2.9		Marino Rocks	Grey siltstone	January 5	Yes	4:08pm	34	0	Lower	Nerita atramentosa	Wet
46.3	50.8	42.2	45.5	8.6	-4.5	4.1	0.8		Marino Rocks	Grey siltstone	January 5	Yes	4:09pm	34	0	Lower	Nerita atramentosa	Dry
33.4	35.7	30.5	32.3	5.2	-2.3	2.9	1.1		Marino Rocks	Grey siltstone	January 5	Yes	4:11pm	34	0	Lower	Nerita atramentosa	Wet
41	45.3	35.8	39.4	9.5	-4.3	5.2	1.6		Marino Rocks	Grey siltstone	January 5	Yes	4:12pm	34	0	Lower	Nerita atramentosa	Dry
36.8	42	35.2	38.6	6.8	-5.2	1.6	-1.8		Marino Rocks	Grey siltstone	January 5	Yes	4:14pm	34	0	Lower	Nerita atramentosa	Wet
37.5	48.3	37.5	43.6	10.8	-10.8	0	-6.1		Marino Rocks	Grey siltstone	January 5	Yes	4:21pm	34	0	Lower	Nerita atramentosa	Dry
35.2	40.2	33.7	35.9	6.5	-5	1.5	-0.7		Marino Rocks	Grey siltstone	January 5	Yes	4:22pm	34	0	Lower	Nerita atramentosa	Wet
40.1	43.2	29.8	34.7	13.4	-3.1	10.3	5.4		Marino Rocks	Grey siltstone	January 5	Yes	4:24pm	34	0	Lower	Nerita atramentosa	Wet
36.7	39.5	31.9	35.3	7.6	-2.8	4.8	1.4		Marino Rocks	Grey siltstone	January 5	Yes	4:25pm	34	0	Lower	Nerita atramentosa	Wet
37.6	43.9	32.4	37.1	11.5	-6.3	5.2	0.5		Marino Rocks	Grey siltstone	January 5	Yes	4:26pm	34	0	Lower	Nerita atramentosa	Wet
34.8	45.3	33.7	39	11.6	-10.5	1.1	-4.2		Marino Rocks	Grey siltstone	January 5	Yes	4:28pm	34	0	Lower	Nerita atramentosa	Wet
40.5	47.1	35.8	41.5	11.3	-6.6	4.7	-1		Marino Rocks	Grey siltstone	January 5	Yes	4:30pm	34	0	Lower	Nerita atramentosa	Wet
32.9	46.6	30.9	39.5	15.7	-13.7	2	-6.6		Marino Rocks	Grey siltstone	January 5	No	3:09pm	35	0	Lower	Diloma concamerata	Wet
39	47.2	34.2	40	13	-8.2	4.8	-1		Marino Rocks	Grey siltstone	January 5	Yes	3:12pm	35	0	Lower	Diloma concamerata	Wet
36.5	39.6	31.7	33.8	7.9	-3.1	4.8	2.7		Marino Rocks	Grey siltstone	January 5	Yes	3:15pm	35	0	Lower	Diloma concamerata	Wet
38.7	40.5	33.3	37.3	7.2	-1.8	5.4	1.4		Marino Rocks	Grey siltstone	January 5	Yes	3:18pm	35	0	Lower	Diloma concamerata	Dry
35.3	47	34.9	39.3	12.1	-11.7	0.4	-4		Marino Rocks	Grey siltstone	January 5	No	3:21pm	35	0	Lower	Diloma concamerata	Wet
37.1	43.6	30.4	35.2	13.2	-6.5	6.7	1.9		Marino Rocks	Grey siltstone	January 5	No	3:25pm	35	0	Lower	Diloma concamerata	Wet
34.7	42.2	32.3	37.1	9.9	-7.5	2.4	-2.4		Marino Rocks	Grey siltstone	January 5	Yes	3:27pm	35	0	Lower	Diloma concamerata	Wet
39.1	44	35.4	39.7	8.6	-4.9	3.7	-0.6		Marino Rocks	Grey siltstone	January 5	Yes	3:28pm	35	0	Lower	Diloma concamerata	Wet
38.1	46	37.8	41.9	8.2	-7.9	0.3	-3.8		Marino Rocks	Grey siltstone	January 5	No	3:36pm	35	0	Lower	Diloma concamerata	Dry
40.8	42.4	38.3	42.4	4.1	-1.6	2.5	-1.6		Marino Rocks	Grey siltstone	January 5	Yes	3:37pm	35	0	Lower	Diloma concamerata	Dry
32.6	47.9	30.7	39.3	17.2	-15.3	1.9	-6.7		Marino Rocks	Grey siltstone	January 5	Yes	3:55pm	35	0	Lower	Diloma concamerata	Wet
34.4	45.1	31.6	36.8	13.5	-10.7	2.8	-2.4		Marino Rocks	Grey siltstone	January 5	No	3:58pm	34	0	Lower	Diloma concamerata	Wet
35.3	42.2	32.8	36.4	9.4	-6.9	2.5	-1.1		Marino Rocks	Grey siltstone	January 5	Yes	4:06pm	34	0	Lower	Diloma concamerata	Wet
36.6	42.4	33.6	37.9	8.8	-5.8	3	-1.3		Marino Rocks	Grey siltstone	January 5	No	4:08pm	34	0	Lower	Diloma concamerata	Wet
32	35.7	30.6	32.3	5.1	-3.7	1.4	-0.3		Marino Rocks	Grey siltstone	January 5	No	4:11pm	34	0	Lower	Diloma concamerata	Wet
36.1	42.8	35	38.6	7.8	-6.7	1.1	-2.5		Marino Rocks	Grey siltstone	January 5	No	4:14pm	34	0	Lower	Diloma concamerata	Wet
36.8	40.2	33.7	35.9	6.5	-3.4	3.1	0.9		Marino Rocks	Grey siltstone	January 5	No	4:22pm	34	0	Lower	Diloma concamerata	Wet
34.6	46.3	33.7	39	12.6	-11.7	0.9	-4.4		Marino Rocks	Grey siltstone	January 5	No	4:28pm	34	0	Lower	Diloma concamerata	Wet
36.3	45.8	34.3	39.9	11.5	-9.5	2	-3.6		Marino Rocks	Grey siltstone	January 5	Yes	4:32pm	34	0	Lower	Diloma concamerata	Wet
34.2	37.9	29.9	33.2	8	-3.7	4.3	1		Marino Rocks	Grey siltstone	January 5	Yes	4:38pm	34	0	Lower	Diloma concamerata	Wet
38.7	40.3	36.5	40.3	3.8	-1.6	2.2	-1.6		Marino Rocks	Grey siltstone	January 5	Yes	4:40pm	34	0	Lower	Diloma concamerata	Wet
33.3	40.8	32.8	36.2	8	-7.5	0.5	-2.9		Marino Rocks	Grey siltstone	January 5	Yes	4:47pm	34	0	Lower	Diloma concamerata	Wet
35.3	41.7	33.6	36	8.1	-6.4	1.7	-0.7		Marino Rocks	Grey siltstone	January 5	Yes	4:48pm	34	0	Lower	Diloma concamerata	Wet
35.3	40.8	31.9	35.4	8.9	-5.5	3.4	-0.1		Marino Rocks	Grey siltstone	January 5	Yes	4:49pm	34	0	Lower	Diloma concamerata	Wet
34.8	44.4	30.2	36.3	14.2	-9.6	4.6	-1.5		Marino Rocks	Grey siltstone	January 5	Yes	4:50pm	34	0	Lower	Diloma concamerata	Wet
31.4	44.6	29.2	35.5	15.4	-13.2	2.2	-4.1		Marino Rocks	Grey siltstone	January 5	Yes	4:51pm	34	0	Lower	Diloma concamerata	Wet
30.3	33.6	29.2	30.7	4.4	-3.3	1.1	-0.4		Marino Rocks	Grey siltstone	January 5	Yes	4:53pm	34	0	Lower	Diloma concamerata	Wet
34.7	45.4	32.7	37.8	12.7	-10.7	2	-3.1		Marino Rocks	Grey siltstone	January 5	Yes	4:56pm	34	0	Lower	Diloma concamerata	Wet
45.2	47.1	41.4	42.8	5.7	-1.9	3.8	2.4		Marino Rocks	Grey siltstone	January 5	No	3:30pm	35	0	Lower	Bembicium nanum	Dry
45.3	48.3	44.2	46.1	4.1	-3	1.1	-0.8		Marino Rocks	Grey siltstone	January 5	Yes	3:32pm	35	0	Lower	Bembicium nanum	Dry
46.2	46.3	37.4	41.8	8.9	-0.1	8.8	4.4		Marino Rocks	Grey siltstone	January 5	Yes	4:02pm	34	0	Lower	Bembicium nanum	Dry
44.7	48.7	40.4	43.8	8.3	-4	4.3	0.9		Marino Rocks	Grey siltstone	January 5	Yes	4:03pm	34	0	Lower	Bembicium nanum	Dry
39.5	45.4	36.4	40.5	9	-5.9	3.1	-1		Marino Rocks	Grey siltstone	January 5	Yes	4:04pm	34	0	Lower	Bembicium nanum	Dry
34.2	42.2	32.9	36.4	9.3	-8	1.3	-2.2		Marino Rocks	Grey siltstone	January 5	No	4:06pm	34	0	Lower	Bembicium nanum	Wet
44.8	50.8	42.1	45.5	8.7	-6	2.7	-0.7		Marino Rocks	Grey siltstone	January 5	No	4:09pm	34	0	Lower	Bembicium nanum	Dry
41.1	46	35.6	39.1	10.4	-4.9	5.5	2		Marino Rocks	Grey siltstone	January 5	Yes	4:15pm	34	0	Lower	Bembicium nanum	Dry
48.8	51.8	45.1	47.7	6.7	-3	3.7	1.1		Marino Rocks	Grey siltstone	January 5	Yes	4:18pm	34	0	Lower	Bembicium nanum	Dry
41	48.3	37.5	43.6	10.8	-7.3	3.5	-2.6		Marino Rocks	Grey siltstone	January 5	No	4:21pm	34	0	Lower	Bembicium nanum	Dry
43.5	50.7	39.4	44.3	11.3	-7.2	4.1	-0.8		Marino Rocks	Grey siltstone	January 5	Yes	4:44pm	34	0	Lower	Bembicium nanum	Dry
41.8	45.4	32.7	37.8	12.7	-3.6	9.1	4		Marino Rocks	Grey siltstone	January 5	No	4:56pm	34	0	Lower	Bembicium nanum	Wet
36.4	44.8	28.8	37.5	16	-8.4	7.6	-1.1		Marino Rocks	Grey siltstone	January 5	Yes	5:07pm	34	0	Upper	Bembicium nanum	Dry
39.9	48.5	38.9	43.1	9.6	-8.6	1	-3.2		Marino Rocks	Grey siltstone	January 5	Yes	5:11pm	34	0	Upper	Bembicium nanum	Dry
48.3	52.3	46.1	49	6.2	-4	2.2	-0.7		Marino Rocks	Grey siltstone	January 5	Yes	5:12pm	34	0	Upper	Bembicium nanum	Dry
45.8	49.6	40.5	45.1	9.1	-3.8	5.3	0.7		Marino Rocks	Grey siltstone	January 5	Yes	5:13pm	34	0	Upper	Bembicium nanum	Dry
44.3	48.1	42.3	44.5	5.8	-3.8	2	-0.2		Marino Rocks	Grey siltstone	January 5	Yes	5:14pm	34	0	Upper	Bembicium nanum	Dry
41.5	48	40.9	44	7.1	-6.5	0.6	-2.5		Marino Rocks	Grey siltstone	January 5	Yes	5:15pm	34	0	Upper	Bembicium nanum	Dry
43.1	50	41.4	44.7	8.6	-6.9	1.7	-1.6		Marino Rocks	Grey siltstone	January 5	Yes	5:16pm	34	0	Upper	Bembicium nanum	Dry
43	49.7	41.4	44.2	8.3	-6.7	1.6	-1.2		Marino Rocks	Grey siltstone	January 5	Yes	5:17pm	34	0	Upper	Bembicium nanum	Dry
48.1	50.2	42.5	47.3	7.7	-2.1	5.6	0.8		Marino Rocks	Grey siltstone	January 5	Yes	5:22pm	34	0	Upper	Bembicium nanum	Dry
40.1	41.7	37	38.7	4.7	-1.6	3.1	1.4		Marino Rocks	Grey siltstone	January 5	Yes	5:26pm	34	0	Upper	Bembicium nanum	Dry
46.8	49.9	43.8	45.9	6.1	-3.1	3	0.9		Marino Rocks	Grey siltstone	January 5	Yes	5:27pm	34	0	Upper	Bembicium nanum	Dry
38.5	43.5	32.6	36.1	10.9	-5	5.9	2.4		Marino Rocks	Grey siltstone	January 5	Yes	5:29pm	34	0	Upper	Bembicium nanum	Wet
42.5	47.6	40.7	43.7	6.9	-5.1	1.8	-1.2		Marino Rocks	Grey siltstone	January 5	Yes	5:30pm	34	0	Upper	Bembicium nanum	Dry
44.1	51.2	42.1	46.2	9.1	-7.1	2	-2.1		Marino Rocks	Grey siltstone	January 5	Yes	5:31pm	34	0	Upper	Bembicium nanum	Dry
42.9	45.3	32.1	37.7	13.2	-2.4	10.8	5.2		Marino Rocks	Grey siltstone	January 5	Yes	5:32pm	34	0	Upper	Bembicium nanum	Dry
49	50.7	41.6	46.7	9.1	-1.7	7.4	2.3		Marino Rocks	Grey siltstone	January 5	Yes	5:35pm	34	0	Upper	Bembicium nanum	Dry
43.1	50.4	31.9	42.2	18.5	-7.3	11.2	0.9		Marino Rocks	Grey siltstone	January 5	Yes	5:36pm	34	0	Upper	Bembicium nanum	Dry
45.7	51.9	42	47.1	9.9	-6.2	3.7	-1.4		Marino Rocks	Grey siltstone	January 5	Yes	5:37pm	34	0	Upper	Bembicium nanum	Dry
35.9	39.8	31.8	35.8	8	-3.9	4.1	0.1		OSullivan Beach	Quartzite	January 6	Yes	3:21pm	40	0	Lower	Nerita atramentosa	Dry
33.8	38.7	30.5	33.9	8.2	-4.9	3.3	-0.1		OSullivan Beach	Quartzite	January 6	Yes	3:22pm	40	0	Lower	Nerita atramentosa	Wet
39.4	41.9	33.2	36.4	8.7	-2.5	6.2	3		OSullivan Beach	Quartzite	January 6	Yes	3:24pm	40	0	Lower	Nerita atramentosa	Wet
32.3	40.9	30.5	34.2	10.4	-8.6	1.8	-1.9		OSullivan Beach	Quartzite	January 6	Yes	3:27pm	40	0	Lower	Nerita atramentosa	Wet
35.6	41.6	30.7	37.2	10.9	-6	4.9	-1.6		OSullivan Beach	Quartzite	January 6	Yes	3:28pm	40	0	Lower	Nerita atramentosa	Dry
33.8	37.8	31.6	33.8	6.2	-4	2.2	0		OSullivan Beach	Quartzite	January 6	Yes	3:29pm	40	0	Lower	Nerita atramentosa	Wet
33.3	41.3	31	34.9	10.3	-8	2.3	-1.6		OSullivan Beach	Quartzite	January 6	Yes	3:33pm	40	0	Lower	Nerita atramentosa	Wet
37	39.1	32.5	36	6.6	-2.1	4.5	1		OSullivan Beach	Quartzite	January 6	Yes	3:35pm	40	0	Lower	Nerita atramentosa	Wet
39.6	45.5	37.6	41.3	7.9	-5.9	2	-1.7		OSullivan Beach	Quartzite	January 6	Yes	3:36pm	40	0	Lower	Nerita atramentosa	Dry
32.8	35.9	30.2	32.8	5.7	-3.1	2.6	0		OSullivan Beach	Quartzite	January 6	Yes	3:40pm	40	0	Lower	Nerita atramentosa	Wet
36.5	40.7	32.8	36.6	7.9	-4.2	3.7	-0.1		OSullivan Beach	Quartzite	January 6	Yes	3:43pm	40	0	Lower	Nerita atramentosa	Dry
[truncated: 769 more rows]

[truncated: 5 more sheets: Habitats, B. nanum, D. concamerata, N. atramentosa, Mosaic patchiness]
